# Supplementary material for: Does cannabis legalisation change healthcare utilisation? A population-based study using the healthcare cost and utilisation project in Colorado, USA
Source: PubMed Central journal article supplement — BMJ Open. 2019 May 15;9(5):e027432. doi: 10.1136/bmjopen-2018-027432 (PMC6530411; doi:10.1136/bmjopen-2018-027432), 2019-05-15
Supplement: bmjopen-2018-027432.draft_revisions.pdf [file bmjopen-2018-027432.draft_revisions.pdf]

# BMJ Open

BMJ Open is committed to open peer review. As part of this commitment we make the peer review history of every article we publish publicly available.

When an article is published we post the peer reviewers' comments and the authors' responses online. We also post the versions of the paper that were used during peer review. These are the versions that the peer review comments apply to.

The versions of the paper that follow are the versions that were submitted during the peer review process. They are not the versions of record or the final published versions. They should not be cited or distributed as the published version of this manuscript.

BMJ Open is an open access journal and the full, final, typeset and author-corrected version of record of the manuscript is available on our site with no access controls, subscription charges or pay-per-view fees (<http://bmjopen.bmj.com>).

If you have any questions on BMJ Open's open peer review process please email [info.bmjopen@bmj.com](mailto:info.bmjopen@bmj.com)

# BMJ Open

## Changes in Inpatient Healthcare Utilization after Legalization of Recreational Cannabis

|                               |                                                                                                                                                                                                                                                                                                                                                                                                                                                                                                                                                                                                                                                                                                                                                           |
|-------------------------------|-----------------------------------------------------------------------------------------------------------------------------------------------------------------------------------------------------------------------------------------------------------------------------------------------------------------------------------------------------------------------------------------------------------------------------------------------------------------------------------------------------------------------------------------------------------------------------------------------------------------------------------------------------------------------------------------------------------------------------------------------------------|
| Journal:                      | <i>BMJ Open</i>                                                                                                                                                                                                                                                                                                                                                                                                                                                                                                                                                                                                                                                                                                                                           |
| Manuscript ID                 | bmjopen-2018-027432                                                                                                                                                                                                                                                                                                                                                                                                                                                                                                                                                                                                                                                                                                                                       |
| Article Type:                 | Research                                                                                                                                                                                                                                                                                                                                                                                                                                                                                                                                                                                                                                                                                                                                                  |
| Date Submitted by the Author: | 22-Oct-2018                                                                                                                                                                                                                                                                                                                                                                                                                                                                                                                                                                                                                                                                                                                                               |
| Complete List of Authors:     | Delling, Francesca; University of California, San Francisco<br>Vittinghoff, Eric; University of California, San Francisco,<br>Dewland, Thomas; Oregon Health & Science University, Medicine<br>Pletcher, Mark; University of California, San Francisco, Epidemiology and<br>Biostatistics<br>Olgin, J; University of California San Francisco<br>Nah, Gregory; University of California San Francisco<br>Aschbacher, Kirstin; University of California, San Francisco<br>Fang, Christina; University of California, San Francisco<br>Lee, Emily; University of California, San Francisco<br>Fan, Shannon; University of California, San Francisco<br>Kazi, Dhruv; University of California San Francisco, Medicine (Cardiology)<br>Marcus, Gregory; UCSF, |
| Keywords:                     | Healthcare utilization, Health policy < HEALTH SERVICES<br>ADMINISTRATION & MANAGEMENT, Cannabis legalization                                                                                                                                                                                                                                                                                                                                                                                                                                                                                                                                                                                                                                             |
|                               |                                                                                                                                                                                                                                                                                                                                                                                                                                                                                                                                                                                                                                                                                                                                                           |

SCHOLARONE™  
Manuscripts

## Changes in Inpatient Healthcare Utilization after Legalization of Recreational Cannabis

Francesca N. Delling, MD, MPH;<sup>1</sup> Eric Vittinghoff, PhD;<sup>1</sup> Thomas A. Dewland, MD;<sup>2</sup> Mark J. Pletcher, MD, MPH;<sup>1</sup> Jeffrey E. Olgin, MD;<sup>1</sup> Gregory Nah, MA;<sup>1</sup> Kirstin Aschbacher, PhD;<sup>1</sup> Christina Fang, BA;<sup>1</sup> Emily S. Lee, BA;<sup>1</sup> Shannon M. Fan, BA;<sup>1</sup> Dhruv S. Kazi, MD, MS;<sup>1</sup> and Gregory M. Marcus, MD, MAS.<sup>1</sup>

<sup>1</sup>Department of Medicine, Division of Cardiology, University of California, San Francisco, San Francisco, CA, USA

<sup>2</sup>Knight Cardiovascular Institute, Oregon Health & Science University, Portland, OR, USA

**Corresponding Author:** Gregory M. Marcus, MD, MAS, Division of Cardiology, University of California, San Francisco, 505 Parnassus Avenue, Room M1180B, San Francisco, CA 94117 ([marcusg@medicine.ucsf.edu](mailto:marcusg@medicine.ucsf.edu)).

The Corresponding Author has the right to grant on behalf of all authors and does grant on behalf of all authors, an exclusive license (or non-exclusive for government employees) on a worldwide basis to the BMJ Publishing Group Ltd to permit this article (if accepted) to be published in BMJ editions and any other BMJ PGL products and sublicenses such use and exploit all subsidiary rights, as set out in our license.

**Total Word Count:** 2550

## ABSTRACT

**OBJECTIVE:** To assess the effect of cannabis legalization on health effects and healthcare utilization.

**DESIGN:** We used the 2010-2014 Healthcare Cost and Utilization Project (HCUP) inpatient databases to compare changes in rates of healthcare utilization and diagnoses in Colorado (CO) versus 2 control states, New York (NY) and Oklahoma (OK).

**SETTING:** Population-based, inpatient.

**PARTICIPANTS:** HCUP state-wide data comprising over 28 million individuals and over 16 million hospitalizations across 3 states.

**MAIN OUTCOME MEASURES:** We used International Classification of Diseases-9<sup>th</sup> Edition (ICD-9) codes to assess changes in healthcare utilization specific to various medical diagnoses potentially treated by or exacerbated by cannabis use. Diagnoses were classified based on weight of evidence from the National Academy of Science (NAS).

**RESULTS:** In CO compared to NY and OK, respectively, cannabis abuse increased (risk ratio [RR], 1.30; 95% confidence interval [CI], 1.26 to 1.34 and RR 1.27; 95% CI 1.27 to 1.28) post-legalization. In CO, there was a minimal reduction in total admissions (RR 0.98; 95% CI 0.98 to 0.99 and RR 0.97; 95% CI 0.92 to 1.02) and length of stay (-3.98% per year; 95% CI -4.13 to -3.82% and -2.48%, 95% CI -2.57 to -2.38%), and a small yearly increase in costs (1.83%; 95% CI 1.82 to 1.84% and 4.9%; 95% CI 4.68 to 5.13%) compared to NY and OK, respectively. Post-legalization changes most consistent with NAS-based evidence included less Tourette syndrome and post-traumatic stress disorder, but more alcohol abuse (each meeting a Bonferroni-corrected  $P < 0.0014$  compared to each control state).

**CONCLUSIONS:** Cannabis legalization is associated with neutral effects on healthcare utilization, and variable health effects relative to previously established evidence. Such

1  
2  
3  
4  
5  
6  
7  
8  
9  
10  
11  
12  
13  
14  
15  
16  
17  
18  
19  
20  
21  
22  
23  
24  
25  
26  
27  
28  
29  
30  
31  
32  
33  
34  
35  
36  
37  
38  
39  
40  
41  
42  
43  
44  
45  
46  
47  
48  
49  
50  
51  
52  
53  
54  
55  
56  
57  
58  
59  
60

population-level effects may help guide future decisions regarding cannabis use, prescription, and policy.

For peer review only

### Strengths and limitations of this study

- The study focuses on the impact of recreational cannabis legalization on health care utilization instead of its legal or societal effects
- This study utilizes HCUP data comprising over 28 million individuals and over 16 million hospitalizations
- Stringent standards were employed to address possible false positives due to multiple hypotheses testing
- Follow up data after the 2012 Amendment 64 only includes two subsequent years
- Physician coding with ICD-9 codes does not capture potentially important mediators related to cannabis use

## INTRODUCTION

Over 147 million people, or 2.5 percent of the world's population, use cannabis (marijuana),<sup>1</sup> and more than 20 million Americans have reported the use of cannabis in the past 30 days.<sup>1</sup> Because cannabis use is a federal crime, clinical studies have been challenging to pursue, resulting in substantial knowledge gaps regarding actual health consequences. Twenty-eight states and the District of Columbia now allow cannabis for the treatment of medical conditions.<sup>2</sup> Of these, 9 have recently legalized cannabis for recreational use. Given such pervasive policy changes, understanding potential shifts in healthcare utilization is vital.

A rigorous summary of the evidence regarding the health effects of cannabis was recently reported by the National Academy of Science (NAS).<sup>3</sup> While this is a valuable starting place that makes use of the available data, we do not yet know whether that evidence, based largely on small studies, will translate into real-world ramifications after legalization of recreational cannabis.

On December 10, 2012, Colorado enacted *Colorado Amendment 64*, legalizing recreational cannabis. This change provides a unique opportunity to observe changes in healthcare utilization and diagnoses that occur when access to cannabis becomes liberalized.

## METHODS

We used Agency for Healthcare Research and Quality (AHRQ)-funded Healthcare Cost and Utilization Project (HCUP) databases to measure inpatient healthcare utilization and diagnoses in Colorado (CO) between 2010 and 2014. Comparisons were made

1  
2  
3 with 2 control states in order to address possible secular trends. New York (NY), the  
4 most populous state with inpatient HCUP data available up to 2014 was selected, and,  
5  
6 to counter this coastal and largely urban state, we also selected Oklahoma (OK), a  
7  
8 predominately rural state directly adjacent to CO with HCUP hospitalization data up to  
9  
10 2014. Annual demographic data, including age, sex, and race, was obtained from the  
11  
12 United States Census Bureau. Only month and year were available in all HCUP  
13  
14 databases; as legalization took effect on December 10, 2012, hospitalizations following  
15  
16 December 2012 were considered “after” enactment of the law. Patients with missing  
17  
18 information on age, sex, race, and year of encounter were excluded.  
19  
20  
21  
22

23  
24 Age, sex, race, income level, and insurance payer were recorded at each  
25  
26 healthcare encounter. Hispanic ethnicity was not coded in the OK State Department of  
27  
28 Health data source. In order to use comparable categorizations across the 3 states, we  
29  
30 separated race into white, black, Native American, and other. Income level was  
31  
32 categorized by quartiles using the median household income for each patient’s ZIP  
33  
34 code. Income level was not available for OK.  
35  
36  
37

38 We first performed a validation analysis to assess changes in cannabis abuse  
39  
40 diagnoses in CO after versus before recreational cannabis legalization and compared  
41  
42 those rates to changes in NY and OK over the same time period. To determine changes  
43  
44 in overall healthcare utilization, we assessed changes in total number of  
45  
46 hospitalizations, length of inpatient stay, and healthcare costs. We estimated the cost of  
47  
48 each hospitalization by multiplying the charges by a cost-to-charge ratio for the  
49  
50 admitting hospital for the given year. For NY and CO, we used the all-payer cost-to-  
51  
52 charge ratios provided by HCUP. When the all-payer cost-to-charge ratio was missing,  
53  
54  
55  
56  
57  
58  
59  
60



1  
2  
3 we applied the average cost-to-charge ratio particular to state and year. As HCUP does  
4  
5 not provide cost-to-charge ratios for OK, we assumed a constant state-wide cost-to-  
6  
7 charge ratio (0.3119 as derived from the Institute for Health and Socio-Economic Policy  
8  
9 calculations of federal cost reports) to estimate healthcare costs in OK;<sup>4</sup> we then  
10  
11 conducted a sensitivity analysis setting the cost-to-charge ratio for OK to equal to the  
12  
13 average for NY and CO for the corresponding year. See online supplementary  
14  
15 eMethods and eTable 1 for additional details.  
16  
17  
18

19 We used International Classification of Diseases-9<sup>th</sup> Edition (ICD-9) codes (see  
20  
21 online supplementary eTable 2) to assess changes in healthcare utilization specific to  
22  
23 various medical diagnoses potentially treated by or exacerbated by cannabis use as  
24  
25 identified by the NAS summary. Only diagnoses with substantial, moderate, or limited  
26  
27 evidence per the NAS were included.  
28  
29

30  
31 Certification to use de-identified HCUP data was obtained from the University of  
32  
33 California, San Francisco Committee on Human Research.  
34  
35  
36  
37

### 38 **Statistical Analysis**

39  
40 Demographic and lifestyle characteristics are presented as mean  $\pm$  standard deviation  
41  
42 (SD) or n (% of total admissions) and were compared between states using linear,  
43  
44 logistic, and multinomial models as appropriate. Rates of admissions for NAS diagnoses  
45  
46 (with the population size as the denominator) were compared between states using  
47  
48 negative binomial models.  
49  
50

51 To assess the effects of recreational cannabis legalization, we used negative  
52  
53 binomial models for the number of admissions, both overall and for particular  
54  
55  
56  
57  
58  
59  
60

1  
2  
3 diagnoses, with the log of the subgroup population sizes as an offset and the use of  
4 robust standard errors. Analogous linear models were utilized for length of stay and  
5  
6 robust standard errors. Analogous linear models were utilized for length of stay and  
7  
8 cost, which were both log-transformed in order to meet normality assumptions. All  
9  
10 models were adjusted for age, race, and sex. In order to relax the linearity assumption,  
11  
12 each 5-year age range was included as a separate category. To flexibly model secular  
13  
14 patterns, year was included as a categorical rather than continuous variable (with a  
15  
16 category for each year between 2010 and 2014). The crucial predictors in our model  
17  
18 included an indicator for CO (versus the comparison state) and interactions of this  
19  
20 indicator with 2 continuous linear spline basis functions, year-2012, and max (0, year-  
21  
22 2012). The main effect for CO estimated the between-state risk ratio (RR) in 2012, the  
23  
24 first interaction estimated the slope of the between-state RR in 2010-12, and the second  
25  
26 estimated the change in slope after 2012. The first interaction was used to project the  
27  
28 counterfactual 2013-2014 rates in CO that would be expected in the absence of  
29  
30 legalization, while the second was used to capture the legalization effect. Like a  
31  
32 standard interrupted time series (ITS) model, our model assumed that the between-  
33  
34 state RR changed linearly at different rates before and after the intervention, but used  
35  
36 the categorical indicator for year to relax the standard ITS assumption of piecewise  
37  
38 linear trends in the underlying state-specific rates, substantially improving model fit.

39  
40  
41 A 2-tailed  $P < 0.05$  was considered statistically significant for the validation  
42  
43 analyses (cannabis use), and analyses related to overall healthcare utilization. In order  
44  
45 to minimize false positive results and to account for secular trends that might differ  
46  
47 across different populations, we assessed for validation in comparisons versus NY and  
48  
49 then OK separately.  
50  
51  
52  
53  
54  
55  
56  
57  
58  
59  
60

1  
2  
3 In order to address possible false positives due to multiple hypotheses testing in  
4 assessing all of the diagnoses described in the NAS document, we employed stringent  
5 standards: to be considered “positive,” the comparisons between CO and *each* of the  
6 other 2 states needed to be in the direction expected from the NAS report, each  
7 exhibiting statistical significance using a Bonferroni-corrected two-tailed alpha of 0.0014  
8 ( $P=0.05$  divided by 35, the number of comparisons derived from NAS-based  
9 diagnoses). A “positive” designation also required absence of a statistically significant  
10 difference between NY versus OK using a two-tailed alpha of 0.05. All analyses were  
11 performed using Stata 15 (StataCorp, College Station, TX).  
12  
13  
14  
15  
16  
17  
18  
19  
20  
21  
22  
23  
24  
25

## 26 **Patient and Public Involvement**

27  
28 The patients and public were not involved in the study.  
29  
30  
31  
32

## 33 **RESULTS**

### 34 **Baseline Characteristics**

35  
36 The total number of admissions between 2010 and 2014 are shown for each state in  
37 **table 1**. Patients in CO were generally younger, more commonly female, and less  
38 ethnically diverse. Wealth in CO was less equally distributed, with a higher proportion of  
39 individuals with lower income in CO compared to NY. Finally, admission rates were  
40 lower in CO than the control states for most NAS diagnoses, with exceptions for pre-  
41 diabetes and post-traumatic stress disorder.  
42  
43  
44  
45  
46  
47  
48  
49  
50  
51  
52  
53

### 54 **Study Validation**

1  
2  
3 Over 2010-2014, the change in rates of cannabis abuse admissions after versus before  
4 recreational cannabis legalization in 2012 was greater in CO than in NY and OK (risk  
5 ratio [RR], 1.3; 95% confidence interval [CI], 1.2 to 1.3 and RR 1.27; 95% CI 1.27 to  
6 1.28; both  $P < 0.00005$ , respectively) (**figure 1A-B**). No significant changes comparing  
7 the two control states, NY and OK, were observed over the same time period (RR 0.96;  
8 95% CI 0.88 to 1.03;  $P = 0.26$ ).

### 19 **Inpatient Healthcare Utilization after Cannabis Legalization**

#### 21 *Number of admissions*

22  
23 In unadjusted analyses, CO, NY, and OK had a similar number of total admissions  
24 before and after cannabis legalization (**figure 2A**). After taking population demographics  
25 into account, there was a reduction of number of admissions following *Colorado*  
26 *Amendment 64* in CO when compared to NY (RR 0.98; 95% CI 0.98 to 0.99;  
27  $P < 0.00005$ ). The point estimate was similar when comparing CO to OK, but did not  
28 reach statistical significance (RR 0.97; 95% CI 0.92 to 1.02;  $P = 0.27$ ).

#### 39 *Length of stay*

40  
41 The median length of stay was also similar after cannabis legalization across the 3  
42 states in unadjusted analyses (**figure 2B**). After adjusting for population demographics,  
43 length of inpatient stay was shorter in CO following the law change when compared with  
44 each of the 2 control states (3.98% annual reduction; 95% CI -4.13% to -3.82% in CO  
45 versus NY, and 2.48% annual reduction, 95% CI -2.57% to -2.38% versus OK; both  $P =$   
46 0.002).

### Healthcare Costs

In unadjusted analyses, the 3 states exhibited similar total costs across the study time period (**figure 2C** and online supplementary eTable 2). In multivariate analyses accounting for population demographics, healthcare costs increased by 1.83% (95% CI 1.82 to 1.84%;  $P=0.0003$ ) in CO compared to NY and by 4.9% (95% CI 4.68 to 5.13%;  $P=0.0023$ ) versus OK after cannabis legalization. No meaningful differences were observed in the sensitivity analysis assuming the cost-to-charge ratio for OK was equal to the average of the other states.

### Changes in Specific Diagnoses Highlighted by the National Academy of Sciences

Among the diagnoses with evidence of influence by cannabis per the NAS (**figure 3**), we distinguished between: 1) a group with no statistically significant post-legalization differences between control states (NY versus OK  $P>0.05$ ), suggesting that secular trends unlikely explained differences between CO and control states; and 2) a group with significant differences in diagnoses post-legalization between control states (NY versus OK  $P<0.05$ ).

In the NY versus OK  $P>0.05$  group (**figure 3**), changes in rates of diagnoses after cannabis legalization did not consistently reflect NAS-based evidence. Among the diagnoses most consistent with NAS-based evidence, there was a reduction in Tourette syndrome and post-traumatic stress disorder, and an increase in alcohol abuse after cannabis legalization (each meeting the Bonferroni-corrected alpha,  $P<0.0014$ ). Motor vehicle accidents also increased, although the  $P$  value compared to OK was 0.073.

1  
2  
3 Among outcomes where the direction of the effect was discordant with NAS-based  
4 evidence, most diagnoses (predominantly cardiometabolic and psychiatric) rested on  
5 limited (rather than moderate or substantial) NAS-based evidence. In the NY versus OK  
6  $P < 0.05$  group (**figure 3**), changes in diagnoses that were concordant with NAS findings  
7 and met the Bonferroni alpha included a reduction in chronic pain and an increase in  
8 hallucinations. Changes of risk over time with counterfactual are shown for each NAS  
9 diagnosis in online supplementary eFigures 1-31.  
10  
11  
12  
13  
14  
15  
16  
17  
18  
19  
20

## 21 **DISCUSSION**

### 22 **Principal findings**

23  
24  
25  
26 Legalization of recreational cannabis was associated with more cannabis abuse, and  
27 minimal effects on overall healthcare utilization. Changes in specific medical diagnoses  
28 post-legalization did not consistently reflect previously published evidence on the health  
29 effects of cannabis.  
30  
31  
32  
33

34  
35 The increased frequency of cannabis abuse diagnoses in CO helps to validate  
36 the concept that legalization would result in greater use.  
37  
38

39  
40 Effects of cannabis legalization on healthcare utilization appeared to be overall  
41 neutral. There was no evidence that either the number of overall hospitalizations or  
42 length of stay increased. However, yearly total costs in CO increased to a small degree  
43 compared to NY and OK following cannabis legalization, potentially because changing  
44 admissions for specific medical diagnoses may have driven costs differently.  
45  
46  
47  
48  
49

50  
51 Changes in the frequency of diagnoses did not consistently reflect NAS-based  
52 evidence. Among the changes in diagnoses consistent with NAS-based evidence that  
53  
54  
55  
56  
57  
58  
59  
60

1  
2  
3 met the stringent criteria described in the Methods section, there was a reduction in  
4  
5 Tourette syndrome and in post-traumatic stress disorder, and an increase in alcohol  
6  
7 abuse after cannabis legalization. Motor Vehicle accidents also became more common  
8  
9 (meeting Bonferroni-corrected  $P$  value versus NY, but did not reach statistical  
10  
11 significance compared to OK). Although both cited by the NAS as based on limited  
12  
13 evidence, cannabis has been shown to be effective in suppressing tics and associated  
14  
15 behavioral problems in Tourette syndrome<sup>9</sup> and in reducing symptoms attributed to  
16  
17 post-traumatic stress disorder.<sup>10</sup> Consistent with our findings, a substantial bidirectional  
18  
19 comorbidity between cannabis use and alcohol use has been previously demonstrated,  
20  
21 resulting in a moderate level of evidence designation for this relationship per the NAS.<sup>11</sup>  
22  
23 Finally, the NAS document described strong evidence supporting a relationship  
24  
25 between cannabis use and motor vehicle accidents, consistent with our data and  
26  
27 findings from a meta-analysis using either self-report or laboratory evidence of cannabis  
28  
29 use.<sup>12</sup>  
30  
31  
32  
33  
34  
35  
36  
37

### 38 **Strengths and Weaknesses**

39  
40 Although several studies have investigated the health effects of cannabis,<sup>5</sup> they have  
41  
42 relied on small sample sizes or have generated conflicting data.<sup>6-8</sup> In contrast, our  
43  
44 findings are derived from HCUP state-wide data comprising over 28 million individuals  
45  
46 and over 16 million hospitalizations across CO, site of the 2012 *Amendment 64*, and 2  
47  
48 controls states without cannabis legalization over the same time period.  
49  
50

51 Several limitations should be acknowledged. The HCUP database relies on  
52  
53 physician coding; however, such coding for several medical diagnoses listed in **table 1**  
54  
55  
56  
57  
58  
59  
60

1  
2  
3 have been shown to be highly specific with variable sensitivity<sup>4, 13, 14</sup> and HCUP has  
4  
5 proven to be a powerful tool in large population studies.<sup>15-19</sup> Some potentially important  
6  
7 mediators are not captured by ICD-9 codes, such as quantity of cannabis used or  
8  
9 formulation (oral versus other), although these may be more relevant to identifying  
10  
11 mechanisms and their absence would likely not lead to false positive results. As with  
12  
13 any observational study, we cannot exclude residual confounding as an explanation of  
14  
15 our findings. However, we adjusted for conventionally recognized confounders as  
16  
17 appropriate and as available, and, as this was largely a study of the same populations  
18  
19 pre- and post-legalization, many of the limitations inherent to conventional individual-  
20  
21 level analyses are likely less relevant. The HCUP database does not capture  
22  
23 information regarding outpatient activity and therefore these findings are restricted to  
24  
25 hospital-based medicine. Our use of Bonferroni correction in assessing changes related  
26  
27 to NAS diagnoses may have been too conservative, leading to a sacrifice of false  
28  
29 negatives in order to avoid false positives. Finally, our study was limited to two-year  
30  
31 follow-up after cannabis legalization, and we therefore cannot comment on long-term  
32  
33 effects that may result.  
34  
35  
36  
37  
38  
39  
40  
41

## 42 **Conclusions**

43  
44 In conclusion, cannabis legalization is associated with an expected increase in cannabis  
45  
46 abuse. Overall effects on inpatient healthcare utilization appear to be neutral, with  
47  
48 subtle changes in various components of that utilization likely occurring due to changes  
49  
50 in the types of admissions observed. Measurable effects of cannabis legalization on  
51  
52 various inpatient diagnoses are not all consistent with previous evidence based on small  
53  
54  
55  
56  
57  
58  
59  
60



1  
2  
3 studies and experience outside the world of legalized recreational cannabis. These data  
4  
5 provide the first description of population-level effects that may help guide future  
6  
7 decisions regarding cannabis policy, individuals considering using cannabis, and  
8  
9 physicians caring for those who may choose to consume it.  
10  
11  
12  
13  
14  
15  
16  
17  
18  
19  
20  
21  
22  
23  
24  
25  
26  
27  
28  
29  
30  
31  
32  
33  
34  
35  
36  
37  
38  
39  
40  
41  
42  
43  
44  
45  
46  
47  
48  
49  
50  
51  
52  
53  
54  
55  
56  
57  
58  
59  
60

For peer review only

1  
2  
3 **Contributors** FND and GMM had full access to all of the data in the study and take  
4 responsibility for the integrity of the data and the accuracy of the data analysis. FND  
5 and GMM were responsible for the study concept and design. All authors contributed to  
6 data acquisition, analysis, and interpretation. EV, GN, and GMM completed the  
7 statistical analysis. FND and GMM drafted the manuscript and were responsible for the  
8 critical revision of the manuscript for important intellectual content. GMM obtained  
9 funding for the study. All authors contributed to the administrative, technical, and  
10 material support for the study and approved the final version of the manuscript.

11  
12 **Funding** This work was supported by the Agency for Healthcare Research and Quality  
13 (AHRQ) and Health Care Information (HCI) Division of the Oklahoma State Department  
14 of Health. The funding source had no role in the design, conduct, or analysis of the  
15 study; data analysis or interpretation; preparation of the manuscript; or the decision to  
16 submit the manuscript for publication.

17  
18 **Competing interests** None declared.

19  
20 **Patient consent** Not required.

21  
22 **Ethics approval** Ethical approval to use de-identified HCUP data was obtained from  
23 the University of California, San Francisco Committee on Human Research.

24  
25 **Data sharing** No additional data are available.

26  
27 **Open access** This is an open access article distributed in accordance with the  
28 Creative Commons Attribution Non Commercial (CC BY-NC 4.0) license, which  
29 permits others to distribute, remix, adapt, build upon this work non-commercially,  
30 and license their derivative works on different terms, provided the original work is  
31 properly cited, appropriate credit is given, any changes made indicated, and the use

1  
2  
3  
4  
5  
6  
7  
8  
9  
10  
11  
12  
13  
14  
15  
16  
17  
18  
19  
20  
21  
22  
23  
24  
25  
26  
27  
28  
29  
30  
31  
32  
33  
34  
35  
36  
37  
38  
39  
40  
41  
42  
43  
44  
45  
46  
47  
48  
49  
50  
51  
52  
53  
54  
55  
56  
57  
58  
59  
60

is non-commercial. See: <http://creativecommons.org/licenses/by-nc/4.0/>.

For peer review only

## References

1. Substance Abuse and Mental Health Services Administration. *Behavioral health trends in the United States: Results from the 2014 National Survey on Drug Use and Health*. Rockville, MD: U.S. Dept. of Health and Human Services; 2016. HHS Publication No. SMA 15-4927, NSDUH Series H-50.
2. State Medical Marijuana Laws 2016. National Conference of State Legislatures. <http://www.ncsl.org/research/health/state-medical-marijuana-laws.aspx>. Updated June 27, 2018. Accessed December 1, 2017.
3. Committee on the Health Effects of Marijuana, Board on Population Health and Public Health Practice, Health and Medicine Division, National Academies of Sciences, Engineering, and Medicine. *The Health Effects of Cannabis and Cannabinoids : The Current State of Evidence and Recommendations for Research*. Washington, DC: The National Academies Press; 2017.
4. Institute for Health & Socioeconomic Policy. *Average Charge-to-cost Ratio by State*. Silver Spring, MD: National Nurses United; 2012.
5. Karila L, Roux P, Rolland B, et al. Acute and long-term effects of cannabis use: a review. *Curr Pharm Des*. 2014;20(25):4112-8.
6. Schreiner AM, Dunn ME. Residual effects of cannabis use on neurocognitive performance after prolonged abstinence: a meta-analysis. *Exp Clin Psychopharmacol*. 2012;20(5):420-9.
7. Volkow ND. Effects of Cannabis Use on Human Behavior-Reply. *JAMA Psychiatry*. 2016;73(9):996.

- 1  
2  
3 8. Lynskey MT, Glowinski AL, Todorov AA, et al. Major depressive disorder, suicidal  
4 ideation, and suicide attempt in twins discordant for cannabis dependence and early-  
5 onset cannabis use. *Arch Gen Psychiatry*. 2004;61(10):1026-32.  
6  
7
- 8 9. Muller-Vahl KR. Treatment of Tourette syndrome with cannabinoids. *Behav*  
9  
10  
11  
12 *Neurol*. 2013;27(1):119-24.  
13
- 14 10. O'Neil ME, Nugent SM, Morasco BJ, et al. Benefits and Harms of Plant-Based  
15  
16  
17  
18  
19  
20  
21  
22  
23  
24  
25  
26  
27  
28  
29  
30  
31  
32  
33  
34  
35  
36  
37  
38  
39  
40  
41  
42  
43  
44  
45  
46  
47  
48  
49  
50  
51  
52  
53  
54  
55  
56  
57  
58  
59  
60  
10. O'Neil ME, Nugent SM, Morasco BJ, et al. Benefits and Harms of Plant-Based  
Cannabis for Posttraumatic Stress Disorder: A Systematic Review. *Ann Intern Med*.  
2017;167(5):332-40.
11. Blanco C, Hasin DS, Wall MM, et al. Cannabis Use and Risk of Psychiatric  
Disorders: Prospective Evidence From a US National Longitudinal Study. *JAMA*  
*Psychiatry*. 2016;73(4):388-95.
12. Li MC, Brady JE, DiMaggio CJ, Lusardi AR, Tzong KY, Li G. Marijuana use and  
motor vehicle crashes. *Epidemiol Rev*. 2012;34:65-72.
13. Kim HM, Smith EG, Stano CM, et al. Validation of key behaviourally based  
mental health diagnoses in administrative data: suicide attempt, alcohol abuse, illicit  
drug abuse and tobacco use. *BMC Health Serv Res*. 2012;12:18.
14. McCormick N, Lacaille D, Bhole V, Avina-Zubieta JA. Validity of myocardial  
infarction diagnoses in administrative databases: a systematic review. *PLoS One*.  
2014;9(3):e92286.
15. Dewland TA, Olgin JE, Vittinghoff E, Marcus GM. Incident atrial fibrillation among  
Asians, Hispanics, blacks, and whites. *Circulation*. 2013;128(23):2470-7.
16. Birkmeyer JD, Siewers AE, Finlayson EV, et al. Hospital volume and surgical  
mortality in the United States. *N Engl J Med*. 2002;346(15):1128-37.

- 1  
2  
3 17. Gialdini G, Nearing K, Bhave PD, et al. Perioperative atrial fibrillation and the  
4 long-term risk of ischemic stroke. *JAMA*. 2014;312(6):616-22.  
5  
6  
7 18. Dukes JW, Dewland TA, Vittinghoff E, et al. Access to alcohol and heart disease  
8 among patients in hospital: observational cohort study using differences in alcohol sales  
9 laws. *BMJ*. 2016;353:i2714.  
10  
11  
12 19. Whitman IR, Agarwal V, Nah G, et al. Alcohol Abuse and Cardiac Disease. *J Am*  
13 *Coll Cardiol*. 2017;69(1):13-24.  
14  
15  
16  
17  
18  
19  
20  
21  
22  
23  
24  
25  
26  
27  
28  
29  
30  
31  
32  
33  
34  
35  
36  
37  
38  
39  
40  
41  
42  
43  
44  
45  
46  
47  
48  
49  
50  
51  
52  
53  
54  
55  
56  
57  
58  
59  
60

## FIGURE LEGENDS

**Figure 1.** Multivariate adjusted rates of admissions for cannabis abuse over 2010-2014 in Colorado, site of implementation of the 2012 recreational cannabis legalization policy, compared with New York (A) and Oklahoma (B), control states without cannabis legalization. Red lines show the predicted rates of admissions for cannabis abuse had the cannabis legalization policy not been instituted. The comparison between Colorado and the control states with regards to change of risk ratio (RR) slope within the 2010-2012 period (pre-legalization) and 2012-2014 period (post-legalization), as well of the overall RR slope change, are also represented for the Colorado versus New York (A) and Colorado versus Oklahoma (B) comparisons. Red lines show the predicted rates of admissions for cannabis abuse had the cannabis legalization policy not been instituted. Each model was adjusted for age, gender, and race (see Methods section for further details). CI = confidence interval; vs = versus.

**Figure 2.** Healthcare utilization over 2010-2014 in Colorado, site of implementation of the 2012 recreational cannabis legalization policy, and in New York and Oklahoma, control states without cannabis legalization. The total number of admissions/1000 population per year, the median length of stay per year, and the median costs per individual per year are shown in panels A, B, and C, respectively for the 3 states. Error bars denote interquartile ranges. LOS = length of stay.

**Figure 3.** Health outcomes with at least limited evidence of a statistical association with cannabis use based on the National Academy of Science (NAS) summary statement. Two main groups of medical diagnoses are identified based on a non-significant ( $P>0.05$ ) (A) versus significant ( $P<0.05$ ) (B) comparison between New York (NY) and

1  
2  
3 Oklahoma (OK) (control states without cannabis legalization) with regards to the change  
4 of admission rates for such diagnoses following cannabis legalization. *P* values for the  
5 comparison between Colorado (CO) (site of cannabis legalization) and NY (rhomboid  
6 symbol), or between CO and OK (circular symbol) are shown as either <0.0014  
7 (Bonferroni), <0.05, or > 0.05 using a gray scale for evidence of cannabis benefit (risk  
8 ratio [RR] < 1 shown on the left) and cannabis harm (RR>1 shown on the right).  
9  
10 Progressively darker shades of green or red indicate greater weight of evidence in the  
11 direction of proposed benefit versus harm, respectively, by the NAS.  
12  
13  
14  
15  
16  
17  
18  
19  
20  
21  
22  
23  
24  
25  
26  
27  
28  
29  
30  
31  
32  
33  
34  
35  
36  
37  
38  
39  
40  
41  
42  
43  
44  
45  
46  
47  
48  
49  
50  
51  
52  
53  
54  
55  
56  
57  
58  
59  
60



**Table 1.** Baseline clinical characteristics of the 3 study states.

|                                                                             | Colorado       | New York       | Oklahoma       | <i>P</i> value |
|-----------------------------------------------------------------------------|----------------|----------------|----------------|----------------|
| Total population                                                            | 5,197,237      | 19,594,599     | 3,819,383      |                |
| Total admissions                                                            | 2,088,909      | 11,726,283     | 2,334,988      |                |
| Total admissions/1,000 population                                           | 402±0.27       | 598±0.17       | 611±0.40       | 0.0001         |
| <b>Demographics</b>                                                         |                |                |                |                |
| Age – yr                                                                    | 45 ± 28        | 49 ± 28        | 48 ± 28        | 0.0001         |
| Male – no. (%)                                                              | 870,573 (42)   | 5,087,181 (41) | 954,848 (43)   | 0.0001         |
| Race – no. (%)                                                              |                |                |                | 0.0001         |
| White                                                                       | 1,548,099 (74) | 6,406,582 (55) | 1,879,727 (81) |                |
| Black                                                                       | 102,444 (5)    | 2,083,366 (18) | 202,420 (9)    |                |
| Native American                                                             | 13,143 (1)     | 36,216 (0.3)   | 131,714 (6)    |                |
| Other                                                                       | 425,223 (20)   | 3,200,119 (27) | 121,127 (5)    |                |
| <b>Lifestyle</b>                                                            |                |                |                |                |
| Median Household Income, dollars (quartiles for patient ZIP code) – no. (%) |                |                |                | 0.0001         |
| Quartile 1                                                                  | 617,537 (30)   | 3,087,192 (28) | No data        |                |
| Quartile 2                                                                  | 558,760 (27)   | 2,623,087 (24) |                |                |
| Quartile 3                                                                  | 470,051 (23)   | 2,673,153 (24) |                |                |
| Tobacco use – no. (%)                                                       | 251,566 (12)   | 1,717,940 (10) | 235,685 (14)   | 0.0001         |
| Alcohol abuse – no. (%)                                                     | 112,715 (5)    | 652,608 (6)    | 71,931 (3)     | 0.0001         |
| <b>NAS Diagnoses</b>                                                        |                |                |                |                |
| Non-seminoma type testicular germ cell cancer – no. (%)                     | 405 (0.02)     | 2,487 (0.02)   | 480 (0.02)     | 0.0001         |
| Acute myocardial infarction – no. (%)                                       | 39,513 (1.9)   | 271,285 (2.3)  | 60,413 (2.6)   | 0.0001         |
| Brain hemorrhage – no. (%)                                                  | 10,963 (0.5)   | 58,278 (0.5)   | 10,245 (0.4)   | 0.0001         |
| Ischemic stroke – no. (%)                                                   | 27,986 (1.3)   | 194,478 (1.7)  | 45,602 (2)     | 0.0001         |

|                                                                    |               |                |               |        |
|--------------------------------------------------------------------|---------------|----------------|---------------|--------|
|                                                                    |               |                |               |        |
| Metabolic syndrome & diabetes – no. (%)                            | 294,821 (14)  | 2,301,835 (20) | 465,353 (20)  | 0.0001 |
| Prediabetes – no. (%)                                              | 42,544 (2)    | 73,407 (0.6)   | 24,246 (1)    | 0.0001 |
| Bronchitis – no. (%)                                               | 65,265 (3)    | 429,230 (4)    | 131,343 (6)   | 0.0001 |
| Motor vehicle accidents – no. (%)                                  | 14,941 (0.7)  | 59,686 (0.5)   | 13,692 (0.6)  | 0.0001 |
| Overdose injury – no. (%)                                          | 10,933 (0.5)  | 40,226 (0.3)   | 12,147 (0.5)  | 0.0001 |
| Substance abuse – no. (%)                                          | 158,244 (7.6) | 974,856 (8.3)  | 109,305 (4.7) | 0.0001 |
| Anxiety disorders – no. (%)                                        | 131,426 (6.4) | 595,478 (5.2)  | 139,627 (6.1) | 0.0001 |
| Anxiety disorders (except social anxiety) – no. (%)                | 51,913 (2.5)  | 283,280 (2.4)  | 65,279 (2.8)  | 0.0016 |
| Bipolar disorders – no. (%)                                        | 52,348 (2.5)  | 287,735 (2.5)  | 61,411 (2.6)  | 0.0001 |
| Depressive disorders – no. (%)                                     | 213,851 (10)  | 827,932 (7)    | 190,083 (8)   | 0.0001 |
| Schizophrenia or other psychoses – no. (%)                         | 53,652 (2.6)  | 352,533 (3)    | 68,385 (2.9)  | 0.0001 |
| Positive symptoms of schizophrenia (i.e. hallucinations) – no. (%) | 2,653 (0.1)   | 9,482 (0.1)    | 3,531 (0.2)   | 0.0001 |
| Post-traumatic stress disorder – no. (%)                           | 28,582 (1.4)  | 75,608 (0.6)   | 17,101 (0.7)  | 0.0001 |
| Social anxiety disorder – no. (%)                                  | 295 (0.01)    | 1,090 (0.01)   | 135 (0.01)    | 0.0295 |
| Suicide – no. (%)                                                  | 4,957 (0.2)   | 15,646 (0.1)   | 4,407 (0.2)   | 0.0001 |
| Low offspring birthweight – no. (%)                                | 2,842 (0.1)   | 7,462 (0.1)    | 1,742 (0.1)   | 0.0002 |
| Maternal pregnancy complications – no. (%)                         | 39,343 (1.9)  | 144,353 (1.2)  | 40,938 (1.8)  | 0.0001 |
| Unemployment/low income – no. (%)                                  | 3,134 (0.2)   | 76,789 (0.7)   | 730 (0.03)    | 0.0001 |
| Nausea or vomiting – no. (%)                                       | 63,806 (3)    | 162,11(1.4)    | 58,706 (2.5)  | 0.0001 |
| Chronic pain – no. (%)                                             | 140,209 (6)   | 234,160 (2)    | 123,563 (5)   | 0.0001 |
| Spasticity – no. (%)                                               | 5,759 (0.3)   | 12,517 (0.1)   | 5,371 (0.2)   | 0.0001 |

|                                            |              |              |            |        |
|--------------------------------------------|--------------|--------------|------------|--------|
| Short-term sleep – no. (%)                 | 652 (0.03)   | 3,364 (0.03) | 357 (0.02) | 0.0001 |
| Tourette syndrome – no. (%)                | 428 (0.02)   | 2,784 (0.02) | 336 (0.01) | 0.0001 |
| Increased appetite & weight gain – no. (%) | 1,022 (0.05) | 3,017 (0.03) | 651 (0.03) | 0.0001 |

NAS = National Academy of Science. All NAS diagnoses listed had at least limited evidence of a statistical association with cannabis use based on the 2017 NAS summary statement. Substance abuse includes dependence or abuse of alcohol, tobacco, or other illicit drug. All variables pertain to the 2010-2014 period. Plus-minus values are means  $\pm$  SD. No. (%) indicates number of admissions with a specific demographic/lifestyle characteristic or NAS diagnosis (% of total admissions). A *P* value less than 0.05 is considered statistically significant.

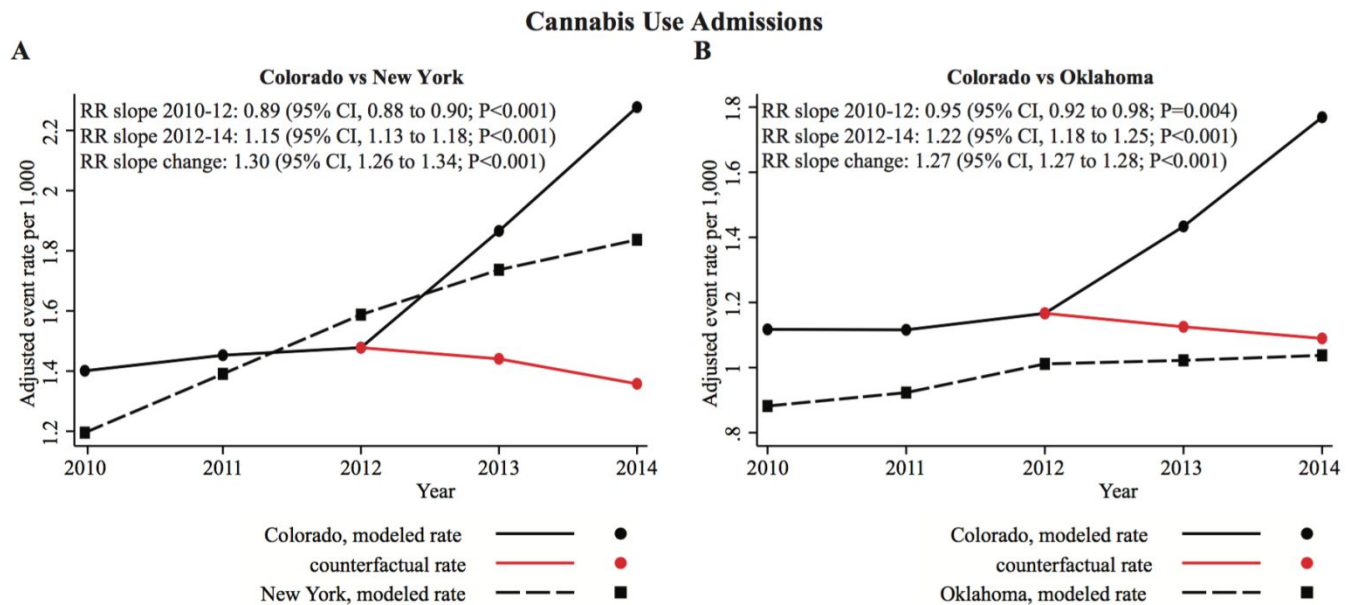

**Figure 1.** Multivariate adjusted rates of admissions for cannabis abuse over 2010-2014 in Colorado, site of implementation of the 2012 recreational cannabis legalization policy, compared with New York (A) and Oklahoma (B), control states without cannabis legalization. Red lines show the predicted rates of admissions for cannabis abuse had the cannabis legalization policy not been instituted. The comparison between Colorado and the control states with regards to change of risk ratio (RR) slope within the 2010-2012 period (pre-legalization) and 2012-2014 period (post-legalization), as well of the overall RR slope change, are also represented for the Colorado versus New York (A) and Colorado versus Oklahoma (B) comparisons. Red lines show the predicted rates of admissions for cannabis abuse had the cannabis legalization policy not been instituted. Each model was adjusted for age, gender, and race (see Methods section for further details). CI = confidence interval; vs = versus.

A

Admissions per 1,000 Population by Year

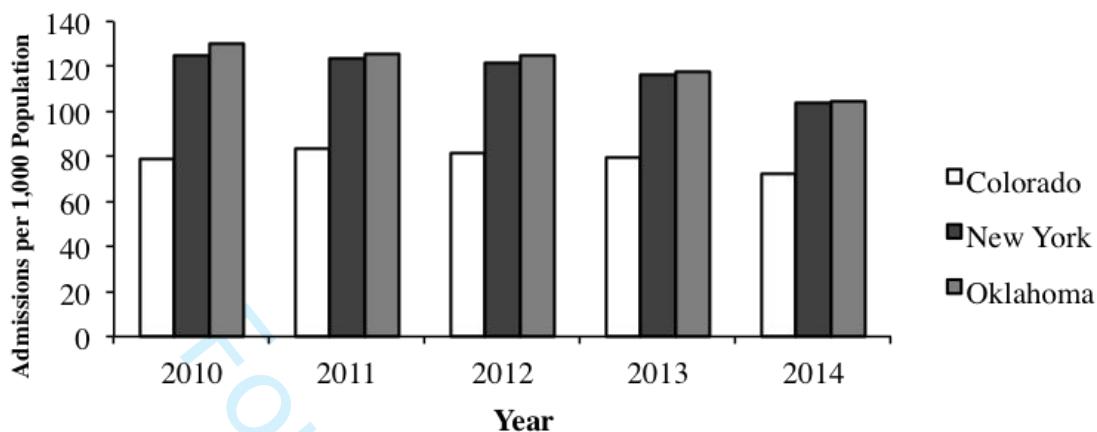

B

Median length of stay (LOS) by Year

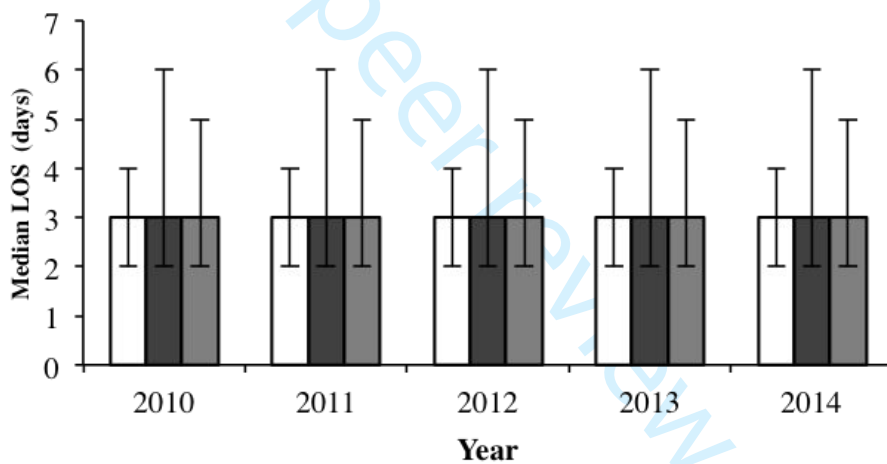

C

Median costs per person by Year

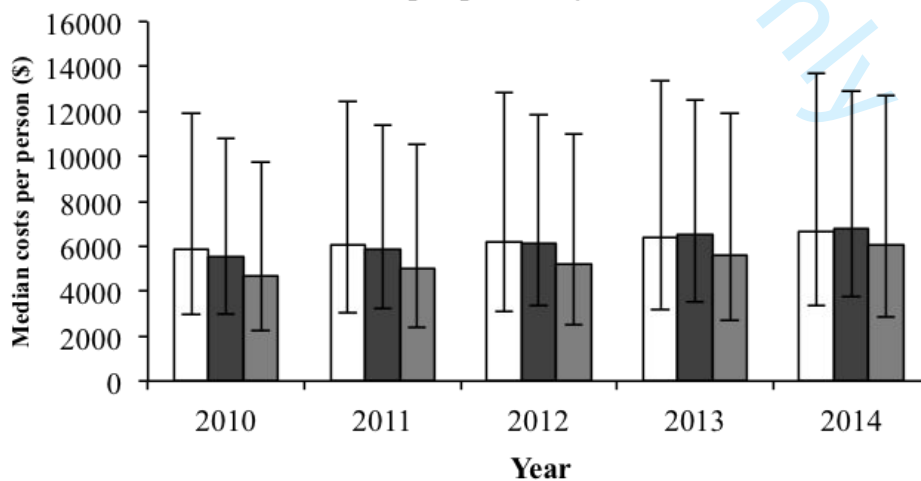

1  
2  
3 **Figure 2.** Healthcare utilization over 2010-2014 in Colorado, site of implementation of  
4 the 2012 recreational cannabis legalization policy, and in New York and Oklahoma,  
5 control states without cannabis legalization. The total number of admissions/1000  
6 population per year, the median length of stay per year, and the median costs per  
7 individual per year are shown in panels A, B, and C, respectively for the 3 states. Error  
8 bars denote interquartile ranges. LOS = length of stay.  
9  
10  
11  
12  
13  
14  
15  
16  
17  
18  
19  
20  
21  
22  
23  
24  
25  
26  
27  
28  
29  
30  
31  
32  
33  
34  
35  
36  
37  
38  
39  
40  
41  
42  
43  
44  
45  
46  
47  
48  
49  
50  
51  
52  
53  
54  
55  
56  
57  
58  
59  
60

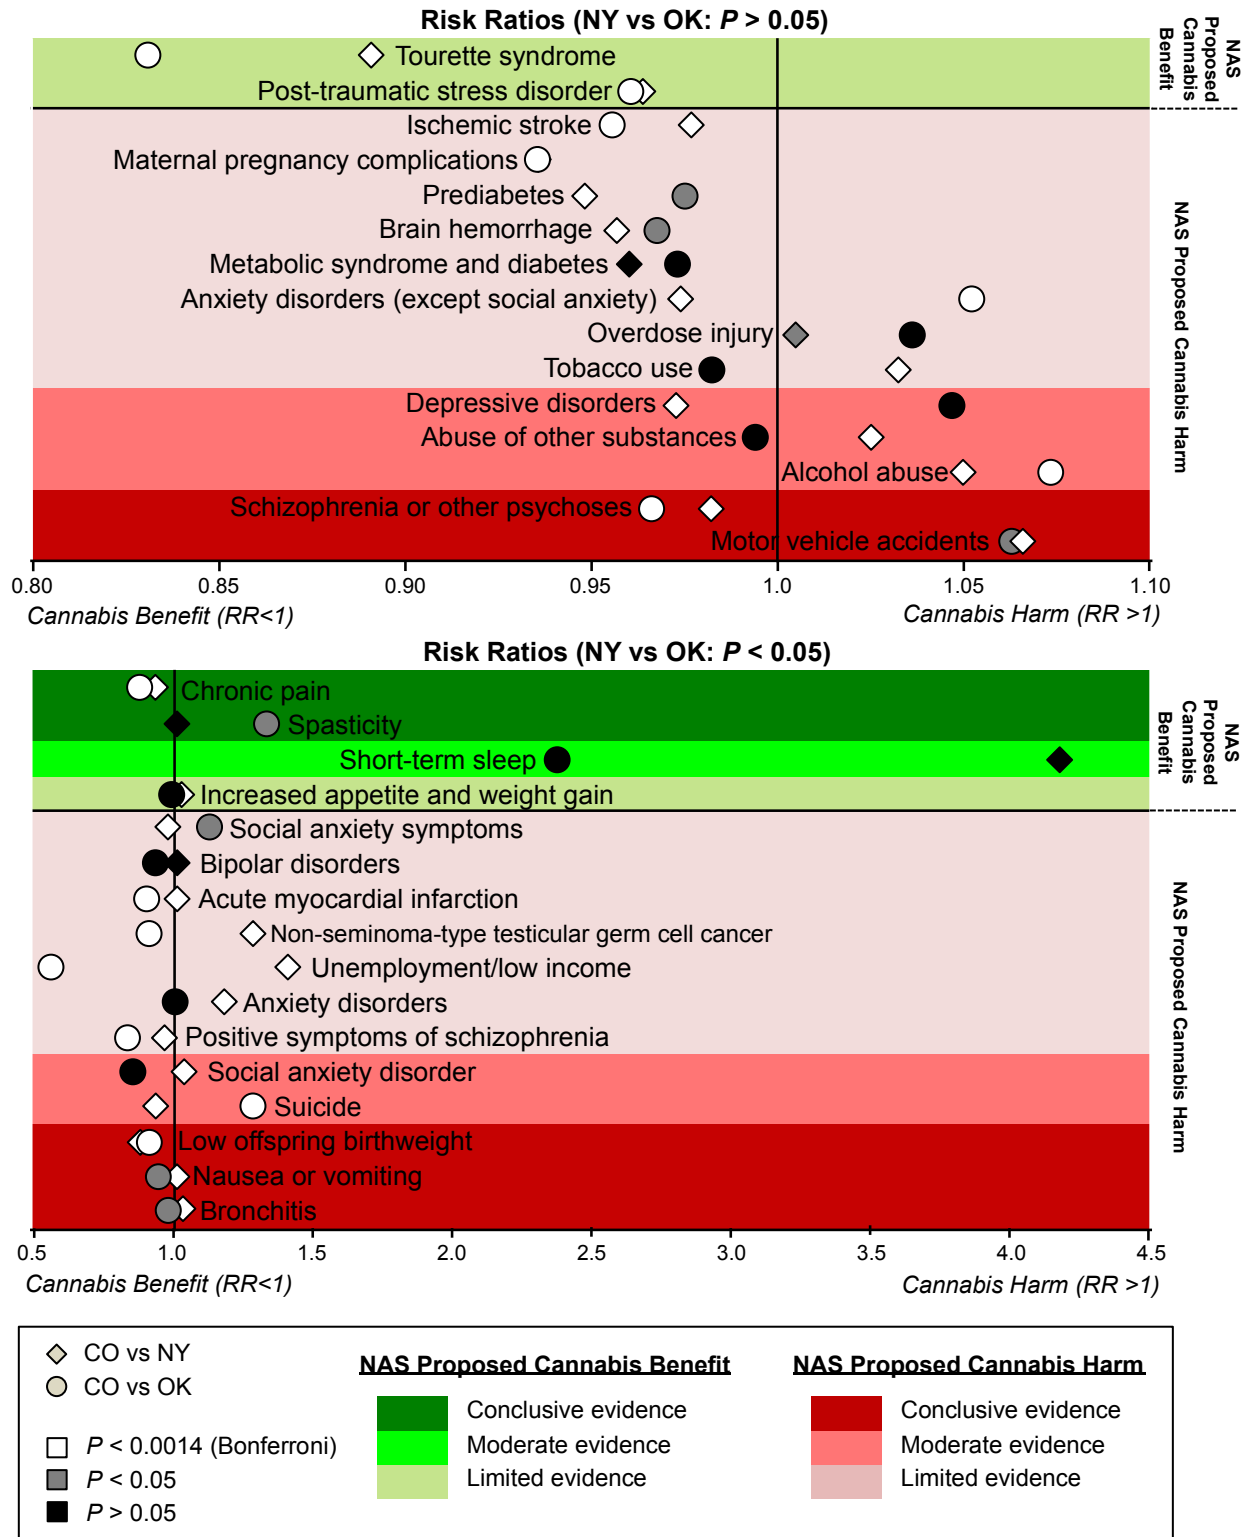

**Figure 3.** Health outcomes with at least limited evidence of a statistical association with cannabis use based on the National Academy of Science (NAS) summary statement.

1  
2  
3 Two main groups of medical diagnoses are identified based on a non-significant  
4  
5 ( $P>0.05$ ) (A) versus significant ( $P<0.05$ ) (B) comparison between New York (NY) and  
6  
7 Oklahoma (OK) (control states without cannabis legalization) with regards to the change  
8  
9 of admission rates for such diagnoses following cannabis legalization.  $P$  values for the  
10  
11 comparison between Colorado (CO) (site of cannabis legalization) and NY (rhomboid  
12  
13 symbol), or between CO and OK (circular symbol) are shown as either  $<0.0014$   
14  
15 (Bonferroni),  $<0.05$ , or  $>0.05$  using a gray scale for evidence of cannabis benefit (risk  
16  
17 ratio [RR]  $< 1$  shown on the left) and cannabis harm (RR $>1$  shown on the right).  
18  
19 Progressively darker shades of green or red indicate greater weight of evidence in the  
20  
21 direction of proposed benefit versus harm, respectively, by the NAS.  
22  
23  
24  
25  
26  
27  
28  
29  
30  
31  
32  
33  
34  
35  
36  
37  
38  
39  
40  
41  
42  
43  
44  
45  
46  
47  
48  
49  
50  
51  
52  
53  
54  
55  
56  
57  
58  
59  
60



## Supplementary Appendix

### Changes in Inpatient Healthcare Utilization after Legalization of Recreational Cannabis

Francesca N. Delling, MD, MPH;<sup>1</sup> Eric Vittinghoff, PhD;<sup>1</sup> Thomas A. Dewland, MD;<sup>2</sup> Mark J. Pletcher, MD, MPH;<sup>1</sup> Jeffrey E. Olgin, MD;<sup>1</sup> Gregory Nah, MA;<sup>1</sup> Kirstin Aschbacher, PhD;<sup>1</sup> Christina Fang, BA;<sup>1</sup> Emily S. Lee, BA;<sup>1</sup> Shannon M. Fan, BA;<sup>1</sup> Dhruv S. Kazi, MD, MS;<sup>1</sup> and Gregory M. Marcus, MD, MAS.<sup>1</sup>

<sup>1</sup>Department of Medicine, Division of Cardiology, University of California, San Francisco, San Francisco, CA, USA

<sup>2</sup>Knight Cardiovascular Institute, Oregon Health & Science University, Portland, OR, USA

#### Table of Contents

**eMethods.** Cost Analysis

**eTable 1.** Yearly costs and charges for the 3 study states

**eTable 2.** International Classification of Diseases-9<sup>th</sup> Edition (ICD-9) codes defining each medical diagnosis.

**eFigure 1-31.** Plots depicting admission rates for diagnoses classified based on weight of evidence from the National Academy of Science

This supplementary material has been provided by the authors to give readers additional information about their work.

## eMethods. Cost Analysis

### Cost Estimations

The inpatient cost for each hospitalization in New York and Colorado was estimated by multiplying the total charges (TOTCHG) obtained from HCUP State Inpatient Database with the institution-specific all-payer cost-to-charge ratio (APICC) obtained from the Cost-to-Charge Ratio file. Hospital ID was used as a linkage to merge both files. Total inpatient costs were calculated as the sum of the cost for all hospitalizations in a given state for a particular year. The databases contained 186,226 (8.7%) encounters with non-matched/missing hospital ID for NY and 1,132,696 (9.6%) encounters with non-matched/missing hospital ID for Colorado; for these encounters. In order to estimate the cost of these hospitalizations (for which we had charges but no cost-to-charge ratio) we applied the average cost-to-charge ratio for that state-year. This was estimated by dividing the sum of costs for all hospitalizations for which cost-to-charge ratios were available by the sum of charges for all hospitalizations for which cost-to-charge ratios were available in a given state-year (**Table S2**).

### Oklahoma Total Cost Estimate

HCUP does not produce SID and CCR file for Oklahoma. We obtained these data from Oklahoma State Department of Health – this dataset contains information about total charges but not cost-to-charge ratios. We estimated total inpatient costs in Oklahoma in two ways. First, we used a state-wide constant cost-to-charge ratio (0.3119) to estimate the total cost (ratio derived from the Institute for Health and Socio-Economic Policy calculations of federal cost reports). We then conducted a sensitivity analysis in which we used the average of the cost-to-charge ratios of New York and Colorado for any given state-year (**Table S2**).

**eTable 1. Yearly costs and charges for the 3 study states**

| <b>Colorado</b>                                                   | <b>2010</b>      | <b>2011</b>      | <b>2012</b>      | <b>2013</b>      | <b>2014</b>      | <b>2010 to 2014</b> |
|-------------------------------------------------------------------|------------------|------------------|------------------|------------------|------------------|---------------------|
| Total hospitalizations, n                                         | 397,505          | 428,912          | 424,640          | 418,952          | 418,900          | 2,088,909           |
| Hospitalizations for which CCR is available, n (%)                | 396,433 (99.7%)  | 301,586 (70.3%)  | 382,021 (90.0%)  | 412,483 (98.5%)  | 413,160 (98.6%)  | 1,905,683 (91.2%)   |
| Total charges for hospitalizations for which CCR is available     | \$14,382,791,648 | \$11,170,040,412 | \$15,821,232,608 | \$19,349,895,615 | \$20,370,018,114 | \$81,093,978,397    |
| Total costs for hospitalizations for which CCR is available       | \$4,104,443,164  | \$3,033,915,324  | \$3,963,892,093  | \$4,619,884,886  | \$4,700,380,255  | \$20,422,515,722    |
| Average CCR*                                                      | 0.2854           | 0.2716           | 0.2505           | 0.2388           | 0.2309           |                     |
| Hospitalizations for which CCR is not available, n (%)            | 1,072 (0.3%)     | 127,326 (29.7%)  | 42,619 (10.0%)   | 6,469 (1.5%)     | 5,740 (1.4%)     | 183,226 (8.8%)      |
| Total charges for hospitalizations for which CCR is not available | \$55,039,614     | \$5,704,285,087  | \$2,494,379,901  | \$241,011,451    | \$211,228,665    | \$8,705,944,718     |
| Total costs for hospitalizations for which CCR is not available†  | \$15,708,306     | \$1,549,283,830  | \$624,842,165    | \$57,553,535     | \$48,772,699     | \$2,296,160,534     |
| Total inpatient costs                                             | \$4,120,151,470  | \$4,583,199,154  | \$4,588,734,258  | \$4,677,438,421  | \$4,749,152,954  | \$22,718,676,256    |

\*Average CCR was estimated by dividing the total of costs for all hospitalizations for which cost-to-charge ratios were available by the total charges for hospitalizations for which cost-to-charge ratios were available in a given state-year.

†Total charges for hospitalization for which CCR is not available multiplied by Average CCR in a given state-year.

| <b>New York</b>                                                   | <b>2010</b>       | <b>2011</b>       | <b>2012</b>       | <b>2013</b>       | <b>2014</b>       | <b>2010 to 2014</b> |
|-------------------------------------------------------------------|-------------------|-------------------|-------------------|-------------------|-------------------|---------------------|
| Total hospitalizations, n                                         | 2,417,298         | 2,414,985         | 2,389,701         | 2,290,502         | 2,213,797         | 11,726,283          |
| Hospitalizations for which CCR is available, n (%)                | 2,189,513 (90.6%) | 2,157,629 (89.3%) | 2,168,880 (90.8%) | 2,056,367 (89.8%) | 2,021,199 (91.3%) | 10,593,588 (90.3%)  |
| Total charges for hospitalizations for which CCR is available     | \$66,303,900,691  | \$69,885,515,755  | \$74,728,795,811  | \$77,680,292,105  | \$79,252,368,106  | \$367,850,872,468   |
| Total costs for hospitalizations for which CCR is available       | \$22,376,381,374  | \$23,448,311,348  | \$24,539,963,919  | \$24,331,920,273  | \$23,892,478,440  | \$118,589,055,354   |
| Average CCR*                                                      | 0.3375            | 0.3355            | 0.3283            | 0.3132            | 0.3014            |                     |
| Hospitalizations for which CCR is not available, n (%)            | 227,785 (9.4%)    | 257,356 (10.7%)   | 220,821 (9.2%)    | 234,135 (10.2%)   | 192,598 (8.7%)    | 1,132,695 (9.7%)    |
| Total charges for hospitalizations for which CCR is not available | \$4,168,104,163   | \$4,821,903,339   | \$4,088,909,686   | \$5,687,320,556   | \$5,336,461,039   | \$24,102,698,783    |
| Total costs for hospitalizations for which CCR is not available†  | \$1,406,735,155   | \$1,617,748,571   | \$1,342,797,941   | \$1,781,268,798   | \$1,608,409,357   | \$7,756,959,821     |
| Total inpatient costs                                             | \$23,783,116,529  | \$25,066,059,919  | \$25,882,761,860  | \$26,113,189,071  | \$25,500,887,797  | \$126,346,015,175   |

\*Average CCR was estimated by dividing the total of costs for all hospitalizations for which cost-to-charge ratios were available by the total charges for hospitalizations for which cost-to-charge ratios were available in a given state-year.

†Total charges for hospitalization for which CCR is not available multiplied by Average CCR in a given state-year.

| <b>Oklahoma</b>                                               | <b>2010</b>      | <b>2011</b>      | <b>2012</b>      | <b>2013</b>      | <b>2014</b>      | <b>2010 to 2014</b> |
|---------------------------------------------------------------|------------------|------------------|------------------|------------------|------------------|---------------------|
| Total hospitalizations, n                                     | 489,724          | 476,605          | 476,728          | 452,724          | 439,207          | 2,334,988           |
| Hospitalizations for which CCR is available, n (%)            | 489724 (100%)    | 476605 (100%)    | 476728 (100%)    | 452724 (100%)    | 439207 (100%)    | 2334988 (100%)      |
| Total charges for hospitalizations for which CCR is available | \$13,927,214,520 | \$14,645,751,657 | \$15,247,598,300 | \$15,596,643,583 | \$15,003,967,132 | \$74,421,175,192    |
| Total costs for hospitalizations for which CCR is available   | \$4,343,898,209  | \$4,568,009,942  | \$4,755,725,910  | \$4,864,593,134  | \$5,001,131,977  | \$23,533,359,171    |
| Average CCR*                                                  | 0.3119           | 0.3119           | 0.3119           | 0.3119           | 0.3119           |                     |

\*Statewide constant CCR (0.3119) used to estimate the total cost across years.

| <b>Oklahoma (sensitivity analysis)</b>                       | <b>2010</b>      | <b>2011</b>      | <b>2012</b>      | <b>2013</b>      | <b>2014</b>      | <b>2010 to 2014</b> |
|--------------------------------------------------------------|------------------|------------------|------------------|------------------|------------------|---------------------|
| Total hospitalization, n                                     | 489,724          | 476,605          | 476,728          | 452,724          | 439,207          | 2,334,988           |
| Hospitalization for which CCR is available, n (%)            | 489724 (100%)    | 476605 (100%)    | 476728 (100%)    | 452724 (100%)    | 439207 (100%)    | 2334988 (100%)      |
| Total charges for hospitalization for which CCR is available | \$13,927,214,520 | \$14,645,751,657 | \$15,247,598,300 | \$15,596,643,583 | \$15,003,967,132 | \$74,421,175,192    |
| Total costs for hospitalization for which CCR is available   | \$4,337,630,962  | \$4,445,717,915  | \$4,413,417,328  | \$4,304,673,629  | \$4,267,557,794  | \$21,768,997,628    |
| Average CCR*                                                 | 0.3114           | 0.3036           | 0.2895           | 0.276            | 0.2662           |                     |

\*Average of the CCRs of New York and Colorado for any given state-year.

**eTable 2. International Classification of Diseases-9<sup>th</sup> Edition (ICD-9) codes defining each medical diagnosis.**

**Chronic pain**

| ICD-9 Code | Short Description              | Long Description                 |
|------------|--------------------------------|----------------------------------|
| 338.21     | Chronic pain d/t trauma        | Chronic pain due to trauma       |
| 338.22     | Chronic post-thoracotomy pain  | Chronic post-thoracotomy pain    |
| 338.28     | Chronic postoperative pain NEC | Other chronic postoperative pain |
| 338.29     | Chronic pain NEC               | Other chronic pain               |
| 338.4      | Chronic pain syndrome          | Chronic pain syndrome            |

**Nausea or vomiting**

| ICD-9 Code | Short Description    | Long Description     |
|------------|----------------------|----------------------|
| 787.03     | Vomiting alone       | Vomiting alone       |
| 787.02     | Nausea alone         | Nausea alone         |
| 787.01     | Nausea with vomiting | Nausea with vomiting |

**Spasticity**

| ICD-9 Code | Short Description | Long Description |
|------------|-------------------|------------------|
| 728.85     | Spasm of muscle   | Spasm of muscle  |

**Short-term sleep disorders**

| ICD-9 Code | Short Description             | Long Description                                         |
|------------|-------------------------------|----------------------------------------------------------|
| 307.4      | Nonorganic sleep disorder NOS | Nonorganic sleep disorder, unspecified                   |
| 307.41     | Transient insomnia            | Transient disorder of initiating or maintaining sleep    |
| 307.42     | Persistent insomnia           | Persistent disorder of initiating or maintaining sleep   |
| 307.45     | Nonorganic circadian rhythm   | Circadian rhythm sleep disorder of nonorganic origin     |
| 307.47     | Sleep stage dysfunction NEC   | Other dysfunctions of sleep stages or arousal from sleep |

|        |                          |                                                        |
|--------|--------------------------|--------------------------------------------------------|
| 307.49 | Nonorganic sleep dis NEC | Other specific disorders of sleep of nonorganic origin |
|--------|--------------------------|--------------------------------------------------------|

### Increased appetite and weight gain

| ICD-9 Code | Short Description    | Long Description     |
|------------|----------------------|----------------------|
| 783.1      | Abnormal weight gain | Abnormal weight gain |
| 783.6      | Polyphagia           | Polyphagia           |

### Tourette's syndrome

| ICD-9 Code | Short Description   | Long Description    |
|------------|---------------------|---------------------|
| 307.23     | Tourette's disorder | Tourette's disorder |

### Posttraumatic stress disorder

| ICD-9 Code | Short Description        | Long Description              |
|------------|--------------------------|-------------------------------|
| 309.81     | Posttraumatic stress dis | Posttraumatic stress disorder |

### Non-seminoma-type testicular germ cell cancer

| ICD-9 Code | Short Description    | Long Description                                   |
|------------|----------------------|----------------------------------------------------|
| 186.9      | Malig neo testis NEC | Malignant neoplasm of other and unspecified testis |

### Acute myocardial infarction

| ICD-9 Code | Short Description        | Long Description                                                                |
|------------|--------------------------|---------------------------------------------------------------------------------|
| 410        | AMI anterolateral,unspec | Acute myocardial infarction of anterolateral wall, episode of care unspecified  |
| 410.01     | AMI anterolateral, init  | Acute myocardial infarction of anterolateral wall, initial episode of care      |
| 410.02     | AMI anterolateral,subseq | Acute myocardial infarction of anterolateral wall, subsequent episode of care   |
| 410.1      | AMI anterior wall,unspec | Acute myocardial infarction of other anterior wall, episode of care unspecified |
| 410.11     | AMI anterior wall, init  | Acute myocardial infarction of other anterior wall,                             |

|        |                          |                                                                                  |
|--------|--------------------------|----------------------------------------------------------------------------------|
|        |                          | initial episode of care                                                          |
| 410.12 | AMI anterior wall,subseq | Acute myocardial infarction of other anterior wall, subsequent episode of care   |
| 410.2  | AMI inferolateral,unspec | Acute myocardial infarction of inferolateral wall, episode of care unspecified   |
| 410.21 | AMI inferolateral, init  | Acute myocardial infarction of inferolateral wall, initial episode of care       |
| 410.22 | AMI inferolateral,subseq | Acute myocardial infarction of inferolateral wall, subsequent episode of care    |
| 410.3  | AMI inferopost, unspec   | Acute myocardial infarction of inferoposterior wall, episode of care unspecified |
| 410.31 | AMI inferopost, initial  | Acute myocardial infarction of inferoposterior wall, initial episode of care     |
| 410.32 | AMI inferopost, subseq   | Acute myocardial infarction of inferoposterior wall, subsequent episode of care  |
| 410.4  | AMI inferior wall,unspec | Acute myocardial infarction of other inferior wall, episode of care unspecified  |
| 410.41 | AMI inferior wall, init  | Acute myocardial infarction of other inferior wall, initial episode of care      |
| 410.42 | AMI inferior wall,subseq | Acute myocardial infarction of other inferior wall, subsequent episode of care   |
| 410.5  | AMI lateral NEC, unspec  | Acute myocardial infarction of other lateral wall, episode of care unspecified   |
| 410.51 | AMI lateral NEC, initial | Acute myocardial infarction of other lateral wall, initial episode of care       |
| 410.52 | AMI lateral NEC, subseq  | Acute myocardial infarction of other lateral wall, subsequent episode of care    |
| 410.6  | True post infarct,unspec | True posterior wall infarction, episode of care unspecified                      |
| 410.61 | True post infarct, init  | True posterior wall infarction, initial episode of care                          |
| 410.62 | True post infarct,subseq | True posterior wall infarction, subsequent episode of care                       |
| 410.7  | Subendo infarct, unspec  | Subendocardial infarction, episode of care unspecified                           |
| 410.71 | Subendo infarct, initial | Subendocardial infarction, initial episode of care                               |
| 410.72 | Subendo infarct, subseq  | Subendocardial infarction, subsequent episode of                                 |



|        |                      |                                                                                   |
|--------|----------------------|-----------------------------------------------------------------------------------|
|        |                      | care                                                                              |
| 410.8  | AMI NEC, unspecified | Acute myocardial infarction of other specified sites, episode of care unspecified |
| 410.81 | AMI NEC, initial     | Acute myocardial infarction of other specified sites, initial episode of care     |
| 410.82 | AMI NEC, subsequent  | Acute myocardial infarction of other specified sites, subsequent episode of care  |
| 410.9  | AMI NOS, unspecified | Acute myocardial infarction of unspecified site, episode of care unspecified      |
| 410.91 | AMI NOS, initial     | Acute myocardial infarction of unspecified site, initial episode of care          |
| 410.92 | AMI NOS, subsequent  | Acute myocardial infarction of unspecified site, subsequent episode of care       |

### Ischemic stroke

| ICD-9 Code | Short Description        | Long Description                                                                               |
|------------|--------------------------|------------------------------------------------------------------------------------------------|
| 435.8      | Trans cereb ischemia NEC | Other specified transient cerebral ischemias                                                   |
| 435.9      | Trans cereb ischemia NOS | Unspecified transient cerebral ischemia                                                        |
| 433.01     | Ocl bsrlr art w infrc    | Occlusion and stenosis of basilar artery with cerebral infarction                              |
| 433.11     | Ocl crtd art w infrc     | Occlusion and stenosis of carotid artery with cerebral infarction                              |
| 433.21     | Ocl vrtb art w infrc     | Occlusion and stenosis of vertebral artery with cerebral infarction                            |
| 433.31     | Ocl mlt bi art w infrc   | Occlusion and stenosis of multiple and bilateral precerebral arteries with cerebral infarction |
| 433.81     | Ocl spcf art w infrc     | Occlusion and stenosis of other specified precerebral artery with cerebral infarction          |
| 433.91     | Ocl art NOS w infrc      | Occlusion and stenosis of unspecified precerebral artery with cerebral infarction              |
| 434.91     | Crbl art ocl NOS w infrc | Cerebral artery occlusion, unspecified with cerebral infarction                                |

### Brain hemorrhage

| ICD-9 Code | Short Description | Long Description |
|------------|-------------------|------------------|
|------------|-------------------|------------------|

|       |                          |                                     |
|-------|--------------------------|-------------------------------------|
| 430   | Subarachnoid hemorrhage  | Subarachnoid hemorrhage             |
| 431   | Intracerebral hemorrhage | Intracerebral hemorrhage            |
| 432   | Nontraum extradural hem  | Nontraumatic extradural hemorrhage  |
| 432.1 | Subdural hemorrhage      | Subdural hemorrhage                 |
| 432.9 | Intracranial hemorr NOS  | Unspecified intracranial hemorrhage |

### Metabolic syndrome and diabetes

| ICD-9 Code | Short Description        | Long Description                                                                                           |
|------------|--------------------------|------------------------------------------------------------------------------------------------------------|
| 277.7      | Dysmetabolic syndrome x  | Dysmetabolic syndrome X                                                                                    |
| 250        | DMII wo cmp nt st uncntr | Diabetes mellitus without mention of complication, type II or unspecified type, not stated as uncontrolled |
| 250.02     | DMII wo cmp uncntrld     | Diabetes mellitus without mention of complication, type II or unspecified type, uncontrolled               |
| 250.1      | DMII keto nt st uncntrld | Diabetes with ketoacidosis, type II or unspecified type, not stated as uncontrolled                        |
| 250.12     | DMII ketoacd uncntrld    | Diabetes with ketoacidosis, type II or unspecified type, uncontrolled                                      |
| 250.2      | DMII hprsm nt st uncntrl | Diabetes with hyperosmolarity, type II or unspecified type, not stated as uncontrolled                     |
| 250.22     | DMII hprosmldr uncntrld  | Diabetes with hyperosmolarity, type II or unspecified type, uncontrolled                                   |
| 250.3      | DMII o cm nt st uncntrld | Diabetes with other coma, type II or unspecified type, not stated as uncontrolled                          |
| 250.32     | DMII oth coma uncntrld   | Diabetes with other coma, type II or unspecified type, uncontrolled                                        |
| 250.4      | DMII renl nt st uncntrld | Diabetes with renal manifestations, type II or unspecified type, not stated as uncontrolled                |
| 250.42     | DMII renal uncntrld      | Diabetes with renal manifestations, type II or unspecified type, uncontrolled                              |
| 250.5      | DMII ophth nt st uncntrl | Diabetes with ophthalmic manifestations, type II or unspecified type, not stated as uncontrolled           |
| 250.52     | DMII ophth uncntrld      | Diabetes with ophthalmic manifestations, type II or unspecified type, uncontrolled                         |

|        |                         |                                                                                                         |
|--------|-------------------------|---------------------------------------------------------------------------------------------------------|
| 250.6  | DMII neuro nt st unctrl | Diabetes with neurological manifestations, type II or unspecified type, not stated as uncontrolled      |
| 250.62 | DMII neuro unctrl       | Diabetes with neurological manifestations, type II or unspecified type, uncontrolled                    |
| 250.7  | DMII circ nt st unctrl  | Diabetes with peripheral circulatory disorders, type II or unspecified type, not stated as uncontrolled |
| 250.72 | DMII circ unctrl        | Diabetes with peripheral circulatory disorders, type II or unspecified type, uncontrolled               |
| 250.8  | DMII oth nt st unctrl   | Diabetes with other specified manifestations, type II or unspecified type, not stated as uncontrolled   |
| 250.82 | DMII oth unctrl         | Diabetes with other specified manifestations, type II or unspecified type, uncontrolled                 |
| 250.9  | DMII unspf nt st unctrl | Diabetes with unspecified complication, type II or unspecified type, not stated as uncontrolled         |
| 250.92 | DMII unspf unctrl       | Diabetes with unspecified complication, type II or unspecified type, uncontrolled                       |

### Prediabetes

| ICD-9 Code | Short Description    | Long Description       |
|------------|----------------------|------------------------|
| 790.29     | Abnormal glucose NEC | Other abnormal glucose |

### Bronchitis

| ICD-9 Code | Short Description        | Long Description                                         |
|------------|--------------------------|----------------------------------------------------------|
| 466        | Acute bronchitis         | Acute bronchitis                                         |
| 490        | Bronchitis NOS           | Bronchitis, not specified as acute or chronic            |
| 491        | Simple chr bronchitis    | Simple chronic bronchitis                                |
| 491.1      | Mucopurul chr bronchitis | Mucopurulent chronic bronchitis                          |
| 491.2      | Obst chr bronc w/o exac  | Obstructive chronic bronchitis without exacerbation      |
| 491.21     | Obs chr bronc w(ac) exac | Obstructive chronic bronchitis with (acute) exacerbation |
| 491.22     | Obs chr bronc w ac bronc | Obstructive chronic bronchitis with acute bronchitis     |

|       |                        |                                |
|-------|------------------------|--------------------------------|
| 491.8 | Chronic bronchitis NEC | Other chronic bronchitis       |
| 491.9 | Chronic bronchitis NOS | Unspecified chronic bronchitis |

### Motor vehicle accidents

| ICD-9 Code | Short Description       | Long Description                                                                                                                       |
|------------|-------------------------|----------------------------------------------------------------------------------------------------------------------------------------|
| E812.0     | Mv collision NOS-driver | Other motor vehicle traffic accident involving collision with motor vehicle injuring driver of motor vehicle other than motorcycle     |
| E812.1     | Mv collision NOS-pasngr | Other motor vehicle traffic accident involving collision with motor vehicle injuring passenger in motor vehicle other than motorcycle  |
| E812.2     | Mv collis NOS-motorcycl | Other motor vehicle traffic accident involving collision with motor vehicle injuring motorcyclist                                      |
| E812.3     | Mv coll NOS-mcycl psngr | Other motor vehicle traffic accident involving collision with motor vehicle injuring passenger on motorcycle                           |
| E812.4     | Mv collision NOS-st car | Other motor vehicle traffic accident involving collision with motor vehicle injuring occupant of streetcar                             |
| E812.5     | Mv coll NOS-anim rid    | Other motor vehicle traffic accident involving collision with motor vehicle injuring rider of animal; occupant of animal-drawn vehicle |
| E812.6     | Mv coll NOS-ped cycl    | Other motor vehicle traffic accident involving collision with motor vehicle injuring pedal cyclist                                     |
| E812.7     | Mv collision NOS-pedest | Other motor vehicle traffic accident involving collision with motor vehicle injuring pedestrian                                        |
| E812.8     | Mv collis NOS-pers NEC  | Other motor vehicle traffic accident involving collision with motor vehicle injuring other specified person                            |
| E812.9     | Mv collis NOS-pers NOS  | Other motor vehicle traffic accident involving collision with motor vehicle injuring unspecified person                                |
| E813.0     | Mv-oth veh coll-driver  | Motor vehicle traffic accident involving collision with other vehicle injuring driver of motor vehicle other than motorcycle           |
| E813.1     | Mv-oth veh coll-pasngr  | Motor vehicle traffic accident involving collision with other vehicle injuring passenger in motor vehicle other than motorcycle        |
| E813.2     | Mv-oth veh coll-motcycl | Motor vehicle traffic accident involving collision                                                                                     |

|        |                          |                                                                                                                                  |
|--------|--------------------------|----------------------------------------------------------------------------------------------------------------------------------|
|        |                          | with other vehicle injuring motorcyclist                                                                                         |
| E813.3 | Mv-oth veh coll-mcyc psg | Motor vehicle traffic accident involving collision with other vehicle injuring passenger on motorcycle                           |
| E813.4 | Mv-oth veh coll-st car   | Motor vehicle traffic accident involving collision with other vehicle injuring occupant of streetcar                             |
| E813.5 | Mv-oth veh coll-anim rid | Motor vehicle traffic accident involving collision with other vehicle injuring rider of animal; occupant of animal-drawn vehicle |
| E813.6 | Mv-oth veh coll-ped cycl | Motor vehicle traffic accident involving collision with other vehicle injuring pedal cyclist                                     |
| E813.7 | Mv-oth veh coll-pedest   | Motor vehicle traffic accident involving collision with other vehicle injuring pedestrian                                        |
| E813.8 | Mv-oth veh coll-pers NEC | Motor vehicle traffic accident involving collision with other vehicle injuring other specified person                            |
| E813.9 | Mv-oth veh coll-pers NOS | Motor vehicle traffic accident involving collision with other vehicle injuring unspecified person                                |
| E814.0 | Mv coll w pedest-driver  | Motor vehicle traffic accident involving collision with pedestrian injuring driver of motor vehicle other than motorcycle        |
| E814.1 | Mv coll w pedest-pasngr  | Motor vehicle traffic accident involving collision with pedestrian injuring passenger in motor vehicle other than motorcycle     |
| E814.2 | Mv coll w pedest-motcycl | Motor vehicle traffic accident involving collision with pedestrian injuring motorcyclist                                         |
| E814.3 | Mv coll w ped-mcycl psg  | Motor vehicle traffic accident involving collision with pedestrian injuring passenger on motorcycle                              |
| E814.4 | Mv coll w pedest-st car  | Motor vehicle traffic accident involving collision with pedestrian injuring occupant of streetcar                                |
| E814.5 | Mv coll w ped-anim rid   | Motor vehicle traffic accident involving collision with pedestrian injuring rider of animal; occupant of animal drawn vehicle    |
| E814.6 | Mv coll w ped-ped cycl   | Motor vehicle traffic accident involving collision with pedestrian injuring pedal cyclist                                        |
| E814.7 | Mv coll w pedest-pedest  | Motor vehicle traffic accident involving collision with pedestrian injuring pedestrian                                           |
| E814.8 | Mv coll w pedes-pers NEC | Motor vehicle traffic accident involving collision with pedestrian injuring other specified person                               |

|        |                          |                                                                                                                                                    |
|--------|--------------------------|----------------------------------------------------------------------------------------------------------------------------------------------------|
| E814.9 | Mv coll w pedes-pers NOS | Motor vehicle traffic accident involving collision with pedestrian injuring unspecified person                                                     |
| E815.0 | Mv coll w oth obj-driver | Other motor vehicle traffic accident involving collision on the highway injuring driver of motor vehicle other than motorcycle                     |
| E815.1 | Mv coll w oth obj-pasngr | Other motor vehicle traffic accident involving collision on the highway injuring passenger in motor vehicle other than motorcycle                  |
| E815.2 | Mv coll w oth obj-mocycl | Other motor vehicle traffic accident involving collision on the highway injuring motorcyclist                                                      |
| E815.3 | Mv coll w obj-mcycl psgr | Other motor vehicle traffic accident involving collision on the highway injuring passenger on motorcycle                                           |
| E815.4 | Mv coll w obj-st car     | Other motor vehicle traffic accident involving collision on the highway injuring occupant of streetcar                                             |
| E815.5 | Mv coll w obj-anim rider | Other motor vehicle traffic accident involving collision on the highway injuring rider of animal; occupant of animal-drawn vehicle                 |
| E815.6 | Mv coll w obj-ped cycl   | Other motor vehicle traffic accident involving collision on the highway injuring pedal cyclist                                                     |
| E815.7 | Mv coll w obj-pedest     | Other motor vehicle traffic accident involving collision on the highway injuring pedestrian                                                        |
| E815.8 | Mv coll w obj-pers NEC   | Other motor vehicle traffic accident involving collision on the highway injuring other specified person                                            |
| E815.9 | Mv coll w obj-pers NOS   | Other motor vehicle traffic accident involving collision on the highway injuring unspecified person                                                |
| E816.0 | Loss control mv acc-driv | Motor vehicle traffic accident due to loss of control, without collision on the highway, injuring driver of motor vehicle other than motorcycle    |
| E816.1 | Loss control mv acc-psgr | Motor vehicle traffic accident due to loss of control, without collision on the highway, injuring passenger in motor vehicle other than motorcycle |
| E816.2 | Loss control mv-mocycl   | Motor vehicle traffic accident due to loss of control, without collision on the highway, injuring motorcyclist                                     |
| E816.3 | Loss control mv-mcyc psg | Motor vehicle traffic accident due to loss of control, without collision on the highway, injuring passenger on motorcycle                          |

|        |                          |                                                                                                                                                     |
|--------|--------------------------|-----------------------------------------------------------------------------------------------------------------------------------------------------|
| E816.4 | Loss cont mv acc-st car  | Motor vehicle traffic accident due to loss of control, without collision on the highway, injuring occupant of streetcar                             |
| E816.5 | Loss cont mv-anim rider  | Motor vehicle traffic accident due to loss of control, without collision on the highway, injuring rider of animal; occupant of animal-drawn vehicle |
| E816.6 | Loss control mv-ped cycl | Motor vehicle traffic accident due to loss of control, without collision on the highway, injuring pedal cyclist                                     |
| E816.7 | Loss control mv-pedest   | Motor vehicle traffic accident due to loss of control, without collision on the highway, injuring pedestrian                                        |
| E816.8 | Loss control mv-pers NEC | Motor vehicle traffic accident due to loss of control, without collision on the highway, injuring other specified person                            |
| E816.9 | Loss control mv-pers NOS | Motor vehicle traffic accident due to loss of control, without collision on the highway, injuring unspecified person                                |
| E819.0 | Traffic acc NOS-driver   | Motor vehicle traffic accident of unspecified nature injuring driver of motor vehicle other than motorcycle                                         |
| E819.1 | Traffic acc NOS-pasngr   | Motor vehicle traffic accident of unspecified nature injuring passenger in motor vehicle other than motorcycle                                      |
| E819.2 | Traffic acc NOS-motcycl  | Motor vehicle traffic accident of unspecified nature injuring motorcyclist                                                                          |
| E819.3 | Traff acc NOS-mcycl psgr | Motor vehicle traffic accident of unspecified nature injuring passenger on motorcycle                                                               |
| E819.4 | Traffic acc NOS-st car   | Motor vehicle traffic accident of unspecified nature injuring occupant of streetcar                                                                 |
| E819.5 | Traff acc NOS-anim rider | Motor vehicle traffic accident of unspecified nature injuring rider of animal; occupant of animal-drawn vehicle                                     |
| E819.6 | Traffic acc NOS-ped cycl | Motor vehicle traffic accident of unspecified nature injuring pedal cyclist                                                                         |
| E819.7 | Traffic acc NOS-pedest   | Motor vehicle traffic accident of unspecified nature injuring pedestrian                                                                            |
| E819.8 | Traffic acc NOS-pers NEC | Motor vehicle traffic accident of unspecified nature injuring other specified person                                                                |
| E819.9 | Traffic acc NOS-pers NOS | Motor vehicle traffic accident of unspecified nature injuring unspecified person                                                                    |

**Overdose injuries**

| ICD-9 Code | Short Description       | Long Description                                                                       |
|------------|-------------------------|----------------------------------------------------------------------------------------|
| E950.0     | Poison-analgesics       | Suicide and self-inflicted poisoning by analgesics, antipyretics, and antirheumatics   |
| E950.1     | Poison-barbiturates     | Suicide and self-inflicted poisoning by barbiturates                                   |
| E950.2     | Poison-sedat/hypnotic   | Suicide and self-inflicted poisoning by other sedatives and hypnotics                  |
| E950.3     | Poison-psychotropic agt | Suicide and self-inflicted poisoning by tranquilizers and other psychotropic agents    |
| E950.4     | Poison-drug/medicin NEC | Suicide and self-inflicted poisoning by other specified drugs and medicinal substances |
| E950.5     | Poison-drug/medicin NOS | Suicide and self-inflicted poisoning by unspecified drug or medicinal substance        |

**Assault-based gunshot injuries**

| ICD-9 Code | Short Description       | Long Description                         |
|------------|-------------------------|------------------------------------------|
| E965.0     | Assault-handgun         | Assault by handgun                       |
| E965.1     | Assault-shotgun         | Assault by shotgun                       |
| E965.2     | Assault-hunting rifle   | Assault by hunting rifle                 |
| E965.3     | Assault-military weapon | Assault by military firearms             |
| E965.4     | Assault-firearm NEC     | Assault by other and unspecified firearm |

**Low offspring birthweight**

| ICD-9 Code | Short Description       | Long Description                                            |
|------------|-------------------------|-------------------------------------------------------------|
| 764.9      | Fet growth retard wtNOS | Fetal growth retardation, unspecified, unspecified [weight] |
| 764.91     | Fet growth retard <500g | Fetal growth retardation, unspecified, less than 500 grams  |
| 764.92     | Fet growth ret 500-749g | Fetal growth retardation, unspecified, 500-749 grams        |
| 764.93     | Fet growth ret 750-999g | Fetal growth retardation, unspecified, 750-999 grams        |



|        |                          |                                                             |
|--------|--------------------------|-------------------------------------------------------------|
| 764.94 | Fet grwth ret 1000-1249g | Fetal growth retardation, unspecified, 1,000-1,249 grams    |
| 764.95 | Fet grwth ret 1250-1499g | Fetal growth retardation, unspecified, 1,250-1,499 grams    |
| 764.96 | Fet grwth ret 1500-1749g | Fetal growth retardation, unspecified, 1,500-1,749 grams    |
| 764.97 | Fet grwth ret 1750-1999g | Fetal growth retardation, unspecified, 1,750-1,999 grams    |
| 764.98 | Fet grwth ret 2000-2499g | Fetal growth retardation, unspecified, 2,000-2,499 grams    |
| 764.99 | Fet growth ret 2500+g    | Fetal growth retardation, unspecified, 2,500 grams and over |

### Maternal pregnancy complications

| ICD-9 Code | Short Description        | Long Description                                                                                          |
|------------|--------------------------|-----------------------------------------------------------------------------------------------------------|
| 640.8      | Hem early preg NEC-unsp  | Other specified hemorrhage in early pregnancy, unspecified as to episode of care or not applicable        |
| 640.81     | Hem early preg NEC-deliv | Other specified hemorrhage in early pregnancy, delivered, with or without mention of antepartum condition |
| 640.83     | Hem early pg NEC-anteper | Other specified hemorrhage in early pregnancy, antepartum condition or complication                       |
| 640.9      | Hemorr early preg-unspec | Unspecified hemorrhage in early pregnancy, unspecified as to episode of care or not applicable            |
| 640.91     | Hem early preg-delivered | Unspecified hemorrhage in early pregnancy, delivered, with or without mention of antepartum condition     |
| 640.93     | Hem early preg-anteper   | Unspecified hemorrhage in early pregnancy, antepartum condition or complication                           |
| 641        | Placenta previa-unspec   | Placenta previa without hemorrhage, unspecified as to episode of care or not applicable                   |
| 641.01     | Placenta previa-deliver  | Placenta previa without hemorrhage, delivered, with or without mention of antepartum condition            |
| 641.03     | Placenta previa-anteper  | Placenta previa without hemorrhage, antepartum condition or complication                                  |
| 641.1      | Placenta prev hem-unspec | Hemorrhage from placenta previa, unspecified as to episode of care or not applicable                      |

|        |                          |                                                                                                                                                  |
|--------|--------------------------|--------------------------------------------------------------------------------------------------------------------------------------------------|
| 641.11 | Placenta prev hem-deliv  | Hemorrhage from placenta previa, delivered, with or without mention of antepartum condition                                                      |
| 641.13 | Placen prev hem-antepart | Hemorrhage from placenta previa, antepartum condition or complication                                                                            |
| 641.2  | Prem separ placen-unspec | Premature separation of placenta, unspecified as to episode of care or not applicable                                                            |
| 641.21 | Prem separ placen-deliv  | Premature separation of placenta, delivered, with or without mention of antepartum condition                                                     |
| 641.23 | Prem separ plac-antepart | Premature separation of placenta, antepartum condition or complication                                                                           |
| 642    | Essen hyperten preg-unsp | Benign essential hypertension complicating pregnancy, childbirth, and the puerperium, unspecified as to episode of care or not applicable        |
| 642.01 | Essen hyperten-delivered | Benign essential hypertension complicating pregnancy, childbirth, and the puerperium, delivered, with or without mention of antepartum condition |
| 642.02 | Essen hyperten-del w p/p | Benign essential hypertension, complicating pregnancy, childbirth, and the puerperium, delivered, with mention of postpartum complication        |
| 642.03 | Essen hyperten-antepart  | Benign essential hypertension complicating pregnancy, childbirth, and the puerperium, antepartum condition or complication                       |
| 642.04 | Essen hyperten-postpart  | Benign essential hypertension complicating pregnancy, childbirth, and the puerperium, postpartum condition or complication                       |
| 642.3  | Trans hyperten preg-unsp | Transient hypertension of pregnancy, unspecified as to episode of care or not applicable                                                         |
| 642.31 | Trans hyperten-delivered | Transient hypertension of pregnancy, delivered, with or without mention of antepartum condition                                                  |
| 642.32 | Trans hyperten-del w p/p | Transient hypertension of pregnancy, delivered, with mention of postpartum complication                                                          |
| 642.33 | Trans hyperten-antepart  | Transient hypertension of pregnancy, antepartum condition or complication                                                                        |
| 642.34 | Trans hyperten-postpart  | Transient hypertension of pregnancy, postpartum condition or complication                                                                        |
| 642.4  | Mild/NOS preeclamp-unsp  | Mild or unspecified pre-eclampsia, unspecified as to episode of care or not applicable                                                           |

|        |                          |                                                                                                                                  |
|--------|--------------------------|----------------------------------------------------------------------------------------------------------------------------------|
| 642.41 | Mild/NOS preeclamp-deliv | Mild or unspecified pre-eclampsia, delivered, with or without mention of antepartum condition                                    |
| 642.42 | Mild preeclamp-del w p/p | Mild or unspecified pre-eclampsia, delivered, with mention of postpartum complication                                            |
| 642.43 | Mild/NOS preeclamp-antep | Mild or unspecified pre-eclampsia, antepartum condition or complication                                                          |
| 642.44 | Mild/NOS preeclamp-p/p   | Mild or unspecified pre-eclampsia, postpartum condition or complication                                                          |
| 642.5  | Severe preeclamp-unspec  | Severe pre-eclampsia, unspecified as to episode of care or not applicable                                                        |
| 642.51 | Severe preeclamp-deliver | Severe pre-eclampsia, delivered, with or without mention of antepartum condition                                                 |
| 642.52 | Sev preeclamp-del w p/p  | Severe pre-eclampsia, delivered, with mention of postpartum complication                                                         |
| 642.53 | Sev preeclamp-antepartum | Severe pre-eclampsia, antepartum condition or complication                                                                       |
| 642.54 | Sev preeclamp-postpartum | Severe pre-eclampsia, postpartum condition or complication                                                                       |
| 642.6  | Eclampsia-unspecified    | Eclampsia, unspecified as to episode of care or not applicable                                                                   |
| 642.61 | Eclampsia-delivered      | Eclampsia, delivered, with or without mention of antepartum condition                                                            |
| 642.62 | Eclampsia-deliv w p/p    | Eclampsia, delivered, with mention of postpartum complication                                                                    |
| 642.63 | Eclampsia-antepartum     | Eclampsia, antepartum condition or complication                                                                                  |
| 642.64 | Eclampsia-postpartum     | Eclampsia, postpartum condition or complication                                                                                  |
| 642.7  | Tox w old hyperten-unsp  | Pre-eclampsia or eclampsia superimposed on pre-existing hypertension, unspecified as to episode of care or not applicable        |
| 642.71 | Tox w old hyperten-deliv | Pre-eclampsia or eclampsia superimposed on pre-existing hypertension, delivered, with or without mention of antepartum condition |
| 642.72 | Tox w old hyp-del w p/p  | Pre-eclampsia or eclampsia superimposed on pre-existing hypertension, delivered, with mention of postpartum complication         |
| 642.73 | Tox w old hyper-antepart | Pre-eclampsia or eclampsia superimposed on pre-existing hypertension, antepartum condition or complication                       |

|        |                          |                                                                                                                                            |
|--------|--------------------------|--------------------------------------------------------------------------------------------------------------------------------------------|
| 642.74 | Tox w old hyper-postpart | Pre-eclampsia or eclampsia superimposed on pre-existing hypertension, postpartum condition or complication                                 |
| 642.9  | Hyperten preg NOS-unspec | Unspecified hypertension complicating pregnancy, childbirth, or the puerperium, unspecified as to episode of care or not applicable        |
| 642.91 | Hypertens NOS-delivered  | Unspecified hypertension complicating pregnancy, childbirth, or the puerperium, delivered, with or without mention of antepartum condition |
| 642.92 | Hypertens NOS-del w p/p  | Unspecified hypertension complicating pregnancy, childbirth, or the puerperium, delivered, with mention of postpartum complication         |
| 642.93 | Hypertens NOS-antepartum | Unspecified hypertension complicating pregnancy, childbirth, or the puerperium, antepartum condition or complication                       |
| 642.94 | Hypertens NOS-postpartum | Unspecified hypertension complicating pregnancy, childbirth, or the puerperium, postpartum condition or complication                       |
| 646.8  | Preg compl NEC-unspec    | Other specified complications of pregnancy, unspecified as to episode of care or not applicable                                            |
| 646.81 | Preg compl NEC-delivered | Other specified complications of pregnancy, delivered, with or without mention of antepartum condition                                     |
| 646.82 | Preg compl NEC-del w p/p | Other specified complications of pregnancy, delivered, with mention of postpartum complication                                             |
| 646.83 | Preg compl NEC-antepart  | Other specified complications of pregnancy, antepartum condition or complication                                                           |
| 646.84 | Preg compl NEC-postpart  | Other specified complications of pregnancy, postpartum condition or complication                                                           |
| 646.9  | Preg compl NOS-unspec    | Unspecified complication of pregnancy, unspecified as to episode of care or not applicable                                                 |

### Unemployment or low income

| ICD-9 Code | Short Description | Long Description |
|------------|-------------------|------------------|
| V62.0      | Unemployment      | Unemployment     |

**Schizophrenia or other psychoses**

| ICD-9 Code | Short Description         | Long Description                                                    |
|------------|---------------------------|---------------------------------------------------------------------|
| 295        | Simpl schizophren-unspec  | Simple type schizophrenia, unspecified                              |
| 295.01     | Simpl schizophren-subchr  | Simple type schizophrenia, subchronic                               |
| 295.02     | Simple schizophren-chr    | Simple type schizophrenia, chronic                                  |
| 295.03     | Simp schizo-subchr/exacer | Simple type schizophrenia, subchronic with acute exacerbation       |
| 295.04     | Simpl schizo-chr/exacerb  | Simple type schizophrenia, chronic with acute exacerbation          |
| 295.05     | Simpl schizophren-remiss  | Simple type schizophrenia, in remission                             |
| 295.1      | Hebephrenia-unspec        | Disorganized type schizophrenia, unspecified                        |
| 295.11     | Hebephrenia-subchronic    | Disorganized type schizophrenia, subchronic                         |
| 295.12     | Hebephrenia-chronic       | Disorganized type schizophrenia, chronic                            |
| 295.13     | Hebephren-subchr/exacerb  | Disorganized type schizophrenia, subchronic with acute exacerbation |
| 295.14     | Hebephrenia-chr/exacerb   | Disorganized type schizophrenia, chronic with acute exacerbation    |
| 295.15     | Hebephrenia-remission     | Disorganized type schizophrenia, in remission                       |
| 295.2      | Catatonia-unspec          | Catatonic type schizophrenia, unspecified                           |
| 295.21     | Catatonia-subchronic      | Catatonic type schizophrenia, subchronic                            |
| 295.22     | Catatonia-chronic         | Catatonic type schizophrenia, chronic                               |
| 295.23     | Catatonia-subchr/exacerb  | Catatonic type schizophrenia, subchronic with acute exacerbation    |
| 295.24     | Catatonia-chr/exacerb     | Catatonic type schizophrenia, chronic with acute exacerbation       |
| 295.25     | Catatonia-remission       | Catatonic type schizophrenia, in remission                          |
| 295.3      | Paranoid schizo-unspec    | Paranoid type schizophrenia, unspecified                            |
| 295.31     | Paranoid schizo-subchr    | Paranoid type schizophrenia, subchronic                             |
| 295.32     | Paranoid schizo-chronic   | Paranoid type schizophrenia, chronic                                |
| 295.33     | Paran schizo-subchr/exac  | Paranoid type schizophrenia, subchronic with acute exacerbation     |

|        |                          |                                                                            |
|--------|--------------------------|----------------------------------------------------------------------------|
| 295.34 | Paran schizo-chr/exacerb | Paranoid type schizophrenia, chronic with acute exacerbation               |
| 295.35 | Paranoid schizo-remiss   | Paranoid type schizophrenia, in remission                                  |
| 295.4  | Schizophreniform dis NOS | Schizophreniform disorder, unspecified                                     |
| 295.41 | Schizophrenic dis-subchr | Schizophreniform disorder, subchronic                                      |
| 295.42 | Schizophren dis-chronic  | Schizophreniform disorder, chronic                                         |
| 295.43 | Schizo dis-subchr/exacer | Schizophreniform disorder, subchronic with acute exacerbation              |
| 295.44 | Schizophr dis-chr/exacer | Schizophreniform disorder, chronic with acute exacerbation                 |
| 295.45 | Schizophrenic dis-remiss | Schizophreniform disorder, in remission                                    |
| 295.5  | Latent schizophr-unsp    | Latent schizophrenia, unspecified                                          |
| 295.51 | Lat schizophr-subchr     | Latent schizophrenia, subchronic                                           |
| 295.52 | Latent schizophr-chr     | Latent schizophrenia, chronic                                              |
| 295.53 | Lat schizo-subchr/exacer | Latent schizophrenia, subchronic with acute exacerbation                   |
| 295.54 | Latent schizo-chr/exacer | Latent schizophrenia, chronic with acute exacerbation                      |
| 295.55 | Lat schizophr-remiss     | Latent schizophrenia, in remission                                         |
| 295.6  | Schizophr dis resid NOS  | Schizophrenic disorders, residual type, unspecified                        |
| 295.61 | Schizoph dis resid-subch | Schizophrenic disorders, residual type, subchronic                         |
| 295.62 | Schizophr dis resid-chr  | Schizophrenic disorders, residual type, chronic                            |
| 295.63 | Schizo resid subchr/exac | Schizophrenic disorders, residual type, subchronic with acute exacerbation |
| 295.64 | Schizoph resid-chro/exac | Schizophrenic disorders, residual type, chronic with acute exacerbation    |
| 295.65 | Schizoph dis resid-remis | Schizophrenic disorders, residual type, in remission                       |
| 296.2  | Depress psychosis-unspec | Major depressive affective disorder, single episode, unspecified           |
| 296.21 | Depress psychosis-mild   | Major depressive affective disorder, single episode, mild                  |

|        |                          |                                                                                                       |
|--------|--------------------------|-------------------------------------------------------------------------------------------------------|
| 296.22 | Depressive psychosis-mod | Major depressive affective disorder, single episode, moderate                                         |
| 296.23 | Depress psychosis-severe | Major depressive affective disorder, single episode, severe, without mention of psychotic behavior    |
| 296.24 | Depr psychos-sev w psych | Major depressive affective disorder, single episode, severe, specified as with psychotic behavior     |
| 296.25 | Depr psychos-part remiss | Major depressive affective disorder, single episode, in partial or unspecified remission              |
| 296.26 | Depr psychos-full remiss | Major depressive affective disorder, single episode, in full remission                                |
| 296.3  | Recurr depr psychos-unsp | Major depressive affective disorder, recurrent episode, unspecified                                   |
| 296.31 | Recurr depr psychos-mild | Major depressive affective disorder, recurrent episode, mild                                          |
| 296.32 | Recurr depr psychos-mod  | Major depressive affective disorder, recurrent episode, moderate                                      |
| 296.33 | Recur depr psych-severe  | Major depressive affective disorder, recurrent episode, severe, without mention of psychotic behavior |
| 296.34 | Rec depr psych-psychotic | Major depressive affective disorder, recurrent episode, severe, specified as with psychotic behavior  |
| 296.35 | Recur depr psyc-part rem | Major depressive affective disorder, recurrent episode, in partial or unspecified remission           |
| 296.36 | Recur depr psyc-full rem | Major depressive affective disorder, recurrent episode, in full remission                             |
| 298    | React depress psychosis  | Depressive type psychosis                                                                             |
| 298.1  | Excitativ type psychosis | Excitative type psychosis                                                                             |
| 298.4  | Psychogen paranoid psych | Psychogenic paranoid psychosis                                                                        |
| 298.8  | React psychosis NEC/NOS  | Other and unspecified reactive psychosis                                                              |
| 298.9  | Psychosis NOS            | Unspecified psychosis                                                                                 |

### Depressive disorders

| ICD-9 Code | Short Description       | Long Description             |
|------------|-------------------------|------------------------------|
| 296.82     | Atypical depressive dis | Atypical depressive disorder |



|     |                         |                                               |
|-----|-------------------------|-----------------------------------------------|
| 311 | Depressive disorder NEC | Depressive disorder, not elsewhere classified |
|-----|-------------------------|-----------------------------------------------|

## Suicide

| ICD-9 Code | Short Description       | Long Description                                                                                                                                       |
|------------|-------------------------|--------------------------------------------------------------------------------------------------------------------------------------------------------|
| E950.6     | Poison-agricult agent   | Suicide and self-inflicted poisoning by agricultural and horticultural chemical and pharmaceutical preparations other than plant foods and fertilizers |
| E950.7     | Poison-corrosiv/caustic | Suicide and self-inflicted poisoning by corrosive and caustic substances                                                                               |
| E950.8     | Poison-arsenic          | Suicide and self-inflicted poisoning by arsenic and its compounds                                                                                      |
| E950.9     | Poison-solid/liquid NEC | Suicide and self-inflicted poisoning by other and unspecified solid and liquid substances                                                              |
| E951.0     | Poison-piped gas        | Suicide and self-inflicted poisoning by gas distributed by pipeline                                                                                    |
| E951.1     | Poison-gas in container | Suicide and self-inflicted poisoning by liquefied petroleum gas distributed in mobile containers                                                       |
| E951.8     | Poison-utility gas NEC  | Suicide and self-inflicted poisoning by other utility gas                                                                                              |
| E952.0     | Poison-exhaust gas      | Suicide and self-inflicted poisoning by motor vehicle exhaust gas                                                                                      |
| E952.1     | Poison-co NEC           | Suicide and self-inflicted poisoning by other carbon monoxide                                                                                          |
| E952.8     | Poison-gas/vapor NEC    | Suicide and self-inflicted poisoning by other specified gases and vapors                                                                               |
| E952.9     | Poison-gas/vapor NOS    | Suicide and self-inflicted poisoning by unspecified gases and vapors                                                                                   |
| E953.0     | Injury-hanging          | Suicide and self-inflicted injury by hanging                                                                                                           |
| E953.1     | Injury-suff w plas bag  | Suicide and self-inflicted injury by suffocation by plastic bag                                                                                        |
| E953.8     | Injury-strang/suff NEC  | Suicide and self-inflicted injury by other specified means                                                                                             |
| E953.9     | Injury-strang/suff NOS  | Suicide and self-inflicted injury by unspecified means                                                                                                 |
| E954.      | Injury-submersion       | Suicide and self-inflicted injury by submersion [drowning]                                                                                             |



|        |                          |                                                                               |
|--------|--------------------------|-------------------------------------------------------------------------------|
| E955.0 | Injury-handgun           | Suicide and self-inflicted injury by handgun                                  |
| E955.1 | Injury-shotgun           | Suicide and self-inflicted injury by shotgun                                  |
| E955.2 | Injury-hunting rifle     | Suicide and self-inflicted injury by hunting rifle                            |
| E955.3 | Injury-military firearm  | Suicide and self-inflicted injury by military firearms                        |
| E955.4 | Injury-firearm NEC       | Suicide and self-inflicted injury by other and unspecified firearm            |
| E955.5 | Injury-explosives        | Suicide and self-inflicted injury by explosives                               |
| E955.6 | Self inflict acc-air gun | Suicide and self-inflicted injury by air gun                                  |
| E955.7 | Self inj-paintball gun   | Suicide and self-inflicted injury by paintball gun                            |
| E955.9 | Injury-firearm/expl NOS  | Suicide and self-inflicted injury by firearms and explosives, unspecified     |
| E956.  | Injury-cut instrument    | Suicide and self-inflicted injury by cutting and piercing instrument          |
| E957.0 | Injury-jump fm residence | Suicide and self-inflicted injuries by jumping from residential premises      |
| E957.1 | Injury-jump fm struc NEC | Suicide and self-inflicted injuries by jumping from other man-made structures |
| E957.2 | Injury-jump fm natur sit | Suicide and self-inflicted injuries by jumping from natural sites             |
| E957.9 | Injury-jump NEC          | Suicide and self-inflicted injuries by jumping from unspecified site          |
| E958.0 | Injury-moving object     | Suicide and self-inflicted injury by jumping or lying before moving object    |
| E958.1 | Injury-burn, fire        | Suicide and self-inflicted injury by burns, fire                              |
| E958.2 | Injury-scald             | Suicide and self-inflicted injury by scald                                    |
| E958.3 | Injury-extreme cold      | Suicide and self-inflicted injury by extremes of cold                         |
| E958.4 | Injury-electrocution     | Suicide and self-inflicted injury by electrocution                            |
| E958.5 | Injury-motor veh crash   | Suicide and self-inflicted injury by crashing of motor vehicle                |
| E958.6 | Injury-aircraft crash    | Suicide and self-inflicted injury by crashing of aircraft                     |
| E958.7 | Injury-caustic substance | Suicide and self-inflicted injury by caustic substances, except poisoning     |

|        |            |                                                            |
|--------|------------|------------------------------------------------------------|
| E958.8 | Injury-NEC | Suicide and self-inflicted injury by other specified means |
| E958.9 | Injury-NOS | Suicide and self-inflicted injury by unspecified means     |

### Social anxiety disorder

| ICD-9 Code | Short Description | Long Description |
|------------|-------------------|------------------|
| 300.23     | Social phobia     | Social phobia    |

### Anxiety disorders

| ICD-9 Code | Short Description        | Long Description                                    |
|------------|--------------------------|-----------------------------------------------------|
| 293.84     | Anxiety disorder oth dis | Anxiety disorder in conditions classified elsewhere |
| 300        | Anxiety state NOS        | Anxiety state, unspecified                          |

### Anxiety disorders (except social anxiety)

| ICD-9 Code | Short Description         | Long Description                                                        |
|------------|---------------------------|-------------------------------------------------------------------------|
| 300.01     | Panic dis w/o agoraphobia | Panic disorder without agoraphobia                                      |
| 300.02     | Generalized anxiety dis   | Generalized anxiety disorder                                            |
| 300.09     | Anxiety state NEC         | Other anxiety states                                                    |
| 300.1      | Hysteria NOS              | Hysteria, unspecified                                                   |
| 300.11     | Conversion disorder       | Conversion disorder                                                     |
| 300.12     | Dissociative amnesia      | Dissociative amnesia                                                    |
| 300.13     | Dissociative fugue        | Dissociative fugue                                                      |
| 300.14     | Dissociative identity dis | Dissociative identity disorder                                          |
| 300.15     | Dissociative react NOS    | Dissociative disorder or reaction, unspecified                          |
| 300.16     | Factitious dis w symptom  | Factitious disorder with predominantly psychological signs and symptoms |
| 300.19     | Factitious ill NEC/NOS    | Other and unspecified factitious illness                                |
| 300.2      | Phobia NOS                | Phobia, unspecified                                                     |
| 300.21     | Agoraphobia w panic dis   | Agoraphobia with panic disorder                                         |

|        |                          |                                              |
|--------|--------------------------|----------------------------------------------|
| 300.22 | Agoraphobia w/o panic    | Agoraphobia without mention of panic attacks |
| 300.29 | Isolated/spec phobia NEC | Other isolated or specific phobias           |
| 300.3  | Obsessive-compulsive dis | Obsessive-compulsive disorders               |
| 300.4  | Dysthymic disorder       | Dysthymic disorder                           |
| 300.5  | Neurasthenia             | Neurasthenia                                 |
| 300.6  | Depersonalization disord | Depersonalization disorder                   |
| 300.7  | Hypochondriasis          | Hypochondriasis                              |
| 300.81 | Somatization disorder    | Somatization disorder                        |
| 300.82 | Undiff somatoform disrd  | Undifferentiated somatoform disorder         |
| 300.89 | Somatoform disorders NEC | Other somatoform disorders                   |
| 300.9  | Nonpsychotic disord NOS  | Unspecified nonpsychotic mental disorder     |

#### Positive symptoms of schizophrenia (i.e., hallucinations)

| ICD-9 Code | Short Description       | Long Description                                                     |
|------------|-------------------------|----------------------------------------------------------------------|
| 780.1      | Hallucinations          |                                                                      |
| 293.81     | Psy dis w delus oth dis | Psychotic disorder with delusions in conditions classified elsewhere |
| 333.99     | Extrapyramidal dis NEC  | Other extrapyramidal diseases and abnormal movement disorders        |

#### Bipolar disorders

| ICD-9 Code | Short Description        | Long Description                                                                                              |
|------------|--------------------------|---------------------------------------------------------------------------------------------------------------|
| 296.5      | Bipol I cur depres NOS   | Bipolar I disorder, most recent episode (or current) depressed, unspecified                                   |
| 296.51     | Bipol I cur depress-mild | Bipolar I disorder, most recent episode (or current) depressed, mild                                          |
| 296.52     | Bipol I cur depress-mod  | Bipolar I disorder, most recent episode (or current) depressed, moderate                                      |
| 296.53     | Bipol I curr dep w/o psy | Bipolar I disorder, most recent episode (or current) depressed, severe, without mention of psychotic behavior |
| 296.54     | Bipol I currnt dep w psy | Bipolar I disorder, most recent episode (or current) depressed, severe, specified as with                     |

|        |                           |                                                                                                           |
|--------|---------------------------|-----------------------------------------------------------------------------------------------------------|
|        |                           | psychotic behavior                                                                                        |
| 296.55 | Bipol I cur dep rem NOS   | Bipolar I disorder, most recent episode (or current) depressed, in partial or unspecified remission       |
| 296.56 | Bipol I currnt dep remis  | Bipolar I disorder, most recent episode (or current) depressed, in full remission                         |
| 296.6  | Bipol I currnt mixed NOS  | Bipolar I disorder, most recent episode (or current) mixed, unspecified                                   |
| 296.61 | Bipol I currnt mix-mild   | Bipolar I disorder, most recent episode (or current) mixed, mild                                          |
| 296.62 | Bipol I currnt mixed-mod  | Bipolar I disorder, most recent episode (or current) mixed, moderate                                      |
| 296.63 | Bipol I cur mix w/o psy   | Bipolar I disorder, most recent episode (or current) mixed, severe, without mention of psychotic behavior |
| 296.64 | Bipol I cur mixed w psy   | Bipolar I disorder, most recent episode (or current) mixed, severe, specified as with psychotic behavior  |
| 296.65 | Bipol I cur mix-part rem  | Bipolar I disorder, most recent episode (or current) mixed, in partial or unspecified remission           |
| 296.66 | Bipol I cur mixed remiss  | Bipolar I disorder, most recent episode (or current) mixed, in full remission                             |
| 296.7  | Bipolor I current NOS     | Bipolar I disorder, most recent episode (or current) unspecified                                          |
| 296.8  | Bipolar disorder NOS      | Bipolar disorder, unspecified                                                                             |
| 296    | Bipol I single manic NOS  | Bipolar I disorder, single manic episode, unspecified                                                     |
| 296.01 | Bipol I single manic-mild | Bipolar I disorder, single manic episode, mild                                                            |
| 296.02 | Bipol I single manic-mod  | Bipolar I disorder, single manic episode, moderate                                                        |
| 296.03 | Bipol I sing-sev w/o psy  | Bipolar I disorder, single manic episode, severe, without mention of psychotic behavior                   |
| 296.04 | Bipo I sin man-sev w psy  | Bipolar I disorder, single manic episode, severe, specified as with psychotic behavior                    |
| 296.05 | Bipol I sing man rem NOS  | Bipolar I disorder, single manic episode, in partial or unspecified remission                             |

|        |                           |                                                                                                           |
|--------|---------------------------|-----------------------------------------------------------------------------------------------------------|
| 296.06 | Bipol I single manic rem  | Bipolar I disorder, single manic episode, in full remission                                               |
| 296.4  | Bipol I currnt manic NOS  | Bipolar I disorder, most recent episode (or current) manic, unspecified                                   |
| 296.41 | Bipol I currnt manic-mild | Bipolar I disorder, most recent episode (or current) manic, mild                                          |
| 296.42 | Bipol I currnt manic-mod  | Bipolar I disorder, most recent episode (or current) manic, moderate                                      |
| 296.43 | Bipol I manic-sev w/o psy | Bipolar I disorder, most recent episode (or current) manic, severe, without mention of psychotic behavior |
| 296.44 | Bipol I manic-sev w psy   | Bipolar I disorder, most recent episode (or current) manic, severe, specified as with psychotic behavior  |
| 296.45 | Bipol I cur man part rem  | Bipolar I disorder, most recent episode (or current) manic, in partial or unspecified remission           |
| 296.46 | Bipol I cur man full rem  | Bipolar I disorder, most recent episode (or current) manic, in full remission                             |

### Substance dependence or abuse of alcohol, tobacco, and other illicit drugs

| ICD-9 Code | Short Description        | Long Description                                         |
|------------|--------------------------|----------------------------------------------------------|
| 303.9      | Alcoh dep NEC/NOS-unspec | Other and unspecified alcohol dependence, unspecified    |
| 303.91     | Alcoh dep NEC/NOS-contin | Other and unspecified alcohol dependence, continuous     |
| 303.92     | Alcoh dep NEC/NOS-episod | Other and unspecified alcohol dependence, episodic       |
| 303.93     | Alcoh dep NEC/NOS-remiss | Other and unspecified alcohol dependence, in remission   |
| 304        | Opioid dependence-unspec | Opioid type dependence, unspecified                      |
| 304.01     | Opioid dependence-contin | Opioid type dependence, continuous                       |
| 304.02     | Opioid dependence-episod | Opioid type dependence, episodic                         |
| 304.03     | Opioid dependence-remiss | Opioid type dependence, in remission                     |
| 304.1      | Sed,hyp,anxiolyt dep-NOS | Sedative, hypnotic or anxiolytic dependence, unspecified |
| 304.11     | Sed,hyp,anxiolyt dep-con | Sedative, hypnotic or anxiolytic dependence, continuous  |

|        |                          |                                                                              |
|--------|--------------------------|------------------------------------------------------------------------------|
| 304.12 | Sed,hyp,anxiolyt dep-epi | Sedative, hypnotic or anxiolytic dependence, episodic                        |
| 304.13 | Sed,hyp,anxiolyt dep-rem | Sedative, hypnotic or anxiolytic dependence, in remission                    |
| 304.2  | Cocaine depend-unspec    | Cocaine dependence, unspecified                                              |
| 304.21 | Cocaine depend-contin    | Cocaine dependence, continuous                                               |
| 304.22 | Cocaine depend-episodic  | Cocaine dependence, episodic                                                 |
| 304.23 | Cocaine depend-remiss    | Cocaine dependence, in remission                                             |
| 304.3  | Cannabis depend-unspec   | Cannabis dependence, unspecified                                             |
| 304.31 | Cannabis depend-contin   | Cannabis dependence, continuous                                              |
| 304.32 | Cannabis depend-episodic | Cannabis dependence, episodic                                                |
| 304.33 | Cannabis depend-remiss   | Cannabis dependence, in remission                                            |
| 304.4  | Amphetamin depend-unspec | Amphetamine and other psychostimulant dependence, unspecified                |
| 304.41 | Amphetamin depend-contin | Amphetamine and other psychostimulant dependence, continuous                 |
| 304.42 | Amphetamin depend-episod | Amphetamine and other psychostimulant dependence, episodic                   |
| 304.43 | Amphetamin depend-remiss | Amphetamine and other psychostimulant dependence, in remission               |
| 304.5  | Hallucinogen dep-unspec  | Hallucinogen dependence, unspecified                                         |
| 304.51 | Hallucinogen dep-contin  | Hallucinogen dependence, continuous                                          |
| 304.52 | Hallucinogen dep-episod  | Hallucinogen dependence, episodic                                            |
| 304.53 | Hallucinogen dep-remiss  | Hallucinogen dependence, in remission                                        |
| 304.6  | Drug depend NEC-unspec   | Other specified drug dependence, unspecified                                 |
| 304.61 | Drug depend NEC-contin   | Other specified drug dependence, continuous                                  |
| 304.62 | Drug depend NEC-episodic | Other specified drug dependence, episodic                                    |
| 304.63 | Drug depend NEC-in rem   | Other specified drug dependence, in remission                                |
| 304.7  | Opioid/other dep-unspec  | Combinations of opioid type drug with any other drug dependence, unspecified |
| 304.71 | Opioid/other dep-contin  | Combinations of opioid type drug with any other drug dependence, continuous  |
| 304.72 | Opioid/other dep-episod  | Combinations of opioid type drug with any other                              |

|        |                          |                                                                               |
|--------|--------------------------|-------------------------------------------------------------------------------|
|        |                          | drug dependence, episodic                                                     |
| 304.73 | Opioid/other dep-remiss  | Combinations of opioid type drug with any other drug dependence, in remission |
| 304.8  | Comb drug dep NEC-unspec | Combinations of drug dependence excluding opioid type drug, unspecified       |
| 304.81 | Comb drug dep NEC-contin | Combinations of drug dependence excluding opioid type drug, continuous        |
| 304.82 | Comb drug dep NEC-episod | Combinations of drug dependence excluding opioid type drug, episodic          |
| 304.83 | Comb drug dep NEC-remiss | Combinations of drug dependence excluding opioid type drug, in remission      |
| 304.9  | Drug depend NOS-unspec   | Unspecified drug dependence, unspecified                                      |
| 304.91 | Drug depend NOS-contin   | Unspecified drug dependence, continuous                                       |
| 304.92 | Drug depend NOS-episodic | Unspecified drug dependence, episodic                                         |
| 304.93 | Drug depend NOS-remiss   | Unspecified drug dependence, in remission                                     |
| 305    | Alcohol abuse-unspec     | Alcohol abuse, unspecified                                                    |
| 305.01 | Alcohol abuse-continuous | Alcohol abuse, continuous                                                     |
| 305.02 | Alcohol abuse-episodic   | Alcohol abuse, episodic                                                       |
| 305.03 | Alcohol abuse-in remiss  | Alcohol abuse, in remission                                                   |
| 305.3  | Hallucinog abuse-unspec  | Hallucinogen abuse, unspecified                                               |
| 305.31 | Hallucinog abuse-contin  | Hallucinogen abuse, continuous                                                |
| 305.32 | Hallucinog abuse-episod  | Hallucinogen abuse, episodic                                                  |
| 305.33 | Hallucinog abuse-remiss  | Hallucinogen abuse, in remission                                              |
| 305.4  | Sed,hyp,anxiolytc ab-NOS | Sedative, hypnotic or anxiolytic abuse, unspecified                           |
| 305.41 | Sed,hyp,anxiolytc ab-con | Sedative, hypnotic or anxiolytic abuse, continuous                            |
| 305.42 | Sed,hyp,anxiolytc ab-epi | Sedative, hypnotic or anxiolytic abuse, episodic                              |
| 305.43 | Sed,hyp,anxiolytc ab-rem | Sedative, hypnotic or anxiolytic abuse, in remission                          |
| 305.5  | Opioid abuse-unspec      | Opioid abuse, unspecified                                                     |
| 305.51 | Opioid abuse-continuous  | Opioid abuse, continuous                                                      |
| 305.52 | Opioid abuse-episodic    | Opioid abuse, episodic                                                        |

|        |                          |                                                                   |
|--------|--------------------------|-------------------------------------------------------------------|
| 305.53 | Opioid abuse-in remiss   | Opioid abuse, in remission                                        |
| 305.6  | Cocaine abuse-unspec     | Cocaine abuse, unspecified                                        |
| 305.61 | Cocaine abuse-continuous | Cocaine abuse, continuous                                         |
| 305.62 | Cocaine abuse-episodic   | Cocaine abuse, episodic                                           |
| 305.63 | Cocaine abuse-in remiss  | Cocaine abuse, in remission                                       |
| 305.7  | Amphetamine abuse-unspec | Amphetamine or related acting sympathomimetic abuse, unspecified  |
| 305.71 | Amphetamine abuse-contin | Amphetamine or related acting sympathomimetic abuse, continuous   |
| 305.72 | Amphetamine abuse-episod | Amphetamine or related acting sympathomimetic abuse, episodic     |
| 305.73 | Amphetamine abuse-remiss | Amphetamine or related acting sympathomimetic abuse, in remission |
| 305.8  | Antidepress abuse-unspec | Antidepressant type abuse, unspecified                            |
| 305.81 | Antidepress abuse-contin | Antidepressant type abuse, continuous                             |
| 305.82 | Antidepress abuse-episod | Antidepressant type abuse, episodic                               |
| 305.83 | Antidepress abuse-remiss | Antidepressant type abuse, in remission                           |

### Cannabis abuse

| ICD-9 Code | Short Description        | Long Description             |
|------------|--------------------------|------------------------------|
| 305.2      | Cannabis abuse-unspec    | Cannabis abuse, unspecified  |
| 305.21     | Cannabis abuse-contin    | Cannabis abuse, continuous   |
| 305.22     | Cannabis abuse-episodic  | Cannabis abuse, episodic     |
| 305.23     | Cannabis abuse-in remiss | Cannabis abuse, in remission |

### Tobacco use

| ICD-9 Code | Short Description    | Long Description     |
|------------|----------------------|----------------------|
| 305.1      | Tobacco use disorder | Tobacco use disorder |

### Alcohol abuse

| ICD-9 Code | Short Description | Long Description |
|------------|-------------------|------------------|
|------------|-------------------|------------------|



|        |                          |                                                        |
|--------|--------------------------|--------------------------------------------------------|
| 303.9  | Alcoh dep NEC/NOS-unspec | Other and unspecified alcohol dependence, unspecified  |
| 303.91 | Alcoh dep NEC/NOS-contin | Other and unspecified alcohol dependence, continuous   |
| 303.92 | Alcoh dep NEC/NOS-episod | Other and unspecified alcohol dependence, episodic     |
| 303.93 | Alcoh dep NEC/NOS-remiss | Other and unspecified alcohol dependence, in remission |

For peer review only

**eFigure 1.** Multivariate adjusted rates of admissions for myocardial infarction over 2010-2014 in Colorado, site of implementation of the 2012 recreational cannabis legalization policy, compared with New York (A) and Oklahoma (B), control states without cannabis legalization. Red lines show the predicted rates of admissions for myocardial infarction (and all remaining medical diagnoses plotted in Figures S2-S31) had the cannabis legalization policy not been instituted. RR = risk ratio; CI = confidence interval.

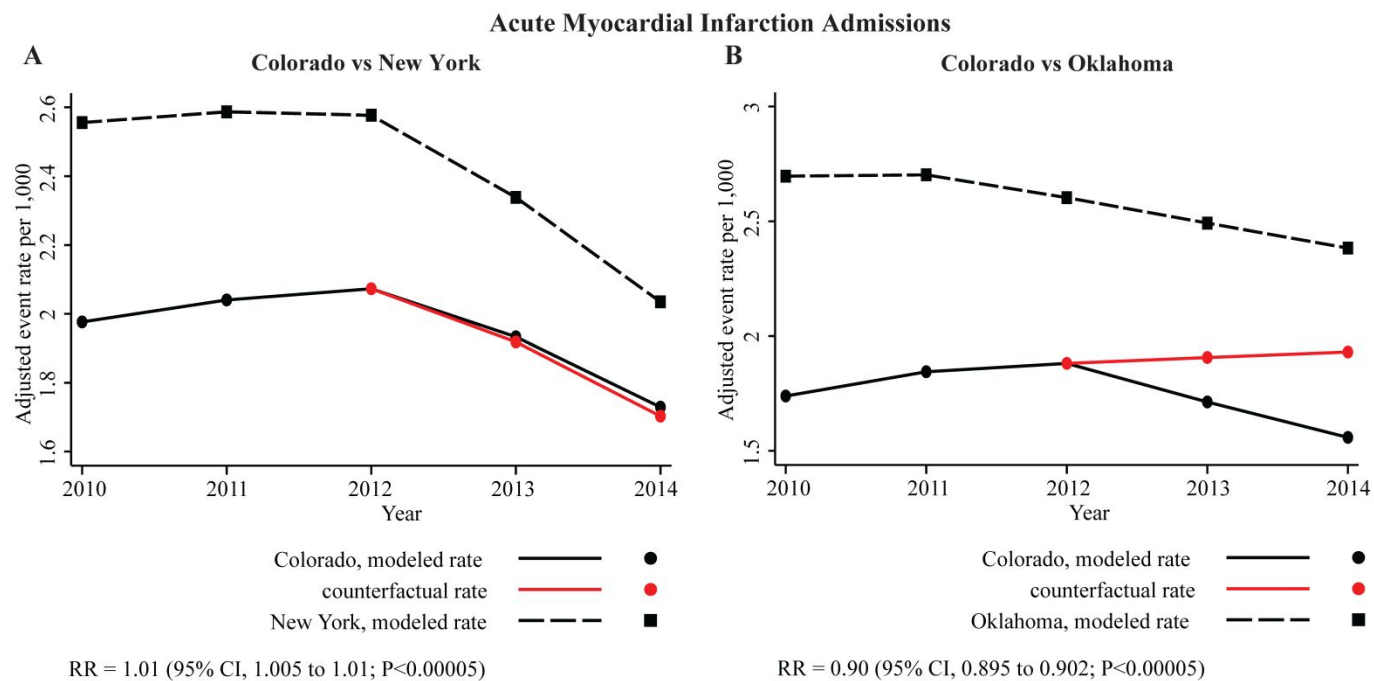

**eFigure 2.** Multivariate adjusted rates of admissions for brain hemorrhage over 2010-2014 in Colorado compared with New York (A) and Oklahoma (B). RR = risk ratio; CI = confidence interval.

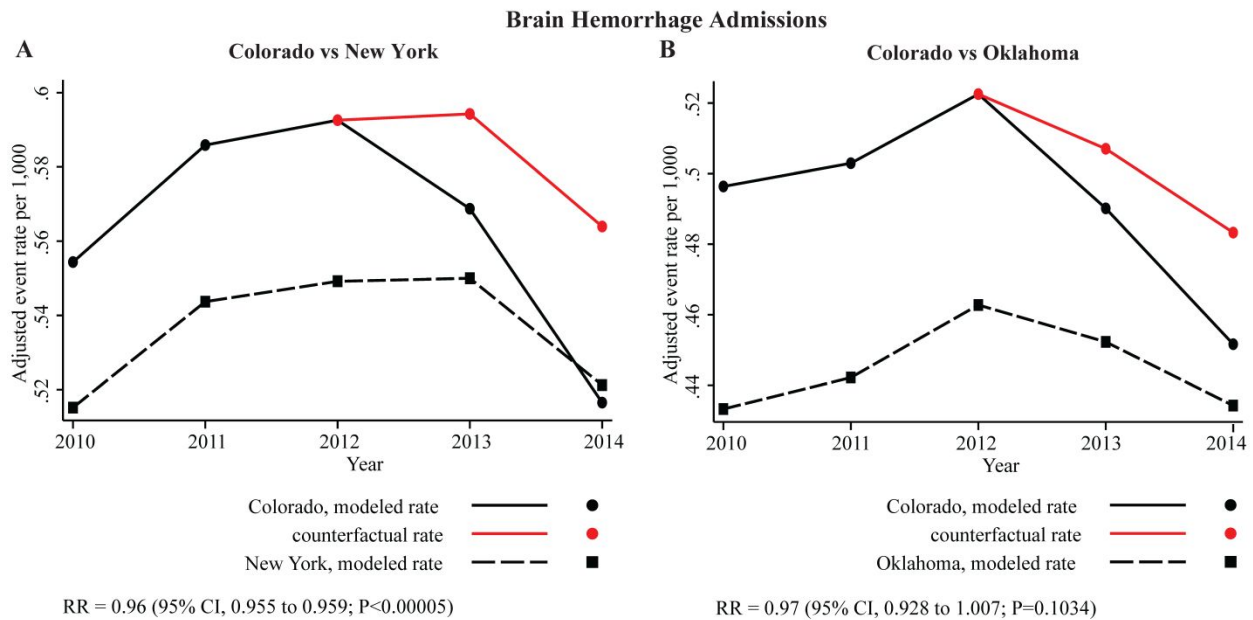

**eFigure 3.** Multivariate adjusted rates of admissions for ischemic stroke over 2010-2014 in Colorado compared with New York (A) and Oklahoma (B). RR = risk ratio; CI = confidence interval.

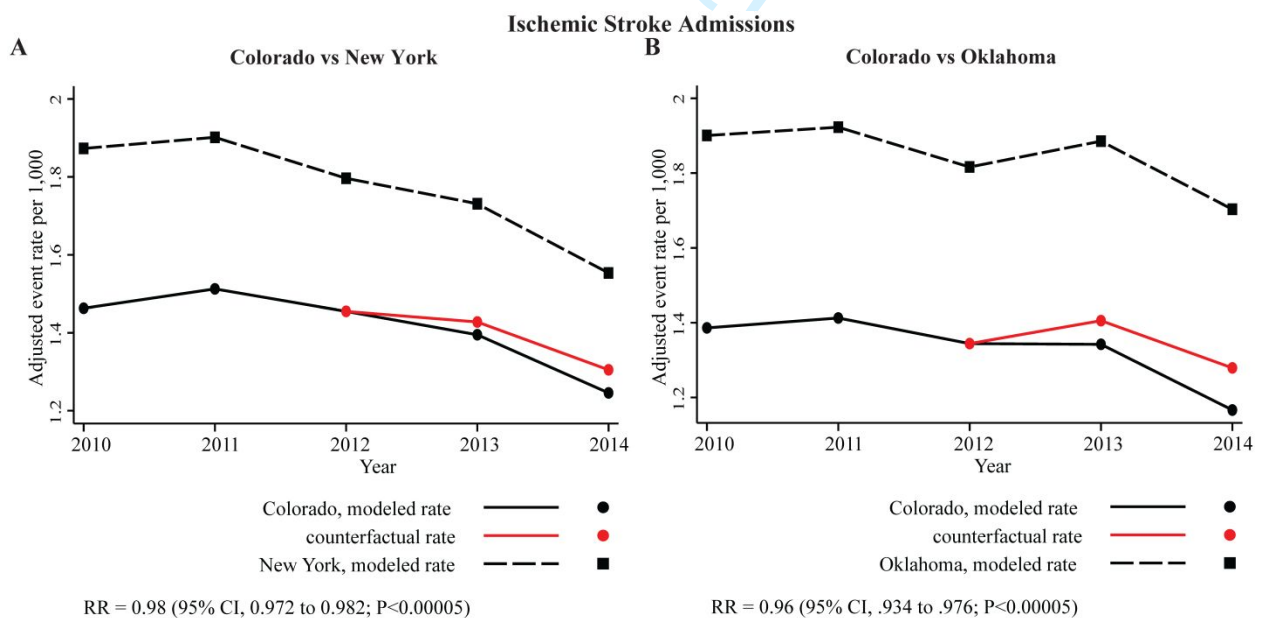

**eFigure 4.** Multivariate adjusted rates of admissions for metabolic syndrome and diabetes over 2010-2014 in Colorado compared with New York (A) and Oklahoma (B). RR = risk ratio; CI = confidence interval.

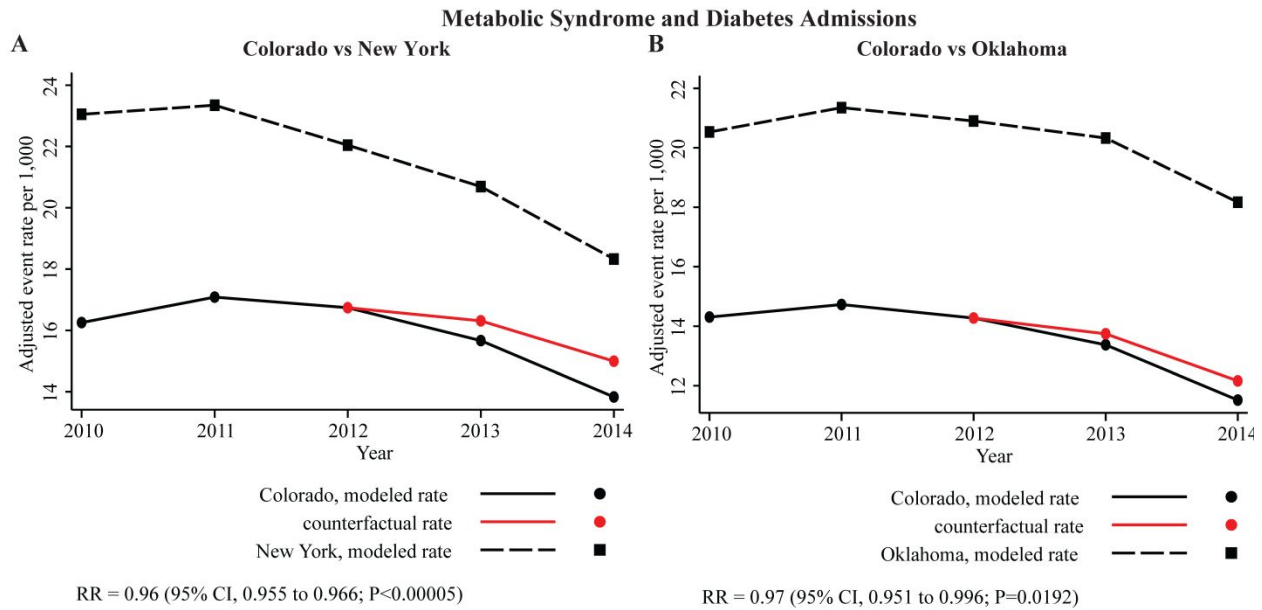

**eFigure 5.** Multivariate adjusted rates of admissions for prediabetes over 2010-2014 in Colorado compared with New York (A) and Oklahoma (B). RR = risk ratio; CI = confidence interval.

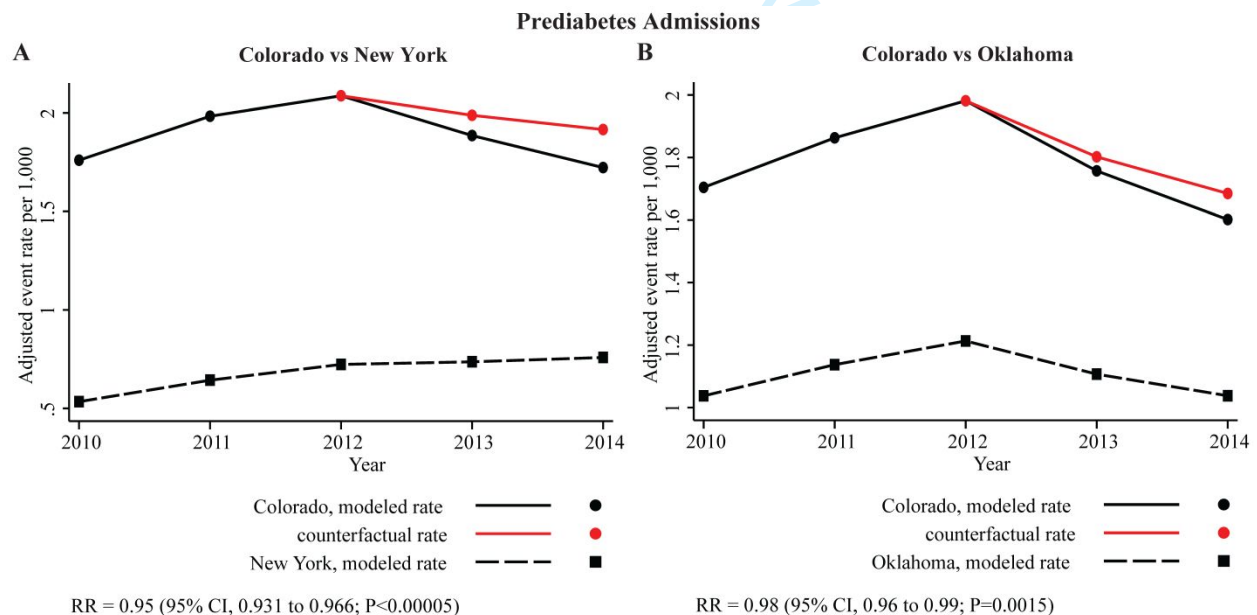

**eFigure 6.** Multivariate adjusted rates of admissions for alcohol abuse over 2010-2014 in Colorado compared with New York (A) and Oklahoma (B). RR = risk ratio; CI = confidence interval.

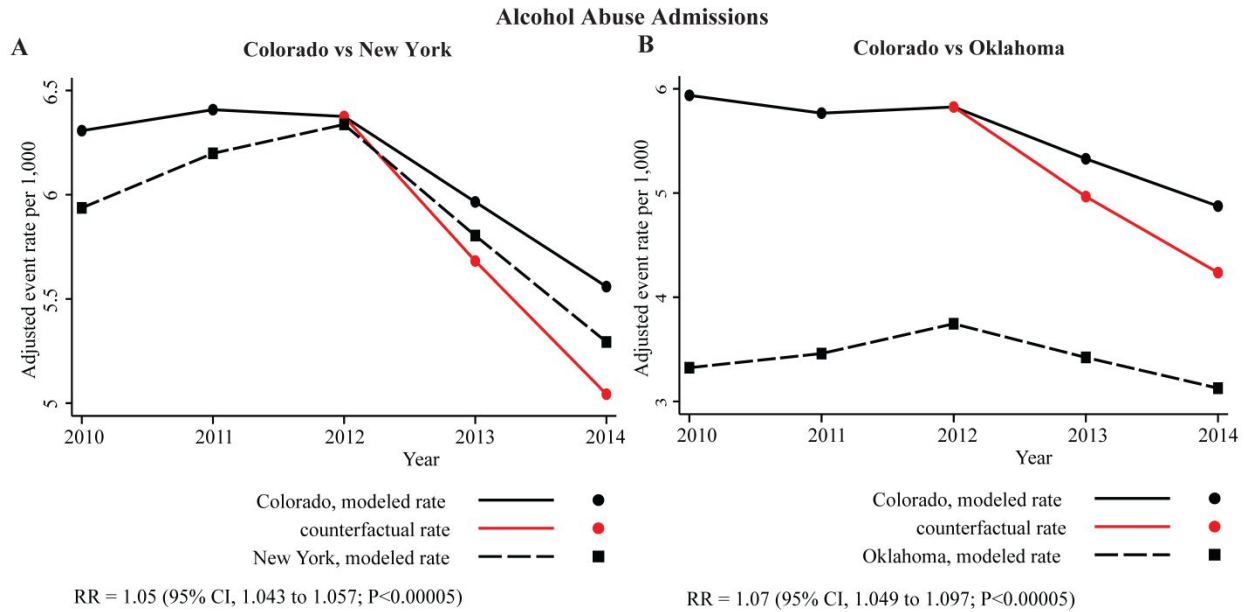

**eFigure 7.** Multivariate adjusted rates of admissions for motor vehicle accidents over 2010-2014 in Colorado compared with New York (A) and Oklahoma (B). RR = risk ratio; CI = confidence interval.

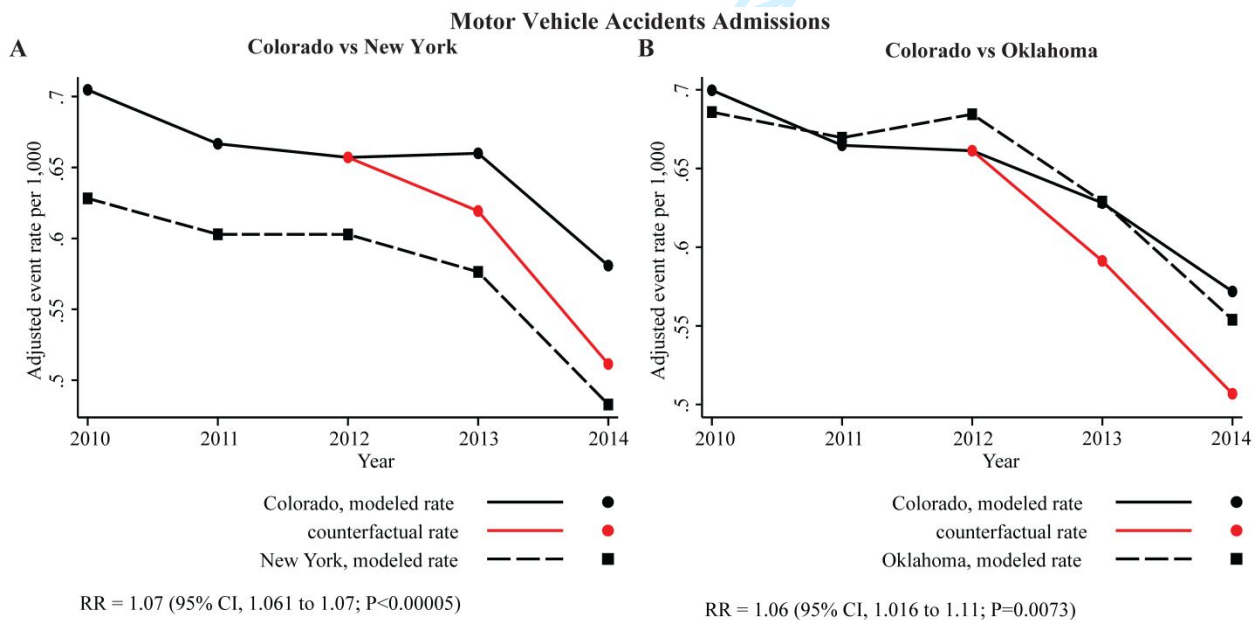

**eFigure 8.** Multivariate adjusted rates of admissions for overdose injury over 2010-2014 in Colorado compared with New York (A) and Oklahoma (B). RR = risk ratio; CI = confidence interval.

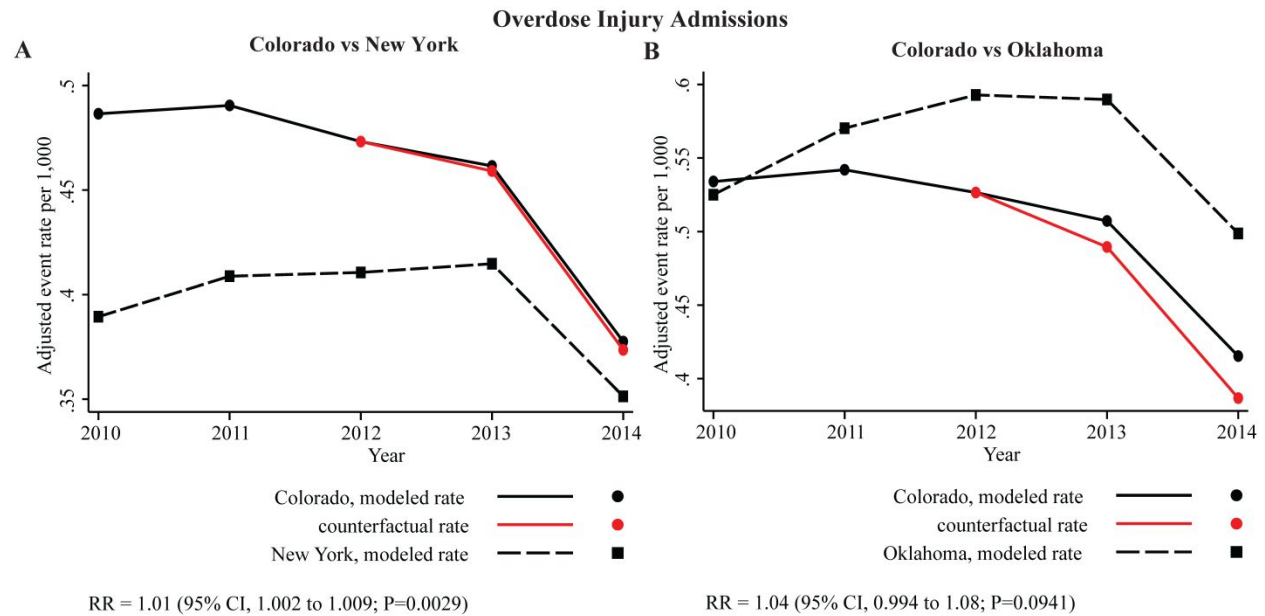

**eFigure 9.** Multivariate adjusted rates of admissions for anxiety disorders (except social anxiety) over 2010-2014 in Colorado compared with New York (A) and Oklahoma (B). RR = risk ratio; CI = confidence interval.

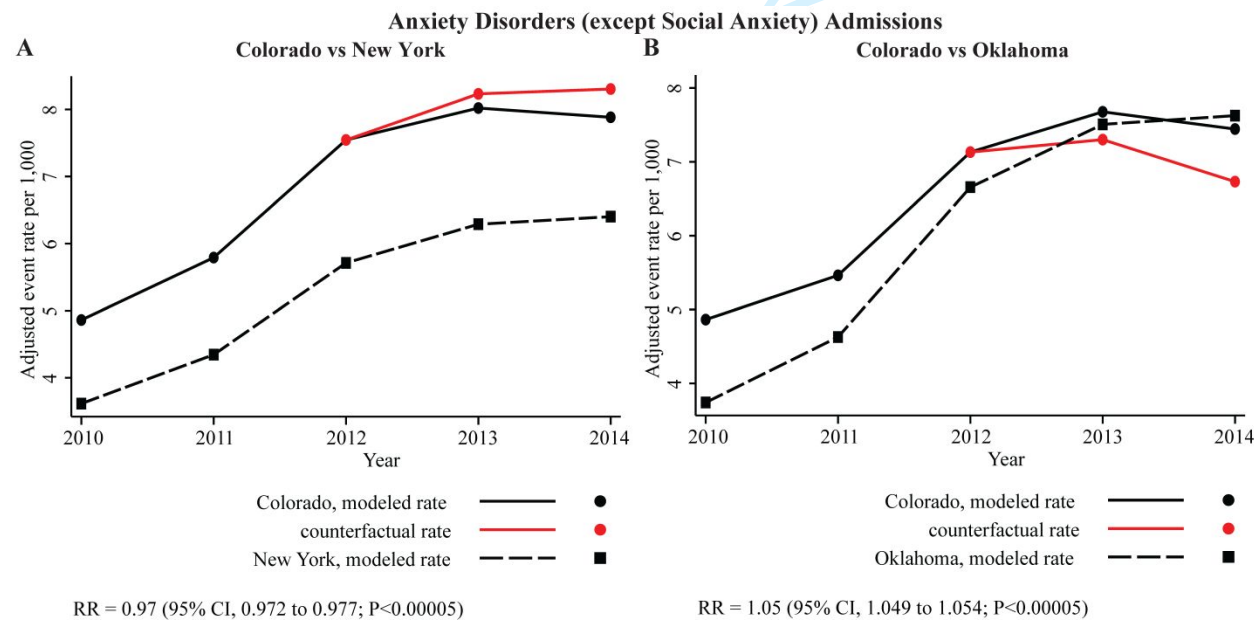



**eFigure 10.** Multivariate adjusted rates of admissions for bipolar disorders over 2010-2014 in Colorado compared with New York (A) and Oklahoma (B). RR = risk ratio; CI = confidence interval.

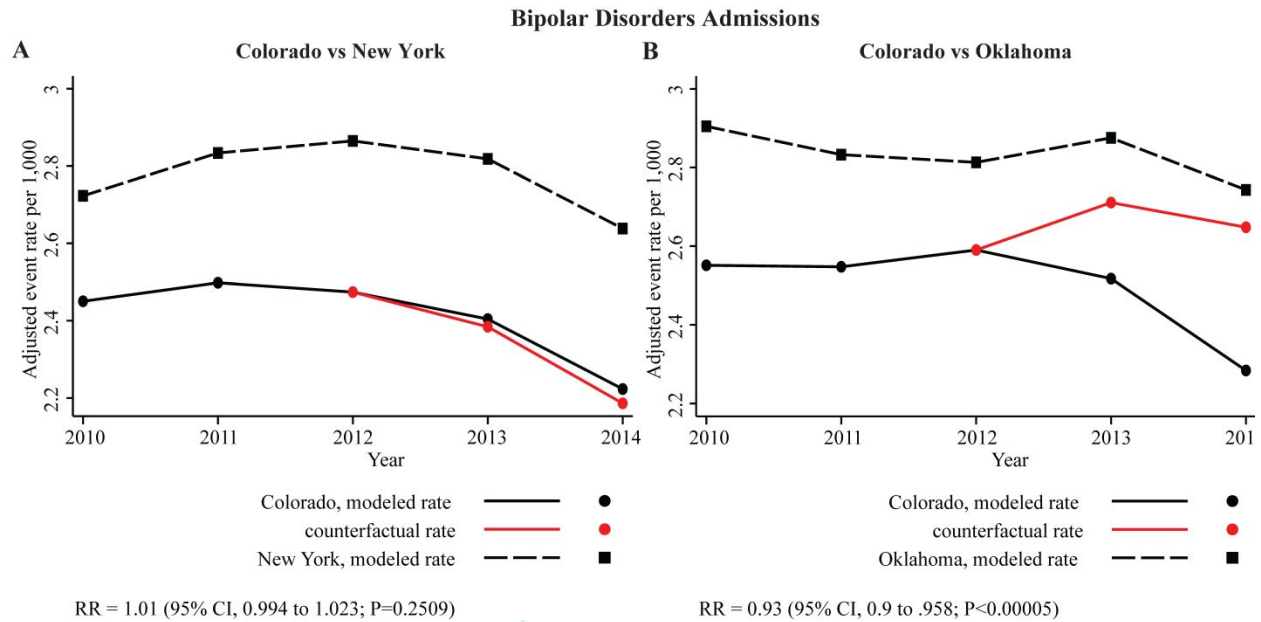

**eFigure 11.** Multivariate adjusted rates of admissions for anxiety disorders over 2010-2014 in Colorado compared with New York (A) and Oklahoma (B). RR = risk ratio; CI = confidence interval.

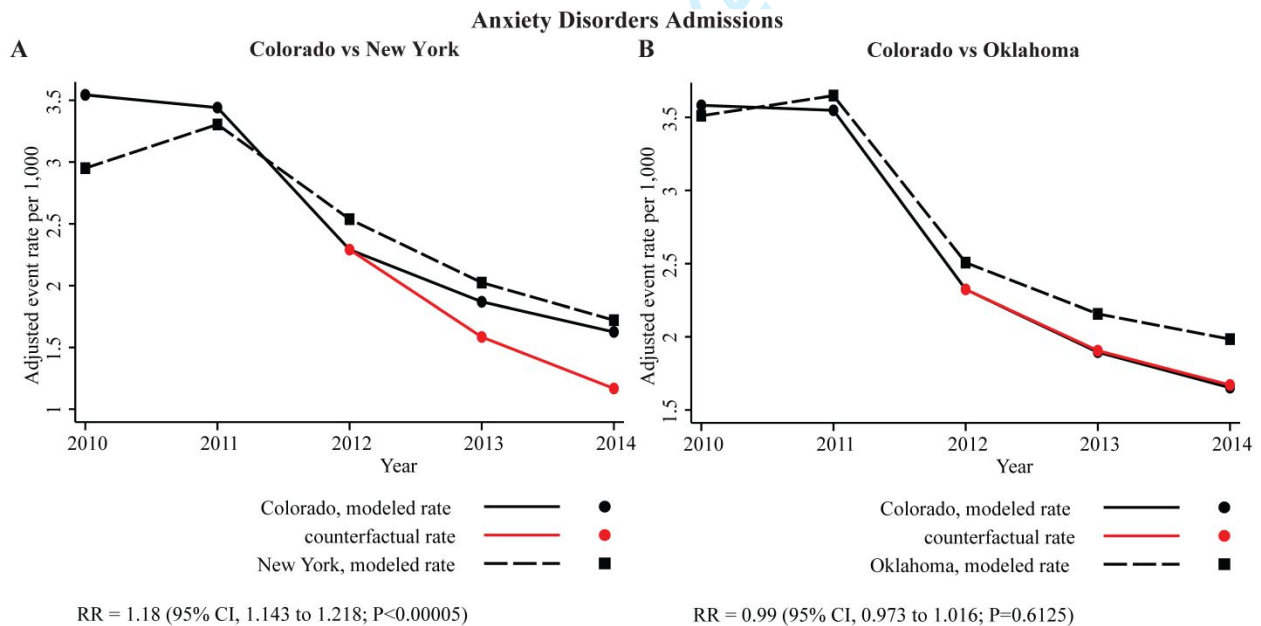

**eFigure 12.** Multivariate adjusted rates of admissions for depressive disorders over 2010-2014 in Colorado compared with New York (A) and Oklahoma (B). RR = risk ratio; CI = confidence interval.

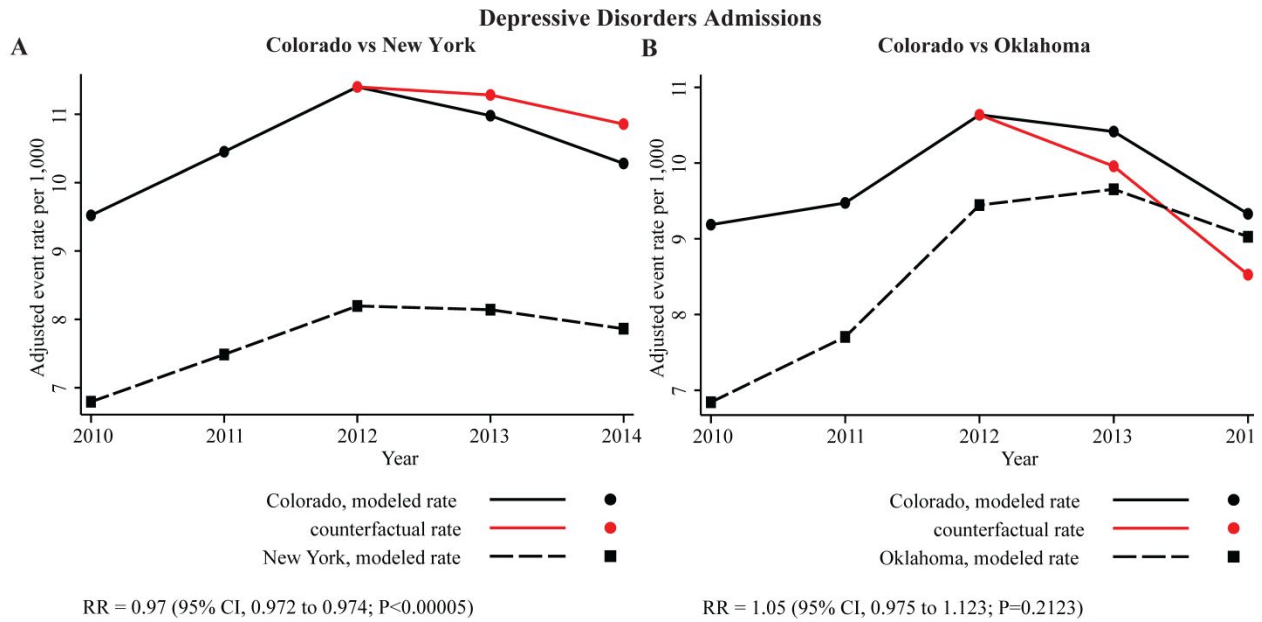

**eFigure 13.** Multivariate adjusted rates of admissions for post-traumatic stress disorder over 2010-2014 in Colorado compared with New York (A) and Oklahoma (B). RR = risk ratio; CI = confidence interval.

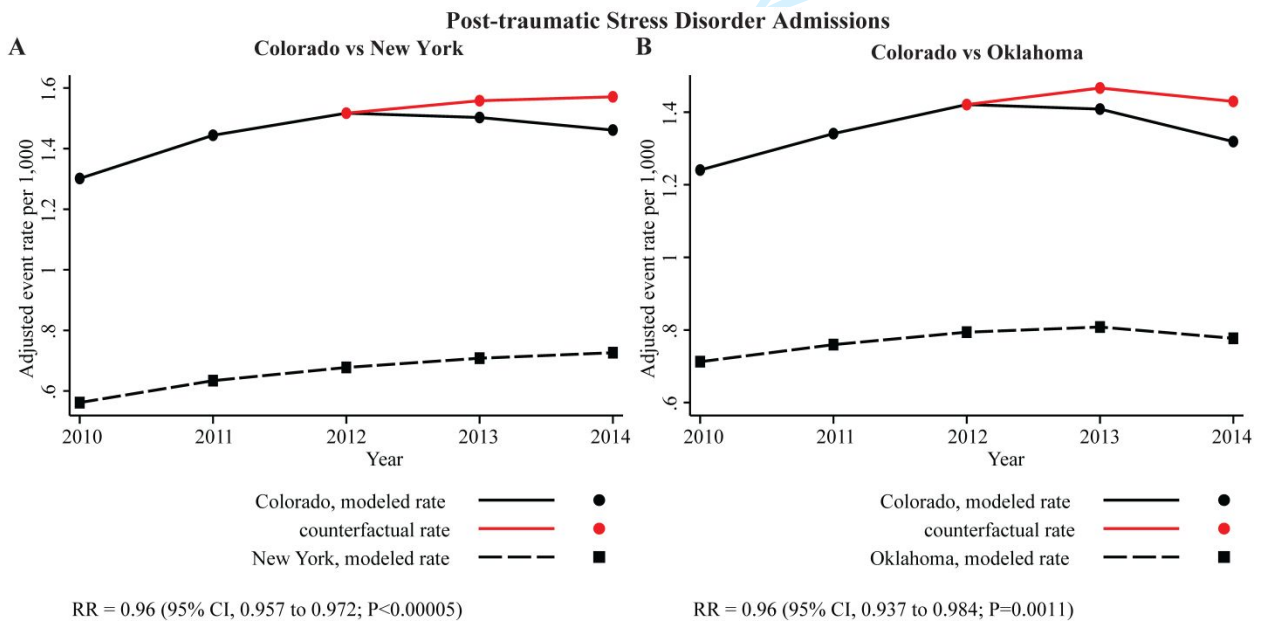



**eFigure 14.** Multivariate adjusted rates of admissions for schizophrenia or other psychoses over 2010-2014 in Colorado compared with New York (A) and Oklahoma (B). RR = risk ratio; CI = confidence interval.

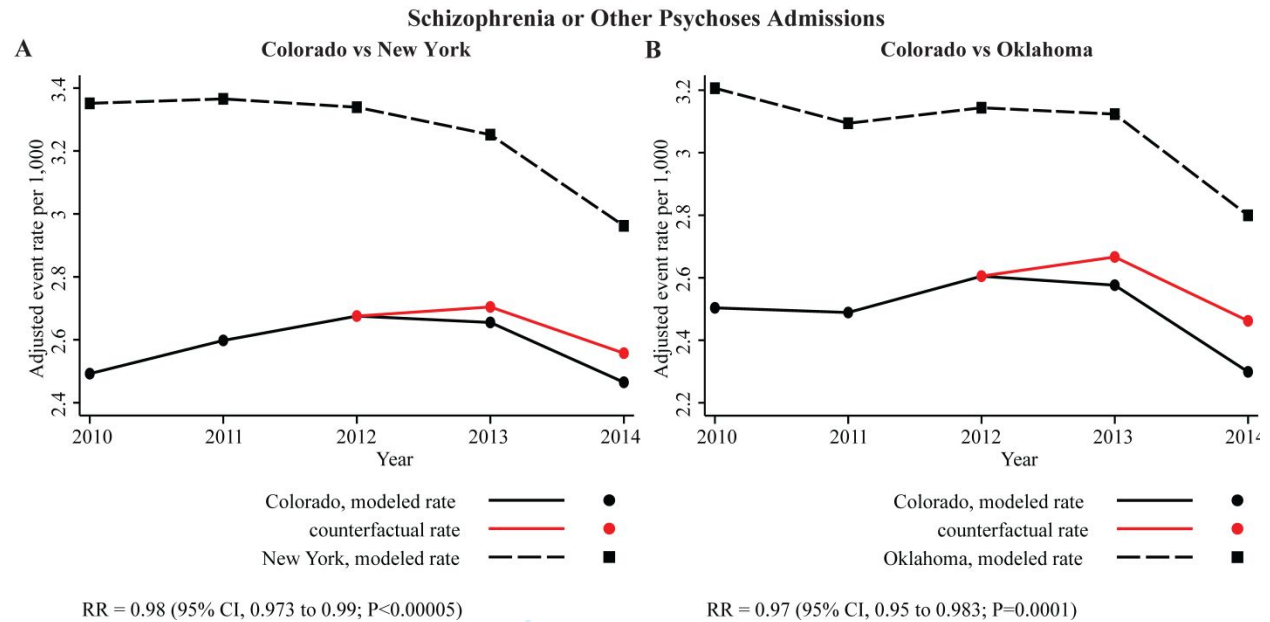

**eFigure 15.** Multivariate adjusted rates of admissions for social anxiety disorder over 2010-2014 in Colorado compared with New York (A) and Oklahoma (B). RR = risk ratio; CI = confidence interval.

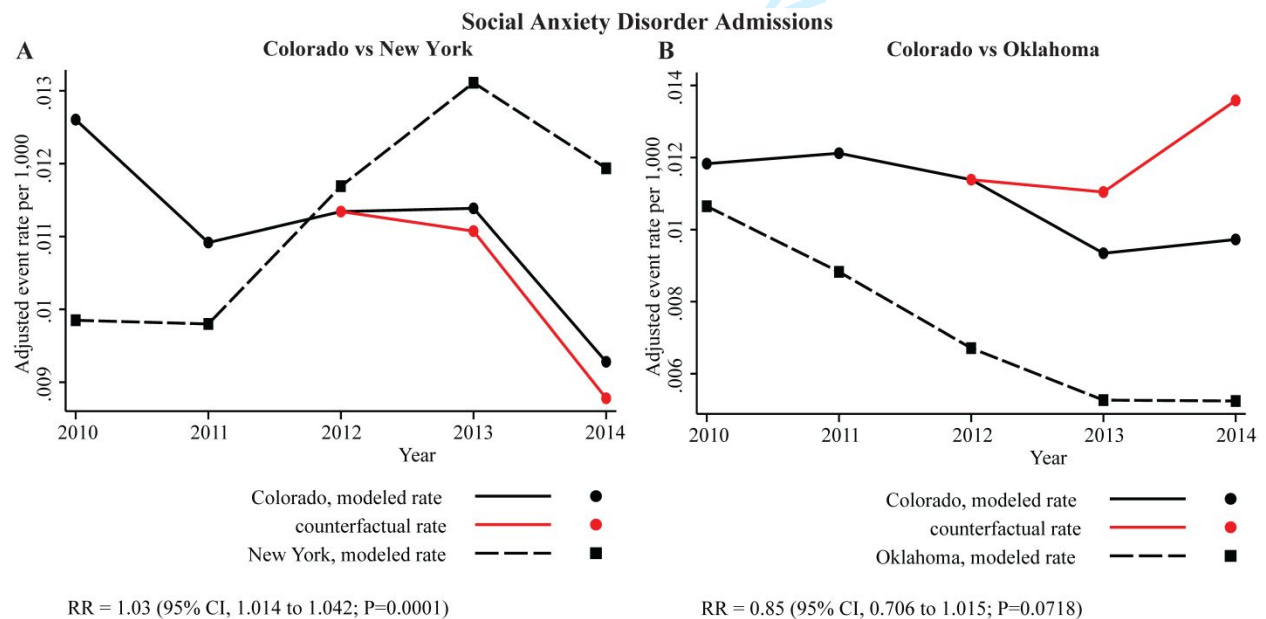

**eFigure 16.** Multivariate adjusted rates of admissions for suicide over 2010-2014 in Colorado compared with New York (A) and Oklahoma (B). RR = risk ratio; CI = confidence interval.

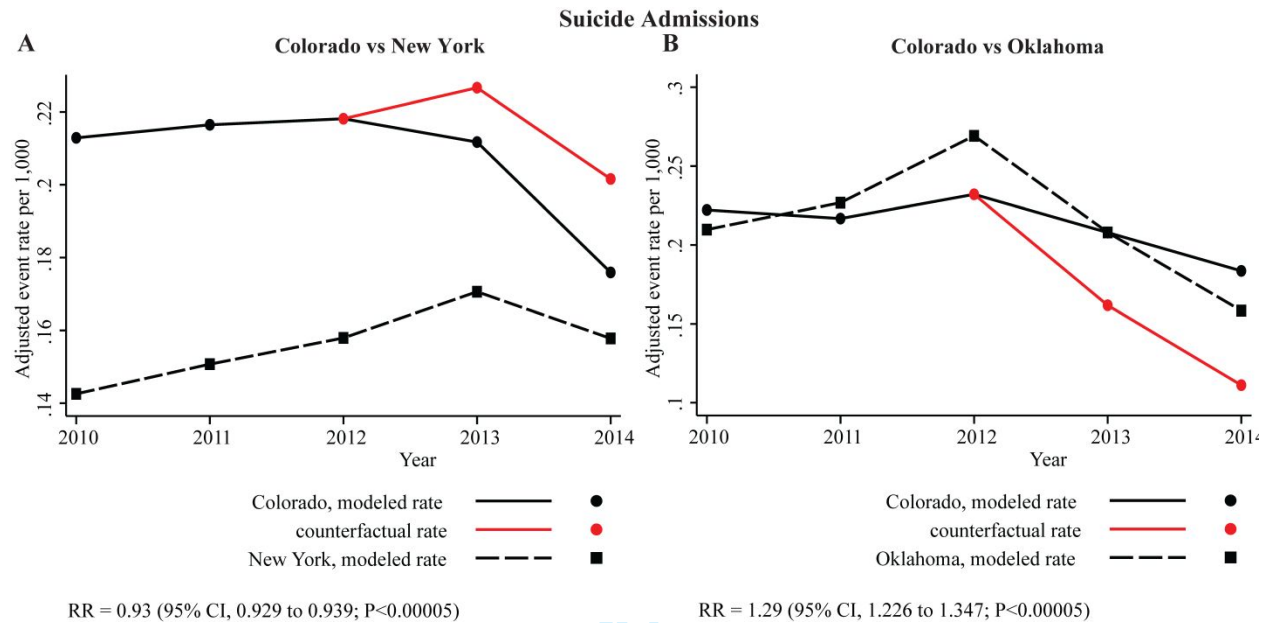

**eFigure 17.** Multivariate adjusted rates of admissions for positive symptoms of schizophrenia over 2010-2014 in Colorado compared with New York (A) and Oklahoma (B). RR = risk ratio; CI = confidence interval.

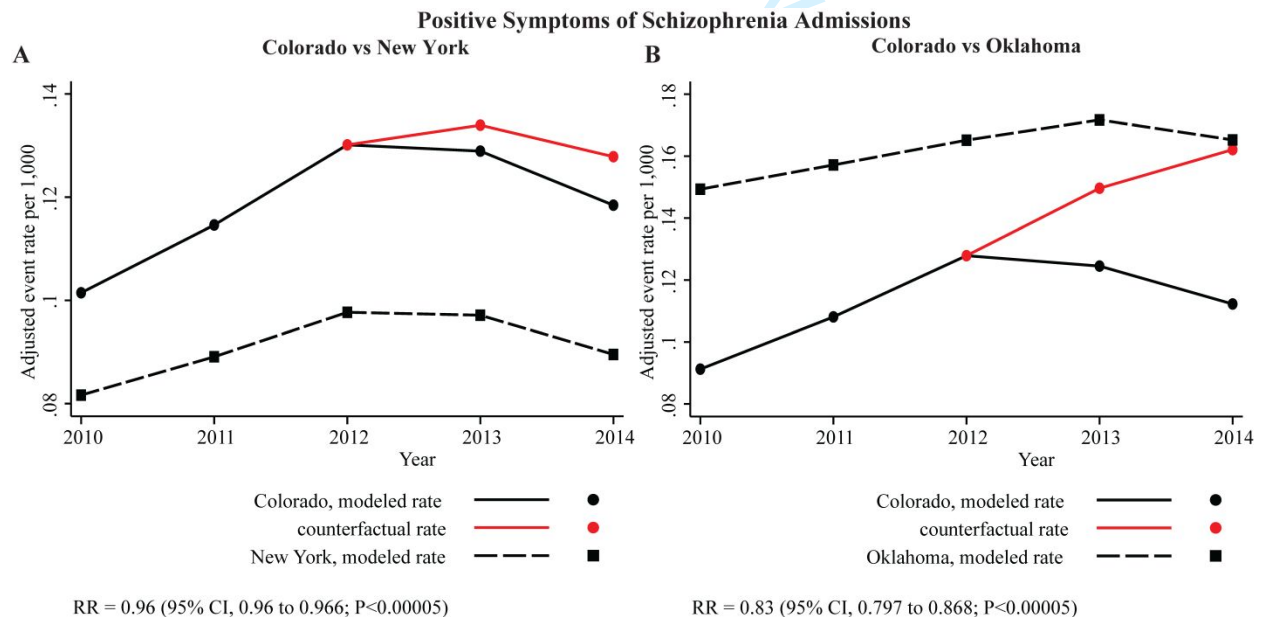

**eFigure 18.** Multivariate adjusted rates of admissions for bronchitis over 2010-2014 in Colorado compared with New York (A) and Oklahoma (B). RR = risk ratio; CI = confidence interval.

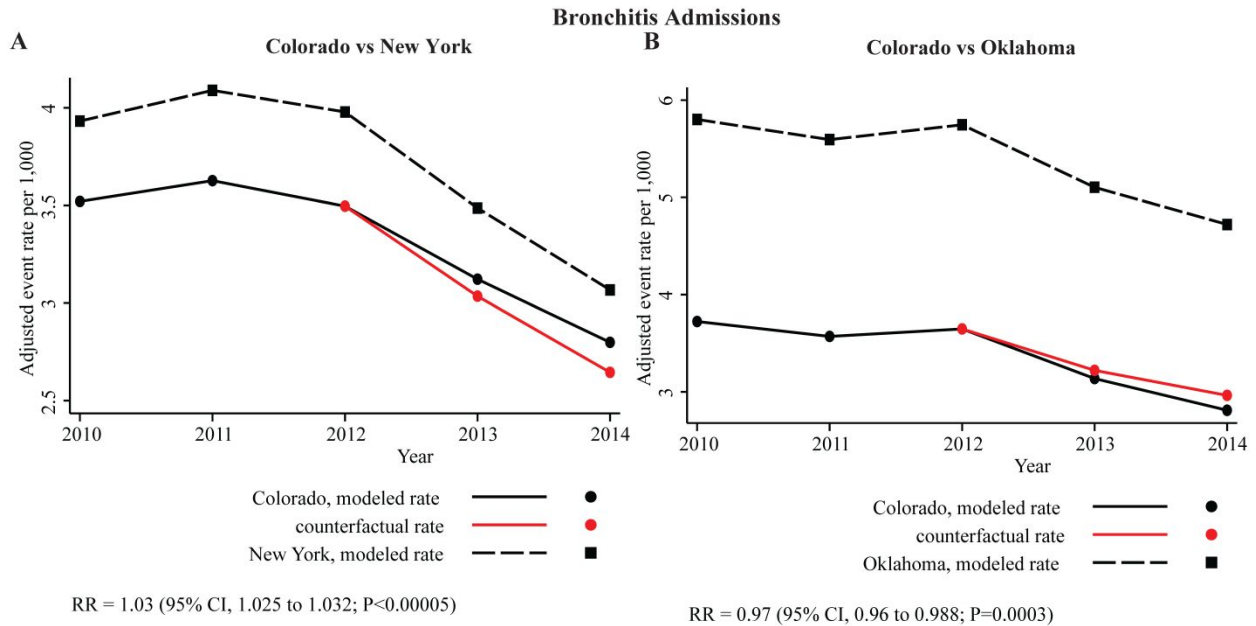

**eFigure 19.** Multivariate adjusted rates of admissions for abuse of other substances over 2010-2014 in Colorado compared with New York (A) and Oklahoma (B). RR = risk ratio; CI = confidence interval.

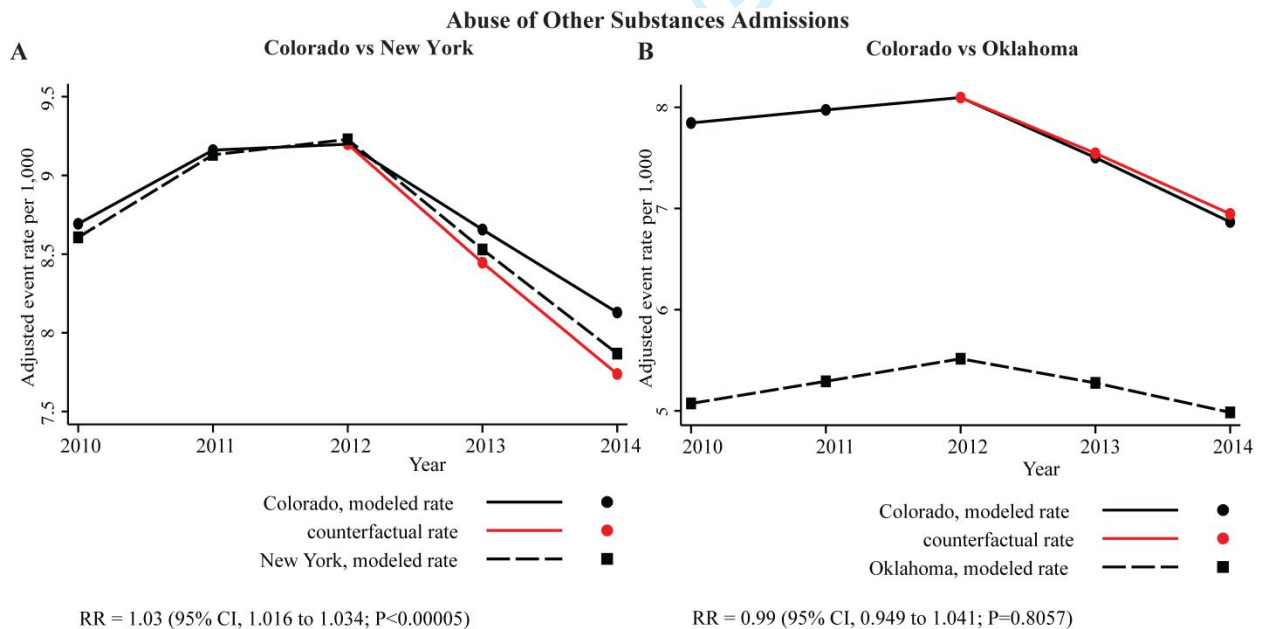

**eFigure 20.** Multivariate adjusted rates of admissions for nausea or vomiting over 2010-2014 in Colorado compared with New York (A) and Oklahoma (B). RR = risk ratio; CI = confidence interval.

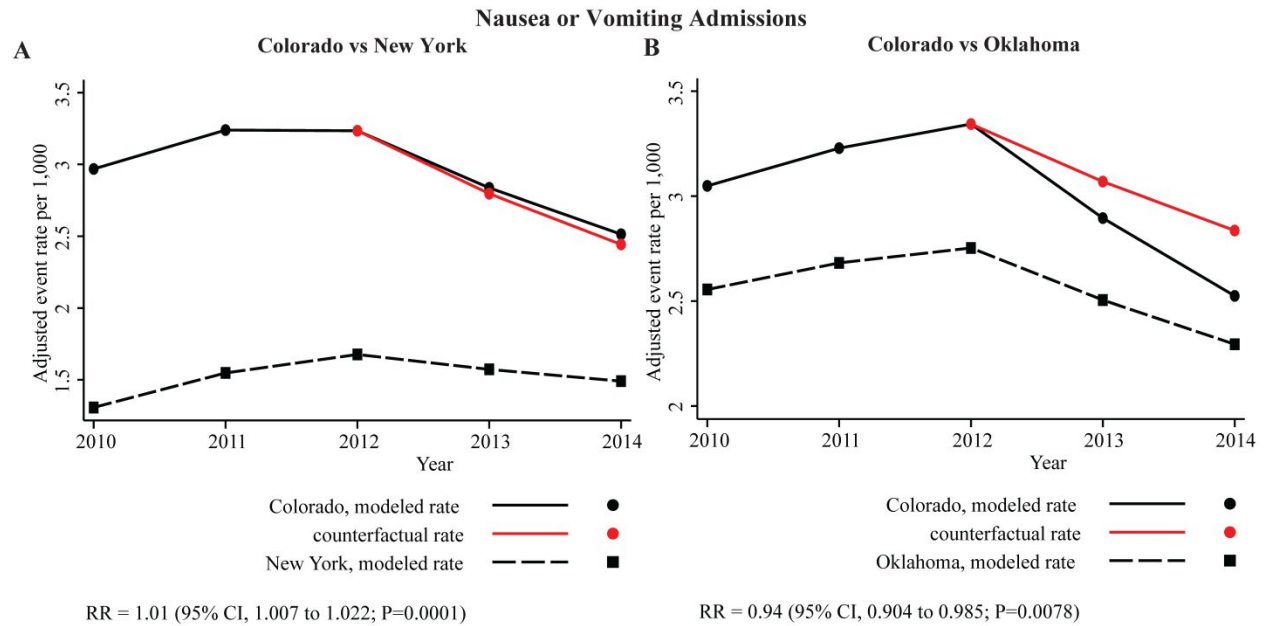

**eFigure 21.** Multivariate adjusted rates of admissions for chronic pain over 2010-2014 in Colorado compared with New York (A) and Oklahoma (B). RR = risk ratio; CI = confidence interval.

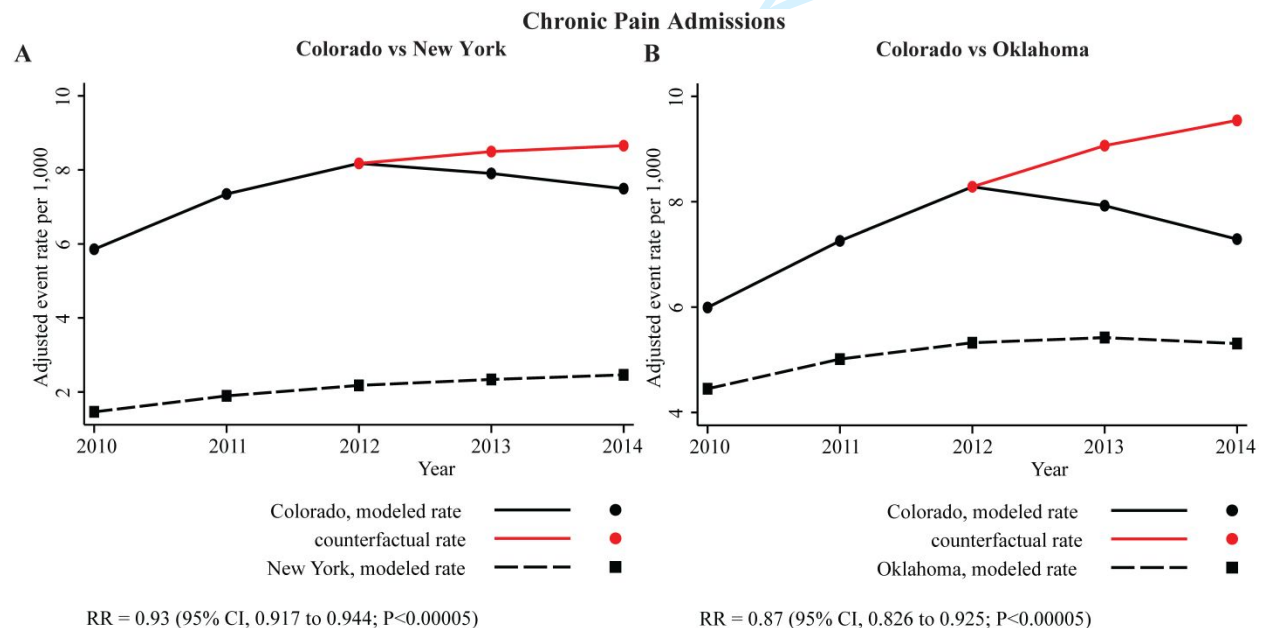

**eFigure 22.** Multivariate adjusted rates of admissions for spasticity over 2010-2014 in Colorado compared with New York (A) and Oklahoma (B). RR = risk ratio; CI = confidence interval.

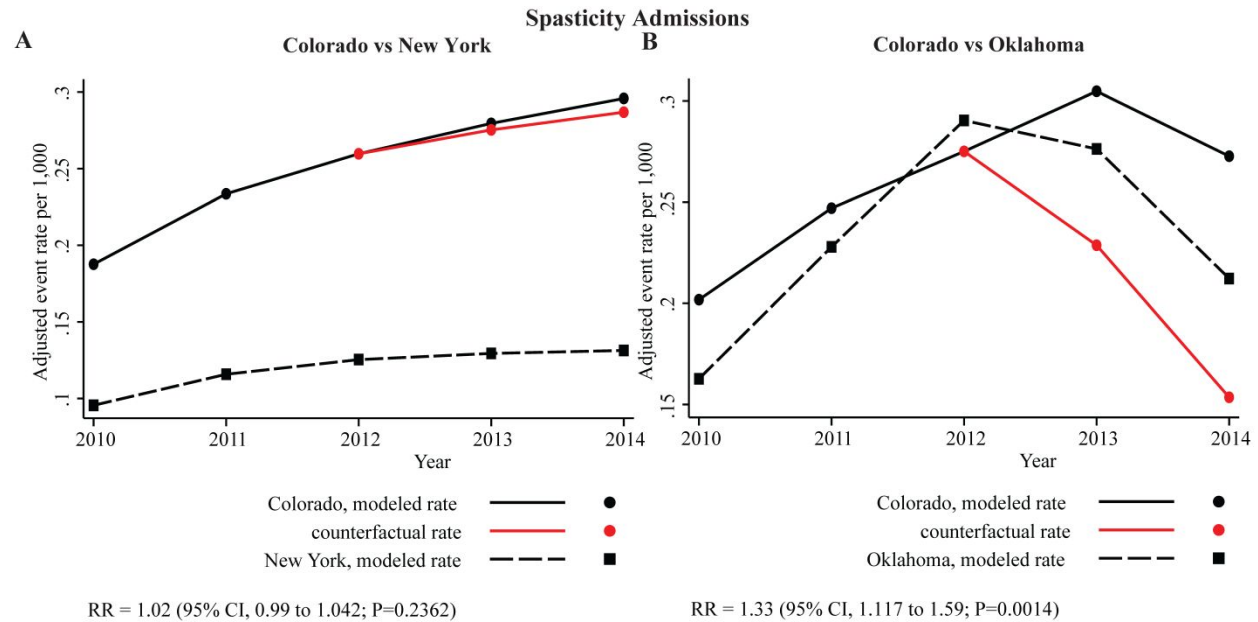

**eFigure 23.** Multivariate adjusted rates of admissions for unemployment/low income over 2010-2014 in Colorado compared with New York (A) and Oklahoma (B). RR = risk ratio; CI = confidence interval.

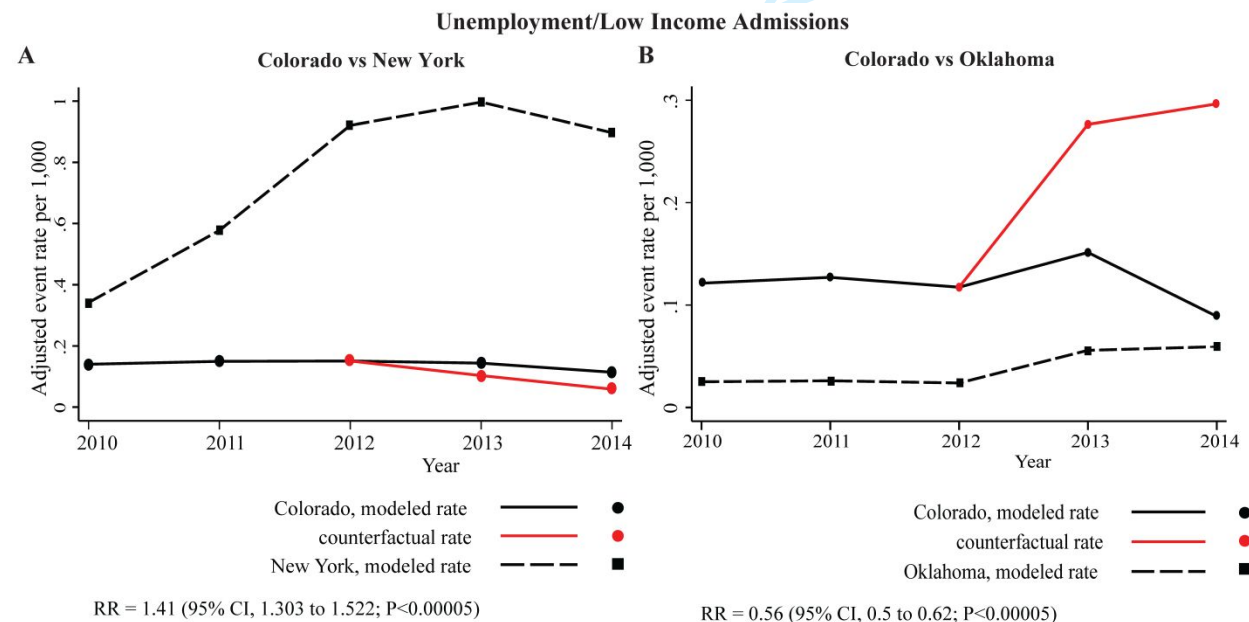



**eFigure 24.** Multivariate adjusted rates of admissions for social anxiety symptoms over 2010-2014 in Colorado compared with New York (A) and Oklahoma (B). RR = risk ratio; CI = confidence interval.

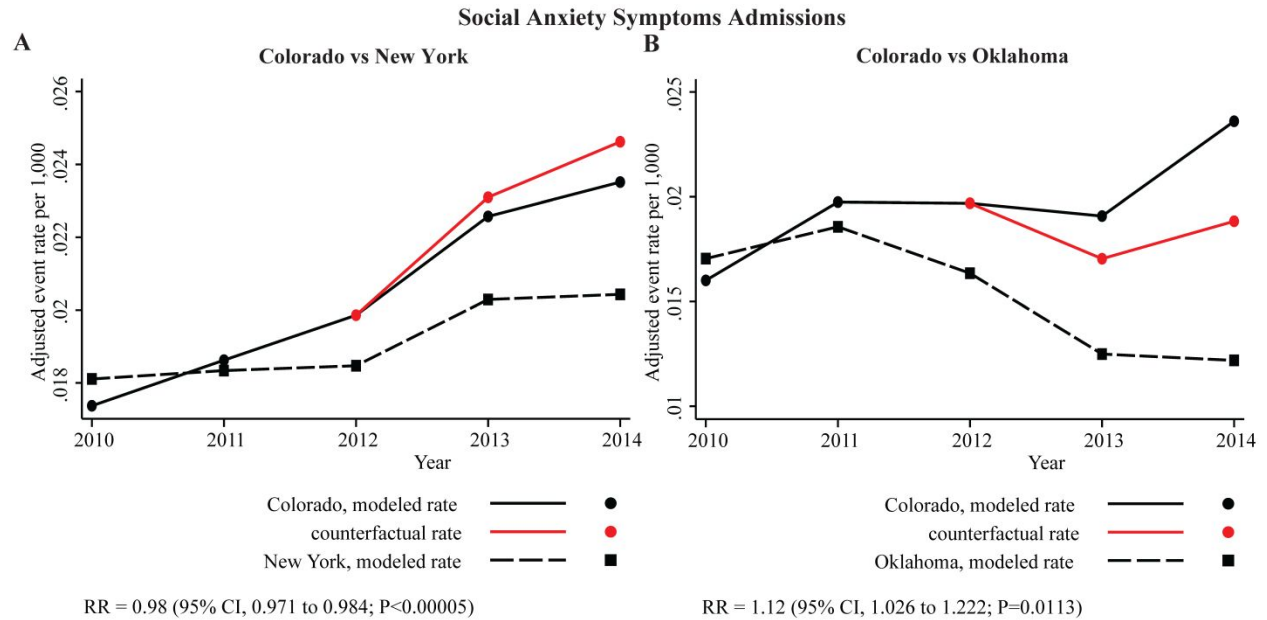

**eFigure 25.** Multivariate adjusted rates of admissions for short-term sleep disorders over 2010-2014 in Colorado compared with New York (A) and Oklahoma (B). RR = risk ratio; CI = confidence interval.

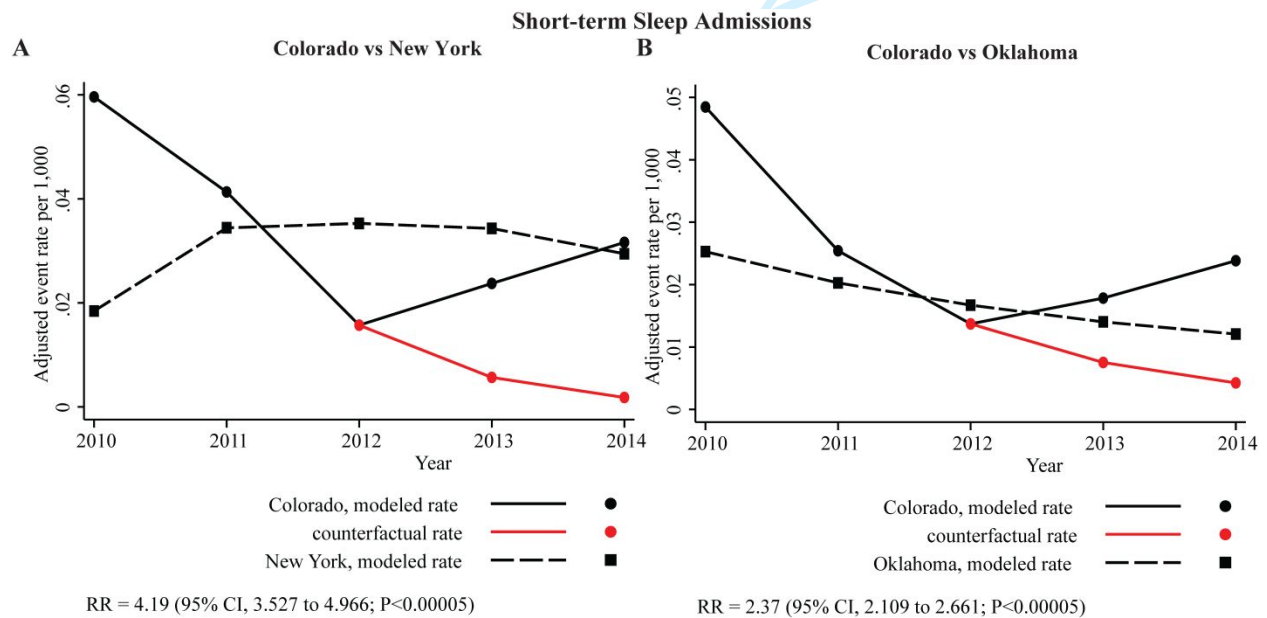

**eFigure 26.** Multivariate adjusted rates of admissions for Tourette's syndrome over 2010-2014 in Colorado compared with New York (A) and Oklahoma (B). RR = risk ratio; CI = confidence interval.

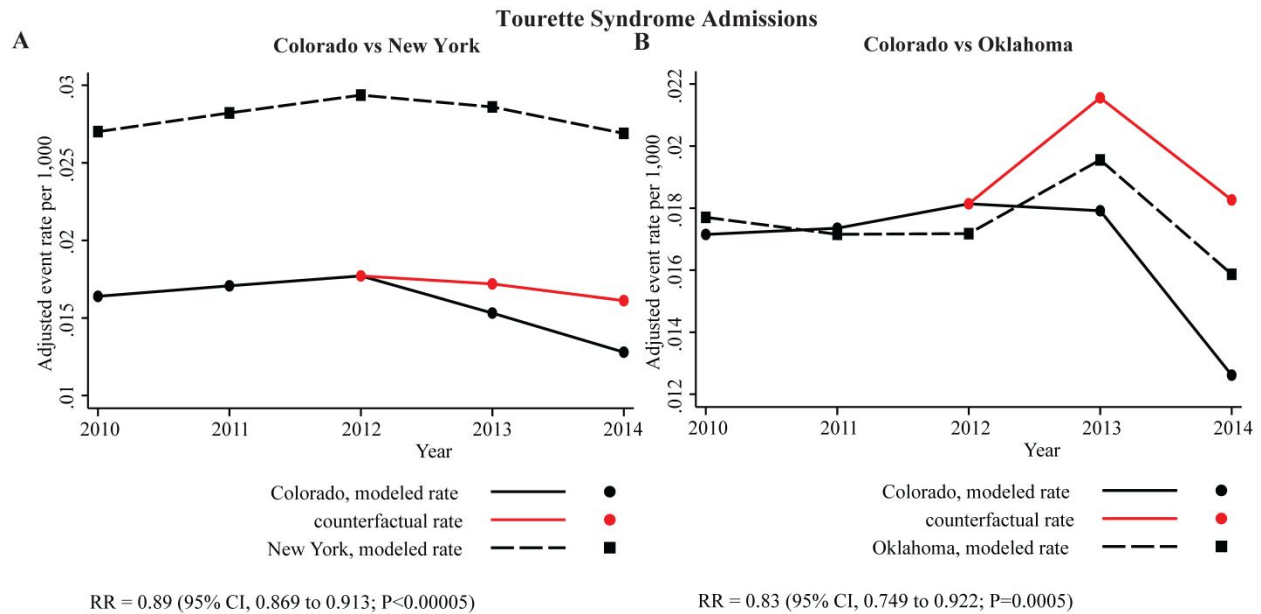

**eFigure 27.** Multivariate adjusted rates of admissions for increased appetite and weight gain over 2010-2014 in Colorado compared with New York (A) and Oklahoma (B). RR = risk ratio; CI = confidence interval.

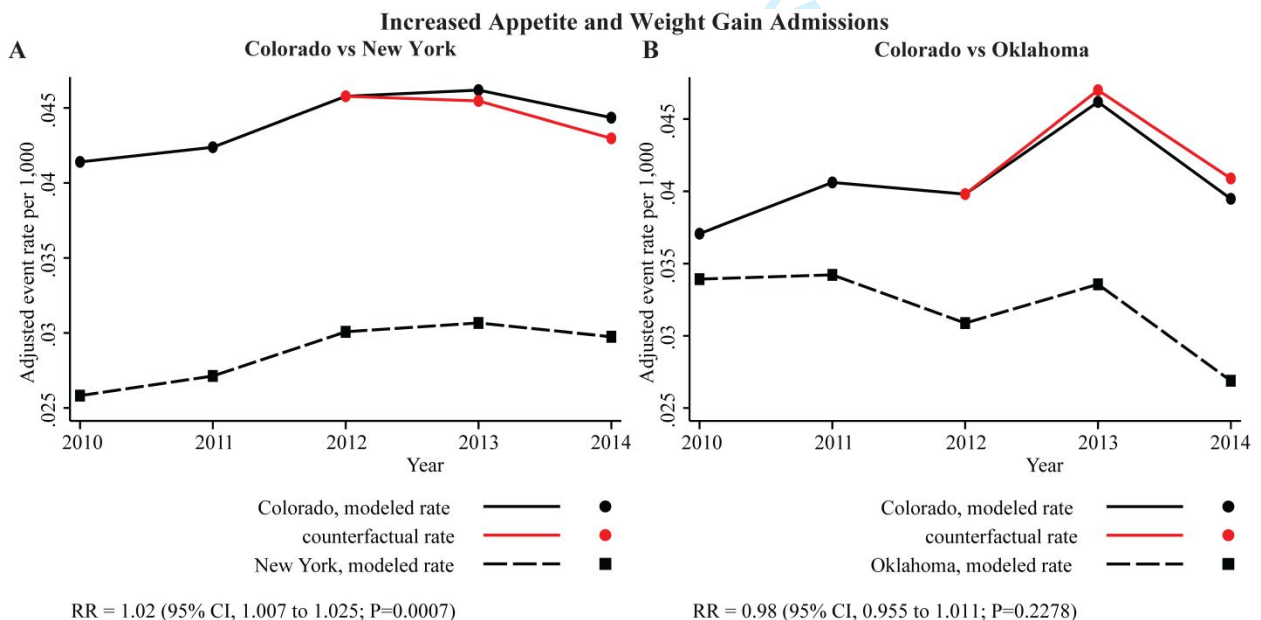

**eFigure 28.** Multivariate adjusted rates of admissions for tobacco use over 2010-2014 in Colorado compared with New York (A) and Oklahoma (B). RR = risk ratio; CI = confidence interval.

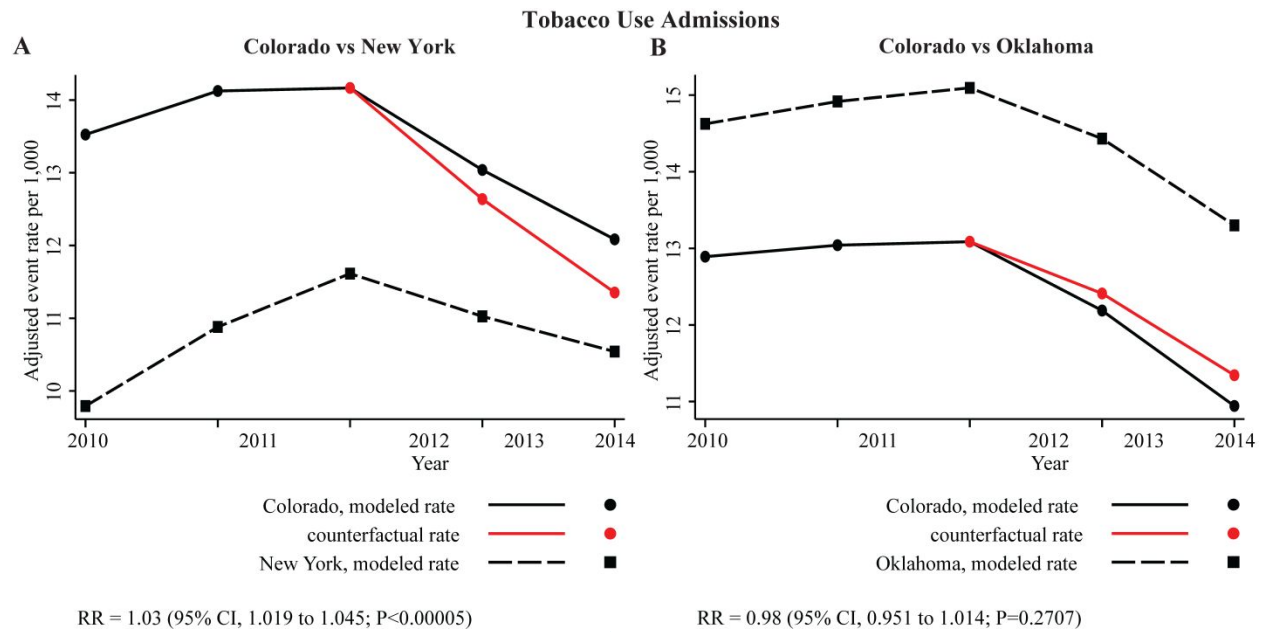

**eFigure 29.** Multivariate adjusted rates of admissions for lower offspring birthweight over 2010-2014 in Colorado compared with New York (A) and Oklahoma (B). RR = risk ratio; CI = confidence interval.

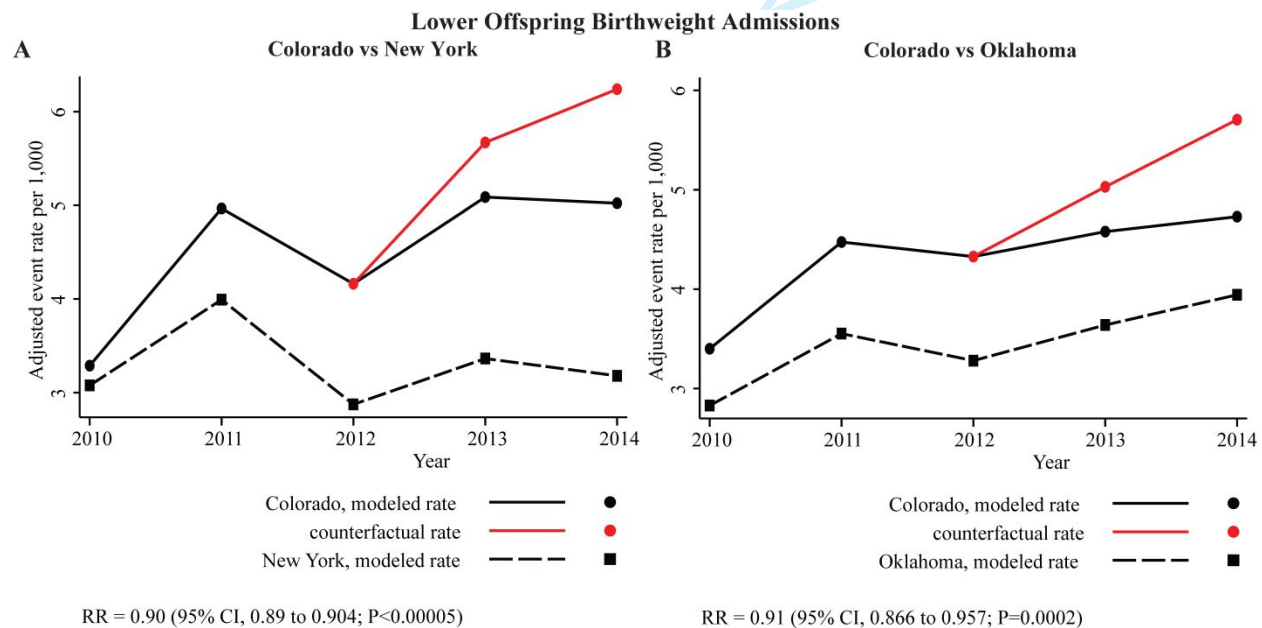



**eFigure 30.** Multivariate adjusted rates of admissions for maternal pregnancy complications over 2010-2014 in Colorado compared with New York (A) and Oklahoma (B). RR = risk ratio; CI = confidence interval.

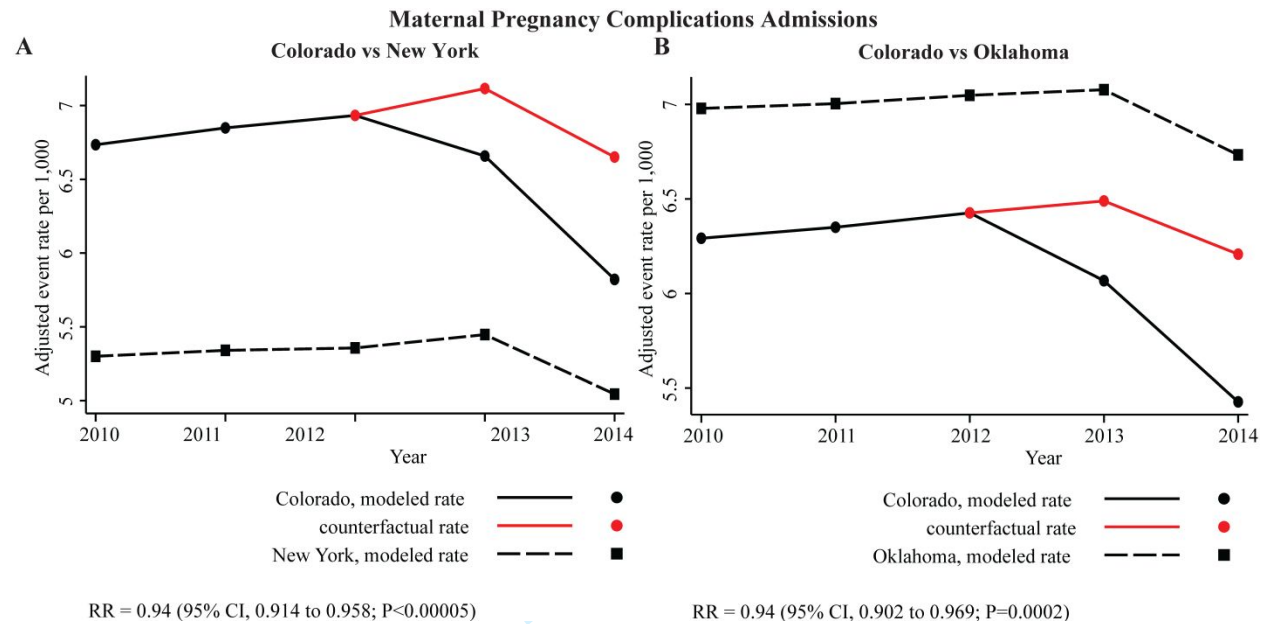

**eFigure 31.** Multivariate adjusted rates of admissions for non-seminoma-type testicular germ cell cancer over 2010-2014 in Colorado compared with New York (A) and Oklahoma (B). RR = risk ratio; CI = confidence interval.

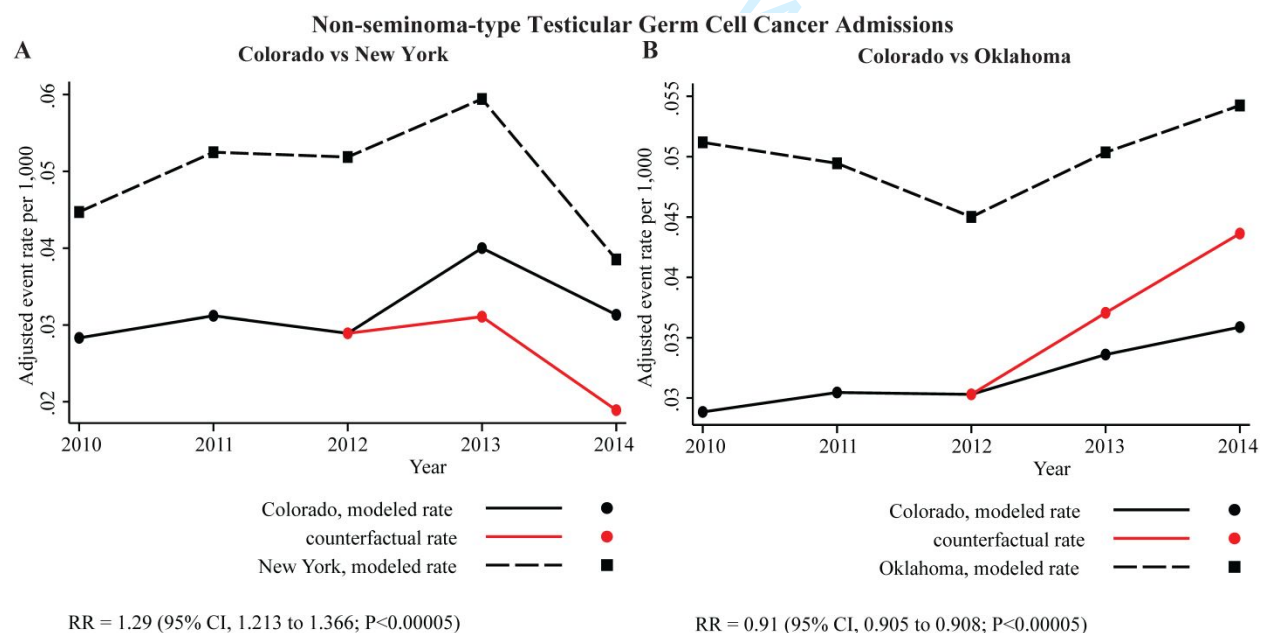

STROBE Statement—Checklist of items that should be included in reports of *cohort studies*

|                              | Item No | Recommendation                                                                                                                                                                                                                                                                                                         | Page No |
|------------------------------|---------|------------------------------------------------------------------------------------------------------------------------------------------------------------------------------------------------------------------------------------------------------------------------------------------------------------------------|---------|
| <b>Title and abstract</b>    | 1       | (a) Indicate the study's design with a commonly used term in the title or the abstract                                                                                                                                                                                                                                 | 1       |
|                              |         | (b) Provide in the abstract an informative and balanced summary of what was done and what was found                                                                                                                                                                                                                    | 2       |
| <b>Introduction</b>          |         |                                                                                                                                                                                                                                                                                                                        |         |
| Background/rationale         | 2       | Explain the scientific background and rationale for the investigation being reported                                                                                                                                                                                                                                   | 5       |
| Objectives                   | 3       | State specific objectives, including any prespecified hypotheses                                                                                                                                                                                                                                                       | 5       |
| <b>Methods</b>               |         |                                                                                                                                                                                                                                                                                                                        |         |
| Study design                 | 4       | Present key elements of study design early in the paper                                                                                                                                                                                                                                                                | 5, 6, 7 |
| Setting                      | 5       | Describe the setting, locations, and relevant dates, including periods of recruitment, exposure, follow-up, and data collection                                                                                                                                                                                        | 5, 6, 7 |
| Participants                 | 6       | (a) Give the eligibility criteria, and the sources and methods of selection of participants. Describe methods of follow-up<br>(b) For matched studies, give matching criteria and number of exposed and unexposed                                                                                                      | 5, 6    |
| Variables                    | 7       | Clearly define all outcomes, exposures, predictors, potential confounders, and effect modifiers. Give diagnostic criteria, if applicable                                                                                                                                                                               | 6, 7    |
| Data sources/<br>measurement | 8*      | For each variable of interest, give sources of data and details of methods of assessment (measurement). Describe comparability of assessment methods if there is more than one group                                                                                                                                   | 6, 7    |
| Bias                         | 9       | Describe any efforts to address potential sources of bias                                                                                                                                                                                                                                                              | 7, 8    |
| Study size                   | 10      | Explain how the study size was arrived at                                                                                                                                                                                                                                                                              | 5, 6    |
| Quantitative variables       | 11      | Explain how quantitative variables were handled in the analyses. If applicable, describe which groupings were chosen and why                                                                                                                                                                                           | 7, 8, 9 |
| Statistical methods          | 12      | (a) Describe all statistical methods, including those used to control for confounding<br>(b) Describe any methods used to examine subgroups and interactions<br>(c) Explain how missing data were addressed<br>(d) If applicable, explain how loss to follow-up was addressed<br>(e) Describe any sensitivity analyses | 7, 8, 9 |
| <b>Results</b>               |         |                                                                                                                                                                                                                                                                                                                        |         |
| Participants                 | 13*     | (a) Report numbers of individuals at each stage of study—eg numbers potentially eligible, examined for eligibility, confirmed eligible, included in the study, completing follow-up, and analysed<br>(b) Give reasons for non-participation at each stage<br>(c) Consider use of a flow diagram                        | 9       |
| Descriptive data             | 14*     | (a) Give characteristics of study participants (eg demographic, clinical, social) and information on exposures and potential confounders<br>(b) Indicate number of participants with missing data for each variable of interest                                                                                        | 9       |

1  
2  
3  
4  
5  
6  
7  
8  
9  
10  
11  
12  
13  
14  
15  
16  
17  
18  
19  
20  
21  
22  
23  
24  
25  
26  
27  
28  
29  
30  
31  
32  
33  
34  
35  
36  
37  
38  
39  
40  
41  
42  
43  
44  
45  
46  
47  
48  
49  
50  
51  
52  
53  
54  
55  
56  
57  
58  
59  
60

(c) Summarise follow-up time (eg, average and total amount)

|              |     |                                                                |   |
|--------------|-----|----------------------------------------------------------------|---|
| Outcome data | 15* | Report numbers of outcome events or summary measures over time | 9 |
|--------------|-----|----------------------------------------------------------------|---|

For peer review only

|    |                          |    |                                                                                                                                                                                                              |                  |
|----|--------------------------|----|--------------------------------------------------------------------------------------------------------------------------------------------------------------------------------------------------------------|------------------|
| 1  | Main results             | 16 | (a) Give unadjusted estimates and, if applicable, confounder-adjusted estimates and their precision (eg, 95% confidence interval). Make clear which confounders were adjusted for and why they were included | 10,<br>11,<br>12 |
| 2  |                          |    | (b) Report category boundaries when continuous variables were categorized                                                                                                                                    |                  |
| 3  |                          |    | (c) If relevant, consider translating estimates of relative risk into absolute risk for a meaningful time period                                                                                             |                  |
| 4  |                          |    |                                                                                                                                                                                                              |                  |
| 5  |                          |    |                                                                                                                                                                                                              |                  |
| 6  |                          |    |                                                                                                                                                                                                              |                  |
| 7  |                          |    |                                                                                                                                                                                                              |                  |
| 8  |                          |    |                                                                                                                                                                                                              |                  |
| 9  | Other analyses           | 17 | Report other analyses done—eg analyses of subgroups and interactions, and sensitivity analyses                                                                                                               | 9                |
| 10 |                          |    |                                                                                                                                                                                                              |                  |
| 11 | <b>Discussion</b>        |    |                                                                                                                                                                                                              |                  |
| 12 |                          |    |                                                                                                                                                                                                              |                  |
| 13 | Key results              | 18 | Summarise key results with reference to study objectives                                                                                                                                                     | 12,<br>13        |
| 14 |                          |    |                                                                                                                                                                                                              |                  |
| 15 | Limitations              | 19 | Discuss limitations of the study, taking into account sources of potential bias or imprecision. Discuss both direction and magnitude of any potential bias                                                   | 13,<br>14        |
| 16 |                          |    |                                                                                                                                                                                                              |                  |
| 17 | Interpretation           | 20 | Give a cautious overall interpretation of results considering objectives, limitations, multiplicity of analyses, results from similar studies, and other relevant evidence                                   | 14,<br>15        |
| 18 |                          |    |                                                                                                                                                                                                              |                  |
| 19 |                          |    |                                                                                                                                                                                                              |                  |
| 20 | Generalisability         | 21 | Discuss the generalisability (external validity) of the study results                                                                                                                                        | 14,<br>15        |
| 21 |                          |    |                                                                                                                                                                                                              |                  |
| 22 | <b>Other information</b> |    |                                                                                                                                                                                                              |                  |
| 23 |                          |    |                                                                                                                                                                                                              |                  |
| 24 | Funding                  | 22 | Give the source of funding and the role of the funders for the present study and, if applicable, for the original study on which the present article is based                                                | 16               |
| 25 |                          |    |                                                                                                                                                                                                              |                  |

\*Give information separately for exposed and unexposed groups.

**Note:** An Explanation and Elaboration article discusses each checklist item and gives methodological background and published examples of transparent reporting. The STROBE checklist is best used in conjunction with this article (freely available on the Web sites of PLoS Medicine at <http://www.plosmedicine.org/>, Annals of Internal Medicine at <http://www.annals.org/>, and Epidemiology at <http://www.epidem.com/>). Information on the STROBE Initiative is available at <http://www.strobe-statement.org>.

# BMJ Open

## Does Cannabis Legalization Change Healthcare Utilization? A Population-based Study Using the Healthcare Cost and Utilization Project

|                                 |                                                                                                                                                                                                                                                                                                                                                                                                                                                                                                                                                                                                                                                                                                                                                           |
|---------------------------------|-----------------------------------------------------------------------------------------------------------------------------------------------------------------------------------------------------------------------------------------------------------------------------------------------------------------------------------------------------------------------------------------------------------------------------------------------------------------------------------------------------------------------------------------------------------------------------------------------------------------------------------------------------------------------------------------------------------------------------------------------------------|
| Journal:                        | <i>BMJ Open</i>                                                                                                                                                                                                                                                                                                                                                                                                                                                                                                                                                                                                                                                                                                                                           |
| Manuscript ID                   | bmjopen-2018-027432.R1                                                                                                                                                                                                                                                                                                                                                                                                                                                                                                                                                                                                                                                                                                                                    |
| Article Type:                   | Research                                                                                                                                                                                                                                                                                                                                                                                                                                                                                                                                                                                                                                                                                                                                                  |
| Date Submitted by the Author:   | 26-Feb-2019                                                                                                                                                                                                                                                                                                                                                                                                                                                                                                                                                                                                                                                                                                                                               |
| Complete List of Authors:       | Delling, Francesca; University of California, San Francisco<br>Vittinghoff, Eric; University of California, San Francisco,<br>Dewland, Thomas; Oregon Health & Science University, Medicine<br>Pletcher, Mark; University of California, San Francisco, Epidemiology and<br>Biostatistics<br>Olgin, J; University of California San Francisco<br>Nah, Gregory; University of California San Francisco<br>Aschbacher, Kirstin; University of California, San Francisco<br>Fang, Christina; University of California, San Francisco<br>Lee, Emily; University of California, San Francisco<br>Fan, Shannon; University of California, San Francisco<br>Kazi, Dhruv; University of California San Francisco, Medicine (Cardiology)<br>Marcus, Gregory; UCSF, |
| <b>Primary Subject Heading</b>: | Epidemiology                                                                                                                                                                                                                                                                                                                                                                                                                                                                                                                                                                                                                                                                                                                                              |
| Secondary Subject Heading:      | Public health                                                                                                                                                                                                                                                                                                                                                                                                                                                                                                                                                                                                                                                                                                                                             |
| Keywords:                       | Healthcare utilization, Health policy < HEALTH SERVICES<br>ADMINISTRATION & MANAGEMENT, Cannabis legalization                                                                                                                                                                                                                                                                                                                                                                                                                                                                                                                                                                                                                                             |
|                                 |                                                                                                                                                                                                                                                                                                                                                                                                                                                                                                                                                                                                                                                                                                                                                           |

SCHOLARONE™  
Manuscripts

1  
2  
3 1 **Does Cannabis Legalization Change Healthcare Utilization? A Population-based**  
4  
5 2 **Study Using the Healthcare Cost and Utilization Project**  
6  
7  
8 3

9  
10 4 Francesca N. Delling, MD, MPH;<sup>1</sup> Eric Vittinghoff, PhD;<sup>1</sup> Thomas A. Dewland, MD;<sup>2</sup>  
11  
12 5 Mark J. Pletcher, MD, MPH;<sup>1</sup> Jeffrey E. Olgin, MD;<sup>1</sup> Gregory Nah, MA;<sup>1</sup> Kirstin  
13  
14 6 Aschbacher, PhD;<sup>1</sup> Christina D. Fang, BA;<sup>1</sup> Emily S. Lee, BA;<sup>1</sup> Shannon M. Fan, BA;<sup>1</sup>  
15  
16 7 Dhruv S. Kazi, MD, MS;<sup>1</sup> and Gregory M. Marcus, MD, MAS.<sup>1</sup>  
17  
18

19 8 <sup>1</sup>Department of Medicine, Division of Cardiology, University of California, San Francisco,  
20  
21 San Francisco, CA, USA  
22  
23

24 10 <sup>2</sup>Knight Cardiovascular Institute, Oregon Health & Science University, Portland, OR,  
25  
26 11 USA  
27  
28  
29  
30

31 13 **Corresponding Author:** Gregory M. Marcus, MD, MAS, Division of Cardiology,  
32  
33 14 University of California, San Francisco, 505 Parnassus Avenue, Room M1180B, San  
34  
35 15 Francisco, CA 94117 ([marcusg@medicine.ucsf.edu](mailto:marcusg@medicine.ucsf.edu)).  
36  
37  
38  
39

40 17 The Corresponding Author has the right to grant on behalf of all authors and does grant  
41  
42 18 on behalf of all authors, an exclusive license (or non-exclusive for government  
43  
44 19 employees) on a worldwide basis to the BMJ Publishing Group Ltd to permit this article  
45  
46 20 (if accepted) to be published in BMJ editions and any other BMJ PGL products and  
47  
48 21 sublicenses such use and exploit all subsidiary rights, as set out in our license.  
49  
50  
51  
52

53 23 **Total Word Count:** 3760  
54  
55  
56  
57  
58  
59  
60

1  
2  
3 25 **ABSTRACT**  
4

5 26 **OBJECTIVE:** To assess the effect of cannabis legalization on health effects and healthcare  
6  
7 27 utilization in Colorado (CO), the first state to legalize recreational cannabis, when compared  
8  
9 28 with 2 control states, New York (NY) and Oklahoma (OK).  
10

11  
12 29 **DESIGN:** We used the 2010-2014 Healthcare Cost and Utilization Project (HCUP) inpatient  
13  
14 30 databases to compare changes in rates of healthcare utilization and diagnoses in CO versus NY  
15  
16 31 and OK.  
17

18  
19 32 **SETTING:** Population-based, inpatient.  
20

21  
22 33 **PARTICIPANTS:** HCUP state-wide data comprising over 28 million individuals and over 16  
23  
24 34 million hospitalizations across 3 states.  
25

26 35 **MAIN OUTCOME MEASURES:** We used International Classification of Diseases-9<sup>th</sup> Edition  
27  
28 36 (ICD-9) codes to assess changes in healthcare utilization specific to various medical diagnoses  
29  
30 37 potentially treated by or exacerbated by cannabis. Diagnoses were classified based on weight  
31  
32 38 of evidence from the National Academy of Science (NAS). Negative binomial models were used  
33  
34 39 to compare rates of admissions between states.  
35  
36

37 40 **RESULTS:** In CO compared to NY and OK, respectively, cannabis abuse increased (risk ratio  
38  
39 41 [RR], 1.27; 95% confidence interval [CI], 1.26 to 1.28 and RR 1.16; 95% CI 1.15 to 1.17; both  
40  
41 42  $P<0.0005$ ) post-legalization. In CO, there was a reduction in total admissions but only when  
42  
43 43 compared to OK (RR 0.97; 95% CI 0.96 to 0.98;  $P<0.0005$ ). Length of stay and costs did not  
44  
45 44 change significantly in CO compared to NY or OK. Post-legalization changes most consistent  
46  
47 45 with NAS-based evidence included an increase in motor vehicle accidents, alcohol abuse,  
48  
49 46 overdose injury, and a reduction in chronic pain (all  $P<0.05$  compared to each control state).  
50  
51

52  
53 47 **CONCLUSIONS:** Recreational cannabis legalization is associated with neutral effects on  
54  
55 48 healthcare utilization. In line with previously established evidence, cannabis liberalization is  
56  
57

1  
2  
3  
4  
5  
6  
7  
8  
9  
10  
11  
12  
13  
14  
15  
16  
17  
18  
19  
20  
21  
22  
23  
24  
25  
26  
27  
28  
29  
30  
31  
32  
33  
34  
35  
36  
37  
38  
39  
40  
41  
42  
43  
44  
45  
46  
47  
48  
49  
50  
51  
52  
53  
54  
55  
56  
57  
58  
59  
60

49 linked to an increase in motor vehicle accidents, alcohol abuse, overdose injuries and a  
50 decrease in chronic pain. Such population-level effects may help guide future decisions  
51 regarding cannabis use, prescription, and policy.

For peer review only



### 53 **Strengths and limitations of this study**

- 54 • The study focuses on the impact of recreational cannabis legalization on health  
55 care utilization instead of its legal or societal effects
- 56 • This study utilizes HCUP data comprising over 28 million individuals and over 16  
57 million hospitalizations
- 58 • Stringent standards were employed to address possible false positives due to  
59 multiple hypotheses testing
- 60 • Follow up data after the 2012 Amendment 64 only includes two subsequent  
61 years
- 62 • Physician coding with ICD-9 codes does not capture potentially important  
63 mediators related to cannabis use

## 64 INTRODUCTION

65 Over 147 million people, or 2.5 percent of the world's population, use cannabis  
66 (marijuana),<sup>1</sup> and more than 20 million Americans have reported the use of cannabis in  
67 the past 30 days.<sup>1</sup> Because cannabis use is a federal crime, clinical studies have been  
68 challenging to pursue, resulting in substantial knowledge gaps regarding actual health  
69 consequences. Thirty states and the District of Columbia now allow cannabis for the  
70 treatment of medical conditions.<sup>2</sup> Of these, 9 have recently legalized cannabis for  
71 recreational use. Given such pervasive policy changes, understanding potential shifts in  
72 healthcare utilization is vital.

73 Recently, an extensive and rigorous summary of the current evidence on health  
74 effects of cannabis was developed by a committee of experts appointed by the US  
75 National Academy of Science (NAS) focusing on systematic reviews and high-quality  
76 primary research.<sup>3</sup> The health endpoints assessed in the NAS summary included  
77 oncologic, cardiometabolic, respiratory, immunologic, and psychiatric disorders as well  
78 as outcomes related to injury and death (i.e. motor-vehicle accidents). While the NAS  
79 summary represents a valuable starting place that makes use of the available data, we  
80 do not yet know whether that evidence, based largely on small studies, will translate into  
81 real-world ramifications after legalization of recreational cannabis.

82 On December 10, 2012, Colorado enacted *Colorado Amendment 64*, legalizing  
83 recreational cannabis. Following this date, adults aged 21 or older could grow cannabis  
84 plants privately, legally possess all cannabis from these plants, and give cannabis as a  
85 gift to other adults aged 21 or older.<sup>4</sup> After January 1, 2014, recreational cannabis could  
86 be legally purchased in retail stores.<sup>5</sup> We hypothesized that changes in healthcare

1  
2  
3 87 utilization and diagnoses most consistent with NAS-based evidence occur when access  
4  
5 88 to recreational cannabis becomes liberalized.  
6  
7  
8 89

9  
10 90 **METHODS**

11  
12 91 We used the Agency for Healthcare Research and Quality (AHRQ)-funded Healthcare  
13  
14 92 Cost and Utilization Project (HCUP) database to measure inpatient healthcare utilization  
15  
16 93 and diagnoses in Colorado (CO) between 2010 and 2014. HCUP is a state-wide  
17  
18 94 database containing all listed inpatient diagnoses and procedures, discharge status,  
19  
20 95 patient demographics, and charges for all patients, regardless of payer (e.g., Medicare,  
21  
22 96 Medicaid, private insurance, uninsured).  
23  
24  
25

26 97 Comparisons were made with 2 control states in order to address possible secular  
27  
28 98 trends. New York (NY), the most populous state with inpatient HCUP data available up  
29  
30 99 to 2014 was selected, and, to counter this coastal and largely urban state, we also  
31  
32 100 selected Oklahoma (OK), a predominately rural state directly adjacent to CO with HCUP  
33  
34 101 hospitalization data up to 2014. We used separate HCUP databases for CO, NY and  
35  
36 102 OK. Unlike the National Inpatient Sample (NIS), which is (by definition) a sample, these  
37  
38 103 state-specific databases include data from every actual admission, providing direct and  
39  
40 104 complete information regarding all healthcare utilization. Both primary and secondary  
41  
42 105 diagnoses were extracted from each HCUP database for each admission used: up to 30  
43  
44 106 ICD-9 codes in CO, 25 in NY, and 16 in OK were provided for each encounter. Annual  
45  
46 107 demographic data, including age, sex, and race, was obtained from the United States  
47  
48 108 Census Bureau. Only month and year were available in all HCUP databases; as  
49  
50 109 legalization took effect on December 10, 2012, hospitalizations following December,  
51  
52  
53  
54  
55  
56  
57  
58  
59  
60

1  
2  
3 110 2012 were considered “after” enactment of the law. Patients with missing information on  
4  
5 111 age, sex, race, and year of encounter were excluded.

6  
7 112 Age, sex, race, income level, and insurance payer were recorded at each  
8  
9 113 healthcare encounter. Hispanic ethnicity was not coded in the OK State Department of  
10  
11 114 Health data source. In order to use comparable categorizations across the 3 states, we  
12  
13 115 separated race into white, black, Native American, and other. In addition to the  
14  
15 116 population-level variables age, sex and race, we obtained the following covariates at the  
16  
17 117 individual level for each age, sex and race population strata: 1) income level 2)  
18  
19 118 proportion of HCUP individuals living in an urban versus rural setting, 3) with tobacco  
20  
21 119 use, 4) alcohol abuse, and 5) psychiatric disorders. The latter 3 covariates were  
22  
23 120 available from ICD-9 codes. Income level was categorized by quartiles using the  
24  
25 121 median household income for each patient’s ZIP code. Income level was not available  
26  
27 122 for OK.

28  
29 123 We first performed a validation analysis to assess changes in cannabis abuse  
30  
31 124 diagnoses in CO after versus before recreational cannabis legalization and compared  
32  
33 125 those rates to changes in NY and OK over the same time period. To determine changes  
34  
35 126 in overall healthcare utilization, we assessed changes in total number of  
36  
37 127 hospitalizations, length of inpatient stay, and healthcare costs. We estimated the cost of  
38  
39 128 each hospitalization by multiplying the charges by a cost-to-charge ratio for the  
40  
41 129 admitting hospital for the given year. For NY and CO, we used the all-payer cost-to-  
42  
43 130 charge ratios provided by HCUP. When the all-payer cost-to-charge ratio was missing,  
44  
45 131 we applied the average cost-to-charge ratio particular to state and year. As HCUP does  
46  
47 132 not provide cost-to-charge ratios for OK, we assumed a constant state-wide cost-to-  
48  
49  
50  
51  
52  
53  
54  
55  
56  
57  
58  
59  
60

1  
2  
3 133 charge ratio (0.3119 as derived from the Institute for Health and Socio-Economic Policy  
4  
5 134 calculations of federal cost reports) to estimate healthcare costs in OK;<sup>6</sup> we then  
6  
7 135 conducted a sensitivity analysis setting the cost-to-charge ratio for OK to equal to the  
8  
9 136 average for NY and CO for the corresponding year. See online supplementary  
10  
11 137 eMethods and eTable 1 for additional details.

12  
13  
14 138 We used International Classification of Diseases-9<sup>th</sup> Edition (ICD-9) codes  
15  
16 139 (eTable 2) to assess changes in healthcare utilization specific to various medical  
17  
18 140 diagnoses potentially treated by or exacerbated by cannabis use as identified by the  
19  
20 141 NAS summary. For each health endpoint of interest in the NAS review, the weight of  
21  
22 142 evidence regarding the statistical association of recreational cannabis with a specific  
23  
24 143 health endpoint or the therapeutic use of cannabis had previously been categorized into  
25  
26 144 substantial, moderate, limited or no evidence.<sup>3</sup> We opted to focus on NAS health  
27  
28 145 endpoints with either substantial or moderate evidence.

29  
30  
31 146 Because diagnoses of alcohol or other substance abuse “in remission” may have  
32  
33 147 been incidental and not directly responsible for the hospitalization, we performed a  
34  
35 148 sensitivity analysis where we removed “in remission” diagnoses from the group of ICD-9  
36  
37 149 codes defining alcohol abuse and other substance abuse (eTable 2).

38  
39  
40 150 Finally, to take into account the additional effect of recreational cannabis related  
41  
42 151 to availability in retail stores we performed sensitivity analyses for all health care  
43  
44 152 utilization (total number of admissions, length of stay, costs) and NAS-evidence based  
45  
46 153 outcomes investigations utilizing January 1, 2014 as the change of policy date.

47  
48  
49 154 Certification to use de-identified HCUP data was obtained from the University of  
50  
51 155 California, San Francisco Committee on Human Research.

156

**157 Statistical Analysis**

158 Demographic and lifestyle characteristics are presented as mean  $\pm$  standard deviation  
159 (SD) or n (% of total admissions) and were compared between states using linear,  
160 logistic, and multinomial models as appropriate. Rates of admissions for NAS diagnoses  
161 (with the population size as the denominator) were compared between states using  
162 negative binomial models.

163 To assess the effects of recreational cannabis legalization, we used negative  
164 binomial models for the number of admissions, both overall and for particular  
165 diagnoses, with the log of the subgroup population sizes as an offset and the use of  
166 robust standard errors. Analogous linear models were utilized for length of stay and  
167 cost, which were both log-transformed in order to meet normality assumptions. All  
168 models were adjusted for age, race, sex, income level, urbanicity, alcohol abuse,  
169 tobacco use and psychiatric disorders. Adjustment for psychiatric disorders was not  
170 performed in the presence of a psychiatric outcome. In order to relax the linearity  
171 assumption, each 5-year age range was included as a separate category. To flexibly  
172 model secular patterns, year was included as a categorical rather than continuous  
173 variable (with a category for each year between 2010 and 2014). The crucial predictors  
174 in our model included an indicator for CO (versus the comparison state) and interactions  
175 of this indicator with 2 continuous linear spline basis functions, year-2012, and max (0,  
176 year-2012). The main effect for CO estimated the between-state risk ratio (RR) in 2012,  
177 the first interaction estimated the slope of the between-state RR in 2010-12, and the  
178 second estimated the change in slope after 2012. The first interaction was used to

1  
2  
3 179 project the counterfactual 2013-2014 rates in CO that would be expected in the absence  
4  
5 180 of legalization, while the second was used to capture the legalization effect. Like a  
6  
7 181 standard interrupted time series (ITS) model, our model assumed that the between-  
8  
9 182 state RR changed linearly at different rates before and after the intervention, but used  
10  
11 183 the categorical indicator for year to relax the standard ITS assumption of piecewise  
12  
13 184 linear trends in the underlying state-specific rates, substantially improving model fit. The  
14  
15 185 same model was used in the sensitivity analysis using January 1, 2014 (date of legal  
16  
17 186 retail cannabis sales) as change of policy date.

18  
19  
20  
21 187 A 2-tailed  $P < 0.05$  was considered statistically significant for the validation  
22  
23 188 analysis (cannabis use), and analyses related to overall healthcare utilization. In order  
24  
25 189 to minimize false positive results and to account for secular trends that might differ  
26  
27 190 across different populations, we assessed for validation in comparisons versus NY and  
28  
29 191 then OK separately.

30  
31  
32  
33 192 In order to address possible false positives due to multiple hypotheses testing in  
34  
35 193 assessing the diagnoses with moderate or substantial evidence described in the NAS  
36  
37 194 document, we employed stringent standards: to be considered “positive,” the  
38  
39 195 comparisons between CO and *each* of the other 2 states needed to be in the direction  
40  
41 196 expected from the NAS report, each exhibiting statistical significance using a two-tailed  
42  
43 197 alpha of 0.05. A “positive” designation also required absence of a statistically significant  
44  
45 198 difference between NY versus OK using a two-tailed alpha of 0.05. All analyses were  
46  
47 199 performed using Stata 15 (StataCorp, College Station, TX).

50  
51 200

## 52 53 54 201 **Patient and Public Involvement**

202 The patients and public were not involved in the study.

203

## 204 RESULTS

### 205 Baseline Characteristics

206 The total number of admissions between 2010 and 2014 are shown for each state in  
207 **table 1**. Patients in CO were generally younger, more commonly female, and less  
208 ethnically diverse. Wealth in CO was less equally distributed, with a higher proportion of  
209 individuals with lower income in CO compared to NY. Finally, admission rates were  
210 lower in CO than the control states for most NAS diagnoses, with exceptions for pre-  
211 diabetes and post-traumatic stress disorder.

212

### 213 Study Validation

214 Over 2010-2014, the change in rates of cannabis abuse admissions after versus before  
215 recreational cannabis legalization in 2012 was greater in CO than in NY and OK (risk  
216 ratio [RR], 1.27; 95% confidence interval [CI], 1.26 to 1.28 and RR 1.16; 95% CI 1.15 to  
217 1.17; both  $P < 0.0005$ , respectively) (**figure 1A-B**). No significant changes comparing the  
218 two control states, NY and OK, were observed over the same time period (RR 0.93;  
219 95% CI 0.87 to 1.00;  $P = 0.05$ ).

220

### 221 Inpatient Healthcare Utilization after Cannabis Legalization

#### 222 *Number of admissions*

223 In unadjusted analyses, CO, NY, and OK had a similar number of total admissions  
224 before versus after recreational cannabis legalization (**figure 2A**). After adjusting for



1  
2  
3 225 covariates, there was a reduction of number of admissions following cannabis  
4  
5 226 legalization in CO when compared to OK (RR 0.97; 95% CI 0.96 to 0.98;  $P<0.0005$ ).  
6  
7 227 The point estimate was similar when comparing CO to NY, but did not reach statistical  
8  
9 228 significance (RR 0.99; 95% CI 0.98 to 1.01;  $P=0.47$ ). Results were similar in sensitivity  
10  
11 229 analysis using January 1, 2014 as change of policy date (CO versus OK: RR 0.96; 95%  
12  
13 230 CI 0.96 to 0.96;  $P<0.0005$ , and CO versus NY: RR 0.99; 95% CI 0.96 to 1.02;  $P=0.59$ ).  
14  
15  
16  
17  
18

### 19 232 *Length of stay*

20  
21 233 The median length of stay also remained similar after cannabis legalization across the 3  
22  
23 234 states in unadjusted analyses (**figure 2B**). After adjusting for covariates, length of  
24  
25 235 inpatient stay did not change significantly in CO following the law change when  
26  
27 236 compared with each of the 2 control states (1.75% annual reduction; 95% CI -12.25% to  
28  
29 237 10.01% in CO versus NY, and 3.46% annual reduction, 95% CI -16.48% to 37.90%  
30  
31 238 versus OK;  $P= 0.30$  and  $P=0.20$ , respectively). Length of stay did not change  
32  
33 239 significantly in CO compared with the control states when we used January 1, 2014 as  
34  
35 240 change of policy date.  
36  
37  
38  
39  
40  
41

### 42 242 *Healthcare Costs*

43  
44 243 In unadjusted analyses, the 3 states exhibited similar total costs across the study time  
45  
46 244 period (**figure 2C** and eTable 2). In multivariate analyses, healthcare costs remained  
47  
48 245 similar in state comparisons (2.99%; 95% CI -7.55% to 14.74%;  $P=0.18$  versus NY and  
49  
50 246 3.45%; 95% CI -7.31% to 15.46%;  $P=0.16$  versus OK) after cannabis legalization. No  
51  
52  
53 247 meaningful differences of healthcare costs were observed in the sensitivity analyses  
54  
55  
56  
57  
58  
59  
60

1  
2  
3 248 with January 1, 2014 as change of policy date or when we assumed the cost-to-charge  
4  
5 249 ratio for OK was equal to the average of the other states.  
6  
7

8 250

### 9 10 251 **Changes in Specific Diagnoses Highlighted by the National Academy of Sciences**

11  
12 252 Among the diagnoses with either substantial or moderate evidence of influence by  
13  
14 253 cannabis per the NAS, we distinguished between: 1) a group with no statistically  
15  
16 254 significant post-legalization differences between control states (NY versus OK  $P>0.05$ ),  
17  
18 255 suggesting that secular trends unlikely explained differences between CO and control  
19  
20 256 states (**figure 3**); and 2) a group with significant differences in diagnoses post-  
21  
22 257 legalization between control states (NY versus OK  $P<0.05$ ) (eFigure 1).  
23  
24  
25

26 258 In the NY versus OK  $P>0.05$  group (**figure 3**), changes in rates of diagnoses  
27  
28 259 after cannabis legalization reflected NAS-based evidence for most health outcomes.  
29  
30 260 Among the diagnoses most consistent with NAS-based evidence, there was an increase  
31  
32 261 in motor vehicle accidents, alcohol abuse, overdose injury and a decrease of chronic  
33  
34 262 pain after recreational cannabis legalization (each meeting statistical significance for  
35  
36 263 both comparisons with control states) . When using less stringent criteria ( $P<0.05$  for  
37  
38 264 both comparisons with NY and OK but where the relative risk for only one comparison  
39  
40 265 was in the same direction as NAS), admissions for abuse of other substances and  
41  
42 266 social anxiety disorder also increased with recreational cannabis legalization (**figure 3**).  
43  
44 267 Effects of cannabis liberalization on psychiatric outcomes (schizophrenia and bipolar  
45  
46 268 disorders) were either not consistent or weakly consistent with NAS (**figure 3**). When  
47  
48 269 differences between the two control states (NY and OK) were also significantly different  
49  
50 270 (suggesting effects potentially related to secular trends)(eFigure 1), changes in  
51  
52  
53  
54  
55  
56  
57  
58  
59  
60

1  
2  
3 271 diagnoses were mostly not concordant with NAS findings or one of the comparisons  
4  
5 272 between CO and either NY or OK did not exhibit statistical significance. Changes of the  
6  
7 273 risk over time with counterfactuals are shown for each NAS diagnosis in online  
8  
9  
10 274 supplementary eFigures 2-15.

11  
12 275 In the sensitivity analysis using January 1, 2014 as change of policy date (eTable  
13  
14 276 3), the main findings highlighted in the primary analysis using our stringent criteria  
15  
16 277 (increase of alcohol abuse, motor vehicle accidents, overdose injury and decrease of  
17  
18 278 chronic pain) again met the same criteria in favor of significant associations, except for  
19  
20 279 overdose injury and chronic pain (the latter meeting 2 of the 3 criteria described in the  
21  
22 280 Methods). In sensitivity analyses removing “in remission” diagnoses, no meaningful  
23  
24 281 changes were observed (relevant to alcohol abuse and abuse of other substances).  
25  
26  
27  
28  
29  
30

## 31 283 **DISCUSSION**

### 32 33 284 **Principal findings**

34  
35 285 Legalization of recreational cannabis was associated with more cannabis abuse, and  
36  
37 286 minimal effects on overall healthcare utilization. Changes in specific medical diagnoses  
38  
39 287 post-legalization reflected previously published substantial or moderate evidence on the  
40  
41 288 health effects of cannabis, including an increase in alcohol abuse, overdose injury and a  
42  
43 289 decrease of chronic pain.  
44  
45

46  
47 290 The increased frequency of cannabis abuse diagnoses in CO helps to validate  
48  
49 291 the concept that legalization would result in greater use.  
50

51 292 Effects of recreational cannabis legalization on healthcare utilization appeared to  
52  
53 293 be overall neutral. There was no evidence that either the length of stay or healthcare  
54  
55  
56  
57  
58  
59  
60

1  
2  
3 294 costs changed following liberalization of recreational cannabis. There was a reduction of  
4  
5 295 overall hospitalizations in CO when compared to OK but not compared to NY,  
6  
7 296 potentially because unaccounted state-level characteristics may have driven overall  
8  
9  
10 297 admissions differently.

11  
12 298       Following legalization of recreational cannabis, changes in rates of medical  
13  
14 299 diagnoses reflected NAS-based evidence for most health outcomes. The absence of  
15  
16 300 statistically significant differences in these outcomes between the two control states (NY  
17  
18 301 and OK) over the same time period provides some evidence that these observed  
19  
20 302 differences were less likely related to broader secular trends. After legalization of  
21  
22 303 recreational cannabis, there was an increase in motor vehicle accidents, alcohol abuse,  
23  
24 304 overdose injury and a decrease of chronic pain. In addition to information provided in  
25  
26 305 the NAS summary,<sup>3</sup> the association of cannabis with motor vehicle accidents has been  
27  
28 306 highlighted by recent literature.<sup>7, 8</sup> Consistent with our findings, a substantial  
29  
30  
31 307 bidirectional comorbidity between cannabis use and alcohol use has been previously  
32  
33 308 demonstrated, resulting in a moderate level of evidence designation for this relationship  
34  
35 309 per the NAS.<sup>9</sup> Also compatible with the NAS summary, we report that recreational  
36  
37 310 cannabis legalization was associated with an increasing number of admissions for  
38  
39 311 overdose injury. These included overdose of analgesics, barbiturates, sedative,  
40  
41 312 hypnotics and psychotropic drugs (eTable 2). This finding underlines the association of  
42  
43 313 cannabis use with other behaviors of drug addiction as highlighted by a recent cross-  
44  
45 314 sectional survey of over 30 thousand community-living US adults.<sup>10</sup> Finally, reduction of  
46  
47 315 chronic pain, especially neuropathic pain, in cannabis users is well known, although  
48  
49 316 prior literature has focused on medical rather than recreational cannabis.<sup>11, 12</sup>  
50  
51  
52  
53  
54  
55  
56  
57  
58  
59  
60

1  
2  
3 317 Except for social anxiety, the effects of recreational cannabis legalization on  
4  
5 318 psychiatric outcomes (schizophrenia, bipolar disorder, depression) were weakly or not  
6  
7 319 consistent with prior NAS-evidence. This finding may be related to residual confounding  
8  
9 320 by state-level characteristics, unaccounted secular trends, or insufficient longitudinal  
10  
11 321 follow-up.

12  
13  
14 322 We demonstrate that abuse of alcohol or other substances remains higher after  
15  
16 323 recreational cannabis legalization in a sensitivity analysis without “in remission”  
17  
18 324 diagnoses. Overall, these findings suggest that when the substance use disorder is in  
19  
20 325 remission, it does not play a significant role in overall results.

21  
22  
23 326 In our primary analysis, we used December 10, 2012 as the date of recreational  
24  
25 327 cannabis legalization. Following this date, private possession and growth of cannabis  
26  
27 328 became legal in Colorado. After January 1, 2014, recreational cannabis could be legally  
28  
29 329 purchased in retail stores.<sup>5</sup> To take the additional effect of retail sales of recreational  
30  
31 330 cannabis into account, we performed sensitivity analyses using January 2014 as the  
32  
33 331 “change of policy” date. We did not observe any meaningful difference in the majority of  
34  
35 332 the outcomes studied, suggesting that the effect of recreational cannabis on healthcare  
36  
37 333 utilization was independent of availability in stores.

38  
39  
40  
41  
42 334

### 43 44 335 **Strengths and Weaknesses**

45  
46 336 Although several studies have investigated the health effects of cannabis,<sup>13</sup> they have  
47  
48 337 relied on small sample sizes or have generated conflicting data.<sup>14-16</sup> In contrast, our  
49  
50 338 findings are derived from HCUP state-wide data comprising over 28 million individuals  
51  
52 339 and over 16 million hospitalizations across CO, site of the 2012 *Amendment 64*, and 2

1  
2  
3 340 controls states without cannabis legalization over the same time period. As NY and OK  
4  
5 341 are very different geographically and demographically, we believe their inclusion as  
6  
7 342 control states represents a strength of our manuscript. Specifically, their selection  
8  
9 343 allowed us to demonstrate that the effects of recreational cannabis legalization on  
10  
11 344 health care utilization were likely independent of living in an urban or rural setting.  
12  
13

14 345 Several limitations should be acknowledged. The HCUP database relies on  
15  
16 346 physician coding; however, such coding for several medical diagnoses listed in **table 1**  
17  
18 347 have been shown to be highly specific with variable sensitivity<sup>17-20</sup> and HCUP has  
19  
20 348 proven to be a powerful tool in large population studies.<sup>20-24</sup> Some potentially important  
21  
22 349 mediators are not captured by ICD-9 codes, such as quantity of cannabis used or  
23  
24 350 formulation (oral versus other), although these may be more relevant to identifying  
25  
26 351 mechanisms and their absence would likely not lead to false positive results. Patients  
27  
28 352 may be more likely to disclose cannabis use following legalization of recreational  
29  
30 353 cannabis and clinicians may be more inclined to test for it. Hence, we cannot completely  
31  
32 354 exclude detection bias in the validation analysis showing an increase in cannabis abuse  
33  
34 355 diagnoses following legalization of recreational cannabis. Moreover, we cannot exclude  
35  
36 356 that the increased frequency of cannabis abuse hospitalizations is simply related to  
37  
38 357 severity of cannabis abuse rather than to a greater prevalence of cannabis use.  
39  
40  
41  
42  
43

44 358 As with any observational study, we cannot exclude residual confounding as an  
45  
46 359 explanation of our findings. However, we adjusted for conventionally recognized  
47  
48 360 confounders as appropriate and as available, and, as this was largely a study of the  
49  
50 361 same populations pre- and post-legalization, many of the limitations inherent to  
51  
52 362 conventional individual-level analyses are likely less relevant.  
53  
54  
55  
56  
57  
58  
59  
60

1  
2  
3 363 We did not select all US states as controls. Most states do not have HCUP data  
4  
5 364 up until the end of 2014, each requires a separate HCUP application, and each carries  
6  
7 365 significant costs. We acknowledge this represents a limitation as we could not fully  
8  
9 366 account for secular trends that might influence results. However, we have adjusted all  
10  
11 367 analyses for urbanicity and other state-level differences in order to minimize the impact  
12  
13 368 of secular trends. We also acknowledge that CO had legalized medical cannabis prior to  
14  
15 369 legalization of recreational cannabis on December 10, 2012. However, control states  
16  
17 370 NY and OK had not. We could have selected control states that had already  
18  
19 371 medicalized cannabis instead of NY and OK, but we acknowledge that complex  
20  
21 372 differences exist among medical legalization regimens among states.<sup>25</sup> Hence, we  
22  
23 373 believe selection of control states with diverse medical legalization regimens would  
24  
25 374 have primarily reduced our power to detect a real difference rather than contribute to  
26  
27 375 any false positive spurious results. In our study, we demonstrate that legalization of  
28  
29 376 recreational cannabis is associated with more cannabis abuse or cannabis use disorder.  
30  
31 377 Prior large, multi-state, population-based analyses have shown that legalization of  
32  
33 378 medical cannabis is associated with increased cannabis use, but not increased  
34  
35 379 cannabis use disorder.<sup>26</sup> One could speculate that medical cannabis consumption is  
36  
37 380 more controlled and rationed when compared to recreational cannabis, the latter  
38  
39 381 available in both retail stores and private homes and therefore perhaps more easily  
40  
41 382 abused. Further studies are needed to quantify the amount of cannabis consumption (in  
42  
43 383 grams) in states where only medical cannabis is legal versus states where both medical  
44  
45 384 and recreational cannabis are allowed.  
46  
47  
48  
49  
50  
51  
52  
53  
54  
55  
56  
57  
58  
59  
60

1  
2  
3 385 The HCUP database does not capture information regarding outpatient activity  
4  
5 386 and therefore these findings are restricted to hospital-based medicine.  
6

7  
8 387 Our use of stringent criteria in assessing changes related to NAS diagnoses may  
9  
10 388 have been too conservative, leading to a sacrifice of false negatives in order to avoid  
11  
12 389 false positives.  
13

14  
15 390 Finally, our study was limited to two-year follow-up after recreational cannabis  
16  
17 391 legalization, and we therefore cannot comment on long-term effects that may result.  
18

19 392  
20

## 21 393 **Conclusions**

22  
23  
24 394 In conclusion, recreational cannabis legalization is associated with an expected  
25  
26 395 increase in cannabis abuse. Overall effects on inpatient healthcare utilization appear to  
27  
28 396 be neutral, with subtle changes in various components of that utilization likely occurring  
29  
30 397 due to changes in the types of admissions observed. Measurable effects of recreational  
31  
32 398 cannabis legalization on increasing motor vehicle accidents, alcohol abuse, overdose  
33  
34 399 injury and reducing chronic pain are consistent with previously established evidence.  
35  
36

37  
38 400 These data provide the first description of population-level effects that may help guide  
39  
40 401 future decisions regarding cannabis policy, individuals considering using cannabis, and  
41  
42 402 physicians caring for those who may choose to consume it.  
43  
44  
45  
46  
47  
48  
49  
50  
51  
52  
53  
54  
55  
56  
57  
58  
59  
60



1  
2  
3 403 **Contributors** FND and GMM had full access to all of the data in the study and take  
4  
5 404 responsibility for the integrity of the data and the accuracy of the data analysis. FND  
6  
7 405 and GMM were responsible for the study concept and design. All authors (FND, EV,  
8  
9 406 TAD, MJP, JEO, GN, KA, CDF, ESL, SMF, DSK, and GMM) contributed to data  
10  
11 407 acquisition, analysis, and interpretation. EV, GN, and GMM completed the statistical  
12  
13 408 analysis. FND and GMM drafted the manuscript and were responsible for the critical  
14  
15 409 revision of the manuscript for important intellectual content. GMM obtained funding for  
16  
17 410 the study. All authors contributed to the administrative, technical, and material support  
18  
19 411 for the study and approved the final version of the manuscript.  
20  
21  
22

23  
24 412 **Funding** This work was supported by the Agency for Healthcare Research and Quality  
25  
26 413 (AHRQ) and Health Care Information (HCI) Division of the Oklahoma State Department  
27  
28 414 of Health. The funding source had no role in the design, conduct, or analysis of the  
29  
30 415 study; data analysis or interpretation; preparation of the manuscript; or the decision to  
31  
32 416 submit the manuscript for publication.  
33  
34

35 417 **Competing interests** None declared.  
36  
37

38 418 **Patient consent** Not required.  
39

40 419 **Ethics approval** Ethical approval to use de-identified HCUP data was obtained from  
41  
42 420 the University of California, San Francisco Committee on Human Research.  
43  
44

45 421 **Data sharing** Data consist of deidentified participant data (i.e. ICD-9 admission  
46  
47 422 diagnoses) available from the Healthcare Cost and Utilization Project (HCUP) for a fee.  
48  
49 423 Information about how to obtain the data and for what time period can be found at:  
50  
51 424 <https://www.hcup-us.ahrq.gov/>  
52  
53

54 425 **Open access** This is an open access article distributed in accordance with the  
55  
56  
57  
58  
59  
60

1  
2  
3 426 Creative Commons Attribution Non Commercial (CC BY-NC 4.0) license, which  
4  
5 427 permits others to distribute, remix, adapt, build upon this work non-commercially,  
6  
7 428 and license their derivative works on different terms, provided the original work is  
8  
9  
10 429 properly cited, appropriate credit is given, any changes made indicated, and the use  
11  
12 430 is non-commercial. See: <http://creativecommons.org/licenses/by-nc/4.0/>.  
13  
14  
15  
16  
17  
18  
19  
20  
21  
22  
23  
24  
25  
26  
27  
28  
29  
30  
31  
32  
33  
34  
35  
36  
37  
38  
39  
40  
41  
42  
43  
44  
45  
46  
47  
48  
49  
50  
51  
52  
53  
54  
55  
56  
57  
58  
59  
60

For peer review only

1  
2  
3 431 **References**  
4

- 5  
6 432 1. Substance Abuse and Mental Health Services Administration. *Behavioral health*  
7  
8 433 *trends in the United States: Results from the 2014 National Survey on Drug Use and*  
9  
10 434 *Health*. Rockville, MD: U.S. Dept. of Health and Human Services; 2016. HHS  
11  
12 435 Publication No. SMA 15-4927, NSDUH Series H-50.  
13  
14  
15 436 2. State Medical Marijuana Laws 2016. National Conference of State Legislatures.  
16  
17 437 <http://www.ncsl.org/research/health/state-medical-marijuana-laws.aspx>. Updated June  
18  
19 438 27, 2018. Accessed December 1, 2017.  
20  
21  
22 439 3. Committee on the Health Effects of Marijuana, Board on Population Health and  
23  
24 440 Public Health Practice, Health and Medicine Division, National Academies of Sciences,  
25  
26 441 Engineering, and Medicine. *The Health Effects of Cannabis and Cannabinoids : The*  
27  
28 442 *Current State of Evidence and Recommendations for Research*. Washington, DC: The  
29  
30 443 National Academies Press; 2017.  
31  
32  
33 444 4. *Colorado Marijuana Legalization Initiative, Amendment 64 2012 (Colo.)*  
34  
35 445 5. Wark, J. Up Early and in Line for a Marijuana Milestone in Colorado. The New  
36  
37 446 York Times [Internet]. 2014 Jan 1 [cited 2019 Feb 14];U.S.: [about 2 p.]. Available from:  
38  
39 447 [https://www.nytimes.com/2014/01/02/us/colorado-stores-throw-open-their-doors-to-pot-](https://www.nytimes.com/2014/01/02/us/colorado-stores-throw-open-their-doors-to-pot-buyers.html)  
40  
41 448 [buyers.html](https://www.nytimes.com/2014/01/02/us/colorado-stores-throw-open-their-doors-to-pot-buyers.html)  
42  
43  
44 449 6. Institute for Health & Socioeconomic Policy. *Average Charge-to-cost Ratio by*  
45  
46 450 *State*. Silver Spring, MD: National Nurses United; 2012.  
47  
48  
49 451 7. Rogeberg O. A meta-analysis of the crash risk of cannabis-positive drivers in  
50  
51 452 culpability studies--Avoiding interpretational bias. *Accid Anal Prev*. 2019;123:69-78.  
52  
53  
54  
55  
56  
57  
58  
59  
60

- 1  
2  
3 453 8. Hostiuc S, Moldoveanu A, Negoii I, Drima E. The association of unfavorable  
4  
5 454 traffic events and cannabis usage: a meta-analysis. *Front Pharmacol*. 2018;9:99.  
6  
7  
8 455 9. Blanco C, Hasin DS, Wall MM, et al. Cannabis Use and Risk of Psychiatric  
9  
10 456 Disorders: Prospective Evidence From a US National Longitudinal Study. *JAMA*  
11  
12 457 *Psychiatry*. 2016;73(4):388-95.  
13  
14  
15 458 10. Hayley AC, Stough C, Downey LA. DSM-5 cannabis use disorder, substance  
16  
17 459 use and DSM-5 specific substance-use disorders: Evaluating comorbidity in a  
18  
19 460 population-based sample. *Eur Neuropsychopharmacol*. 2017;27(8):732-743.  
20  
21  
22 461 11. Whiting PF, Wolff RF, Deshpande S, et al. Cannabinoids for medical use: A  
23  
24 462 systematic review and meta-analysis. *JAMA*. 2015;313(24):2456-73.  
25  
26 463 12. Hill KP. Medical marijuana for treatment of chronic pain and other medical and  
27  
28 464 psychiatric problems: A clinical review. *JAMA*. 2015;313(24):2474-83.  
29  
30  
31 465 13. Karila L, Roux P, Rolland B, et al. Acute and long-term effects of cannabis use: a  
32  
33 466 review. *Curr Pharm Des*. 2014;20(25):4112-8.  
34  
35  
36 467 14. Schreiner AM, Dunn ME. Residual effects of cannabis use on neurocognitive  
37  
38 468 performance after prolonged abstinence: a meta-analysis. *Exp Clin Psychopharmacol*.  
39  
40 469 2012;20(5):420-9.  
41  
42  
43 470 15. Volkow ND. Effects of Cannabis Use on Human Behavior-Reply. *JAMA*  
44  
45 471 *Psychiatry*. 2016;73(9):996.  
46  
47 472 16. Lynskey MT, Glowinski AL, Todorov AA, et al. Major depressive disorder, suicidal  
48  
49 473 ideation, and suicide attempt in twins discordant for cannabis dependence and early-  
50  
51 474 onset cannabis use. *Arch Gen Psychiatry*. 2004;61(10):1026-32.  
52  
53  
54  
55  
56  
57  
58  
59  
60

- 1  
2  
3 475 17. Kim HM, Smith EG, Stano CM, et al. Validation of key behaviourally based  
4  
5 476 mental health diagnoses in administrative data: suicide attempt, alcohol abuse, illicit  
6  
7 477 drug abuse and tobacco use. *BMC Health Serv Res*. 2012;12:18.  
8  
9  
10 478 18. McCormick N, Lacaille D, Bhole V, Avina-Zubieta JA. Validity of myocardial  
11  
12 479 infarction diagnoses in administrative databases: a systematic review. *PLoS One*.  
13  
14 480 2014;9(3):e92286.  
15  
16  
17 481 19. Dewland TA, Glidden DV, Marcus GM. Healthcare Utilization and Clinical  
18  
19 482 Outcomes after Catheter Ablation of Atrial Flutter. *PLoS ONE*. 2014;9(7):e100509.  
20  
21 483 20. Dukes JW, Dewland TA, Vittinghoff E, et al. Access to alcohol and heart disease  
22  
23 484 among patients in hospital: observational cohort study using differences in alcohol sales  
24  
25 485 laws. *BMJ*. 2016;353:i2714.  
26  
27  
28 486 21. Dewland TA, Olgin JE, Vittinghoff E, Marcus GM. Incident atrial fibrillation among  
29  
30 487 Asians, Hispanics, blacks, and whites. *Circulation*. 2013;128(23):2470-7.  
31  
32  
33 488 22. Birkmeyer JD, Siewers AE, Finlayson EV, et al. Hospital volume and surgical  
34  
35 489 mortality in the United States. *N Engl J Med*. 2002;346(15):1128-37.  
36  
37  
38 490 23. Gialdini G, Nearing K, Bhave PD, et al. Perioperative atrial fibrillation and the  
39  
40 491 long-term risk of ischemic stroke. *JAMA*. 2014;312(6):616-22.  
41  
42  
43 492 24. Whitman IR, Agarwal V, Nah G, et al. Alcohol Abuse and Cardiac Disease. *J Am*  
44  
45 493 *Coll Cardiol*. 2017;69(1):13-24.  
46  
47 494 25. Williams AR, Olsson M, Kim JH, Martins SS, Kleber HD. Older, less regulated  
48  
49 495 medical marijuana programs have much greater enrollment rates than newer  
50  
51 496 'medicalized' programs. *Health Aff (Millwood)*. 2016;35(3):480-8.  
52  
53  
54  
55  
56  
57  
58  
59  
60

1  
2  
3 497 26. Williams AR, Santaella-Tenorio J, Mauro CM, Levin FR, Martins SS. Loose  
4  
5 498 regulation of medical marijuana programs associated with higher rates of adult  
6  
7 499 marijuana use but not cannabis use disorder. *Addiction*. 2017;112(11):1985-1991.  
8  
9  
10  
11  
12  
13  
14  
15  
16  
17  
18  
19  
20  
21  
22  
23  
24  
25  
26  
27  
28  
29  
30  
31  
32  
33  
34  
35  
36  
37  
38  
39  
40  
41  
42  
43  
44  
45  
46  
47  
48  
49  
50  
51  
52  
53  
54  
55  
56  
57  
58  
59  
60

For peer review only

## 500 **FIGURE LEGENDS**

501 **Figure 1.** Multivariate adjusted rates of admissions for cannabis abuse over 2010-2014  
502 in Colorado, site of implementation of the 2012 recreational cannabis legalization policy,  
503 compared with New York (A) and Oklahoma (B), control states without cannabis  
504 legalization. Red lines show the predicted rates of admissions for cannabis abuse had  
505 the cannabis legalization policy not been instituted. The comparison between Colorado  
506 and the control states with regards to change of risk ratio (RR) slope within the 2010-  
507 2012 period (pre-legalization) and 2012-2014 period (post-legalization), as well of the  
508 overall RR slope change, are also represented for the Colorado versus New York (A)  
509 and Colorado versus Oklahoma (B) comparisons. Red lines show the predicted rates of  
510 admissions for cannabis abuse had the cannabis legalization policy not been instituted.  
511 Each model was adjusted for age, gender, and race and state-level characteristics (see  
512 Methods section for further details). CI = confidence interval; vs = versus.

513  
514 **Figure 2.** Healthcare utilization over 2010-2014 in Colorado, site of implementation of  
515 the 2012 recreational cannabis legalization policy, and in New York and Oklahoma,  
516 control states without cannabis legalization. The total number of admissions/1000  
517 population per year, the median length of stay per year, and the median costs per  
518 individual per year are shown in panels A, B, and C, respectively for the 3 states. Error  
519 bars denote interquartile ranges. LOS = length of stay.

520  
521 **Figure 3.** Health outcomes with substantial or moderate evidence of a statistical  
522 association with cannabis use based on the National Academy of Science (NAS)

1  
2  
3 523 summary statement. Medical diagnoses are identified based on a non-significant  
4  
5 524 ( $P>0.05$ ) comparison between New York (NY) and Oklahoma (OK) (control states  
6  
7  
8 525 without cannabis legalization) with regards to the change of admission rates for such  
9  
10 526 diagnoses following cannabis legalization.  $P$  values for the comparison between  
11  
12 527 Colorado (CO) (site of cannabis legalization) and NY (rhomboid symbol), or between  
13  
14 528 CO and OK (circular symbol) are shown as either  $<0.05$ , or  $> 0.05$  using a gray scale for  
15  
16  
17 529 evidence of cannabis benefit (risk ratio [RR]  $< 1$  shown on the left) and cannabis harm  
18  
19 530 (RR $>1$  shown on the right); 95% confidence intervals are shown for the comparison  
20  
21  
22 531 between CO and NY and between CO and OK as solid and dotted lines, respectively.  
23  
24 532 Progressively darker shades of green or red indicate greater weight of evidence in the  
25  
26 533 direction of proposed benefit versus harm, respectively, by the NAS.  
27  
28  
29  
30  
31  
32  
33  
34  
35  
36  
37  
38  
39  
40  
41  
42  
43  
44  
45  
46  
47  
48  
49  
50  
51  
52  
53  
54  
55  
56  
57  
58  
59  
60



**Table 1.** Clinical characteristics of the 3 study states over the 2010-2014 period.

|                                                                             | Colorado       | New York       | Oklahoma       | <i>P</i> value |
|-----------------------------------------------------------------------------|----------------|----------------|----------------|----------------|
| Total population                                                            | 5,197,237      | 19,594,599     | 3,819,383      |                |
| Total admissions                                                            | 2,088,909      | 11,726,283     | 2,334,988      |                |
| Total admissions/1,000 population                                           | 402±0.27       | 598±0.17       | 611±0.40       | 0.0001         |
| <b>Demographics</b>                                                         |                |                |                |                |
| Age – yr                                                                    | 45 ± 28        | 49 ± 28        | 48 ± 28        | 0.0001         |
| Male – no. (%)                                                              | 870,573 (42)   | 5,087,181 (41) | 954,848 (43)   | 0.0001         |
| Race – no. (%)                                                              |                |                |                | 0.0001         |
| White                                                                       | 1,548,099 (74) | 6,406,582 (55) | 1,879,727 (81) |                |
| Black                                                                       | 102,444 (5)    | 2,083,366 (18) | 202,420 (9)    |                |
| Native American                                                             | 13,143 (1)     | 36,216 (0.3)   | 131,714 (6)    |                |
| Other                                                                       | 425,223 (20)   | 3,200,119 (27) | 121,127 (5)    |                |
| <b>Lifestyle</b>                                                            |                |                |                |                |
| Median Household Income, dollars (quartiles for patient ZIP code) – no. (%) |                |                |                | 0.0001         |
| Quartile 1                                                                  | 617,537 (30)   | 3,087,192 (28) | No data        |                |
| Quartile 2                                                                  | 558,760 (27)   | 2,623,087 (24) |                |                |
| Quartile 3                                                                  | 470,051 (23)   | 2,673,153 (24) |                |                |
| Tobacco use – no. (%)                                                       | 251,566 (12)   | 1,717,940 (10) | 235,685 (14)   | 0.0001         |
| Alcohol abuse – no. (%)                                                     | 112,715 (5)    | 652,608 (6)    | 71,931 (3)     | 0.0001         |
| <b>NAS Diagnoses</b>                                                        |                |                |                |                |
| Non-seminoma type testicular germ cell cancer – no. (%)                     | 405 (0.02)     | 2,487 (0.02)   | 480 (0.02)     | 0.0001         |
| Acute myocardial infarction – no. (%)                                       | 39,513 (1.9)   | 271,285 (2.3)  | 60,413 (2.6)   | 0.0001         |
| Brain hemorrhage – no. (%)                                                  | 10,963 (0.5)   | 58,278 (0.5)   | 10,245 (0.4)   | 0.0001         |
| Ischemic stroke – no. (%)                                                   | 27,986 (1.3)   | 194,478 (1.7)  | 45,602 (2)     | 0.0001         |

|                                                                    |               |                |               |        |
|--------------------------------------------------------------------|---------------|----------------|---------------|--------|
|                                                                    |               |                |               |        |
| Metabolic syndrome & diabetes – no. (%)                            | 294,821 (14)  | 2,301,835 (20) | 465,353 (20)  | 0.0001 |
| Prediabetes – no. (%)                                              | 42,544 (2)    | 73,407 (0.6)   | 24,246 (1)    | 0.0001 |
| Bronchitis – no. (%)                                               | 65,265 (3)    | 429,230 (4)    | 131,343 (6)   | 0.0001 |
| Motor vehicle accidents – no. (%)                                  | 14,941 (0.7)  | 59,686 (0.5)   | 13,692 (0.6)  | 0.0001 |
| Overdose injury – no. (%)                                          | 10,933 (0.5)  | 40,226 (0.3)   | 12,147 (0.5)  | 0.0001 |
| Substance use disorder – no. (%)                                   | 158,244 (7.6) | 974,856 (8.3)  | 109,305 (4.7) | 0.0001 |
| Anxiety disorders – no. (%)                                        | 131,426 (6.4) | 595,478 (5.2)  | 139,627 (6.1) | 0.0001 |
| Anxiety disorders (except social anxiety) – no. (%)                | 51,913 (2.5)  | 283,280 (2.4)  | 65,279 (2.8)  | 0.0016 |
| Bipolar disorders – no. (%)                                        | 52,348 (2.5)  | 287,735 (2.5)  | 61,411 (2.6)  | 0.0001 |
| Depressive disorders – no. (%)                                     | 213,851 (10)  | 827,932 (7)    | 190,083 (8)   | 0.0001 |
| Schizophrenia or other psychoses – no. (%)                         | 53,652 (2.6)  | 352,533 (3)    | 68,385 (2.9)  | 0.0001 |
| Positive symptoms of schizophrenia (i.e. hallucinations) – no. (%) | 2,653 (0.1)   | 9,482 (0.1)    | 3,531 (0.2)   | 0.0001 |
| Post-traumatic stress disorder – no. (%)                           | 28,582 (1.4)  | 75,608 (0.6)   | 17,101 (0.7)  | 0.0001 |
| Social anxiety disorder – no. (%)                                  | 295 (0.01)    | 1,090 (0.01)   | 135 (0.01)    | 0.0295 |
| Suicide – no. (%)                                                  | 4,957 (0.2)   | 15,646 (0.1)   | 4,407 (0.2)   | 0.0001 |
| Low offspring birthweight – no. (%)                                | 2,842 (0.1)   | 7,462 (0.1)    | 1,742 (0.1)   | 0.0002 |
| Maternal pregnancy complications – no. (%)                         | 39,343 (1.9)  | 144,353 (1.2)  | 40,938 (1.8)  | 0.0001 |
| Unemployment/low income – no. (%)                                  | 3,134 (0.2)   | 76,789 (0.7)   | 730 (0.03)    | 0.0001 |
| Nausea or vomiting – no. (%)                                       | 63,806 (3)    | 162,11(1.4)    | 58,706 (2.5)  | 0.0001 |
| Chronic pain – no. (%)                                             | 140,209 (6)   | 234,160 (2)    | 123,563 (5)   | 0.0001 |
| Spasticity – no. (%)                                               | 5,759 (0.3)   | 12,517 (0.1)   | 5,371 (0.2)   | 0.0001 |

|                                            |              |              |            |        |
|--------------------------------------------|--------------|--------------|------------|--------|
| Short-term sleep – no. (%)                 | 652 (0.03)   | 3,364 (0.03) | 357 (0.02) | 0.0001 |
| Tourette syndrome – no. (%)                | 428 (0.02)   | 2,784 (0.02) | 336 (0.01) | 0.0001 |
| Increased appetite & weight gain – no. (%) | 1,022 (0.05) | 3,017 (0.03) | 651 (0.03) | 0.0001 |

534 NAS = National Academy of Science. Admission diagnoses listed were based on those  
 535 found influenced by cannabis in the 2017 NAS review.<sup>3</sup> Substance use disorder includes  
 536 dependence or abuse of alcohol, tobacco, or other illicit drug. All variables pertain to the  
 537 2010-2014 period. Plus-minus values are means  $\pm$  SD. No. (%) indicates number of  
 538 admissions with a specific demographic/lifestyle characteristic or NAS diagnosis (% of  
 539 total admissions). A *P* value less than 0.05 is considered statistically significant.

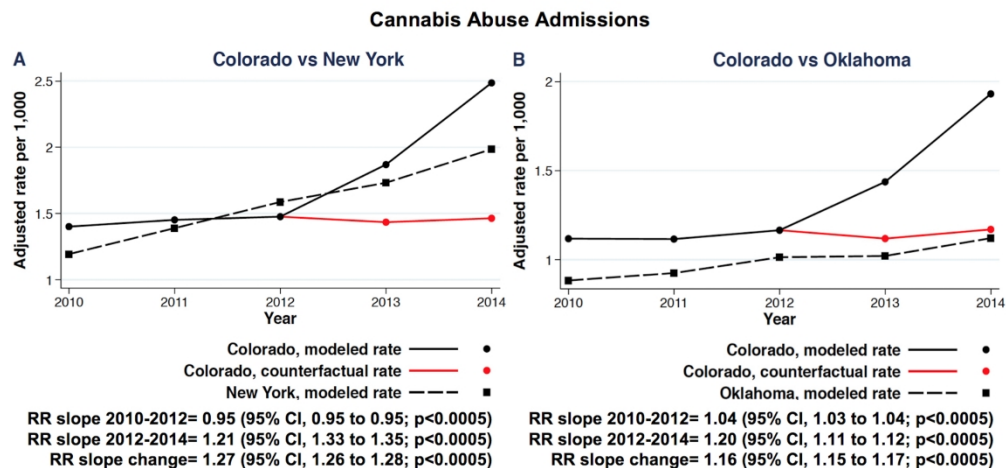

Multivariate adjusted rates of admissions for cannabis abuse over 2010-2014 in Colorado, site of implementation of the 2012 recreational cannabis legalization policy, compared with New York (A) and Oklahoma (B), control states without cannabis legalization. Red lines show the predicted rates of admissions for cannabis abuse had the cannabis legalization policy not been instituted. The comparison between Colorado and the control states with regards to change of risk ratio (RR) slope within the 2010-2012 period (pre-legalization) and 2012-2014 period (post-legalization), as well as the overall RR slope change, are also represented for the Colorado versus New York (A) and Colorado versus Oklahoma (B) comparisons. Red lines show the predicted rates of admissions for cannabis abuse had the cannabis legalization policy not been instituted. Each model was adjusted for age, gender, and race and state-level characteristics (see Methods section for further details). CI = confidence interval; vs = versus.

663x316mm (300 x 300 DPI)

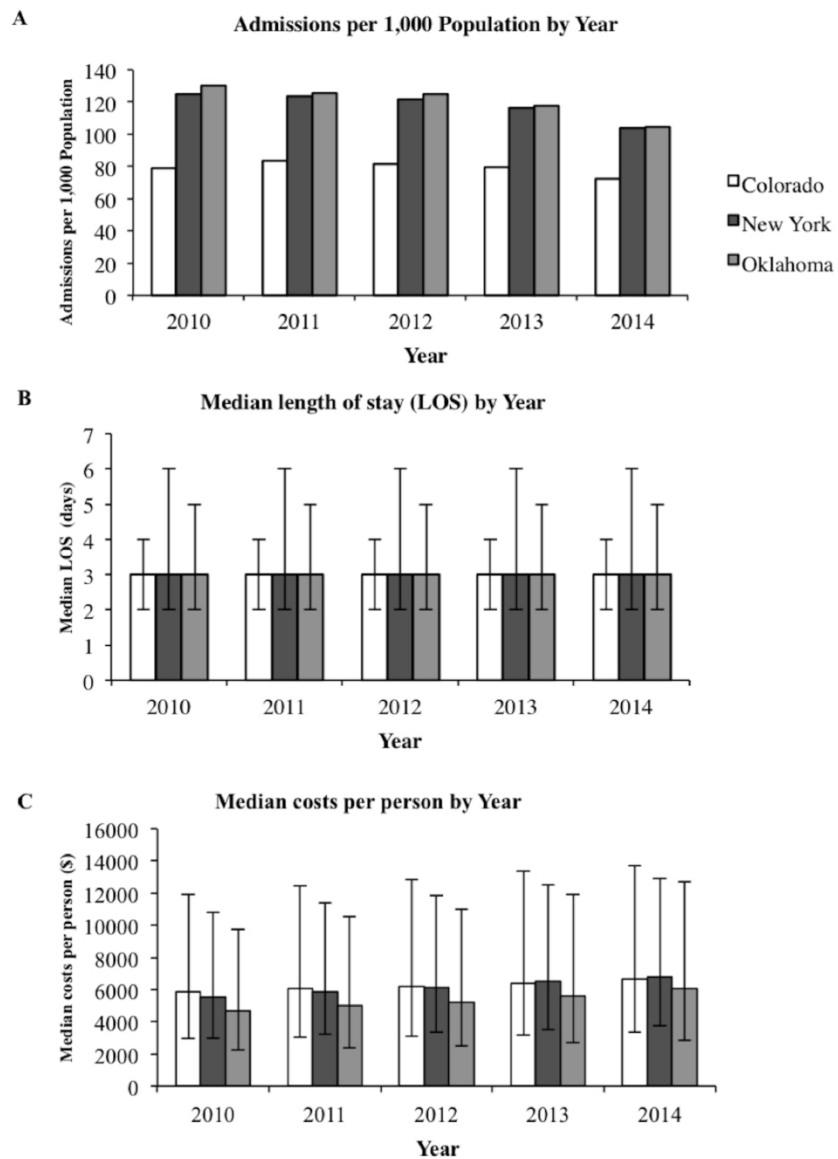

Healthcare utilization over 2010-2014 in Colorado, site of implementation of the 2012 recreational cannabis legalization policy, and in New York and Oklahoma, control states without cannabis legalization. The total number of admissions/1000 population per year, the median length of stay per year, and the median costs per individual per year are shown in panels A, B, and C, respectively for the 3 states. Error bars denote interquartile ranges. LOS = length of stay.

160x221mm (300 x 300 DPI)

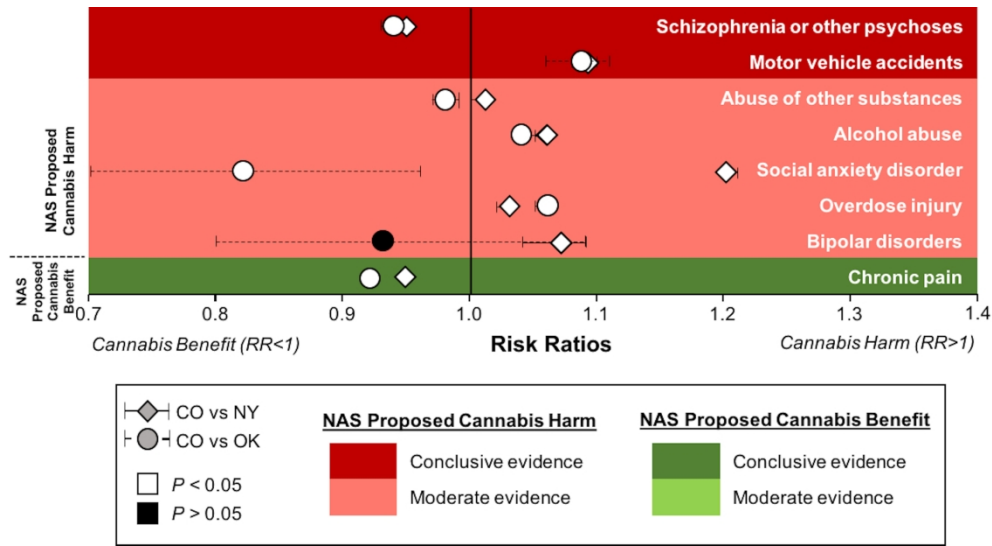

Health outcomes with substantial or moderate evidence of a statistical association with cannabis use based on the National Academy of Science (NAS) summary statement. Medical diagnoses are identified based on a non-significant ( $P > 0.05$ ) comparison between New York (NY) and Oklahoma (OK) (control states without cannabis legalization) with regards to the change of admission rates for such diagnoses following cannabis legalization. P values for the comparison between Colorado (CO) (site of cannabis legalization) and NY (rhomboid symbol), or between CO and OK (circular symbol) are shown as either  $< 0.05$ , or  $> 0.05$  using a gray scale for evidence of cannabis benefit (risk ratio [RR]  $< 1$  shown on the left) and cannabis harm (RR  $> 1$  shown on the right); 95% confidence intervals are shown for the comparison between CO and NY and between CO and OK as solid and dotted lines, respectively. Progressively darker shades of green or red indicate greater weight of evidence in the direction of proposed benefit versus harm, respectively, by the NAS.

188x101mm (300 x 300 DPI)

## Supplementary Appendix

### Changes in Inpatient Healthcare Utilization after Legalization of Recreational Cannabis

Francesca N. Delling, MD, MPH;<sup>1</sup> Eric Vittinghoff, PhD;<sup>1</sup> Thomas A. Dewland, MD;<sup>2</sup> Mark J. Pletcher, MD, MPH;<sup>1</sup> Jeffrey E. Olgin, MD;<sup>1</sup> Gregory Nah, MA;<sup>1</sup> Kirstin Aschbacher, PhD;<sup>1</sup> Christina Fang, BA;<sup>1</sup> Emily S. Lee, BA;<sup>1</sup> Shannon M. Fan, BA;<sup>1</sup> Dhruv S. Kazi, MD, MS;<sup>1</sup> and Gregory M. Marcus, MD, MAS.<sup>1</sup>

<sup>1</sup>Department of Medicine, Division of Cardiology, University of California, San Francisco, San Francisco, CA, USA

<sup>2</sup>Knight Cardiovascular Institute, Oregon Health & Science University, Portland, OR, USA

#### Table of Contents

**eMethods.** Cost Analysis

**eTable 1.** Yearly costs and charges for the 3 study states

**eTable 2.** International Classification of Diseases-9<sup>th</sup> Edition (ICD-9) codes defining each medical diagnosis

**eFigure 1.** Health outcomes with substantial or moderate evidence of a statistical association with cannabis use based on the National Academy of Science (NAS) summary statement

**eFigure 2-15.** Plots depicting admission rates for diagnoses classified based on weight of evidence from the National Academy of Science

**eTable 3.** Changes in specific NAS outcomes in a sensitivity analysis using January 2014 as the date of recreational cannabis legalization

This supplementary material has been provided by the authors to give readers additional information about their work.

## eMethods. Cost Analysis

### Cost Estimations

The inpatient cost for each hospitalization in New York and Colorado was estimated by multiplying the total charges (TOTCHG) obtained from HCUP State Inpatient Database with the institution-specific all-payer cost-to-charge ratio (APICC) obtained from the Cost-to-Charge Ratio file. Hospital ID was used as a linkage to merge both files. Total inpatient costs were calculated as the sum of the cost for all hospitalizations in a given state for a particular year. The databases contained 186,226 (8.7%) encounters with non-matched/missing hospital ID for NY and 1,132,696 (9.6%) encounters with non-matched/missing hospital ID for Colorado; for these encounters. In order to estimate the cost of these hospitalizations (for which we had charges but no cost-to-charge ratio) we applied the average cost-to-charge ratio for that state-year. This was estimated by dividing the sum of costs for all hospitalizations for which cost-to-charge ratios were available by the sum of charges for all hospitalizations for which cost-to-charge ratios were available in a given state-year (eTable 2).

### Oklahoma Total Cost Estimate

HCUP does not produce SID and CCR file for Oklahoma. We obtained these data from Oklahoma State Department of Health – this dataset contains information about total charges but not cost-to-charge ratios. We estimated total inpatient costs in Oklahoma in two ways. First, we used a state-wide constant cost-to-charge ratio (0.3119) to estimate the total cost (ratio derived from the Institute for Health and Socio-Economic Policy calculations of federal cost reports). We then conducted a sensitivity analysis in which we used the average of the cost-to-charge ratios of New York and Colorado for any given state-year (eTable 2).



**eTable 1.** Yearly costs and charges for the 3 study states

| <b>Colorado</b>                                                   | <b>2010</b>      | <b>2011</b>      | <b>2012</b>      | <b>2013</b>      | <b>2014</b>      | <b>2010 to 2014</b> |
|-------------------------------------------------------------------|------------------|------------------|------------------|------------------|------------------|---------------------|
| Total hospitalizations, n                                         | 397,505          | 428,912          | 424,640          | 418,952          | 418,900          | 2,088,909           |
| Hospitalizations for which CCR is available, n (%)                | 396,433 (99.7%)  | 301,586 (70.3%)  | 382,021 (90.0%)  | 412,483 (98.5%)  | 413,160 (98.6%)  | 1,905,683 (91.2%)   |
| Total charges for hospitalizations for which CCR is available     | \$14,382,791,648 | \$11,170,040,412 | \$15,821,232,608 | \$19,349,895,615 | \$20,370,018,114 | \$81,093,978,397    |
| Total costs for hospitalizations for which CCR is available       | \$4,104,443,164  | \$3,033,915,324  | \$3,963,892,093  | \$4,619,884,886  | \$4,700,380,255  | \$20,422,515,722    |
| Average CCR*                                                      | 0.2854           | 0.2716           | 0.2505           | 0.2388           | 0.2309           |                     |
| Hospitalizations for which CCR is not available, n (%)            | 1,072 (0.3%)     | 127,326 (29.7%)  | 42,619 (10.0%)   | 6,469 (1.5%)     | 5,740 (1.4%)     | 183,226 (8.8%)      |
| Total charges for hospitalizations for which CCR is not available | \$55,039,614     | \$5,704,285,087  | \$2,494,379,901  | \$241,011,451    | \$211,228,665    | \$8,705,944,718     |
| Total costs for hospitalizations for which CCR is not available†  | \$15,708,306     | \$1,549,283,830  | \$624,842,165    | \$57,553,535     | \$48,772,699     | \$2,296,160,534     |
| Total inpatient costs                                             | \$4,120,151,470  | \$4,583,199,154  | \$4,588,734,258  | \$4,677,438,421  | \$4,749,152,954  | \$22,718,676,256    |

\*Average CCR was estimated by dividing the total of costs for all hospitalizations for which cost-to-charge ratios were available by the total charges for hospitalizations for which cost-to-charge ratios were available in a given state-year.

†Total charges for hospitalization for which CCR is not available multiplied by Average CCR in a given state-year.

| <b>New York</b>                                                   | <b>2010</b>       | <b>2011</b>       | <b>2012</b>       | <b>2013</b>       | <b>2014</b>       | <b>2010 to 2014</b> |
|-------------------------------------------------------------------|-------------------|-------------------|-------------------|-------------------|-------------------|---------------------|
| Total hospitalizations, n                                         | 2,417,298         | 2,414,985         | 2,389,701         | 2,290,502         | 2,213,797         | 11,726,283          |
| Hospitalizations for which CCR is available, n (%)                | 2,189,513 (90.6%) | 2,157,629 (89.3%) | 2,168,880 (90.8%) | 2,056,367 (89.8%) | 2,021,199 (91.3%) | 10,593,588 (90.3%)  |
| Total charges for hospitalizations for which CCR is available     | \$66,303,900,691  | \$69,885,515,755  | \$74,728,795,811  | \$77,680,292,105  | \$79,252,368,106  | \$367,850,872,468   |
| Total costs for hospitalizations for which CCR is available       | \$22,376,381,374  | \$23,448,311,348  | \$24,539,963,919  | \$24,331,920,273  | \$23,892,478,440  | \$118,589,055,354   |
| Average CCR*                                                      | 0.3375            | 0.3355            | 0.3283            | 0.3132            | 0.3014            |                     |
| Hospitalizations for which CCR is not available, n (%)            | 227,785 (9.4%)    | 257,356 (10.7%)   | 220,821 (9.2%)    | 234,135 (10.2%)   | 192,598 (8.7%)    | 1,132,695 (9.7%)    |
| Total charges for hospitalizations for which CCR is not available | \$4,168,104,163   | \$4,821,903,339   | \$4,088,909,686   | \$5,687,320,556   | \$5,336,461,039   | \$24,102,698,783    |
| Total costs for hospitalizations for which CCR is not available†  | \$1,406,735,155   | \$1,617,748,571   | \$1,342,797,941   | \$1,781,268,798   | \$1,608,409,357   | \$7,756,959,821     |
| Total inpatient costs                                             | \$23,783,116,529  | \$25,066,059,919  | \$25,882,761,860  | \$26,113,189,071  | \$25,500,887,797  | \$126,346,015,175   |

\*Average CCR was estimated by dividing the total of costs for all hospitalizations for which cost-to-charge ratios were available by the total charges for hospitalizations for which cost-to-charge ratios were available in a given state-year.

†Total charges for hospitalization for which CCR is not available multiplied by Average CCR in a given state-year.

| <b>Oklahoma</b>                                               | <b>2010</b>      | <b>2011</b>      | <b>2012</b>      | <b>2013</b>      | <b>2014</b>      | <b>2010 to 2014</b> |
|---------------------------------------------------------------|------------------|------------------|------------------|------------------|------------------|---------------------|
| Total hospitalizations, n                                     | 489,724          | 476,605          | 476,728          | 452,724          | 439,207          | 2,334,988           |
| Hospitalizations for which CCR is available, n (%)            | 489724 (100%)    | 476605 (100%)    | 476728 (100%)    | 452724 (100%)    | 439207 (100%)    | 2334988 (100%)      |
| Total charges for hospitalizations for which CCR is available | \$13,927,214,520 | \$14,645,751,657 | \$15,247,598,300 | \$15,596,643,583 | \$15,003,967,132 | \$74,421,175,192    |
| Total costs for hospitalizations for which CCR is available   | \$4,343,898,209  | \$4,568,009,942  | \$4,755,725,910  | \$4,864,593,134  | \$5,001,131,977  | \$23,533,359,171    |
| Average CCR*                                                  | 0.3119           | 0.3119           | 0.3119           | 0.3119           | 0.3119           |                     |

\*Statewide constant CCR (0.3119) used to estimate the total cost across years.

| <b>Oklahoma (sensitivity analysis)</b>                       | <b>2010</b>      | <b>2011</b>      | <b>2012</b>      | <b>2013</b>      | <b>2014</b>      | <b>2010 to 2014</b> |
|--------------------------------------------------------------|------------------|------------------|------------------|------------------|------------------|---------------------|
| Total hospitalization, n                                     | 489,724          | 476,605          | 476,728          | 452,724          | 439,207          | 2,334,988           |
| Hospitalization for which CCR is available, n (%)            | 489724 (100%)    | 476605 (100%)    | 476728 (100%)    | 452724 (100%)    | 439207 (100%)    | 2334988 (100%)      |
| Total charges for hospitalization for which CCR is available | \$13,927,214,520 | \$14,645,751,657 | \$15,247,598,300 | \$15,596,643,583 | \$15,003,967,132 | \$74,421,175,192    |
| Total costs for hospitalization for which CCR is available   | \$4,337,630,962  | \$4,445,717,915  | \$4,413,417,328  | \$4,304,673,629  | \$4,267,557,794  | \$21,768,997,628    |
| Average CCR*                                                 | 0.3114           | 0.3036           | 0.2895           | 0.276            | 0.2662           |                     |

\*Average of the CCRs of New York and Colorado for any given state-year.

**eTable 2.** International Classification of Diseases-9<sup>th</sup> Edition (ICD-9) codes defining each medical diagnosis.

**Chronic pain**

| ICD-9 Code | Short Description          | Long Description                 |
|------------|----------------------------|----------------------------------|
| 338.21     | Chronic pain d/t trauma    | Chronic pain due to trauma       |
| 338.22     | Chronic post-thoracot pain | Chronic post-thoracotomy pain    |
| 338.28     | Chronic postop pain NEC    | Other chronic postoperative pain |
| 338.29     | Chronic pain NEC           | Other chronic pain               |
| 338.4      | Chronic pain syndrome      | Chronic pain syndrome            |

**Nausea or vomiting**

| ICD-9 Code | Short Description    | Long Description     |
|------------|----------------------|----------------------|
| 787.03     | Vomiting alone       | Vomiting alone       |
| 787.02     | Nausea alone         | Nausea alone         |
| 787.01     | Nausea with vomiting | Nausea with vomiting |

**Spasticity**

| ICD-9 Code | Short Description | Long Description |
|------------|-------------------|------------------|
| 728.85     | Spasm of muscle   | Spasm of muscle  |

**Short-term sleep disorders**

| ICD-9 Code | Short Description        | Long Description                                         |
|------------|--------------------------|----------------------------------------------------------|
| 307.4      | Nonorganic sleep dis NOS | Nonorganic sleep disorder, unspecified                   |
| 307.41     | Transient insomnia       | Transient disorder of initiating or maintaining sleep    |
| 307.42     | Persistent insomnia      | Persistent disorder of initiating or maintaining sleep   |
| 307.45     | Nonorganic circadian rhy | Circadian rhythm sleep disorder of nonorganic origin     |
| 307.47     | Sleep stage dysfunc NEC  | Other dysfunctions of sleep stages or arousal from sleep |
| 307.49     | Nonorganic sleep dis NEC | Other specific disorders of sleep of nonorganic origin   |

**Increased appetite and weight gain**

| ICD-9 Code | Short Description    | Long Description     |
|------------|----------------------|----------------------|
| 783.1      | Abnormal weight gain | Abnormal weight gain |
| 783.6      | Polyphagia           | Polyphagia           |

**Tourette's syndrome**

| ICD-9 Code | Short Description   | Long Description    |
|------------|---------------------|---------------------|
| 307.23     | Tourette's disorder | Tourette's disorder |

**Posttraumatic stress disorder**

| ICD-9 Code | Short Description        | Long Description              |
|------------|--------------------------|-------------------------------|
| 309.81     | Posttraumatic stress dis | Posttraumatic stress disorder |

**Non-seminoma-type testicular germ cell cancer**

| ICD-9 Code | Short Description    | Long Description                                   |
|------------|----------------------|----------------------------------------------------|
| 186.9      | Malig neo testis NEC | Malignant neoplasm of other and unspecified testis |

**Acute myocardial infarction**

| ICD-9 Code | Short Description        | Long Description                                                                 |
|------------|--------------------------|----------------------------------------------------------------------------------|
| 410        | AMI anterolateral,unspec | Acute myocardial infarction of anterolateral wall, episode of care unspecified   |
| 410.01     | AMI anterolateral, init  | Acute myocardial infarction of anterolateral wall, initial episode of care       |
| 410.02     | AMI anterolateral,subseq | Acute myocardial infarction of anterolateral wall, subsequent episode of care    |
| 410.1      | AMI anterior wall,unspec | Acute myocardial infarction of other anterior wall, episode of care unspecified  |
| 410.11     | AMI anterior wall, init  | Acute myocardial infarction of other anterior wall, initial episode of care      |
| 410.12     | AMI anterior wall,subseq | Acute myocardial infarction of other anterior wall, subsequent episode of care   |
| 410.2      | AMI inferolateral,unspec | Acute myocardial infarction of inferolateral wall, episode of care unspecified   |
| 410.21     | AMI inferolateral, init  | Acute myocardial infarction of inferolateral wall, initial episode of care       |
| 410.22     | AMI inferolateral,subseq | Acute myocardial infarction of inferolateral wall, subsequent episode of care    |
| 410.3      | AMI inferopost, unspec   | Acute myocardial infarction of inferoposterior wall, episode of care unspecified |
| 410.31     | AMI inferopost, initial  | Acute myocardial infarction of inferoposterior wall, initial episode of care     |
| 410.32     | AMI inferopost, subseq   | Acute myocardial infarction of inferoposterior wall, subsequent episode of care  |
| 410.4      | AMI inferior wall,unspec | Acute myocardial infarction of other inferior wall, episode of care unspecified  |
| 410.41     | AMI inferior wall, init  | Acute myocardial infarction of other inferior wall, initial episode of care      |
| 410.42     | AMI inferior wall,subseq | Acute myocardial infarction of other inferior wall, subsequent episode of care   |
| 410.5      | AMI lateral NEC, unspec  | Acute myocardial infarction of other lateral wall, episode of care unspecified   |
| 410.51     | AMI lateral NEC, initial | Acute myocardial infarction of other lateral wall, initial episode of care       |
| 410.52     | AMI lateral NEC, subseq  | Acute myocardial infarction of other lateral wall, subsequent episode of care    |
| 410.6      | True post infarct,unspec | True posterior wall infarction, episode of care unspecified                      |
| 410.61     | True post infarct, init  | True posterior wall infarction, initial episode of care                          |

|        |                          |                                                                                   |
|--------|--------------------------|-----------------------------------------------------------------------------------|
| 410.62 | True post infarct,subseq | True posterior wall infarction, subsequent episode of care                        |
| 410.7  | Subendo infarct, unspec  | Subendocardial infarction, episode of care unspecified                            |
| 410.71 | Subendo infarct, initial | Subendocardial infarction, initial episode of care                                |
| 410.72 | Subendo infarct, subseq  | Subendocardial infarction, subsequent episode of care                             |
| 410.8  | AMI NEC, unspecified     | Acute myocardial infarction of other specified sites, episode of care unspecified |
| 410.81 | AMI NEC, initial         | Acute myocardial infarction of other specified sites, initial episode of care     |
| 410.82 | AMI NEC, subsequent      | Acute myocardial infarction of other specified sites, subsequent episode of care  |
| 410.9  | AMI NOS, unspecified     | Acute myocardial infarction of unspecified site, episode of care unspecified      |
| 410.91 | AMI NOS, initial         | Acute myocardial infarction of unspecified site, initial episode of care          |
| 410.92 | AMI NOS, subsequent      | Acute myocardial infarction of unspecified site, subsequent episode of care       |

**Ischemic stroke**

| ICD-9 Code | Short Description        | Long Description                                                                               |
|------------|--------------------------|------------------------------------------------------------------------------------------------|
| 435.8      | Trans cereb ischemia NEC | Other specified transient cerebral ischemias                                                   |
| 435.9      | Trans cereb ischemia NOS | Unspecified transient cerebral ischemia                                                        |
| 433.01     | Ocl bslr art w infrc     | Occlusion and stenosis of basilar artery with cerebral infarction                              |
| 433.11     | Ocl crtd art w infrc     | Occlusion and stenosis of carotid artery with cerebral infarction                              |
| 433.21     | Ocl vrtb art w infrc     | Occlusion and stenosis of vertebral artery with cerebral infarction                            |
| 433.31     | Ocl mlt bi art w infrc   | Occlusion and stenosis of multiple and bilateral precerebral arteries with cerebral infarction |
| 433.81     | Ocl spcf art w infrc     | Occlusion and stenosis of other specified precerebral artery with cerebral infarction          |
| 433.91     | Ocl art NOS w infrc      | Occlusion and stenosis of unspecified precerebral artery with cerebral infarction              |
| 434.91     | Crbl art ocl NOS w infrc | Cerebral artery occlusion, unspecified with cerebral infarction                                |

**Brain hemorrhage**

| ICD-9 Code | Short Description        | Long Description                    |
|------------|--------------------------|-------------------------------------|
| 430        | Subarachnoid hemorrhage  | Subarachnoid hemorrhage             |
| 431        | Intracerebral hemorrhage | Intracerebral hemorrhage            |
| 432        | Nontraum extradural hem  | Nontraumatic extradural hemorrhage  |
| 432.1      | Subdural hemorrhage      | Subdural hemorrhage                 |
| 432.9      | Intracranial hemorr NOS  | Unspecified intracranial hemorrhage |

**Metabolic syndrome and diabetes**

| ICD-9 Code | Short Description        | Long Description                                                                                           |
|------------|--------------------------|------------------------------------------------------------------------------------------------------------|
| 277.7      | Dysmetabolic syndrome x  | Dysmetabolic syndrome X                                                                                    |
| 250        | DMII wo cmp nt st uncntr | Diabetes mellitus without mention of complication, type II or unspecified type, not stated as uncontrolled |
| 250.02     | DMII wo cmp uncntrld     | Diabetes mellitus without mention of complication, type II or unspecified type, uncontrolled               |
| 250.1      | DMII keto nt st uncntrld | Diabetes with ketoacidosis, type II or unspecified type, not stated as uncontrolled                        |
| 250.12     | DMII ketoacd uncntrld    | Diabetes with ketoacidosis, type II or unspecified type, uncontrolled                                      |
| 250.2      | DMII hprsm nt st uncntrl | Diabetes with hyperosmolarity, type II or unspecified type, not stated as uncontrolled                     |
| 250.22     | DMII hprosmrlr uncntrld  | Diabetes with hyperosmolarity, type II or unspecified type, uncontrolled                                   |
| 250.3      | DMII o cm nt st uncntrld | Diabetes with other coma, type II or unspecified type, not stated as uncontrolled                          |
| 250.32     | DMII oth coma uncntrld   | Diabetes with other coma, type II or unspecified type, uncontrolled                                        |
| 250.4      | DMII renl nt st uncntrld | Diabetes with renal manifestations, type II or unspecified type, not stated as uncontrolled                |
| 250.42     | DMII renal uncntrld      | Diabetes with renal manifestations, type II or unspecified type, uncontrolled                              |
| 250.5      | DMII ophth nt st uncntrl | Diabetes with ophthalmic manifestations, type II or unspecified type, not stated as uncontrolled           |
| 250.52     | DMII ophth uncntrld      | Diabetes with ophthalmic manifestations, type II or unspecified type, uncontrolled                         |
| 250.6      | DMII neuro nt st uncntrl | Diabetes with neurological manifestations, type II or unspecified type, not stated as uncontrolled         |
| 250.62     | DMII neuro uncntrld      | Diabetes with neurological manifestations, type II or unspecified type, uncontrolled                       |
| 250.7      | DMII circ nt st uncntrld | Diabetes with peripheral circulatory disorders, type II or unspecified type, not stated as uncontrolled    |
| 250.72     | DMII circ uncntrld       | Diabetes with peripheral circulatory disorders, type II or unspecified type, uncontrolled                  |
| 250.8      | DMII oth nt st uncntrld  | Diabetes with other specified manifestations, type II or unspecified type, not stated as uncontrolled      |
| 250.82     | DMII oth uncntrld        | Diabetes with other specified manifestations, type II or unspecified type, uncontrolled                    |
| 250.9      | DMII unspf nt st uncntrl | Diabetes with unspecified complication, type II or unspecified type, not stated as uncontrolled            |

|        |                     |                                                                                   |
|--------|---------------------|-----------------------------------------------------------------------------------|
| 250.92 | DMII unspf uncntrld | Diabetes with unspecified complication, type II or unspecified type, uncontrolled |
|--------|---------------------|-----------------------------------------------------------------------------------|

**Prediabetes**

| ICD-9 Code | Short Description    | Long Description       |
|------------|----------------------|------------------------|
| 790.29     | Abnormal glucose NEC | Other abnormal glucose |

**Bronchitis**

| ICD-9 Code | Short Description        | Long Description                                         |
|------------|--------------------------|----------------------------------------------------------|
| 466        | Acute bronchitis         | Acute bronchitis                                         |
| 490        | Bronchitis NOS           | Bronchitis, not specified as acute or chronic            |
| 491        | Simple chr bronchitis    | Simple chronic bronchitis                                |
| 491.1      | Mucopurul chr bronchitis | Mucopurulent chronic bronchitis                          |
| 491.2      | Obst chr bronc w/o exac  | Obstructive chronic bronchitis without exacerbation      |
| 491.21     | Obs chr bronc w(ac) exac | Obstructive chronic bronchitis with (acute) exacerbation |
| 491.22     | Obs chr bronc w ac bronc | Obstructive chronic bronchitis with acute bronchitis     |
| 491.8      | Chronic bronchitis NEC   | Other chronic bronchitis                                 |
| 491.9      | Chronic bronchitis NOS   | Unspecified chronic bronchitis                           |

**Motor vehicle accidents**

| ICD-9 Code | Short Description       | Long Description                                                                                                                       |
|------------|-------------------------|----------------------------------------------------------------------------------------------------------------------------------------|
| E812.0     | Mv collision NOS-driver | Other motor vehicle traffic accident involving collision with motor vehicle injuring driver of motor vehicle other than motorcycle     |
| E812.1     | Mv collision NOS-pasngr | Other motor vehicle traffic accident involving collision with motor vehicle injuring passenger in motor vehicle other than motorcycle  |
| E812.2     | Mv collis NOS-motorcycl | Other motor vehicle traffic accident involving collision with motor vehicle injuring motorcyclist                                      |
| E812.3     | Mv coll NOS-mcycl psngr | Other motor vehicle traffic accident involving collision with motor vehicle injuring passenger on motorcycle                           |
| E812.4     | Mv collision NOS-st car | Other motor vehicle traffic accident involving collision with motor vehicle injuring occupant of streetcar                             |
| E812.5     | Mv coll NOS-anim rid    | Other motor vehicle traffic accident involving collision with motor vehicle injuring rider of animal; occupant of animal-drawn vehicle |
| E812.6     | Mv coll NOS-ped cycl    | Other motor vehicle traffic accident involving collision with motor vehicle injuring pedal cyclist                                     |
| E812.7     | Mv collision NOS-pedest | Other motor vehicle traffic accident involving collision with motor vehicle injuring pedestrian                                        |



|        |                          |                                                                                                                                  |
|--------|--------------------------|----------------------------------------------------------------------------------------------------------------------------------|
| E812.8 | Mv collis NOS-pers NEC   | Other motor vehicle traffic accident involving collision with motor vehicle injuring other specified person                      |
| E812.9 | Mv collis NOS-pers NOS   | Other motor vehicle traffic accident involving collision with motor vehicle injuring unspecified person                          |
| E813.0 | Mv-oth veh coll-driver   | Motor vehicle traffic accident involving collision with other vehicle injuring driver of motor vehicle other than motorcycle     |
| E813.1 | Mv-oth veh coll-pasngr   | Motor vehicle traffic accident involving collision with other vehicle injuring passenger in motor vehicle other than motorcycle  |
| E813.2 | Mv-oth veh coll-motcycl  | Motor vehicle traffic accident involving collision with other vehicle injuring motorcyclist                                      |
| E813.3 | Mv-oth veh coll-mcyc psg | Motor vehicle traffic accident involving collision with other vehicle injuring passenger on motorcycle                           |
| E813.4 | Mv-oth veh coll-st car   | Motor vehicle traffic accident involving collision with other vehicle injuring occupant of streetcar                             |
| E813.5 | Mv-oth veh coll-anim rid | Motor vehicle traffic accident involving collision with other vehicle injuring rider of animal; occupant of animal-drawn vehicle |
| E813.6 | Mv-oth veh coll-ped cycl | Motor vehicle traffic accident involving collision with other vehicle injuring pedal cyclist                                     |
| E813.7 | Mv-oth veh coll-pedest   | Motor vehicle traffic accident involving collision with other vehicle injuring pedestrian                                        |
| E813.8 | Mv-oth veh coll-pers NEC | Motor vehicle traffic accident involving collision with other vehicle injuring other specified person                            |
| E813.9 | Mv-oth veh coll-pers NOS | Motor vehicle traffic accident involving collision with other vehicle injuring unspecified person                                |
| E814.0 | Mv coll w pedest-driver  | Motor vehicle traffic accident involving collision with pedestrian injuring driver of motor vehicle other than motorcycle        |
| E814.1 | Mv coll w pedest-pasngr  | Motor vehicle traffic accident involving collision with pedestrian injuring passenger in motor vehicle other than motorcycle     |
| E814.2 | Mv coll w pedest-motcycl | Motor vehicle traffic accident involving collision with pedestrian injuring motorcyclist                                         |
| E814.3 | Mv coll w ped-mcycl psgr | Motor vehicle traffic accident involving collision with pedestrian injuring passenger on motorcycle                              |
| E814.4 | Mv coll w pedest-st car  | Motor vehicle traffic accident involving collision with pedestrian injuring occupant of streetcar                                |
| E814.5 | Mv coll w ped-anim rid   | Motor vehicle traffic accident involving collision with pedestrian injuring rider of animal; occupant of animal drawn vehicle    |
| E814.6 | Mv coll w ped-ped cycl   | Motor vehicle traffic accident involving collision with pedestrian injuring pedal cyclist                                        |

|        |                          |                                                                                                                                                    |
|--------|--------------------------|----------------------------------------------------------------------------------------------------------------------------------------------------|
| E814.7 | Mv coll w pedest-pedest  | Motor vehicle traffic accident involving collision with pedestrian injuring pedestrian                                                             |
| E814.8 | Mv coll w pedes-pers NEC | Motor vehicle traffic accident involving collision with pedestrian injuring other specified person                                                 |
| E814.9 | Mv coll w pedes-pers NOS | Motor vehicle traffic accident involving collision with pedestrian injuring unspecified person                                                     |
| E815.0 | Mv coll w oth obj-driver | Other motor vehicle traffic accident involving collision on the highway injuring driver of motor vehicle other than motorcycle                     |
| E815.1 | Mv coll w oth obj-pasngr | Other motor vehicle traffic accident involving collision on the highway injuring passenger in motor vehicle other than motorcycle                  |
| E815.2 | Mv coll w oth obj-mocycl | Other motor vehicle traffic accident involving collision on the highway injuring motorcyclist                                                      |
| E815.3 | Mv coll w obj-mcycl psgr | Other motor vehicle traffic accident involving collision on the highway injuring passenger on motorcycle                                           |
| E815.4 | Mv coll w obj-st car     | Other motor vehicle traffic accident involving collision on the highway injuring occupant of streetcar                                             |
| E815.5 | Mv coll w obj-anim rider | Other motor vehicle traffic accident involving collision on the highway injuring rider of animal; occupant of animal-drawn vehicle                 |
| E815.6 | Mv coll w obj-ped cycl   | Other motor vehicle traffic accident involving collision on the highway injuring pedal cyclist                                                     |
| E815.7 | Mv coll w obj-pedest     | Other motor vehicle traffic accident involving collision on the highway injuring pedestrian                                                        |
| E815.8 | Mv coll w obj-pers NEC   | Other motor vehicle traffic accident involving collision on the highway injuring other specified person                                            |
| E815.9 | Mv coll w obj-pers NOS   | Other motor vehicle traffic accident involving collision on the highway injuring unspecified person                                                |
| E816.0 | Loss control mv acc-driv | Motor vehicle traffic accident due to loss of control, without collision on the highway, injuring driver of motor vehicle other than motorcycle    |
| E816.1 | Loss control mv acc-psgr | Motor vehicle traffic accident due to loss of control, without collision on the highway, injuring passenger in motor vehicle other than motorcycle |
| E816.2 | Loss control mv-mocycl   | Motor vehicle traffic accident due to loss of control, without collision on the highway, injuring motorcyclist                                     |
| E816.3 | Loss control mv-mcyc psg | Motor vehicle traffic accident due to loss of control, without collision on the highway, injuring passenger on motorcycle                          |

|        |                          |                                                                                                                                                     |
|--------|--------------------------|-----------------------------------------------------------------------------------------------------------------------------------------------------|
| E816.4 | Loss cont mv acc-st car  | Motor vehicle traffic accident due to loss of control, without collision on the highway, injuring occupant of streetcar                             |
| E816.5 | Loss cont mv-anim rider  | Motor vehicle traffic accident due to loss of control, without collision on the highway, injuring rider of animal; occupant of animal-drawn vehicle |
| E816.6 | Loss control mv-ped cycl | Motor vehicle traffic accident due to loss of control, without collision on the highway, injuring pedal cyclist                                     |
| E816.7 | Loss control mv-pedest   | Motor vehicle traffic accident due to loss of control, without collision on the highway, injuring pedestrian                                        |
| E816.8 | Loss control mv-pers NEC | Motor vehicle traffic accident due to loss of control, without collision on the highway, injuring other specified person                            |
| E816.9 | Loss control mv-pers NOS | Motor vehicle traffic accident due to loss of control, without collision on the highway, injuring unspecified person                                |
| E819.0 | Traffic acc NOS-driver   | Motor vehicle traffic accident of unspecified nature injuring driver of motor vehicle other than motorcycle                                         |
| E819.1 | Traffic acc NOS-pasngr   | Motor vehicle traffic accident of unspecified nature injuring passenger in motor vehicle other than motorcycle                                      |
| E819.2 | Traffic acc NOS-motcycl  | Motor vehicle traffic accident of unspecified nature injuring motorcyclist                                                                          |
| E819.3 | Traff acc NOS-mcycl psgr | Motor vehicle traffic accident of unspecified nature injuring passenger on motorcycle                                                               |
| E819.4 | Traffic acc NOS-st car   | Motor vehicle traffic accident of unspecified nature injuring occupant of streetcar                                                                 |
| E819.5 | Traff acc NOS-anim rider | Motor vehicle traffic accident of unspecified nature injuring rider of animal; occupant of animal-drawn vehicle                                     |
| E819.6 | Traffic acc NOS-ped cycl | Motor vehicle traffic accident of unspecified nature injuring pedal cyclist                                                                         |
| E819.7 | Traffic acc NOS-pedest   | Motor vehicle traffic accident of unspecified nature injuring pedestrian                                                                            |
| E819.8 | Traffic acc NOS-pers NEC | Motor vehicle traffic accident of unspecified nature injuring other specified person                                                                |
| E819.9 | Traffic acc NOS-pers NOS | Motor vehicle traffic accident of unspecified nature injuring unspecified person                                                                    |

**Overdose injuries**

| ICD-9 Code | Short Description | Long Description                                                                     |
|------------|-------------------|--------------------------------------------------------------------------------------|
| E950.0     | Poison-analgesics | Suicide and self-inflicted poisoning by analgesics, antipyretics, and antirheumatics |

|        |                         |                                                                                        |
|--------|-------------------------|----------------------------------------------------------------------------------------|
| E950.1 | Poison-barbiturates     | Suicide and self-inflicted poisoning by barbiturates                                   |
| E950.2 | Poison-sedat/hypnotic   | Suicide and self-inflicted poisoning by other sedatives and hypnotics                  |
| E950.3 | Poison-psychotropic agt | Suicide and self-inflicted poisoning by tranquilizers and other psychotropic agents    |
| E950.4 | Poison-drug/medicin NEC | Suicide and self-inflicted poisoning by other specified drugs and medicinal substances |
| E950.5 | Poison-drug/medicin NOS | Suicide and self-inflicted poisoning by unspecified drug or medicinal substance        |

**Assault-based gunshot injuries**

| ICD-9 Code | Short Description       | Long Description                         |
|------------|-------------------------|------------------------------------------|
| E965.0     | Assault-handgun         | Assault by handgun                       |
| E965.1     | Assault-shotgun         | Assault by shotgun                       |
| E965.2     | Assault-hunting rifle   | Assault by hunting rifle                 |
| E965.3     | Assault-military weapon | Assault by military firearms             |
| E965.4     | Assault-firearm NEC     | Assault by other and unspecified firearm |

**Low offspring birthweight**

| ICD-9 Code | Short Description        | Long Description                                            |
|------------|--------------------------|-------------------------------------------------------------|
| 764.9      | Fet growth retard wtNOS  | Fetal growth retardation, unspecified, unspecified [weight] |
| 764.91     | Fet growth retard <500g  | Fetal growth retardation, unspecified, less than 500 grams  |
| 764.92     | Fet growth ret 500-749g  | Fetal growth retardation, unspecified, 500-749 grams        |
| 764.93     | Fet growth ret 750-999g  | Fetal growth retardation, unspecified, 750-999 grams        |
| 764.94     | Fet grwth ret 1000-1249g | Fetal growth retardation, unspecified, 1,000-1,249 grams    |
| 764.95     | Fet grwth ret 1250-1499g | Fetal growth retardation, unspecified, 1,250-1,499 grams    |
| 764.96     | Fet grwth ret 1500-1749g | Fetal growth retardation, unspecified, 1,500-1,749 grams    |
| 764.97     | Fet grwth ret 1750-1999g | Fetal growth retardation, unspecified, 1,750-1,999 grams    |
| 764.98     | Fet grwth ret 2000-2499g | Fetal growth retardation, unspecified, 2,000-2,499 grams    |
| 764.99     | Fet growth ret 2500+g    | Fetal growth retardation, unspecified, 2,500 grams and over |

**Maternal pregnancy complications**

| ICD-9 Code | Short Description       | Long Description                                                                                   |
|------------|-------------------------|----------------------------------------------------------------------------------------------------|
| 640.8      | Hem early preg NEC-unsp | Other specified hemorrhage in early pregnancy, unspecified as to episode of care or not applicable |

|        |                           |                                                                                                                                                  |
|--------|---------------------------|--------------------------------------------------------------------------------------------------------------------------------------------------|
| 640.81 | Hem early preg NEC-deliv  | Other specified hemorrhage in early pregnancy, delivered, with or without mention of antepartum condition                                        |
| 640.83 | Hem early pg NEC-anteapar | Other specified hemorrhage in early pregnancy, antepartum condition or complication                                                              |
| 640.9  | Hemorr early preg-unspec  | Unspecified hemorrhage in early pregnancy, unspecified as to episode of care or not applicable                                                   |
| 640.91 | Hem early preg-delivered  | Unspecified hemorrhage in early pregnancy, delivered, with or without mention of antepartum condition                                            |
| 640.93 | Hem early preg-anteapart  | Unspecified hemorrhage in early pregnancy, antepartum condition or complication                                                                  |
| 641    | Placenta previa-unspec    | Placenta previa without hemorrhage, unspecified as to episode of care or not applicable                                                          |
| 641.01 | Placenta previa-deliver   | Placenta previa without hemorrhage, delivered, with or without mention of antepartum condition                                                   |
| 641.03 | Placenta previa-anteapart | Placenta previa without hemorrhage, antepartum condition or complication                                                                         |
| 641.1  | Placenta prev hem-unspec  | Hemorrhage from placenta previa, unspecified as to episode of care or not applicable                                                             |
| 641.11 | Placenta prev hem-deliv   | Hemorrhage from placenta previa, delivered, with or without mention of antepartum condition                                                      |
| 641.13 | Placen prev hem-anteapart | Hemorrhage from placenta previa, antepartum condition or complication                                                                            |
| 641.2  | Prem separ placen-unspec  | Premature separation of placenta, unspecified as to episode of care or not applicable                                                            |
| 641.21 | Prem separ placen-deliv   | Premature separation of placenta, delivered, with or without mention of antepartum condition                                                     |
| 641.23 | Prem separ plac-anteapart | Premature separation of placenta, antepartum condition or complication                                                                           |
| 642    | Essen hyperten preg-unsp  | Benign essential hypertension complicating pregnancy, childbirth, and the puerperium, unspecified as to episode of care or not applicable        |
| 642.01 | Essen hyperten-delivered  | Benign essential hypertension complicating pregnancy, childbirth, and the puerperium, delivered, with or without mention of antepartum condition |
| 642.02 | Essen hyperten-del w p/p  | Benign essential hypertension, complicating pregnancy, childbirth, and the puerperium, delivered, with mention of postpartum complication        |
| 642.03 | Essen hyperten-anteapart  | Benign essential hypertension complicating pregnancy, childbirth, and the puerperium, antepartum condition or complication                       |

|        |                          |                                                                                                                                  |
|--------|--------------------------|----------------------------------------------------------------------------------------------------------------------------------|
| 642.04 | Essen hyperten-postpart  | Benign essential hypertension complicating pregnancy, childbirth, and the puerperium, postpartum condition or complication       |
| 642.3  | Trans hyperten preg-unsp | Transient hypertension of pregnancy, unspecified as to episode of care or not applicable                                         |
| 642.31 | Trans hyperten-delivered | Transient hypertension of pregnancy, delivered , with or without mention of antepartum condition                                 |
| 642.32 | Trans hyperten-del w p/p | Transient hypertension of pregnancy, delivered, with mention of postpartum complication                                          |
| 642.33 | Trans hyperten-antepart  | Transient hypertension of pregnancy, antepartum condition or complication                                                        |
| 642.34 | Trans hyperten-postpart  | Transient hypertension of pregnancy, postpartum condition or complication                                                        |
| 642.4  | Mild/NOS preeclamp-unsp  | Mild or unspecified pre-eclampsia, unspecified as to episode of care or not applicable                                           |
| 642.41 | Mild/NOS preeclamp-deliv | Mild or unspecified pre-eclampsia, delivered, with or without mention of antepartum condition                                    |
| 642.42 | Mild preeclamp-del w p/p | Mild or unspecified pre-eclampsia, delivered, with mention of postpartum complication                                            |
| 642.43 | Mild/NOS preeclamp-antep | Mild or unspecified pre-eclampsia, antepartum condition or complication                                                          |
| 642.44 | Mild/NOS preeclamp-p/p   | Mild or unspecified pre-eclampsia, postpartum condition or complication                                                          |
| 642.5  | Severe preeclamp-unspec  | Severe pre-eclampsia, unspecified as to episode of care or not applicable                                                        |
| 642.51 | Severe preeclamp-deliver | Severe pre-eclampsia, delivered, with or without mention of antepartum condition                                                 |
| 642.52 | Sev preeclamp-del w p/p  | Severe pre-eclampsia, delivered, with mention of postpartum complication                                                         |
| 642.53 | Sev preeclamp-antepartum | Severe pre-eclampsia, antepartum condition or complication                                                                       |
| 642.54 | Sev preeclamp-postpartum | Severe pre-eclampsia, postpartum condition or complication                                                                       |
| 642.6  | Eclampsia-unspecified    | Eclampsia, unspecified as to episode of care or not applicable                                                                   |
| 642.61 | Eclampsia-delivered      | Eclampsia, delivered, with or without mention of antepartum condition                                                            |
| 642.62 | Eclampsia-deliv w p/p    | Eclampsia, delivered, with mention of postpartum complication                                                                    |
| 642.63 | Eclampsia-antepartum     | Eclampsia, antepartum condition or complication                                                                                  |
| 642.64 | Eclampsia-postpartum     | Eclampsia, postpartum condition or complication                                                                                  |
| 642.7  | Tox w old hyperten-unsp  | Pre-eclampsia or eclampsia superimposed on pre-existing hypertension, unspecified as to episode of care or not applicable        |
| 642.71 | Tox w old hyperten-deliv | Pre-eclampsia or eclampsia superimposed on pre-existing hypertension, delivered, with or without mention of antepartum condition |



|        |                           |                                                                                                                                            |
|--------|---------------------------|--------------------------------------------------------------------------------------------------------------------------------------------|
| 642.72 | Tox w old hyp-del w p/p   | Pre-eclampsia or eclampsia superimposed on pre-existing hypertension, delivered, with mention of postpartum complication                   |
| 642.73 | Tox w old hyper-ante part | Pre-eclampsia or eclampsia superimposed on pre-existing hypertension, antepartum condition or complication                                 |
| 642.74 | Tox w old hyper-postpart  | Pre-eclampsia or eclampsia superimposed on pre-existing hypertension, postpartum condition or complication                                 |
| 642.9  | Hyperten preg NOS-unspec  | Unspecified hypertension complicating pregnancy, childbirth, or the puerperium, unspecified as to episode of care or not applicable        |
| 642.91 | Hypertens NOS-delivered   | Unspecified hypertension complicating pregnancy, childbirth, or the puerperium, delivered, with or without mention of antepartum condition |
| 642.92 | Hypertens NOS-del w p/p   | Unspecified hypertension complicating pregnancy, childbirth, or the puerperium, delivered, with mention of postpartum complication         |
| 642.93 | Hypertens NOS-ante partum | Unspecified hypertension complicating pregnancy, childbirth, or the puerperium, antepartum condition or complication                       |
| 642.94 | Hypertens NOS-postpartum  | Unspecified hypertension complicating pregnancy, childbirth, or the puerperium, postpartum condition or complication                       |
| 646.8  | Preg compl NEC-unspec     | Other specified complications of pregnancy, unspecified as to episode of care or not applicable                                            |
| 646.81 | Preg compl NEC-delivered  | Other specified complications of pregnancy, delivered, with or without mention of antepartum condition                                     |
| 646.82 | Preg compl NEC-del w p/p  | Other specified complications of pregnancy, delivered, with mention of postpartum complication                                             |
| 646.83 | Preg compl NEC-ante part  | Other specified complications of pregnancy, antepartum condition or complication                                                           |
| 646.84 | Preg compl NEC-postpart   | Other specified complications of pregnancy, postpartum condition or complication                                                           |
| 646.9  | Preg compl NOS-unspec     | Unspecified complication of pregnancy, unspecified as to episode of care or not applicable                                                 |

#### Unemployment or low income

| ICD-9 Code | Short Description | Long Description |
|------------|-------------------|------------------|
| V62.0      | Unemployment      | Unemployment     |

**Schizophrenia or other psychoses**

| ICD-9 Code | Short Description        | Long Description                                                    |
|------------|--------------------------|---------------------------------------------------------------------|
| 295        | Simpl schizophren-unspec | Simple type schizophrenia, unspecified                              |
| 295.01     | Simpl schizophren-subchr | Simple type schizophrenia, subchronic                               |
| 295.02     | Simple schizophren-chr   | Simple type schizophrenia, chronic                                  |
| 295.03     | Simp schiz-subchr/exacer | Simple type schizophrenia, subchronic with acute exacerbation       |
| 295.04     | Simpl schizo-chr/exacerb | Simple type schizophrenia, chronic with acute exacerbation          |
| 295.05     | Simpl schizophren-remiss | Simple type schizophrenia, in remission                             |
| 295.1      | Hebephrenia-unspec       | Disorganized type schizophrenia, unspecified                        |
| 295.11     | Hebephrenia-subchronic   | Disorganized type schizophrenia, subchronic                         |
| 295.12     | Hebephrenia-chronic      | Disorganized type schizophrenia, chronic                            |
| 295.13     | Hebephren-subchr/exacerb | Disorganized type schizophrenia, subchronic with acute exacerbation |
| 295.14     | Hebephrenia-chr/exacerb  | Disorganized type schizophrenia, chronic with acute exacerbation    |
| 295.15     | Hebephrenia-remission    | Disorganized type schizophrenia, in remission                       |
| 295.2      | Catatonia-unspec         | Catatonic type schizophrenia, unspecified                           |
| 295.21     | Catatonia-subchronic     | Catatonic type schizophrenia, subchronic                            |
| 295.22     | Catatonia-chronic        | Catatonic type schizophrenia, chronic                               |
| 295.23     | Catatonia-subchr/exacerb | Catatonic type schizophrenia, subchronic with acute exacerbation    |
| 295.24     | Catatonia-chr/exacerb    | Catatonic type schizophrenia, chronic with acute exacerbation       |
| 295.25     | Catatonia-remission      | Catatonic type schizophrenia, in remission                          |
| 295.3      | Paranoid schizo-unspec   | Paranoid type schizophrenia, unspecified                            |
| 295.31     | Paranoid schizo-subchr   | Paranoid type schizophrenia, subchronic                             |
| 295.32     | Paranoid schizo-chronic  | Paranoid type schizophrenia, chronic                                |
| 295.33     | Paran schizo-subchr/exac | Paranoid type schizophrenia, subchronic with acute exacerbation     |
| 295.34     | Paran schizo-chr/exacerb | Paranoid type schizophrenia, chronic with acute exacerbation        |
| 295.35     | Paranoid schizo-remiss   | Paranoid type schizophrenia, in remission                           |
| 295.4      | Schizophreniform dis NOS | Schizophreniform disorder, unspecified                              |
| 295.41     | Schizophrenic dis-subchr | Schizophreniform disorder, subchronic                               |
| 295.42     | Schizophren dis-chronic  | Schizophreniform disorder, chronic                                  |
| 295.43     | Schizo dis-subchr/exacer | Schizophreniform disorder, subchronic with acute exacerbation       |
| 295.44     | Schizophr dis-chr/exacer | Schizophreniform disorder, chronic with acute exacerbation          |
| 295.45     | Schizophrenic dis-remiss | Schizophreniform disorder, in remission                             |
| 295.5      | Latent schizophren-unsp  | Latent schizophrenia, unspecified                                   |
| 295.51     | Lat schizophren-subchr   | Latent schizophrenia, subchronic                                    |
| 295.52     | Latent schizophren-chr   | Latent schizophrenia, chronic                                       |



|        |                           |                                                                                                       |
|--------|---------------------------|-------------------------------------------------------------------------------------------------------|
| 295.53 | Lat schizo-subchr/exacer  | Latent schizophrenia, subchronic with acute exacerbation                                              |
| 295.54 | Latent schizo-chr/exacer  | Latent schizophrenia, chronic with acute exacerbation                                                 |
| 295.55 | Lat schizophren-remiss    | Latent schizophrenia, in remission                                                                    |
| 295.6  | Schizophr dis resid NOS   | Schizophrenic disorders, residual type, unspecified                                                   |
| 295.61 | Schizophr dis resid-subch | Schizophrenic disorders, residual type, subchronic                                                    |
| 295.62 | Schizophr dis resid-chr   | Schizophrenic disorders, residual type, chronic                                                       |
| 295.63 | Schizo resid subchr/exac  | Schizophrenic disorders, residual type, subchronic with acute exacerbation                            |
| 295.64 | Schizophr resid-chro/exac | Schizophrenic disorders, residual type, chronic with acute exacerbation                               |
| 295.65 | Schizophr dis resid-remis | Schizophrenic disorders, residual type, in remission                                                  |
| 296.2  | Depress psychosis-unspec  | Major depressive affective disorder, single episode, unspecified                                      |
| 296.21 | Depress psychosis-mild    | Major depressive affective disorder, single episode, mild                                             |
| 296.22 | Depressive psychosis-mod  | Major depressive affective disorder, single episode, moderate                                         |
| 296.23 | Depress psychosis-severe  | Major depressive affective disorder, single episode, severe, without mention of psychotic behavior    |
| 296.24 | Depr psychos-sev w psych  | Major depressive affective disorder, single episode, severe, specified as with psychotic behavior     |
| 296.25 | Depr psychos-part remiss  | Major depressive affective disorder, single episode, in partial or unspecified remission              |
| 296.26 | Depr psychos-full remiss  | Major depressive affective disorder, single episode, in full remission                                |
| 296.3  | Recurr depr psychos-unsp  | Major depressive affective disorder, recurrent episode, unspecified                                   |
| 296.31 | Recurr depr psychos-mild  | Major depressive affective disorder, recurrent episode, mild                                          |
| 296.32 | Recurr depr psychos-mod   | Major depressive affective disorder, recurrent episode, moderate                                      |
| 296.33 | Recur depr psych-severe   | Major depressive affective disorder, recurrent episode, severe, without mention of psychotic behavior |
| 296.34 | Rec depr psych-psychotic  | Major depressive affective disorder, recurrent episode, severe, specified as with psychotic behavior  |
| 296.35 | Recur depr psyc-part rem  | Major depressive affective disorder, recurrent episode, in partial or unspecified remission           |

|        |                          |                                                                           |
|--------|--------------------------|---------------------------------------------------------------------------|
| 296.36 | Recur depr psyc-full rem | Major depressive affective disorder, recurrent episode, in full remission |
| 298    | React depress psychosis  | Depressive type psychosis                                                 |
| 298.1  | Excitativ type psychosis | Excitative type psychosis                                                 |
| 298.4  | Psychogen paranoid psych | Psychogenic paranoid psychosis                                            |
| 298.8  | React psychosis NEC/NOS  | Other and unspecified reactive psychosis                                  |
| 298.9  | Psychosis NOS            | Unspecified psychosis                                                     |

**Depressive disorders**

| ICD-9 Code | Short Description       | Long Description                              |
|------------|-------------------------|-----------------------------------------------|
| 296.82     | Atypical depressive dis | Atypical depressive disorder                  |
| 311        | Depressive disorder NEC | Depressive disorder, not elsewhere classified |

**Suicide**

| ICD-9 Code | Short Description       | Long Description                                                                                                                                       |
|------------|-------------------------|--------------------------------------------------------------------------------------------------------------------------------------------------------|
| E950.6     | Poison-agricult agent   | Suicide and self-inflicted poisoning by agricultural and horticultural chemical and pharmaceutical preparations other than plant foods and fertilizers |
| E950.7     | Poison-corrosiv/caustic | Suicide and self-inflicted poisoning by corrosive and caustic substances                                                                               |
| E950.8     | Poison-arsenic          | Suicide and self-inflicted poisoning by arsenic and its compounds                                                                                      |
| E950.9     | Poison-solid/liquid NEC | Suicide and self-inflicted poisoning by other and unspecified solid and liquid substances                                                              |
| E951.0     | Poison-piped gas        | Suicide and self-inflicted poisoning by gas distributed by pipeline                                                                                    |
| E951.1     | Poison-gas in container | Suicide and self-inflicted poisoning by liquefied petroleum gas distributed in mobile containers                                                       |
| E951.8     | Poison-utility gas NEC  | Suicide and self-inflicted poisoning by other utility gas                                                                                              |
| E952.0     | Poison-exhaust gas      | Suicide and self-inflicted poisoning by motor vehicle exhaust gas                                                                                      |
| E952.1     | Poison-co NEC           | Suicide and self-inflicted poisoning by other carbon monoxide                                                                                          |
| E952.8     | Poison-gas/vapor NEC    | Suicide and self-inflicted poisoning by other specified gases and vapors                                                                               |
| E952.9     | Poison-gas/vapor NOS    | Suicide and self-inflicted poisoning by unspecified gases and vapors                                                                                   |
| E953.0     | Injury-hanging          | Suicide and self-inflicted injury by hanging                                                                                                           |
| E953.1     | Injury-suff w plas bag  | Suicide and self-inflicted injury by suffocation by plastic bag                                                                                        |
| E953.8     | Injury-strang/suff NEC  | Suicide and self-inflicted injury by other specified means                                                                                             |
| E953.9     | Injury-strang/suff NOS  | Suicide and self-inflicted injury by unspecified means                                                                                                 |

|        |                          |                                                                               |
|--------|--------------------------|-------------------------------------------------------------------------------|
| E954.  | Injury-submersion        | Suicide and self-inflicted injury by submersion [drowning]                    |
| E955.0 | Injury-handgun           | Suicide and self-inflicted injury by handgun                                  |
| E955.1 | Injury-shotgun           | Suicide and self-inflicted injury by shotgun                                  |
| E955.2 | Injury-hunting rifle     | Suicide and self-inflicted injury by hunting rifle                            |
| E955.3 | Injury-military firearm  | Suicide and self-inflicted injury by military firearms                        |
| E955.4 | Injury-firearm NEC       | Suicide and self-inflicted injury by other and unspecified firearm            |
| E955.5 | Injury-explosives        | Suicide and self-inflicted injury by explosives                               |
| E955.6 | Self inflict acc-air gun | Suicide and self-inflicted injury by air gun                                  |
| E955.7 | Self inj-paintball gun   | Suicide and self-inflicted injury by paintball gun                            |
| E955.9 | Injury-firearm/expl NOS  | Suicide and self-inflicted injury by firearms and explosives, unspecified     |
| E956.  | Injury-cut instrument    | Suicide and self-inflicted injury by cutting and piercing instrument          |
| E957.0 | Injury-jump fm residence | Suicide and self-inflicted injuries by jumping from residential premises      |
| E957.1 | Injury-jump fm struc NEC | Suicide and self-inflicted injuries by jumping from other man-made structures |
| E957.2 | Injury-jump fm natur sit | Suicide and self-inflicted injuries by jumping from natural sites             |
| E957.9 | Injury-jump NEC          | Suicide and self-inflicted injuries by jumping from unspecified site          |
| E958.0 | Injury-moving object     | Suicide and self-inflicted injury by jumping or lying before moving object    |
| E958.1 | Injury-burn, fire        | Suicide and self-inflicted injury by burns, fire                              |
| E958.2 | Injury-scald             | Suicide and self-inflicted injury by scald                                    |
| E958.3 | Injury-extreme cold      | Suicide and self-inflicted injury by extremes of cold                         |
| E958.4 | Injury-electrocution     | Suicide and self-inflicted injury by electrocution                            |
| E958.5 | Injury-motor veh crash   | Suicide and self-inflicted injury by crashing of motor vehicle                |
| E958.6 | Injury-aircraft crash    | Suicide and self-inflicted injury by crashing of aircraft                     |
| E958.7 | Injury-caustic substance | Suicide and self-inflicted injury by caustic substances, except poisoning     |
| E958.8 | Injury-NEC               | Suicide and self-inflicted injury by other specified means                    |
| E958.9 | Injury-NOS               | Suicide and self-inflicted injury by unspecified means                        |

### Social anxiety disorder

| ICD-9 Code | Short Description | Long Description |
|------------|-------------------|------------------|
| 300.23     | Social phobia     | Social phobia    |

**Anxiety disorders**

| ICD-9 Code | Short Description        | Long Description                                    |
|------------|--------------------------|-----------------------------------------------------|
| 293.84     | Anxiety disorder oth dis | Anxiety disorder in conditions classified elsewhere |
| 300        | Anxiety state NOS        | Anxiety state, unspecified                          |

**Anxiety disorders (except social anxiety)**

| ICD-9 Code | Short Description         | Long Description                                                        |
|------------|---------------------------|-------------------------------------------------------------------------|
| 300.01     | Panic dis w/o agorophobia | Panic disorder without agoraphobia                                      |
| 300.02     | Generalized anxiety dis   | Generalized anxiety disorder                                            |
| 300.09     | Anxiety state NEC         | Other anxiety states                                                    |
| 300.1      | Hysteria NOS              | Hysteria, unspecified                                                   |
| 300.11     | Conversion disorder       | Conversion disorder                                                     |
| 300.12     | Dissociative amnesia      | Dissociative amnesia                                                    |
| 300.13     | Dissociative fugue        | Dissociative fugue                                                      |
| 300.14     | Dissociative identity dis | Dissociative identity disorder                                          |
| 300.15     | Dissociative react NOS    | Dissociative disorder or reaction, unspecified                          |
| 300.16     | Factitious dis w symptom  | Factitious disorder with predominantly psychological signs and symptoms |
| 300.19     | Factitious ill NEC/NOS    | Other and unspecified factitious illness                                |
| 300.2      | Phobia NOS                | Phobia, unspecified                                                     |
| 300.21     | Agoraphobia w panic dis   | Agoraphobia with panic disorder                                         |
| 300.22     | Agoraphobia w/o panic     | Agoraphobia without mention of panic attacks                            |
| 300.29     | Isolated/spec phobia NEC  | Other isolated or specific phobias                                      |
| 300.3      | Obsessive-compulsive dis  | Obsessive-compulsive disorders                                          |
| 300.4      | Dysthymic disorder        | Dysthymic disorder                                                      |
| 300.5      | Neurasthenia              | Neurasthenia                                                            |
| 300.6      | Depersonalization disord  | Depersonalization disorder                                              |
| 300.7      | Hypochondriasis           | Hypochondriasis                                                         |
| 300.81     | Somatization disorder     | Somatization disorder                                                   |
| 300.82     | Undiff somatoform disrd   | Undifferentiated somatoform disorder                                    |
| 300.89     | Somatoform disorders NEC  | Other somatoform disorders                                              |
| 300.9      | Nonpsychotic disord NOS   | Unspecified nonpsychotic mental disorder                                |

**Positive symptoms of schizophrenia (i.e., hallucinations)**

| ICD-9 Code | Short Description       | Long Description                                                     |
|------------|-------------------------|----------------------------------------------------------------------|
| 780.1      | Hallucinations          |                                                                      |
| 293.81     | Psy dis w delus oth dis | Psychotic disorder with delusions in conditions classified elsewhere |
| 333.99     | Extrapyramidal dis NEC  | Other extrapyramidal diseases and abnormal movement disorders        |

**Bipolar disorders**

| ICD-9 Code | Short Description      | Long Description                                                            |
|------------|------------------------|-----------------------------------------------------------------------------|
| 296.5      | Bipol I cur depres NOS | Bipolar I disorder, most recent episode (or current) depressed, unspecified |

|        |                           |                                                                                                               |
|--------|---------------------------|---------------------------------------------------------------------------------------------------------------|
| 296.51 | Bipol I cur depress-mild  | Bipolar I disorder, most recent episode (or current) depressed, mild                                          |
| 296.52 | Bipol I cur depress-mod   | Bipolar I disorder, most recent episode (or current) depressed, moderate                                      |
| 296.53 | Bipol I curr dep w/o psy  | Bipolar I disorder, most recent episode (or current) depressed, severe, without mention of psychotic behavior |
| 296.54 | Bipol I currnt dep w psy  | Bipolar I disorder, most recent episode (or current) depressed, severe, specified as with psychotic behavior  |
| 296.55 | Bipol I cur dep rem NOS   | Bipolar I disorder, most recent episode (or current) depressed, in partial or unspecified remission           |
| 296.56 | Bipol I currnt dep remis  | Bipolar I disorder, most recent episode (or current) depressed, in full remission                             |
| 296.6  | Bipol I currnt mixed NOS  | Bipolar I disorder, most recent episode (or current) mixed, unspecified                                       |
| 296.61 | Bipol I currnt mix-mild   | Bipolar I disorder, most recent episode (or current) mixed, mild                                              |
| 296.62 | Bipol I currnt mixed-mod  | Bipolar I disorder, most recent episode (or current) mixed, moderate                                          |
| 296.63 | Bipol I cur mix w/o psy   | Bipolar I disorder, most recent episode (or current) mixed, severe, without mention of psychotic behavior     |
| 296.64 | Bipol I cur mixed w psy   | Bipolar I disorder, most recent episode (or current) mixed, severe, specified as with psychotic behavior      |
| 296.65 | Bipol I cur mix-part rem  | Bipolar I disorder, most recent episode (or current) mixed, in partial or unspecified remission               |
| 296.66 | Bipol I cur mixed remiss  | Bipolar I disorder, most recent episode (or current) mixed, in full remission                                 |
| 296.7  | Bipolar I current NOS     | Bipolar I disorder, most recent episode (or current) unspecified                                              |
| 296.8  | Bipolar disorder NOS      | Bipolar disorder, unspecified                                                                                 |
| 296    | Bipol I single manic NOS  | Bipolar I disorder, single manic episode, unspecified                                                         |
| 296.01 | Bipol I single manic-mild | Bipolar I disorder, single manic episode, mild                                                                |
| 296.02 | Bipol I single manic-mod  | Bipolar I disorder, single manic episode, moderate                                                            |
| 296.03 | Bipol I sing-sev w/o psy  | Bipolar I disorder, single manic episode, severe, without mention of psychotic behavior                       |
| 296.04 | Bipo I sin man-sev w psy  | Bipolar I disorder, single manic episode, severe, specified as with psychotic behavior                        |
| 296.05 | Bipol I sing man rem NOS  | Bipolar I disorder, single manic episode, in partial or unspecified remission                                 |
| 296.06 | Bipol I single manic rem  | Bipolar I disorder, single manic episode, in full remission                                                   |

|        |                          |                                                                                                           |
|--------|--------------------------|-----------------------------------------------------------------------------------------------------------|
| 296.4  | Bipol I currnt manic NOS | Bipolar I disorder, most recent episode (or current) manic, unspecified                                   |
| 296.41 | Bipol I curnt manic-mild | Bipolar I disorder, most recent episode (or current) manic, mild                                          |
| 296.42 | Bipol I currnt manic-mod | Bipolar I disorder, most recent episode (or current) manic, moderate                                      |
| 296.43 | Bipol I manc-sev w/o psy | Bipolar I disorder, most recent episode (or current) manic, severe, without mention of psychotic behavior |
| 296.44 | Bipol I manic-sev w psy  | Bipolar I disorder, most recent episode (or current) manic, severe, specified as with psychotic behavior  |
| 296.45 | Bipol I cur man part rem | Bipolar I disorder, most recent episode (or current) manic, in partial or unspecified remission           |
| 296.46 | Bipol I cur man full rem | Bipolar I disorder, most recent episode (or current) manic, in full remission                             |

### Substance dependence or abuse of alcohol, tobacco, and other illicit drugs

| ICD-9 Code | Short Description        | Long Description                                          |
|------------|--------------------------|-----------------------------------------------------------|
| 303.9      | Alcoh dep NEC/NOS-unspec | Other and unspecified alcohol dependence, unspecified     |
| 303.91     | Alcoh dep NEC/NOS-contin | Other and unspecified alcohol dependence, continuous      |
| 303.92     | Alcoh dep NEC/NOS-episod | Other and unspecified alcohol dependence, episodic        |
| 303.93     | Alcoh dep NEC/NOS-remiss | Other and unspecified alcohol dependence, in remission    |
| 304        | Opioid dependence-unspec | Opioid type dependence, unspecified                       |
| 304.01     | Opioid dependence-contin | Opioid type dependence, continuous                        |
| 304.02     | Opioid dependence-episod | Opioid type dependence, episodic                          |
| 304.03     | Opioid dependence-remiss | Opioid type dependence, in remission                      |
| 304.1      | Sed,hyp,anxiolyt dep-NOS | Sedative, hypnotic or anxiolytic dependence, unspecified  |
| 304.11     | Sed,hyp,anxiolyt dep-con | Sedative, hypnotic or anxiolytic dependence, continuous   |
| 304.12     | Sed,hyp,anxiolyt dep-epi | Sedative, hypnotic or anxiolytic dependence, episodic     |
| 304.13     | Sed,hyp,anxiolyt dep-rem | Sedative, hypnotic or anxiolytic dependence, in remission |
| 304.2      | Cocaine depend-unspec    | Cocaine dependence, unspecified                           |
| 304.21     | Cocaine depend-contin    | Cocaine dependence, continuous                            |
| 304.22     | Cocaine depend-episodic  | Cocaine dependence, episodic                              |
| 304.23     | Cocaine depend-remiss    | Cocaine dependence, in remission                          |
| 304.3      | Cannabis depend-unspec   | Cannabis dependence, unspecified                          |
| 304.31     | Cannabis depend-contin   | Cannabis dependence, continuous                           |
| 304.32     | Cannabis depend-episodic | Cannabis dependence, episodic                             |



|        |                          |                                                                               |
|--------|--------------------------|-------------------------------------------------------------------------------|
| 304.33 | Cannabis depend-remiss   | Cannabis dependence, in remission                                             |
| 304.4  | Amphetamin depend-unspec | Amphetamine and other psychostimulant dependence, unspecified                 |
| 304.41 | Amphetamin depend-contin | Amphetamine and other psychostimulant dependence, continuous                  |
| 304.42 | Amphetamin depend-episod | Amphetamine and other psychostimulant dependence, episodic                    |
| 304.43 | Amphetamin depend-remiss | Amphetamine and other psychostimulant dependence, in remission                |
| 304.5  | Hallucinogen dep-unspec  | Hallucinogen dependence, unspecified                                          |
| 304.51 | Hallucinogen dep-contin  | Hallucinogen dependence, continuous                                           |
| 304.52 | Hallucinogen dep-episod  | Hallucinogen dependence, episodic                                             |
| 304.53 | Hallucinogen dep-remiss  | Hallucinogen dependence, in remission                                         |
| 304.6  | Drug depend NEC-unspec   | Other specified drug dependence, unspecified                                  |
| 304.61 | Drug depend NEC-contin   | Other specified drug dependence, continuous                                   |
| 304.62 | Drug depend NEC-episodic | Other specified drug dependence, episodic                                     |
| 304.63 | Drug depend NEC-in rem   | Other specified drug dependence, in remission                                 |
| 304.7  | Opioid/other dep-unspec  | Combinations of opioid type drug with any other drug dependence, unspecified  |
| 304.71 | Opioid/other dep-contin  | Combinations of opioid type drug with any other drug dependence, continuous   |
| 304.72 | Opioid/other dep-episod  | Combinations of opioid type drug with any other drug dependence, episodic     |
| 304.73 | Opioid/other dep-remiss  | Combinations of opioid type drug with any other drug dependence, in remission |
| 304.8  | Comb drug dep NEC-unspec | Combinations of drug dependence excluding opioid type drug, unspecified       |
| 304.81 | Comb drug dep NEC-contin | Combinations of drug dependence excluding opioid type drug, continuous        |
| 304.82 | Comb drug dep NEC-episod | Combinations of drug dependence excluding opioid type drug, episodic          |
| 304.83 | Comb drug dep NEC-remiss | Combinations of drug dependence excluding opioid type drug, in remission      |
| 304.9  | Drug depend NOS-unspec   | Unspecified drug dependence, unspecified                                      |
| 304.91 | Drug depend NOS-contin   | Unspecified drug dependence, continuous                                       |
| 304.92 | Drug depend NOS-episodic | Unspecified drug dependence, episodic                                         |
| 304.93 | Drug depend NOS-remiss   | Unspecified drug dependence, in remission                                     |
| 305    | Alcohol abuse-unspec     | Alcohol abuse, unspecified                                                    |
| 305.01 | Alcohol abuse-continuous | Alcohol abuse, continuous                                                     |
| 305.02 | Alcohol abuse-episodic   | Alcohol abuse, episodic                                                       |
| 305.03 | Alcohol abuse-in remiss  | Alcohol abuse, in remission                                                   |
| 305.3  | Hallucinog abuse-unspec  | Hallucinogen abuse, unspecified                                               |
| 305.31 | Hallucinog abuse-contin  | Hallucinogen abuse, continuous                                                |
| 305.32 | Hallucinog abuse-episod  | Hallucinogen abuse, episodic                                                  |
| 305.33 | Hallucinog abuse-remiss  | Hallucinogen abuse, in remission                                              |

|        |                          |                                                                   |
|--------|--------------------------|-------------------------------------------------------------------|
| 305.4  | Sed,hyp,anxiolytc ab-NOS | Sedative, hypnotic or anxiolytic abuse, unspecified               |
| 305.41 | Sed,hyp,anxiolytc ab-con | Sedative, hypnotic or anxiolytic abuse, continuous                |
| 305.42 | Sed,hyp,anxiolytc ab-epi | Sedative, hypnotic or anxiolytic abuse, episodic                  |
| 305.43 | Sed,hyp,anxiolytc ab-rem | Sedative, hypnotic or anxiolytic abuse, in remission              |
| 305.5  | Opioid abuse-unspec      | Opioid abuse, unspecified                                         |
| 305.51 | Opioid abuse-continuous  | Opioid abuse, continuous                                          |
| 305.52 | Opioid abuse-episodic    | Opioid abuse, episodic                                            |
| 305.53 | Opioid abuse-in remiss   | Opioid abuse, in remission                                        |
| 305.6  | Cocaine abuse-unspec     | Cocaine abuse, unspecified                                        |
| 305.61 | Cocaine abuse-continuous | Cocaine abuse, continuous                                         |
| 305.62 | Cocaine abuse-episodic   | Cocaine abuse, episodic                                           |
| 305.63 | Cocaine abuse-in remiss  | Cocaine abuse, in remission                                       |
| 305.7  | Amphetamine abuse-unspec | Amphetamine or related acting sympathomimetic abuse, unspecified  |
| 305.71 | Amphetamine abuse-contin | Amphetamine or related acting sympathomimetic abuse, continuous   |
| 305.72 | Amphetamine abuse-episod | Amphetamine or related acting sympathomimetic abuse, episodic     |
| 305.73 | Amphetamine abuse-remiss | Amphetamine or related acting sympathomimetic abuse, in remission |
| 305.8  | Antidepress abuse-unspec | Antidepressant type abuse, unspecified                            |
| 305.81 | Antidepress abuse-contin | Antidepressant type abuse, continuous                             |
| 305.82 | Antidepress abuse-episod | Antidepressant type abuse, episodic                               |
| 305.83 | Antidepress abuse-remiss | Antidepressant type abuse, in remission                           |

**Cannabis abuse**

| ICD-9 Code | Short Description        | Long Description             |
|------------|--------------------------|------------------------------|
| 305.2      | Cannabis abuse-unspec    | Cannabis abuse, unspecified  |
| 305.21     | Cannabis abuse-contin    | Cannabis abuse, continuous   |
| 305.22     | Cannabis abuse-episodic  | Cannabis abuse, episodic     |
| 305.23     | Cannabis abuse-in remiss | Cannabis abuse, in remission |

**Tobacco use**

| ICD-9 Code | Short Description    | Long Description     |
|------------|----------------------|----------------------|
| 305.1      | Tobacco use disorder | Tobacco use disorder |

**Alcohol abuse**

| ICD-9 Code | Short Description        | Long Description                                      |
|------------|--------------------------|-------------------------------------------------------|
| 303.9      | Alcoh dep NEC/NOS-unspec | Other and unspecified alcohol dependence, unspecified |
| 303.91     | Alcoh dep NEC/NOS-contin | Other and unspecified alcohol dependence, continuous  |
| 303.92     | Alcoh dep NEC/NOS-episod | Other and unspecified alcohol dependence, episodic    |



|        |                          |                                                        |
|--------|--------------------------|--------------------------------------------------------|
| 303.93 | Alcoh dep NEC/NOS-remiss | Other and unspecified alcohol dependence, in remission |
|--------|--------------------------|--------------------------------------------------------|

For peer review only

**eFigure 1.** Health outcomes with substantial or moderate evidence of a statistical association with cannabis use based on the National Academy of Science (NAS) summary statement. Medical diagnoses are identified based on a significant ( $P < 0.05$ ) comparison between New York (NY) and Oklahoma (OK) (control states without cannabis legalization) with regards to the change of admission rates for such diagnoses following cannabis legalization. P values for the comparison between Colorado (CO) (site of cannabis legalization) and NY (rhomboid symbol), or between CO and OK (circular symbol) are shown as either  $< 0.05$ , or  $> 0.05$  using a gray scale for evidence of cannabis benefit (risk ratio [RR]  $< 1$  shown on the left) and cannabis harm (RR  $> 1$  shown on the right); 95% confidence intervals are shown for the comparison between CO and NY and between CO and OK as solid and dotted lines, respectively. Progressively darker shades of green or red indicate greater weight of evidence in the direction of proposed benefit versus harm, respectively, by the NAS.

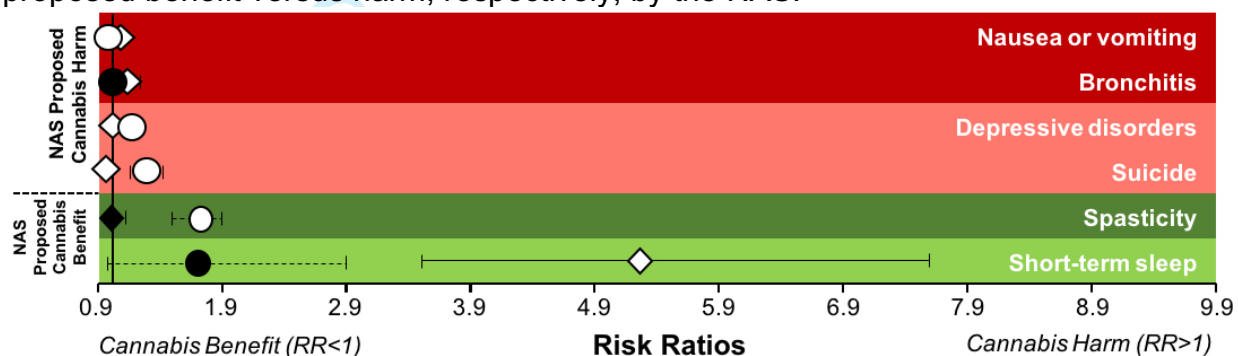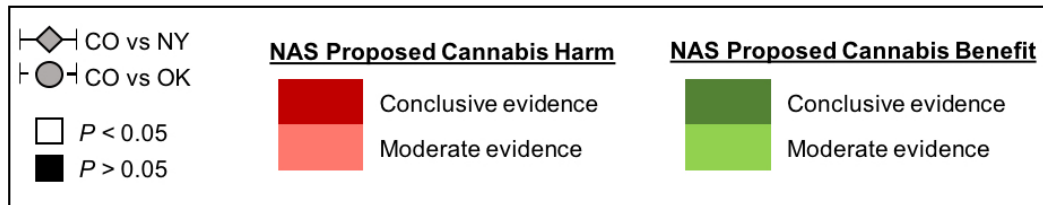

Only

**eFigure 2.** Multivariate adjusted rates of total hospital admissions over 2010-2014 in Colorado, site of implementation of the 2012 recreational cannabis legalization policy, compared with New York (A) and Oklahoma (B), control states without cannabis legalization. Red lines show the predicted rates of admissions for schizophrenia or other psychoses (and all remaining medical diagnoses plotted in eFigures 2-15) had the cannabis legalization policy not been instituted. RR = risk ratio; CI = confidence interval.

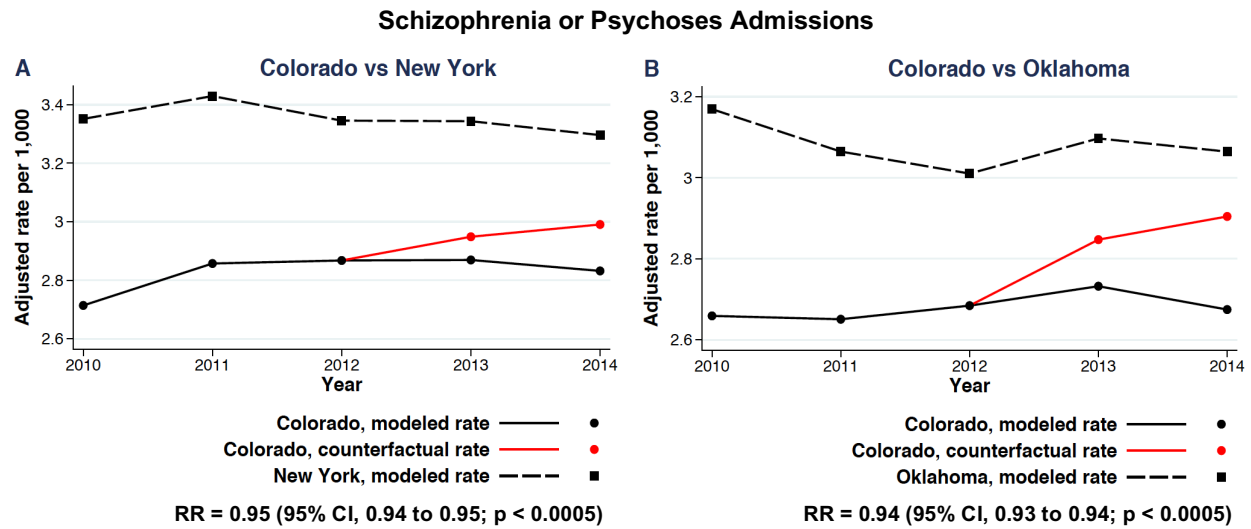

**eFigure 3.** Multivariate adjusted rates of admissions for motor vehicle accidents over 2010-2014 in Colorado compared with New York (A) and Oklahoma (B). RR = risk ratio; CI = confidence interval.

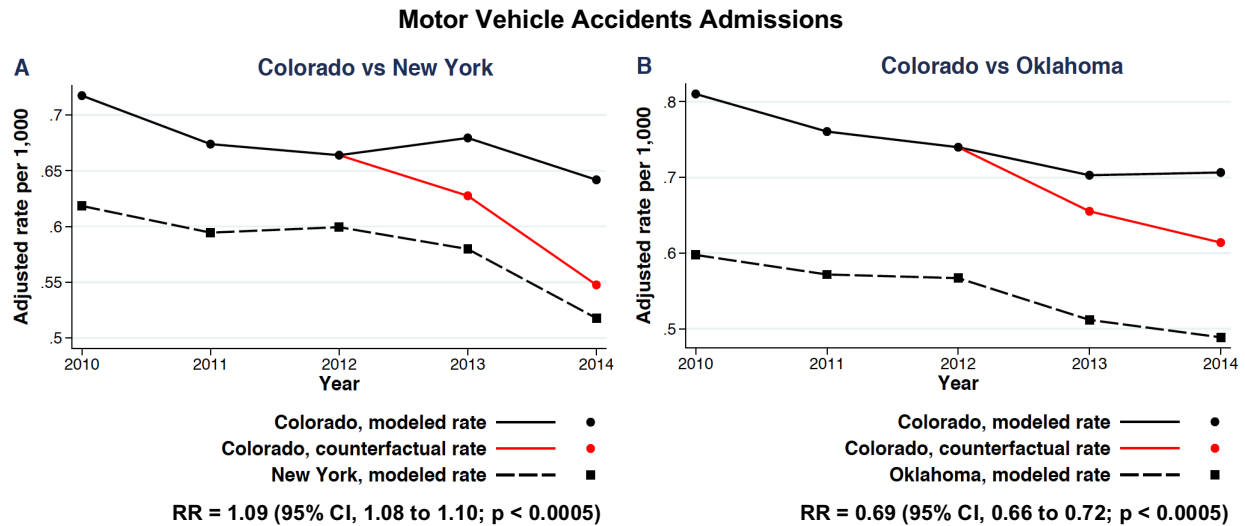

**eFigure 4.** Multivariate adjusted rates of admissions for nausea or vomiting over 2010-2014 in Colorado compared with New York (A) and Oklahoma (B). RR = risk ratio; CI = confidence interval.

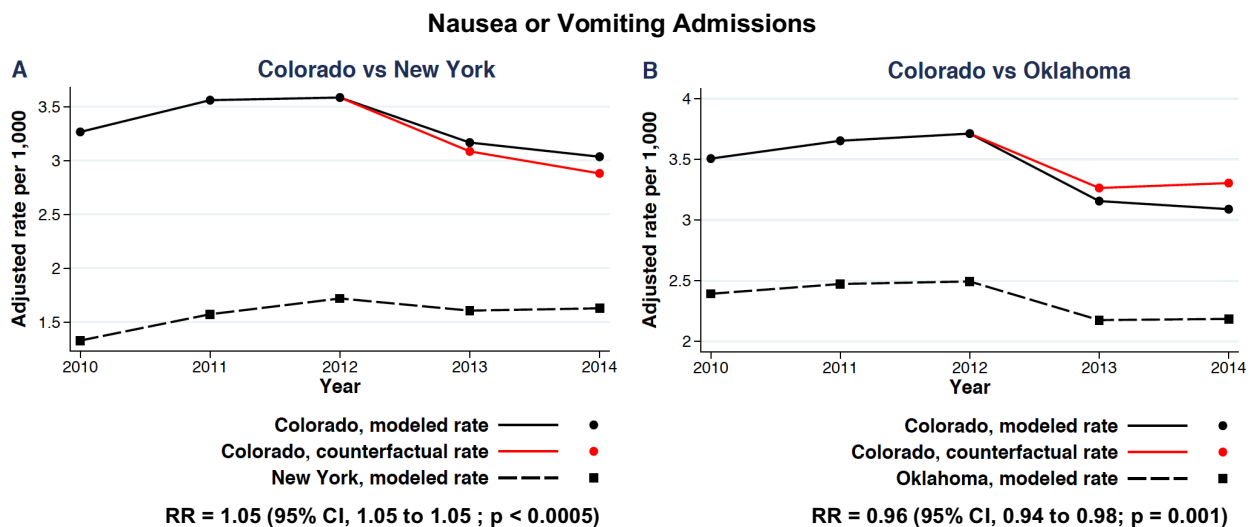

**eFigure 5.** Multivariate adjusted rates of admissions for bronchitis over 2010-2014 in Colorado compared with New York (A) and Oklahoma (B). RR = risk ratio; CI = confidence interval.

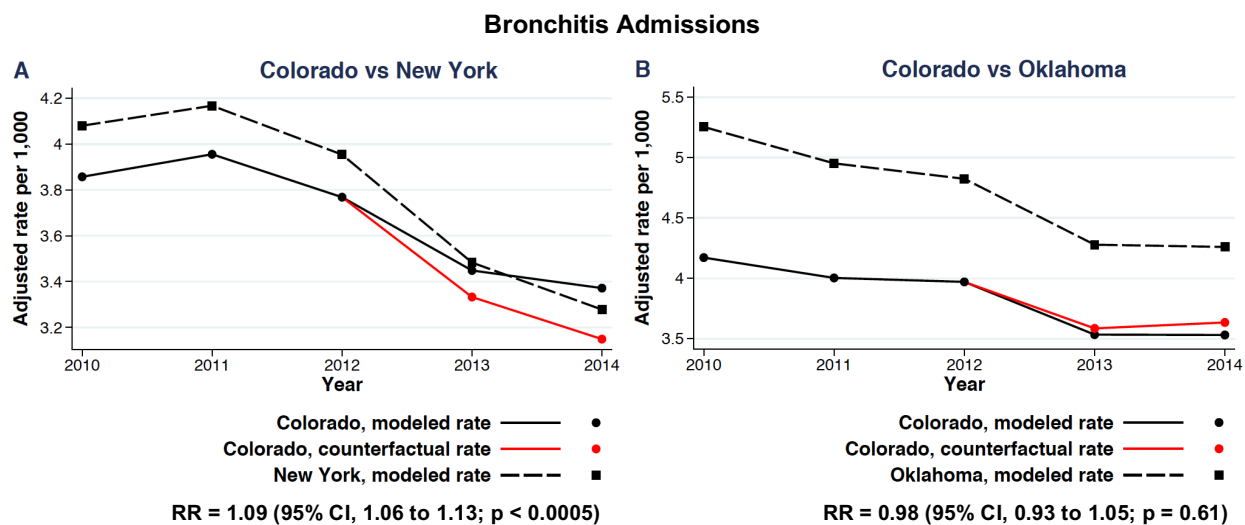

**eFigure 6.** Multivariate adjusted rates of admissions for abuse of other substances over 2010-2014 in Colorado compared with New York (A) and Oklahoma (B). RR = risk ratio; CI = confidence interval.

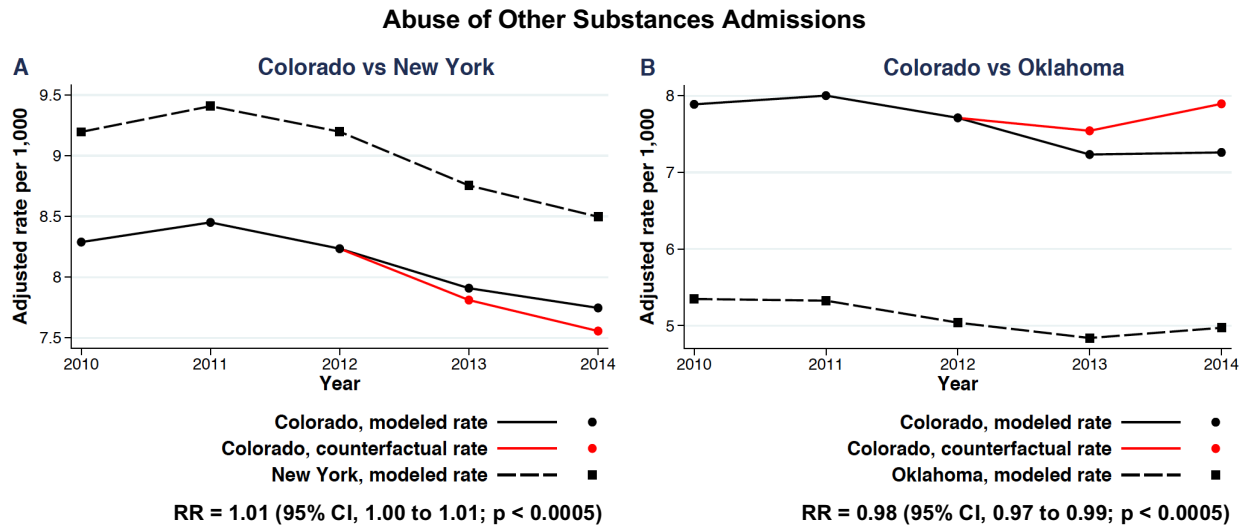

**eFigure 7.** Multivariate adjusted rates of admissions for alcohol abuse over 2010-2014 in Colorado compared with New York (A) and Oklahoma (B). RR = risk ratio; CI = confidence interval.

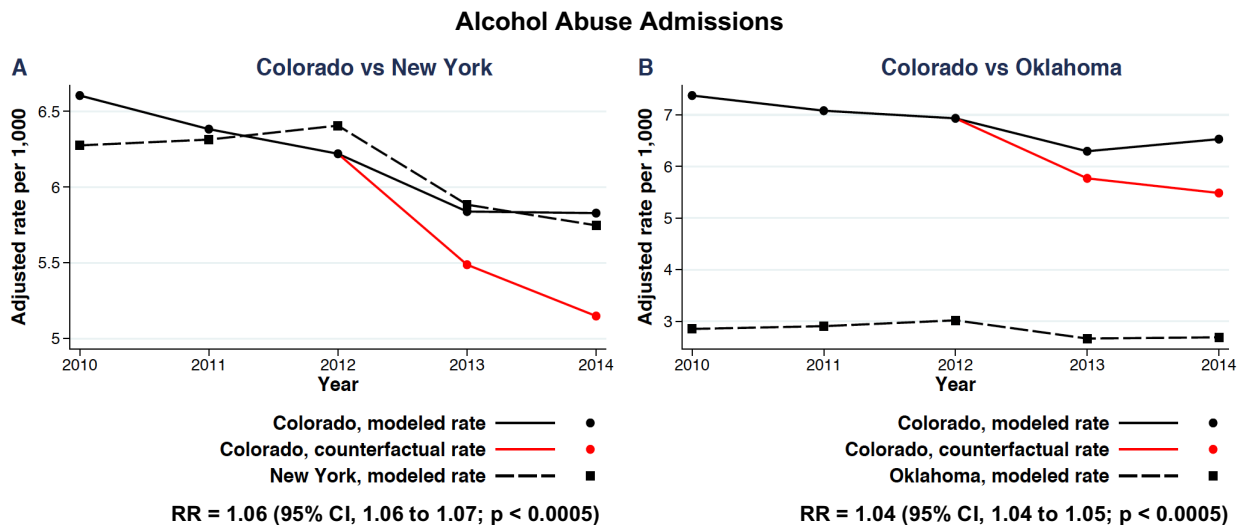

**eFigure 8.** Multivariate adjusted rates of admissions for social anxiety disorder over 2010-2014 in Colorado compared with New York (A) and Oklahoma (B). RR = risk ratio; CI = confidence interval.

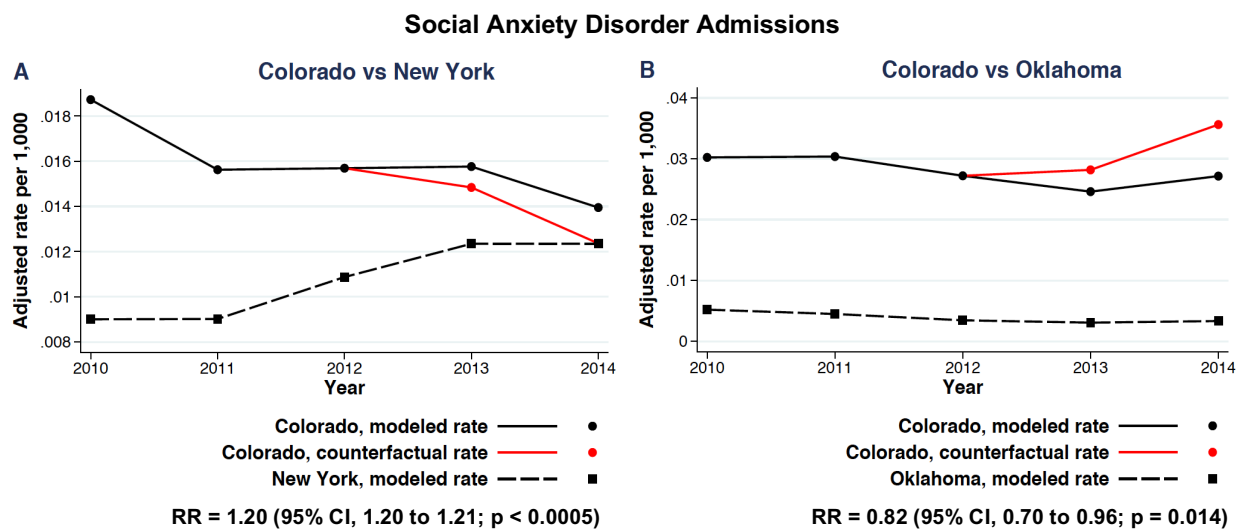

**eFigure 9.** Multivariate adjusted rates of admissions for overdose injury over 2010-2014 in Colorado compared with New York (A) and Oklahoma (B). RR = risk ratio; CI = confidence interval.

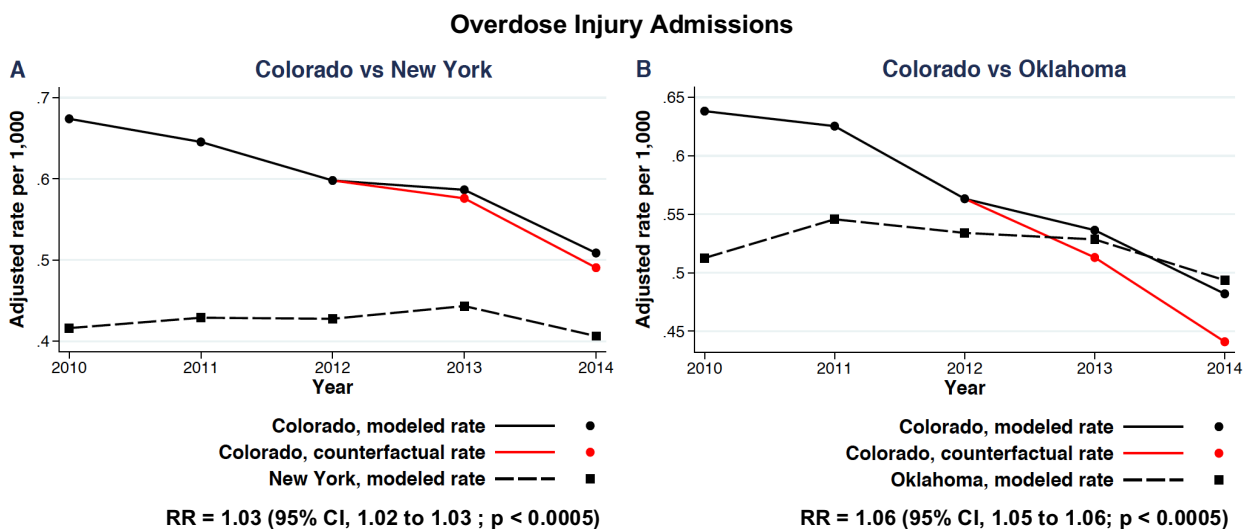

**eFigure 10.** Multivariate adjusted rates of admissions for bipolar disorders over 2010-2014 in Colorado compared with New York (A) and Oklahoma (B). RR = risk ratio; CI = confidence interval.

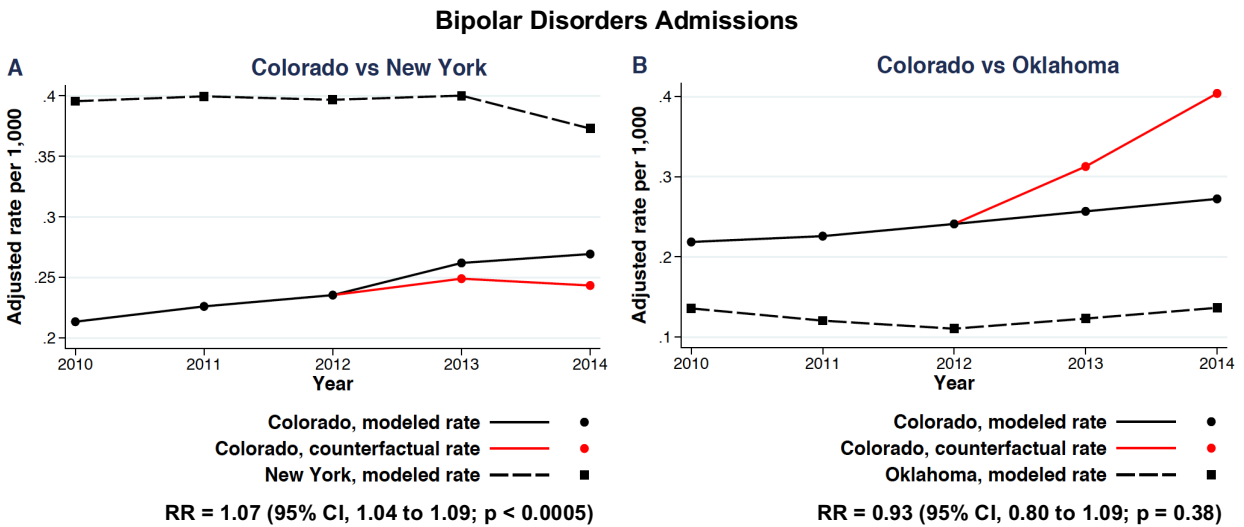

**eFigure 11.** Multivariate adjusted rates of admissions for depressive disorders over 2010-2014 in Colorado compared with New York (A) and Oklahoma (B). RR = risk ratio; CI = confidence interval.

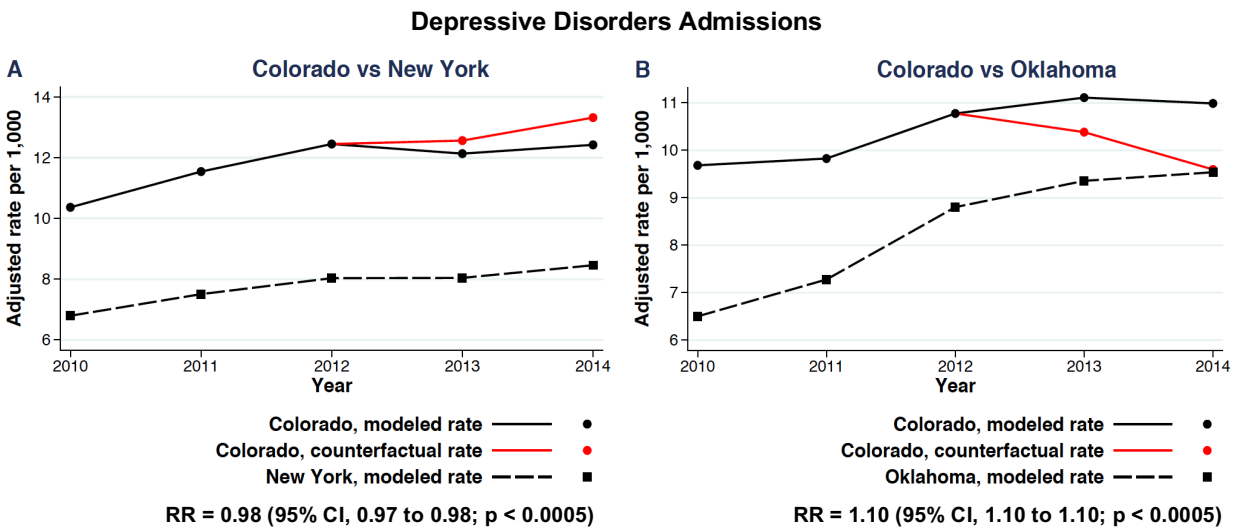

**eFigure 12.** Multivariate adjusted rates of admissions for suicide over 2010-2014 in Colorado compared with New York (A) and Oklahoma (B). RR = risk ratio; CI = confidence interval.

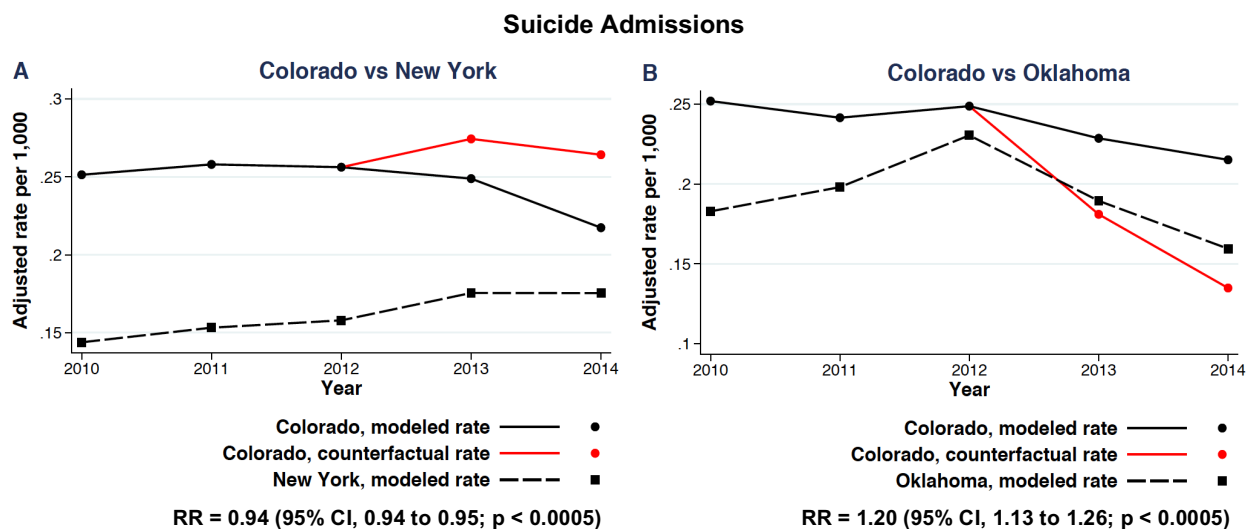

**eFigure 13.** Multivariate adjusted rates of admissions for chronic pain over 2010-2014 in Colorado compared with New York (A) and Oklahoma (B). RR = risk ratio; CI = confidence interval.

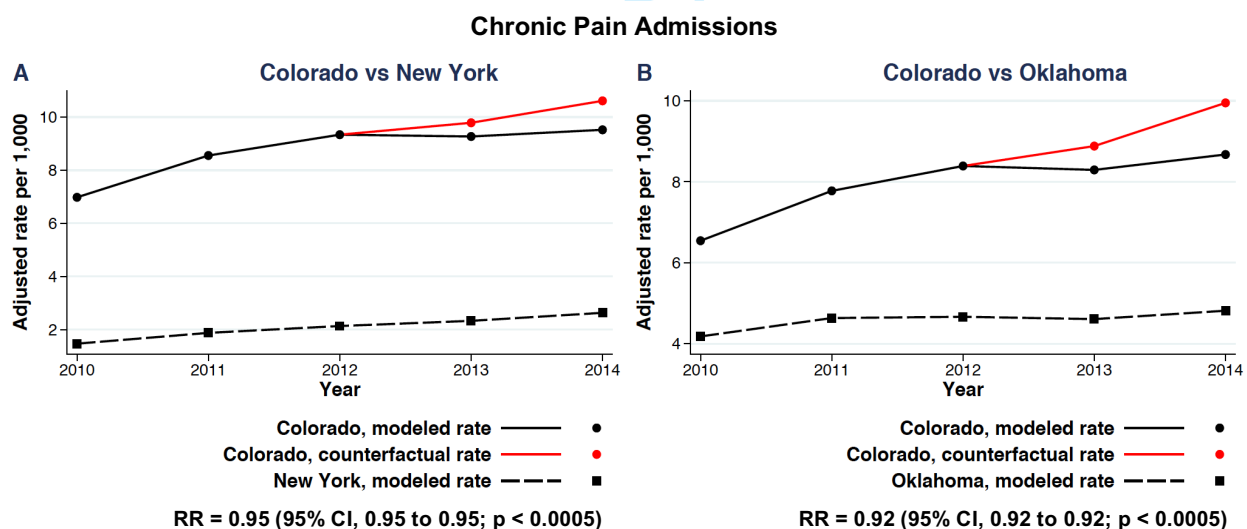



**eFigure 14.** Multivariate adjusted rates of admissions for spasticity over 2010-2014 in Colorado compared with New York (A) and Oklahoma (B). RR = risk ratio; CI = confidence interval.

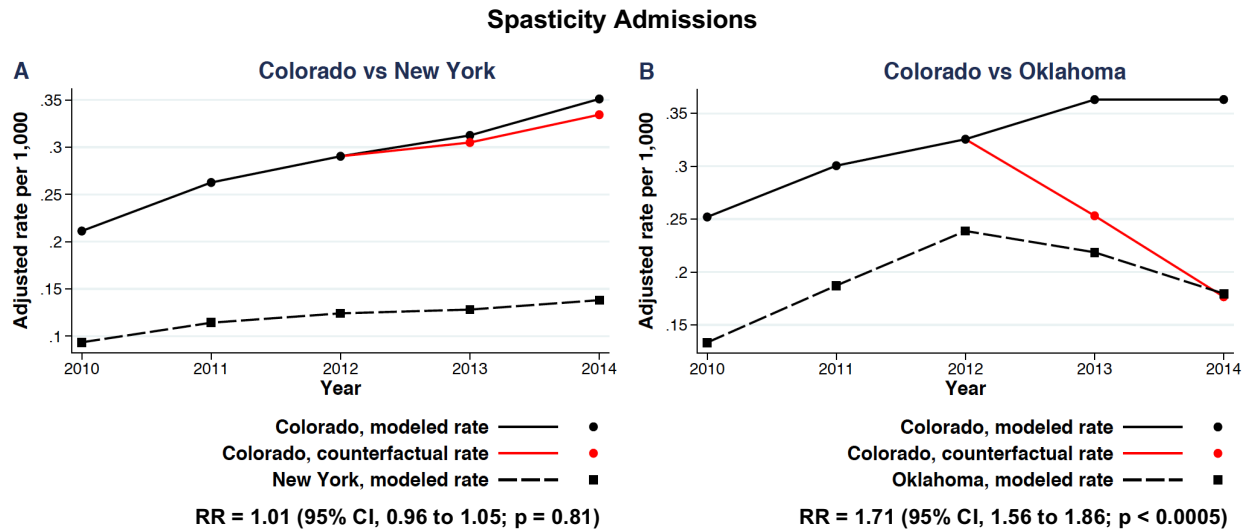

**eFigure 15.** Multivariate adjusted rates of admissions for short-term sleep disorders over 2010-2014 in Colorado compared with New York (A) and Oklahoma (B). RR = risk ratio; CI = confidence interval.

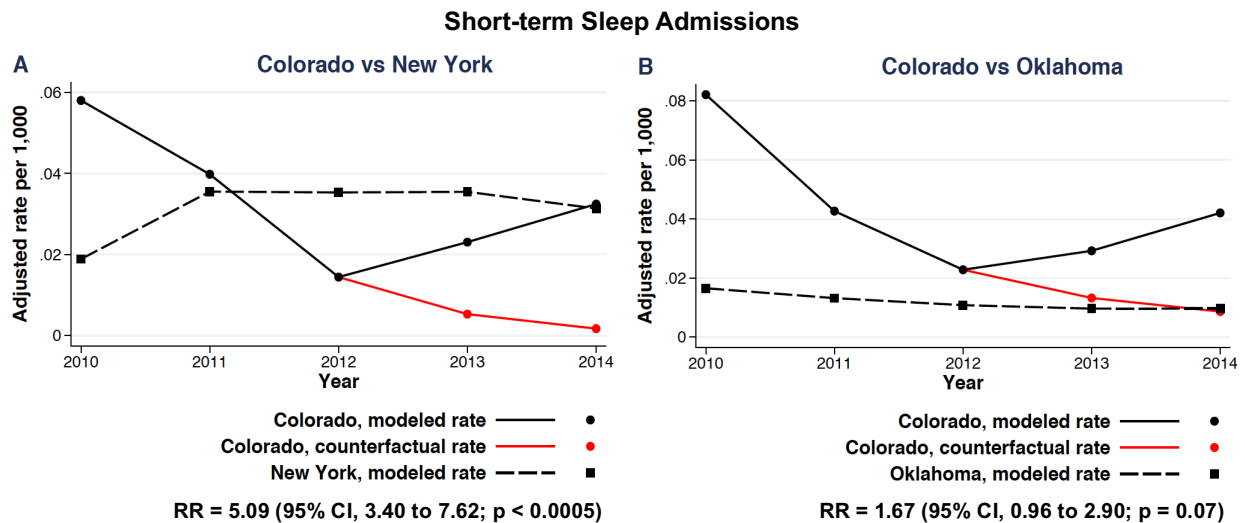

**eTable 3.** Changes in specific NAS outcomes in a sensitivity analysis using January 2014 as the date of recreational cannabis legalization

| <b>NAS Outcome</b>         | <b>State Comparisons</b> | <b>RR</b> | <b>95% CI</b> | <b>P value</b> |
|----------------------------|--------------------------|-----------|---------------|----------------|
| Motor vehicle accidents    | CO vs NY                 | 1.22      | (1.16, 1.28)  | <0.0005        |
|                            | CO vs OK                 | 1.18      | (1.02, 1.37)  | 0.026          |
|                            | NY vs OK                 | 1.04      | (0.77, 1.40)  | 0.81           |
| Overdose injury            | CO vs NY                 | 1.11      | (1.09, 1.14)  | <0.0005        |
|                            | CO vs OK                 | 1.03      | (0.98, 1.09)  | 0.25           |
|                            | NY vs OK                 | 0.98      | (0.80, 1.19)  | 0.81           |
| Bipolar disorders          | CO vs NY                 | 1.08      | (1.06, 1.09)  | <0.0005        |
|                            | CO vs OK                 | 0.81      | (0.73, 0.90)  | <0.0005        |
|                            | NY vs OK                 | 0.77      | (0.75, 0.78)  | <0.0005        |
| Depressive disorders       | CO vs NY                 | 1.01      | (0.99, 1.03)  | 0.59           |
|                            | CO vs OK                 | 1.23      | (1.20, 1.25)  | <0.0005        |
|                            | NY vs OK                 | 1.16      | (1.07, 1.26)  | <0.0005        |
| Schizophrenia or psychoses | CO vs NY                 | 0.84      | (0.82, 0.86)  | <0.0005        |
|                            | CO vs OK                 | 0.80      | (0.79, 0.80)  | <0.0005        |
|                            | NY vs OK                 | 0.88      | (0.87, 0.90)  | <0.0005        |
| Social anxiety disorder    | CO vs NY                 | 1.45      | (1.43, 1.48)  | <0.0005        |
|                            | CO vs OK                 | 0.58      | (0.47, 0.71)  | <0.0005        |
|                            | NY vs OK                 | 0.46      | (0.29, 0.74)  | 0.001          |
| Suicide                    | CO vs NY                 | 1.09      | (1.03, 1.15)  | 0.002          |
|                            | CO vs OK                 | 1.26      | (1.12, 1.41)  | <0.0005        |
|                            | NY vs OK                 | 1.11      | (1.04, 1.18)  | 0.001          |
| Bronchitis                 | CO vs NY                 | 1.19      | (1.15, 1.23)  | <0.0005        |
|                            | CO vs OK                 | 1.03      | (0.97, 1.10)  | 0.33           |
|                            | NY vs OK                 | 0.82      | (0.78, 0.87)  | <0.0005        |
| Abuse of other substances  | CO vs NY                 | 1.04      | (1.03, 1.05)  | <0.0005        |
|                            | CO vs OK                 | 0.99      | (0.97, 1.01)  | 0.45           |
|                            | NY vs OK                 | 0.94      | (0.90, 0.98)  | 0.007          |
| Nausea or vomiting         | CO vs NY                 | 1.08      | (1.06, 1.10)  | <0.0005        |
|                            | CO vs OK                 | 0.95      | (0.97, 1.01)  | <0.0005        |
|                            | NY vs OK                 | 0.89      | (0.90, 0.98)  | 0.01           |
| Chronic pain               | CO vs NY                 | 0.94      | (0.93, 0.96)  | <0.0005        |
|                            | CO vs OK                 | 0.92      | (0.91, 0.93)  | <0.0005        |
|                            | NY vs OK                 | 0.93      | (0.90, 0.96)  | <0.0005        |
| Spasticity                 | CO vs NY                 | 0.75      | (0.71, 0.79)  | <0.0005        |
|                            | CO vs OK                 | 1.56      | (1.14, 2.14)  | 0.006          |
|                            | NY vs OK                 | 2.12      | (1.64, 2.76)  | <0.0005        |
| Short-term sleep           | CO vs NY                 | 11.7      | (7.36, 18.59) | <0.0005        |
|                            | CO vs OK                 | 3.44      | (1.32, 8.99)  | 0.012          |
|                            | NY vs OK                 | 0.45      | (0.06, 3.22)  | 0.42           |

STROBE Statement—Checklist of items that should be included in reports of *cohort studies*

|                              | Item No | Recommendation                                                                                                                                                                                                                                                                                                         | Page No                        |
|------------------------------|---------|------------------------------------------------------------------------------------------------------------------------------------------------------------------------------------------------------------------------------------------------------------------------------------------------------------------------|--------------------------------|
| <b>Title and abstract</b>    | 1       | (a) Indicate the study's design with a commonly used term in the title or the abstract                                                                                                                                                                                                                                 | 1                              |
|                              |         | (b) Provide in the abstract an informative and balanced summary of what was done and what was found                                                                                                                                                                                                                    | 2                              |
| <b>Introduction</b>          |         |                                                                                                                                                                                                                                                                                                                        |                                |
| Background/rationale         | 2       | Explain the scientific background and rationale for the investigation being reported                                                                                                                                                                                                                                   | 5                              |
| Objectives                   | 3       | State specific objectives, including any prespecified hypotheses                                                                                                                                                                                                                                                       | 5                              |
| <b>Methods</b>               |         |                                                                                                                                                                                                                                                                                                                        |                                |
| Study design                 | 4       | Present key elements of study design early in the paper                                                                                                                                                                                                                                                                | 6, 7, 8                        |
| Setting                      | 5       | Describe the setting, locations, and relevant dates, including periods of recruitment, exposure, follow-up, and data collection                                                                                                                                                                                        | 6, 7, 8                        |
| Participants                 | 6       | (a) Give the eligibility criteria, and the sources and methods of selection of participants. Describe methods of follow-up<br>(b) For matched studies, give matching criteria and number of exposed and unexposed                                                                                                      | 6, 7                           |
| Variables                    | 7       | Clearly define all outcomes, exposures, predictors, potential confounders, and effect modifiers. Give diagnostic criteria, if applicable                                                                                                                                                                               | 6, 7, 8                        |
| Data sources/<br>measurement | 8*      | For each variable of interest, give sources of data and details of methods of assessment (measurement). Describe comparability of assessment methods if there is more than one group                                                                                                                                   | 6, 7, 8                        |
| Bias                         | 9       | Describe any efforts to address potential sources of bias                                                                                                                                                                                                                                                              | 7, 8                           |
| Study size                   | 10      | Explain how the study size was arrived at                                                                                                                                                                                                                                                                              | 6, 7                           |
| Quantitative variables       | 11      | Explain how quantitative variables were handled in the analyses. If applicable, describe which groupings were chosen and why                                                                                                                                                                                           | 7, 8                           |
| Statistical methods          | 12      | (a) Describe all statistical methods, including those used to control for confounding<br>(b) Describe any methods used to examine subgroups and interactions<br>(c) Explain how missing data were addressed<br>(d) If applicable, explain how loss to follow-up was addressed<br>(e) Describe any sensitivity analyses | 9, 10<br><br>6, 7<br><br>8, 10 |
| <b>Results</b>               |         |                                                                                                                                                                                                                                                                                                                        |                                |
| Participants                 | 13*     | (a) Report numbers of individuals at each stage of study—eg numbers potentially eligible, examined for eligibility, confirmed eligible, included in the study, completing follow-up, and analysed<br>(b) Give reasons for non-participation at each stage<br>(c) Consider use of a flow diagram                        | 11                             |
| Descriptive data             | 14*     | (a) Give characteristics of study participants (eg demographic, clinical, social) and information on exposures and potential confounders<br>(b) Indicate number of participants with missing data for each variable of interest<br>(c) Summarise follow-up time (eg, average and total amount)                         | 11, 12, 13                     |
| Outcome data                 | 15*     | Report numbers of outcome events or summary measures over time                                                                                                                                                                                                                                                         | 13, 14                         |

|    |                          |    |                                                                                                                                                                                                              |        |
|----|--------------------------|----|--------------------------------------------------------------------------------------------------------------------------------------------------------------------------------------------------------------|--------|
| 1  | Main results             | 16 | (a) Give unadjusted estimates and, if applicable, confounder-adjusted estimates and their precision (eg, 95% confidence interval). Make clear which confounders were adjusted for and why they were included | 11-14  |
| 2  |                          |    | (b) Report category boundaries when continuous variables were categorized                                                                                                                                    |        |
| 3  |                          |    | (c) If relevant, consider translating estimates of relative risk into absolute risk for a meaningful time period                                                                                             |        |
| 4  |                          |    |                                                                                                                                                                                                              |        |
| 5  |                          |    |                                                                                                                                                                                                              |        |
| 6  |                          |    |                                                                                                                                                                                                              |        |
| 7  |                          |    |                                                                                                                                                                                                              |        |
| 8  |                          |    |                                                                                                                                                                                                              |        |
| 9  | Other analyses           | 17 | Report other analyses done—eg analyses of subgroups and interactions, and sensitivity analyses                                                                                                               | 12, 14 |
| 10 |                          |    |                                                                                                                                                                                                              |        |
| 11 | <b>Discussion</b>        |    |                                                                                                                                                                                                              |        |
| 12 |                          |    |                                                                                                                                                                                                              |        |
| 13 | Key results              | 18 | Summarise key results with reference to study objectives                                                                                                                                                     | 14-16  |
| 14 |                          |    |                                                                                                                                                                                                              |        |
| 15 | Limitations              | 19 | Discuss limitations of the study, taking into account sources of potential bias or imprecision. Discuss both direction and magnitude of any potential bias                                                   | 16-19  |
| 16 |                          |    |                                                                                                                                                                                                              |        |
| 17 | Interpretation           | 20 | Give a cautious overall interpretation of results considering objectives, limitations, multiplicity of analyses, results from similar studies, and other relevant evidence                                   | 14-19  |
| 18 |                          |    |                                                                                                                                                                                                              |        |
| 19 |                          |    |                                                                                                                                                                                                              |        |
| 20 | Generalisability         | 21 | Discuss the generalisability (external validity) of the study results                                                                                                                                        | 19     |
| 21 |                          |    |                                                                                                                                                                                                              |        |
| 22 | <b>Other information</b> |    |                                                                                                                                                                                                              |        |
| 23 | Funding                  | 22 | Give the source of funding and the role of the funders for the present study and, if applicable, for the original study on which the present article is based                                                | 20     |
| 24 |                          |    |                                                                                                                                                                                                              |        |

25  
26  
27 \*Give information separately for exposed and unexposed groups.

28  
29 **Note:** An Explanation and Elaboration article discusses each checklist item and gives methodological background and published examples of transparent reporting. The STROBE checklist is best used in conjunction with this article (freely available on the Web sites of PLoS Medicine at <http://www.plosmedicine.org/>, Annals of Internal Medicine at <http://www.annals.org/>, and Epidemiology at <http://www.epidem.com/>). Information on the STROBE Initiative is available at <http://www.strobe-statement.org>.

30  
31  
32  
33  
34  
35  
36  
37  
38  
39  
40  
41  
42  
43  
44  
45  
46  
47  
48  
49  
50  
51  
52  
53  
54  
55  
56  
57  
58  
59  
60

# BMJ Open

## Does Cannabis Legalization Change Healthcare Utilization? A Population-based Study Using the Healthcare Cost and Utilization Project in Colorado, USA

|                                 |                                                                                                                                                                                                                                                                                                                                                                                                                                                                                                                                                                                                                                                                                                                                                           |
|---------------------------------|-----------------------------------------------------------------------------------------------------------------------------------------------------------------------------------------------------------------------------------------------------------------------------------------------------------------------------------------------------------------------------------------------------------------------------------------------------------------------------------------------------------------------------------------------------------------------------------------------------------------------------------------------------------------------------------------------------------------------------------------------------------|
| Journal:                        | <i>BMJ Open</i>                                                                                                                                                                                                                                                                                                                                                                                                                                                                                                                                                                                                                                                                                                                                           |
| Manuscript ID                   | bmjopen-2018-027432.R2                                                                                                                                                                                                                                                                                                                                                                                                                                                                                                                                                                                                                                                                                                                                    |
| Article Type:                   | Research                                                                                                                                                                                                                                                                                                                                                                                                                                                                                                                                                                                                                                                                                                                                                  |
| Date Submitted by the Author:   | 23-Mar-2019                                                                                                                                                                                                                                                                                                                                                                                                                                                                                                                                                                                                                                                                                                                                               |
| Complete List of Authors:       | Delling, Francesca; University of California, San Francisco<br>Vittinghoff, Eric; University of California, San Francisco,<br>Dewland, Thomas; Oregon Health & Science University, Medicine<br>Pletcher, Mark; University of California, San Francisco, Epidemiology and<br>Biostatistics<br>Olgin, J; University of California San Francisco<br>Nah, Gregory; University of California San Francisco<br>Aschbacher, Kirstin; University of California, San Francisco<br>Fang, Christina; University of California, San Francisco<br>Lee, Emily; University of California, San Francisco<br>Fan, Shannon; University of California, San Francisco<br>Kazi, Dhruv; University of California San Francisco, Medicine (Cardiology)<br>Marcus, Gregory; UCSF, |
| <b>Primary Subject Heading</b>: | Epidemiology                                                                                                                                                                                                                                                                                                                                                                                                                                                                                                                                                                                                                                                                                                                                              |
| Secondary Subject Heading:      | Public health                                                                                                                                                                                                                                                                                                                                                                                                                                                                                                                                                                                                                                                                                                                                             |
| Keywords:                       | Healthcare utilization, Health policy < HEALTH SERVICES<br>ADMINISTRATION & MANAGEMENT, Cannabis legalization                                                                                                                                                                                                                                                                                                                                                                                                                                                                                                                                                                                                                                             |
|                                 |                                                                                                                                                                                                                                                                                                                                                                                                                                                                                                                                                                                                                                                                                                                                                           |

SCHOLARONE™  
Manuscripts

1  
2  
3 1 **Does Cannabis Legalization Change Healthcare Utilization? A Population-based**  
4  
5 2 **Study Using the Healthcare Cost and Utilization Project in Colorado, USA**  
6  
7  
8 3

9  
10 4 Francesca N. Delling, MD, MPH;<sup>1</sup> Eric Vittinghoff, PhD;<sup>1</sup> Thomas A. Dewland, MD;<sup>2</sup>  
11  
12 5 Mark J. Pletcher, MD, MPH;<sup>1</sup> Jeffrey E. Olgin, MD;<sup>1</sup> Gregory Nah, MA;<sup>1</sup> Kirstin  
13  
14 6 Aschbacher, PhD;<sup>1</sup> Christina D. Fang, BA;<sup>1</sup> Emily S. Lee, BA;<sup>1</sup> Shannon M. Fan, BA;<sup>1</sup>  
15  
16 7 Dhruv S. Kazi, MD, MS;<sup>1</sup> and Gregory M. Marcus, MD, MAS.<sup>1</sup>  
17  
18

19 8 <sup>1</sup>Department of Medicine, Division of Cardiology, University of California, San Francisco,  
20  
21 San Francisco, CA, USA  
22  
23

24 10 <sup>2</sup>Knight Cardiovascular Institute, Oregon Health & Science University, Portland, OR,  
25  
26 11 USA  
27  
28  
29  
30

31 13 **Corresponding Author:** Gregory M. Marcus, MD, MAS, Division of Cardiology,  
32  
33 14 University of California, San Francisco, 505 Parnassus Avenue, Room M1180B, San  
34  
35 15 Francisco, CA 94117 ([marcusg@medicine.ucsf.edu](mailto:marcusg@medicine.ucsf.edu)).  
36  
37  
38  
39

40 17 The Corresponding Author has the right to grant on behalf of all authors and does grant  
41  
42 18 on behalf of all authors, an exclusive license (or non-exclusive for government  
43  
44 19 employees) on a worldwide basis to the BMJ Publishing Group Ltd to permit this article  
45  
46 20 (if accepted) to be published in BMJ editions and any other BMJ PGL products and  
47  
48 21 sublicenses such use and exploit all subsidiary rights, as set out in our license.  
49  
50  
51  
52

53  
54 23 **Total Word Count:** 3939  
55  
56  
57  
58  
59  
60

1  
2  
3 25 **ABSTRACT**  
4

5 26 **OBJECTIVE:** To assess the effect of cannabis legalization on health effects and healthcare  
6  
7 27 utilization in Colorado (CO), the first state to legalize recreational cannabis, when compared  
8  
9 28 with 2 control states, New York (NY) and Oklahoma (OK).  
10

11  
12 29 **DESIGN:** We used the 2010-2014 Healthcare Cost and Utilization Project (HCUP) inpatient  
13  
14 30 databases to compare changes in rates of healthcare utilization and diagnoses in CO versus NY  
15  
16 31 and OK.  
17

18  
19 32 **SETTING:** Population-based, inpatient.  
20

21  
22 33 **PARTICIPANTS:** HCUP state-wide data comprising over 28 million individuals and over 16  
23  
24 34 million hospitalizations across 3 states.  
25

26 35 **MAIN OUTCOME MEASURES:** We used International Classification of Diseases-9<sup>th</sup> Edition  
27  
28 36 (ICD-9) codes to assess changes in healthcare utilization specific to various medical diagnoses  
29  
30 37 potentially treated by or exacerbated by cannabis. Diagnoses were classified based on weight  
31  
32 38 of evidence from the National Academy of Science (NAS). Negative binomial models were used  
33  
34 39 to compare rates of admissions between states.  
35  
36

37 40 **RESULTS:** In CO compared to NY and OK, respectively, cannabis abuse hospitalizations  
38  
39 41 increased (risk ratio [RR], 1.27; 95% confidence interval [CI], 1.26 to 1.28 and RR 1.16; 95% CI  
40  
41 42 1.15 to 1.17; both  $P<0.0005$ ) post-legalization. In CO, there was a reduction in total admissions  
42  
43 43 but only when compared to OK (RR 0.97; 95% CI 0.96 to 0.98;  $P<0.0005$ ). Length of stay and  
44  
45 44 costs did not change significantly in CO compared to NY or OK. Post-legalization changes most  
46  
47 45 consistent with NAS included an increase in motor vehicle accidents, alcohol abuse, overdose  
48  
49 46 injury, and a reduction in chronic pain admissions (all  $P<0.05$  compared to each control state).  
50  
51

52  
53 47 **CONCLUSIONS:** Recreational cannabis legalization is associated with neutral effects on  
54  
55 48 healthcare utilization. In line with previous evidence, cannabis liberalization is linked to an  
56  
57

1  
2  
3  
4  
5  
6  
7  
8  
9  
10  
11  
12  
13  
14  
15  
16  
17  
18  
19  
20  
21  
22  
23  
24  
25  
26  
27  
28  
29  
30  
31  
32  
33  
34  
35  
36  
37  
38  
39  
40  
41  
42  
43  
44  
45  
46  
47  
48  
49  
50  
51  
52  
53  
54  
55  
56  
57  
58  
59  
60

49 increase in motor vehicle accidents, alcohol abuse, overdose injuries and a decrease in chronic  
50 pain admissions. Such population-level effects may help guide future decisions regarding  
51 cannabis use, prescription, and policy.

For peer review only



### 53 **Strengths and limitations of this study**

- 54 • The study focuses on the impact of recreational cannabis legalization on hospital  
55 admissions instead of its legal or societal effects
- 56 • This study utilizes state-wide hospital admission data comprising over 28 million  
57 individuals and over 16 million hospitalizations
- 58 • Effects on hospital admissions are evaluated in Colorado, the first state to legalize  
59 recreational cannabis, but compared with only 2 control states, New York and  
60 Oklahoma
- 61 • Follow up data after recreational cannabis legalization only includes 2  
62 subsequent years
- 63 • Physician coding with ICD-9 codes does not capture potentially important  
64 mediators related to cannabis use

## 65 INTRODUCTION

66 Over 147 million people, or 2.5 percent of the world's population, use cannabis  
67 (marijuana),<sup>1</sup> and more than 20 million Americans have reported the use of cannabis in  
68 the past 30 days.<sup>1</sup> Because cannabis use is a federal crime, clinical studies have been  
69 challenging to pursue, resulting in substantial knowledge gaps regarding actual health  
70 consequences. Thirty-three states and the District of Columbia now allow cannabis for  
71 the treatment of medical conditions.<sup>2</sup> Of these, 9 have recently legalized cannabis for  
72 recreational use. Given such pervasive policy changes, understanding potential shifts in  
73 healthcare utilization is vital.

74 Recently, an extensive and rigorous summary of the current evidence on health  
75 effects of cannabis was developed by a committee of experts appointed by the US  
76 National Academy of Science (NAS) focusing on systematic reviews and high-quality  
77 primary research.<sup>3</sup> The health endpoints assessed in the NAS summary included  
78 oncologic, cardiometabolic, respiratory, immunologic, and psychiatric disorders as well  
79 as outcomes related to injury and death (i.e. motor-vehicle accidents). While the NAS  
80 summary represents a valuable starting place that makes use of the available data, we  
81 do not yet know whether that evidence, based largely on small studies, will translate into  
82 real-world ramifications after legalization of recreational cannabis.

83 On December 10, 2012, Colorado enacted *Colorado Amendment 64*, legalizing  
84 recreational cannabis. Following this date, adults aged 21 or older could grow cannabis  
85 plants privately, legally possess all cannabis from these plants, and give cannabis as a  
86 gift to other adults aged 21 or older.<sup>4</sup> After January 1, 2014, recreational cannabis could  
87 be legally purchased in retail stores.<sup>5</sup> We hypothesized that changes in healthcare

1  
2  
3 88 utilization and diagnoses most consistent with NAS-based evidence occur when access  
4  
5 89 to recreational cannabis becomes liberalized.  
6  
7  
8 90

## 91 **METHODS**

92 We used the Agency for Healthcare Research and Quality (AHRQ)-funded Healthcare  
93 Cost and Utilization Project (HCUP) database to measure inpatient healthcare utilization  
94 and diagnoses in Colorado (CO) between 2010 and 2014. HCUP is a state-wide  
95 database containing all listed inpatient diagnoses and procedures, discharge status,  
96 patient demographics, and charges for all patients, regardless of payer (e.g., Medicare,  
97 Medicaid, private insurance, uninsured).

98 Comparisons were made with 2 control states in order to address possible secular  
99 trends. New York (NY), the most populous state with inpatient HCUP data available up  
100 to 2014 was selected, and, to counter this coastal and largely urban state, we also  
101 selected Oklahoma (OK), a predominately rural state directly adjacent to CO with HCUP  
102 hospitalization data up to 2014. We used separate HCUP databases for CO, NY and  
103 OK. Unlike the National Inpatient Sample (NIS), which is (by definition) a sample, these  
104 state-specific databases include data from every actual admission, providing direct and  
105 complete information regarding all healthcare utilization. Both primary and secondary  
106 diagnoses were extracted from each HCUP database for each admission used: up to 30  
107 ICD-9 codes in CO, 25 in NY, and 16 in OK were provided for each encounter. Annual  
108 demographic data, including age, sex, and race, was obtained from the United States  
109 Census Bureau. Only month and year were available in all HCUP databases; as  
110 legalization took effect on December 10, 2012, hospitalizations following December,

1  
2  
3 111 2012 were considered “after” enactment of the law. Patients with missing information on  
4  
5 112 age, sex, race, and year of encounter were excluded.

6  
7 113 Age, sex, race, income level, and insurance payer were recorded at each  
8  
9 114 healthcare encounter. Hispanic ethnicity was not coded in the OK State Department of  
10  
11 115 Health data source. In order to use comparable categorizations across the 3 states, we  
12  
13 116 separated race into white, black, Native American, and other. In addition to the  
14  
15 117 population-level variables age, sex and race, we obtained the following covariates at the  
16  
17 118 individual level for each age, sex and race population strata: 1) income level 2)  
18  
19 119 proportion of HCUP individuals living in an urban versus rural setting, 3) with a  
20  
21 120 diagnosis of tobacco use, 4) alcohol abuse, and 5) psychiatric disorders. The latter 3  
22  
23 121 covariates were available from ICD-9 codes. Income level was categorized by quartiles  
24  
25 122 using the median household income for each patient’s ZIP code. Income level was not  
26  
27 123 available for OK.

28  
29 124 We first performed a validation analysis to assess changes in cannabis abuse  
30  
31 125 diagnoses in CO after versus before recreational cannabis legalization and compared  
32  
33 126 those rates to changes in NY and OK over the same time period. To determine changes  
34  
35 127 in overall healthcare utilization, we assessed changes in total number of  
36  
37 128 hospitalizations, length of inpatient stay, and healthcare costs. We estimated the cost of  
38  
39 129 each hospitalization by multiplying the charges by a cost-to-charge ratio for the  
40  
41 130 admitting hospital for the given year. For NY and CO, we used the all-payer cost-to-  
42  
43 131 charge ratios provided by HCUP. When the all-payer cost-to-charge ratio was missing,  
44  
45 132 we applied the average cost-to-charge ratio particular to state and year. As HCUP does  
46  
47 133 not provide cost-to-charge ratios for OK, we assumed a constant state-wide cost-to-  
48  
49  
50  
51  
52  
53  
54  
55  
56  
57  
58  
59  
60

1  
2  
3 134 charge ratio (0.3119 as derived from the Institute for Health and Socio-Economic Policy  
4  
5 135 calculations of federal cost reports) to estimate healthcare costs in OK;<sup>6</sup> we then  
6  
7 136 conducted a sensitivity analysis setting the cost-to-charge ratio for OK to equal to the  
8  
9 137 average for NY and CO for the corresponding year. See online supplementary  
10  
11 138 eMethods and eTable 1 for additional details.

12  
13  
14 139 We used International Classification of Diseases-9<sup>th</sup> Edition (ICD-9) codes  
15  
16 140 (eTable 2) to assess changes in healthcare utilization specific to various medical  
17  
18 141 diagnoses potentially treated by or exacerbated by cannabis use as identified by the  
19  
20 142 NAS summary. For each health endpoint of interest in the NAS review, the weight of  
21  
22 143 evidence regarding the statistical association of recreational cannabis with a specific  
23  
24 144 health endpoint or the therapeutic use of cannabis had previously been categorized into  
25  
26 145 substantial, moderate, limited or no evidence.<sup>3</sup> We opted to focus on NAS health  
27  
28 146 endpoints with either substantial or moderate evidence.

29  
30  
31 147 Because diagnoses of alcohol or other substance abuse “in remission” may have  
32  
33 148 been incidental and not directly responsible for the hospitalization, we performed a  
34  
35 149 sensitivity analysis where we removed “in remission” diagnoses from the group of ICD-9  
36  
37 150 codes defining alcohol abuse and other substance abuse (eTable 2).

38  
39  
40 151 Finally, to take into account the additional effect of recreational cannabis related  
41  
42 152 to availability in retail stores we performed sensitivity analyses for all health care  
43  
44 153 utilization (total number of admissions, length of stay, costs) and NAS-evidence based  
45  
46 154 outcomes investigations utilizing January 1, 2014 as the change of policy date.

47  
48  
49 155 Certification to use de-identified HCUP data was obtained from the University of  
50  
51 156 California, San Francisco Committee on Human Research.

157

**158 Statistical Analysis**

159 Demographic and lifestyle characteristics are presented as mean  $\pm$  standard deviation  
160 (SD) or n (% of total admissions) and were compared between states using linear,  
161 logistic, and multinomial models as appropriate. Rates of admissions for NAS diagnoses  
162 (with the population size as the denominator) were compared between states using  
163 negative binomial models.

164 To assess the effects of recreational cannabis legalization, we used negative  
165 binomial models for the number of admissions, both overall and for particular  
166 diagnoses, with the log of the subgroup population sizes as an offset and the use of  
167 robust standard errors. Analogous linear models were utilized for length of stay and  
168 cost, which were both log-transformed in order to meet normality assumptions. All  
169 models were adjusted for age, race, sex, income level, urbanicity, diagnosis of alcohol  
170 abuse, tobacco use and psychiatric disorders. Adjustment for diagnosis of psychiatric  
171 disorders was not performed in the presence of a psychiatric outcome. In order to relax  
172 the linearity assumption, each 5-year age range was included as a separate category.  
173 To flexibly model secular patterns, year was included as a categorical rather than  
174 continuous variable (with a category for each year between 2010 and 2014). The crucial  
175 predictors in our model included an indicator for CO (versus the comparison state) and  
176 interactions of this indicator with 2 continuous linear spline basis functions, year-2012,  
177 and max (0, year-2012). The main effect for CO estimated the between-state risk ratio  
178 (RR) in 2012, the first interaction estimated the slope of the between-state RR in 2010-  
179 12, and the second estimated the change in slope after 2012. The first interaction was

1  
2  
3 180 used to project the counterfactual 2013-2014 rates in CO that would be expected in the  
4  
5 181 absence of legalization, while the second was used to capture the legalization effect.  
6  
7 182 Like a standard interrupted time series (ITS) model, our model assumed that the  
8  
9 183 between-state RR changed linearly at different rates before and after the intervention,  
10  
11 184 but used the categorical indicator for year to relax the standard ITS assumption of  
12  
13 185 piecewise linear trends in the underlying state-specific rates, substantially improving  
14  
15 186 model fit. The same model was used in the sensitivity analysis using January 1, 2014  
16  
17 187 (date of legal retail cannabis sales) as change of policy date.  
18  
19  
20

21  
22 188 A 2-tailed  $P < 0.05$  was considered statistically significant for the validation  
23  
24 189 analysis (cannabis use), and analyses related to overall healthcare utilization. In order  
25  
26 190 to minimize false positive results and to account for secular trends that might differ  
27  
28 191 across different populations, we assessed for validation in comparisons versus NY and  
29  
30 192 then OK separately.  
31  
32

33 193 In order to address possible false positives due to multiple hypotheses testing in  
34  
35 194 assessing the diagnoses with moderate or substantial evidence described in the NAS  
36  
37 195 document, we employed stringent standards: to be considered “positive,” the  
38  
39 196 comparisons between CO and *each* of the other 2 states needed to be in the direction  
40  
41 197 expected from the NAS report, each exhibiting statistical significance using a two-tailed  
42  
43 198 alpha of 0.05. A “positive” designation also required absence of a statistically significant  
44  
45 199 difference between NY versus OK using a two-tailed alpha of 0.05. All analyses were  
46  
47 200 performed using Stata 15 (StataCorp, College Station, TX).  
48  
49  
50

51  
52 201

## 53 54 202 **Patient and Public Involvement**

55  
56  
57  
58  
59  
60

1  
2  
3 203 The patients and public were not involved in the study.  
4  
5  
6 204

## 7 8 205 **RESULTS**

### 9 10 206 **Baseline Characteristics**

11  
12 207 The total number of admissions between 2010 and 2014 are shown for each state in  
13  
14 208 **table 1**. Patients in CO were generally younger, more commonly female, and less  
15  
16 209 ethnically diverse. Wealth in CO was less equally distributed, with a higher proportion of  
17  
18 210 individuals with lower income in CO compared to NY. Finally, admission rates were  
19  
20 211 lower in CO than the control states for most NAS diagnoses, with exceptions for pre-  
21  
22 212 diabetes and post-traumatic stress disorder.  
23  
24  
25

26 213

### 27 28 214 **Study Validation**

29  
30 215 Over 2010-2014, the change in rates of cannabis abuse admissions after versus before  
31  
32 216 recreational cannabis legalization in 2012 was greater in CO than in NY and OK (risk  
33  
34 217 ratio [RR], 1.27; 95% confidence interval [CI], 1.26 to 1.28 and RR 1.16; 95% CI 1.15 to  
35  
36 218 1.17; both  $P < 0.0005$ , respectively) (**figure 1A-B**). No significant changes comparing the  
37  
38 219 two control states, NY and OK, were observed over the same time period (RR 0.93;  
39  
40 220 95% CI 0.87 to 1.00;  $P = 0.05$ ).  
41  
42  
43  
44

45 221

### 46 47 222 **Inpatient Healthcare Utilization after Cannabis Legalization**

#### 48 49 223 *Number of admissions*

50  
51 224 In unadjusted analyses, CO, NY, and OK had a similar number of total admissions  
52  
53 225 before versus after recreational cannabis legalization (**figure 2A**). After adjusting for  
54  
55  
56  
57  
58  
59  
60



1  
2  
3 226 covariates, there was a reduction of number of admissions following cannabis  
4  
5 227 legalization in CO when compared to OK (RR 0.97; 95% CI 0.96 to 0.98;  $P<0.0005$ ).  
6  
7 228 The point estimate was similar when comparing CO to NY, but did not reach statistical  
8  
9 229 significance (RR 0.99; 95% CI 0.98 to 1.01;  $P=0.47$ ). Results were similar in sensitivity  
10  
11 230 analysis using January 1, 2014 as change of policy date (CO versus OK: RR 0.96; 95%  
12  
13 231 CI 0.96 to 0.96;  $P<0.0005$ , and CO versus NY: RR 0.99; 95% CI 0.96 to 1.02;  $P=0.59$ ).  
14  
15  
16  
17 232

### 19 233 *Length of stay*

20  
21 234 The median length of stay also remained similar after cannabis legalization across the 3  
22  
23 235 states in unadjusted analyses (**figure 2B**). After adjusting for covariates, length of  
24  
25 236 inpatient stay did not change significantly in CO following the law change when  
26  
27 237 compared with each of the 2 control states (1.75% annual reduction; 95% CI -12.25% to  
28  
29 238 10.01% in CO versus NY, and 3.46% annual reduction, 95% CI -16.48% to 37.90%  
30  
31 239 versus OK;  $P=0.30$  and  $P=0.20$ , respectively). Length of stay did not change  
32  
33 240 significantly in CO compared with the control states when we used January 1, 2014 as  
34  
35 241 change of policy date.  
36  
37  
38  
39

40 242

### 42 243 *Healthcare Costs*

43  
44 244 In unadjusted analyses, the 3 states exhibited similar total costs across the study time  
45  
46 245 period (**figure 2C** and eTable 2). In multivariate analyses, healthcare costs remained  
47  
48 246 similar in state comparisons (2.99%; 95% CI -7.55% to 14.74%;  $P=0.18$  versus NY and  
49  
50 247 3.45%; 95% CI -7.31% to 15.46%;  $P=0.16$  versus OK) after cannabis legalization. No  
51  
52 248 meaningful differences of healthcare costs were observed in the sensitivity analyses  
53  
54  
55  
56  
57  
58  
59  
60

249 with January 1, 2014 as change of policy date or when we assumed the cost-to-charge  
250 ratio for OK was equal to the average of the other states.

### 251 252 **Changes in Specific Diagnoses Highlighted by the National Academy of Sciences**

253 Among the diagnoses with either substantial or moderate evidence of influence by  
254 cannabis per the NAS, we distinguished between: 1) a group with no statistically  
255 significant post-legalization differences between control states (NY versus OK  $P>0.05$ ),  
256 suggesting that secular trends unlikely explained differences between CO and control  
257 states (**figure 3**); and 2) a group with significant differences in diagnoses post-  
258 legalization between control states (NY versus OK  $P<0.05$ ) (eFigure 1).

259 In the NY versus OK  $P>0.05$  group (**figure 3**), changes in rates of diagnoses  
260 after cannabis legalization reflected NAS-based evidence for most health outcomes.  
261 Among the diagnoses most consistent with NAS-based evidence, there was an increase  
262 in hospital admissions for motor vehicle accidents, alcohol abuse, overdose injury and a  
263 decrease of chronic pain hospitalizations after recreational cannabis legalization (each  
264 meeting statistical significance for both comparisons with control states). When using  
265 less stringent criteria ( $P<0.05$  for both comparisons with NY and OK but where the  
266 relative risk for only one comparison was in the same direction as NAS), admissions for  
267 abuse of other substances and social anxiety disorder also increased with recreational  
268 cannabis legalization (**figure 3**). Effects of cannabis liberalization on psychiatric  
269 outcomes (schizophrenia and bipolar disorders) were either not consistent or weakly  
270 consistent with NAS (**figure 3**). When differences between the two control states (NY  
271 and OK) were also significantly different (suggesting effects potentially related to

1  
2  
3 272 secular trends)(eFigure 1), changes in diagnoses were mostly not concordant with NAS  
4  
5 273 findings or one of the comparisons between CO and either NY or OK did not exhibit  
6  
7 274 statistical significance. Changes of the risk over time with counterfactuals are shown for  
8  
9  
10 275 each NAS diagnosis in online supplementary eFigures 2-15.

11  
12 276 In the sensitivity analysis using January 1, 2014 as change of policy date (eTable  
13  
14 277 3), the main findings highlighted in the primary analysis using our stringent criteria  
15  
16 278 (increase of admissions for alcohol abuse, motor vehicle accidents, overdose injury and  
17  
18 279 decrease of chronic pain hospitalizations) again met the same criteria in favor of  
19  
20 280 significant associations, except for overdose injury and chronic pain admissions (the  
21  
22 281 latter meeting 2 of the 3 criteria described in the Methods). In sensitivity analyses  
23  
24 282 removing “in remission” diagnoses, no meaningful changes were observed (relevant to  
25  
26 283 alcohol abuse and abuse of other substances).  
27  
28  
29  
30

31 284

## 32 33 285 **DISCUSSION**

### 34 35 286 **Principal findings**

36  
37 287 Legalization of recreational cannabis was associated with more cannabis abuse, and  
38  
39 288 minimal effects on overall healthcare utilization. Changes in specific medical diagnoses  
40  
41 289 post-legalization reflected previously published substantial or moderate evidence on the  
42  
43 290 health effects of cannabis, including an increase in alcohol abuse, overdose injury and a  
44  
45 291 decrease of chronic pain admissions.  
46  
47  
48

49 292 The increased frequency of hospitalizations for cannabis abuse in CO helps to  
50  
51 293 validate the concept that legalization would result in greater use.  
52  
53  
54  
55  
56  
57  
58  
59  
60

1  
2  
3 294 Effects of recreational cannabis legalization on healthcare utilization appeared to  
4  
5  
6 295 be overall neutral. There was no evidence that either the length of stay or healthcare  
7  
8 296 costs changed following liberalization of recreational cannabis. There was a reduction of  
9  
10 297 overall hospitalizations in CO when compared to OK but not compared to NY,  
11  
12 298 potentially because unaccounted state-level characteristics may have driven overall  
13  
14 299 admissions differently. Moreover, in the US healthcare system, hospitalized individuals  
15  
16  
17 300 tend to be sicker, with more severe forms of specific illnesses and higher inpatient costs  
18  
19 301 compared to outpatients. Therefore, our conclusions on overall neutral effects of  
20  
21 302 recreational cannabis on healthcare costs only reflect higher inpatient costs and not  
22  
23  
24 303 overall costs. Outpatient costs may include use of specific medications or substance  
25  
26 304 detoxification programs that are not captured in our study and may be more cost-  
27  
28 305 effective compared to inpatient treatments.

30  
31 306 Following legalization of recreational cannabis, changes in rates of medical  
32  
33 307 diagnoses reflected NAS-based evidence for most health outcomes. The absence of  
34  
35 308 statistically significant differences in these outcomes between the two control states (NY  
36  
37  
38 309 and OK) over the same time period provides some evidence that these observed  
39  
40 310 differences were less likely related to broader secular trends. After legalization of  
41  
42 311 recreational cannabis, there was an increase in motor vehicle accidents, alcohol abuse,  
43  
44  
45 312 overdose injury and a decrease of chronic pain admissions. In addition to information  
46  
47 313 provided in the NAS summary,<sup>3</sup> the association of cannabis with motor vehicle  
48  
49 314 accidents has been highlighted by recent literature.<sup>7, 8</sup> Consistent with our findings, a  
50  
51 315 substantial bidirectional comorbidity between cannabis use and alcohol use has been  
52  
53  
54 316 previously demonstrated, resulting in a moderate level of evidence designation for this

1  
2  
3 317 relationship per the NAS.<sup>9</sup> Also compatible with the NAS summary, we report that  
4  
5 318 recreational cannabis legalization was associated with an increasing number of  
6  
7 319 admissions for overdose injury. These included overdose of analgesics, barbiturates,  
8  
9 320 sedative, hypnotics and psychotropic drugs (eTable 2). This finding underlines the  
10  
11 321 association of cannabis use with other behaviors of drug addiction as highlighted by a  
12  
13 322 recent cross-sectional survey of over 30 thousand community-living US adults.<sup>10</sup> Finally,  
14  
15 323 reduction of chronic pain, especially neuropathic pain, in cannabis users is well known,  
16  
17 324 although prior literature has focused on medical rather than recreational cannabis.<sup>11, 12</sup>  
18  
19  
20  
21

22 325 Except for social anxiety, the effects of recreational cannabis legalization on  
23  
24 326 admissions for psychiatric disorders (schizophrenia, bipolar disorder, depression) were  
25  
26 327 weakly or not consistent with prior NAS-evidence. This finding may be related to  
27  
28 328 residual confounding by state-level characteristics, unaccounted secular trends, or  
29  
30 329 insufficient longitudinal follow-up.  
31  
32

33 330 We demonstrate that admissions for abuse of alcohol or other substances  
34  
35 331 remains higher after recreational cannabis legalization in a sensitivity analysis without  
36  
37 332 “in remission” diagnoses. Overall, these findings suggest that when the substance use  
38  
39 333 disorder is in remission, it does not play a significant role in overall results.  
40  
41

42 334 In our primary analysis, we used December 10, 2012 as the date of recreational  
43  
44 335 cannabis legalization. Following this date, private possession and growth of cannabis  
45  
46 336 became legal in Colorado. After January 1, 2014, recreational cannabis could be legally  
47  
48 337 purchased in retail stores.<sup>5</sup> To take the additional effect of retail sales of recreational  
49  
50 338 cannabis into account, we performed sensitivity analyses using January 2014 as the  
51  
52 339 “change of policy” date. We did not observe any meaningful difference in the majority of  
53  
54  
55  
56  
57  
58  
59  
60

1  
2  
3 340 the outcomes studied, suggesting that the effect of recreational cannabis on healthcare  
4  
5 341 utilization was independent of availability in stores.  
6  
7

8 342

9  
10 343 **Strengths and Weaknesses**

11  
12 344 Although several studies have investigated the health effects of cannabis,<sup>13</sup> they have  
13  
14 345 relied on small sample sizes or have generated conflicting data.<sup>14-16</sup> In contrast, our  
15  
16 346 findings are derived from HCUP state-wide data comprising over 28 million individuals  
17  
18 347 and over 16 million hospitalizations across CO, site of the 2012 *Amendment 64*, and 2  
19  
20 348 controls states without cannabis legalization over the same time period. As NY and OK  
21  
22 349 are very different geographically and demographically, we believe their inclusion as  
23  
24 350 control states represents a strength of our manuscript. Specifically, their selection  
25  
26 351 allowed us to demonstrate that the effects of recreational cannabis legalization on  
27  
28 352 health care utilization were likely independent of living in an urban or rural setting.  
29  
30

31  
32  
33 353 Several limitations should be acknowledged. The HCUP database relies on  
34  
35 354 physician coding; however, such coding for several medical diagnoses listed in **table 1**  
36  
37 355 have been shown to be highly specific with variable sensitivity<sup>17-20</sup> and HCUP has  
38  
39 356 proven to be a powerful tool in large population studies.<sup>20-24</sup> Some potentially important  
40  
41 357 mediators are not captured by ICD-9 codes, such as quantity of cannabis used or  
42  
43 358 formulation (oral versus other), although these may be more relevant to identifying  
44  
45 359 mechanisms and their absence would likely not lead to false positive results. Patients  
46  
47 360 may be more likely to disclose cannabis use following legalization of recreational  
48  
49 361 cannabis and clinicians may be more inclined to test for it. Hence, we cannot completely  
50  
51 362 exclude detection bias in the validation analysis showing an increase in cannabis abuse  
52  
53  
54  
55  
56  
57  
58  
59  
60

1  
2  
3 363 admissions following legalization of recreational cannabis. Moreover, we cannot exclude  
4  
5 364 that the increased frequency of cannabis abuse hospitalizations is simply related to  
6  
7  
8 365 severity of cannabis abuse rather than to a greater prevalence of cannabis use.  
9

10 366 As with any observational study, we cannot exclude residual confounding as an  
11  
12 367 explanation of our findings. However, we adjusted for conventionally recognized  
13  
14 368 confounders as appropriate and as available, and, as this was largely a study of the  
15  
16  
17 369 same populations pre- and post-legalization, many of the limitations inherent to  
18  
19 370 conventional individual-level analyses are likely less relevant.  
20

21 371 We did not select all US states as controls. Most states do not have HCUP data  
22  
23 372 up until the end of 2014, each requires a separate HCUP application, and each carries  
24  
25 373 significant costs. We acknowledge this represents a limitation as we could not fully  
26  
27  
28 374 account for secular trends that might influence results. However, we have adjusted all  
29  
30 375 analyses for urbanicity and other state-level differences in order to minimize the impact  
31  
32  
33 376 of secular trends. We also acknowledge that CO had legalized medical cannabis prior to  
34  
35 377 legalization of recreational cannabis on December 10, 2012. However, control states  
36  
37  
38 378 NY and OK had not. We could have selected control states that had already  
39  
40 379 medicalized cannabis instead of NY and OK, but we acknowledge that complex  
41  
42 380 differences exist among medical legalization regimens among states.<sup>25</sup> Hence, we  
43  
44  
45 381 believe selection of control states with diverse medical legalization regimens would  
46  
47 382 have primarily reduced our power to detect a real difference rather than contribute to  
48  
49 383 any false positive spurious results. In our study, we demonstrate that legalization of  
50  
51 384 recreational cannabis is associated with more admissions for cannabis abuse or  
52  
53  
54 385 cannabis use disorder. Prior large, multi-state, population-based analyses have shown  
55  
56  
57  
58  
59  
60

1  
2  
3 386 that legalization of medical cannabis is associated with increased cannabis use, but not  
4  
5 387 increased cannabis use disorder.<sup>26</sup> One could speculate that medical cannabis  
6  
7 388 consumption is more controlled and rationed when compared to recreational cannabis,  
8  
9  
10 389 the latter available in both retail stores and private homes and therefore perhaps more  
11  
12 390 easily abused. Further studies are needed to quantify the amount of cannabis  
13  
14 391 consumption (in grams) in states where only medical cannabis is legal versus states  
15  
16 392 where both medical and recreational cannabis are allowed.

17  
18  
19 393 The HCUP database does not capture information regarding outpatient activity  
20  
21 394 and therefore these findings are restricted to hospital-based medicine. However, even  
22  
23 395 inclusion of outpatient data would not capture individuals with a specific condition or  
24  
25 396 diagnosis who are not in formal treatment. Indeed, treatment databases do not capture  
26  
27 397 all individuals in the population. This gap may be especially large for substance use  
28  
29 398 disorders. Many individuals with substance use disorders may never enter treatment;  
30  
31 399 even those who do more likely receive outpatient treatment, rather than a  
32  
33 400 hospitalization, so they may not have been included in our study.

34  
35  
36  
37  
38 401 Our use of stringent criteria in assessing changes related to NAS diagnoses may  
39  
40 402 have been too conservative, leading to a sacrifice of false negatives in order to avoid  
41  
42 403 false positives.

43  
44  
45 404 Finally, our study was limited to two-year follow-up after recreational cannabis  
46  
47 405 legalization, and we therefore cannot comment on long-term effects that may result.

48  
49  
50 406

## 51 52 407 **Conclusions**



1  
2  
3 408 In conclusion, recreational cannabis legalization is associated with an expected  
4  
5 409 increase in cannabis use disorder. Overall effects on inpatient healthcare utilization  
6  
7 410 appear to be neutral, with subtle changes in various components of that utilization likely  
8  
9 411 occurring due to changes in the types of admissions observed. Measurable effects of  
10  
11 412 recreational cannabis legalization on increasing hospitalizations for motor vehicle  
12  
13 413 accidents, alcohol abuse, overdose injury and reducing chronic pain admissions are  
14  
15 414 consistent with previously published evidence. These data provide the first description  
16  
17 415 of population-level effects that may help guide future decisions regarding cannabis  
18  
19 416 policy, individuals considering using cannabis, and physicians caring for those who may  
20  
21  
22  
23  
24 417 choose to consume it.  
25  
26  
27  
28  
29  
30  
31  
32  
33  
34  
35  
36  
37  
38  
39  
40  
41  
42  
43  
44  
45  
46  
47  
48  
49  
50  
51  
52  
53  
54  
55  
56  
57  
58  
59  
60

1  
2  
3 418 **Contributors** FND and GMM had full access to all of the data in the study and take  
4  
5 419 responsibility for the integrity of the data and the accuracy of the data analysis. FND  
6  
7 420 and GMM were responsible for the study concept and design. All authors (FND, EV,  
8  
9 421 TAD, MJP, JEO, GN, KA, CDF, ESL, SMF, DSK, and GMM) contributed to data  
10  
11 422 acquisition, analysis, and interpretation. EV, GN, and GMM completed the statistical  
12  
13 423 analysis. FND and GMM drafted the manuscript and were responsible for the critical  
14  
15 424 revision of the manuscript for important intellectual content. GMM obtained funding for  
16  
17 425 the study. All authors contributed to the administrative, technical, and material support  
18  
19 426 for the study and approved the final version of the manuscript.

20  
21  
22 427 **Funding** This work was supported by the Agency for Healthcare Research and Quality  
23  
24 428 (AHRQ) and Health Care Information (HCI) Division of the Oklahoma State Department  
25  
26 429 of Health. The funding source had no role in the design, conduct, or analysis of the  
27  
28 430 study; data analysis or interpretation; preparation of the manuscript; or the decision to  
29  
30 431 submit the manuscript for publication.

31  
32  
33 432 **Competing interests** None declared.

34  
35 433 **Patient consent** Not required.

36  
37 434 **Ethics approval** Ethical approval to use de-identified HCUP data was obtained from  
38  
39 435 the University of California, San Francisco Committee on Human Research.

40  
41 436 **Data sharing** Data consist of deidentified participant data (i.e. ICD-9 admission  
42  
43 437 diagnoses) available from the Healthcare Cost and Utilization Project (HCUP) for a fee.  
44  
45 438 Information about how to obtain the data and for what time period can be found at:  
46  
47 439 <https://www.hcup-us.ahrq.gov/>

48  
49 440 **Open access** This is an open access article distributed in accordance with the

1  
2  
3 441 Creative Commons Attribution Non Commercial (CC BY-NC 4.0) license, which  
4  
5 442 permits others to distribute, remix, adapt, build upon this work non-commercially,  
6  
7 443 and license their derivative works on different terms, provided the original work is  
8  
9 444 properly cited, appropriate credit is given, any changes made indicated, and the use  
10  
11 445 is non-commercial. See: <http://creativecommons.org/licenses/by-nc/4.0/>.  
12  
13  
14  
15  
16  
17  
18  
19  
20  
21  
22  
23  
24  
25  
26  
27  
28  
29  
30  
31  
32  
33  
34  
35  
36  
37  
38  
39  
40  
41  
42  
43  
44  
45  
46  
47  
48  
49  
50  
51  
52  
53  
54  
55  
56  
57  
58  
59  
60

For peer review only

1  
2  
3 446 **References**  
4

- 5 447 1. Substance Abuse and Mental Health Services Administration. *Behavioral health*  
6  
7 448 *trends in the United States: Results from the 2014 National Survey on Drug Use and*  
8  
9 449 *Health*. Rockville, MD: U.S. Dept. of Health and Human Services; 2016. HHS  
10  
11  
12 450 Publication No. SMA 15-4927, NSDUH Series H-50.  
13  
14 451 2. State Medical Marijuana Laws 2016. National Conference of State Legislatures.  
15  
16 <http://www.ncsl.org/research/health/state-medical-marijuana-laws.aspx>. Updated June  
17 452  
18 27, 2018. Accessed March 14, 2019.  
19 453  
20  
21 454 3. Committee on the Health Effects of Marijuana, Board on Population Health and  
22  
23 Public Health Practice, Health and Medicine Division, National Academies of Sciences,  
24 455 Engineering, and Medicine. *The Health Effects of Cannabis and Cannabinoids : The*  
25  
26 456 *Current State of Evidence and Recommendations for Research*. Washington, DC: The  
27  
28 457 National Academies Press; 2017.  
29  
30  
31 458 4. *Colorado Marijuana Legalization Initiative, Amendment 64 2012 (Colo.)*  
32  
33 459  
34  
35 460 5. Wark, J. Up Early and in Line for a Marijuana Milestone in Colorado. The New  
36  
37 York Times [Internet]. 2014 Jan 1 [cited 2019 Feb 14];U.S.: [about 2 p.]. Available from:  
38 461  
39 [https://www.nytimes.com/2014/01/02/us/colorado-stores-throw-open-their-doors-to-pot-](https://www.nytimes.com/2014/01/02/us/colorado-stores-throw-open-their-doors-to-pot-buyers.html)  
40 462  
41 buyers.html  
42 463  
43  
44 464 6. Institute for Health & Socioeconomic Policy. *Average Charge-to-cost Ratio by*  
45  
46 *State*. Silver Spring, MD: National Nurses United; 2012.  
47 465  
48  
49 466 7. Rogeberg O. A meta-analysis of the crash risk of cannabis-positive drivers in  
50  
51 culpability studies--Avoiding interpretational bias. *Accid Anal Prev*. 2019;123:69-78.  
52 467  
53  
54  
55  
56  
57  
58  
59  
60

- 1  
2  
3 468 8. Hostiuc S, Moldoveanu A, Negoii I, Drima E. The association of unfavorable  
4  
5 469 traffic events and cannabis usage: a meta-analysis. *Front Pharmacol*. 2018;9:99.  
6  
7  
8 470 9. Blanco C, Hasin DS, Wall MM, et al. Cannabis Use and Risk of Psychiatric  
9  
10 471 Disorders: Prospective Evidence From a US National Longitudinal Study. *JAMA*  
11  
12 472 *Psychiatry*. 2016;73(4):388-95.  
13  
14  
15 473 10. Hayley AC, Stough C, Downey LA. DSM-5 cannabis use disorder, substance  
16  
17 474 use and DSM-5 specific substance-use disorders: Evaluating comorbidity in a  
18  
19 475 population-based sample. *Eur Neuropsychopharmacol*. 2017;27(8):732-743.  
20  
21  
22 476 11. Whiting PF, Wolff RF, Deshpande S, et al. Cannabinoids for medical use: A  
23  
24 477 systematic review and meta-analysis. *JAMA*. 2015;313(24):2456-73.  
25  
26  
27 478 12. Hill KP. Medical marijuana for treatment of chronic pain and other medical and  
28  
29 479 psychiatric problems: A clinical review. *JAMA*. 2015;313(24):2474-83.  
30  
31 480 13. Karila L, Roux P, Rolland B, et al. Acute and long-term effects of cannabis use: a  
32  
33 481 review. *Curr Pharm Des*. 2014;20(25):4112-8.  
34  
35  
36 482 14. Schreiner AM, Dunn ME. Residual effects of cannabis use on neurocognitive  
37  
38 483 performance after prolonged abstinence: a meta-analysis. *Exp Clin Psychopharmacol*.  
39  
40 484 2012;20(5):420-9.  
41  
42  
43 485 15. Volkow ND. Effects of Cannabis Use on Human Behavior-Reply. *JAMA*  
44  
45 486 *Psychiatry*. 2016;73(9):996.  
46  
47  
48 487 16. Lynskey MT, Glowinski AL, Todorov AA, et al. Major depressive disorder, suicidal  
49  
50 488 ideation, and suicide attempt in twins discordant for cannabis dependence and early-  
51  
52 489 onset cannabis use. *Arch Gen Psychiatry*. 2004;61(10):1026-32.  
53  
54  
55  
56  
57  
58  
59  
60

- 1  
2  
3 490 17. Kim HM, Smith EG, Stano CM, et al. Validation of key behaviourally based  
4  
5 491 mental health diagnoses in administrative data: suicide attempt, alcohol abuse, illicit  
6  
7 492 drug abuse and tobacco use. *BMC Health Serv Res*. 2012;12:18.
- 8  
9  
10 493 18. McCormick N, Lacaille D, Bhole V, Avina-Zubieta JA. Validity of myocardial  
11  
12 494 infarction diagnoses in administrative databases: a systematic review. *PLoS One*.  
13  
14 495 2014;9(3):e92286.
- 15  
16  
17 496 19. Dewland TA, Glidden DV, Marcus GM. Healthcare Utilization and Clinical  
18  
19 497 Outcomes after Catheter Ablation of Atrial Flutter. *PLoS ONE*. 2014;9(7):e100509.
- 20  
21  
22 498 20. Dukes JW, Dewland TA, Vittinghoff E, et al. Access to alcohol and heart disease  
23  
24 499 among patients in hospital: observational cohort study using differences in alcohol sales  
25  
26 500 laws. *BMJ*. 2016;353:i2714.
- 27  
28  
29 501 21. Dewland TA, Olgin JE, Vittinghoff E, Marcus GM. Incident atrial fibrillation among  
30  
31 502 Asians, Hispanics, blacks, and whites. *Circulation*. 2013;128(23):2470-7.
- 32  
33  
34 503 22. Birkmeyer JD, Siewers AE, Finlayson EV, et al. Hospital volume and surgical  
35  
36 504 mortality in the United States. *N Engl J Med*. 2002;346(15):1128-37.
- 37  
38  
39 505 23. Gialdini G, Nearing K, Bhave PD, et al. Perioperative atrial fibrillation and the  
40  
41 506 long-term risk of ischemic stroke. *JAMA*. 2014;312(6):616-22.
- 42  
43  
44 507 24. Whitman IR, Agarwal V, Nah G, et al. Alcohol Abuse and Cardiac Disease. *J Am*  
45  
46 508 *Coll Cardiol*. 2017;69(1):13-24.
- 47  
48  
49 509 25. Williams AR, Olsson M, Kim JH, Martins SS, Kleber HD. Older, less regulated  
50  
51 510 medical marijuana programs have much greater enrollment rates than newer  
52  
53 511 'medicalized' programs. *Health Aff (Millwood)*. 2016;35(3):480-8.
- 54  
55  
56  
57  
58  
59  
60

- 1  
2  
3 512 26. Williams AR, Santaella-Tenorio J, Mauro CM, Levin FR, Martins SS. Loose  
4  
5 513 regulation of medical marijuana programs associated with higher rates of adult  
6  
7 514 marijuana use but not cannabis use disorder. *Addiction*. 2017;112(11):1985-1991.  
8  
9  
10  
11  
12  
13  
14  
15  
16  
17  
18  
19  
20  
21  
22  
23  
24  
25  
26  
27  
28  
29  
30  
31  
32  
33  
34  
35  
36  
37  
38  
39  
40  
41  
42  
43  
44  
45  
46  
47  
48  
49  
50  
51  
52  
53  
54  
55  
56  
57  
58  
59  
60

For peer review only

1  
2  
3 515 **FIGURE LEGENDS**  
4

5 516 **Figure 1.** Multivariate adjusted rates of admissions for cannabis abuse over 2010-2014  
6  
7 517 in Colorado, site of implementation of the 2012 recreational cannabis legalization policy,  
8  
9 518 compared with New York (A) and Oklahoma (B), control states without cannabis  
10  
11 519 legalization. Red lines show the predicted rates of admissions for cannabis abuse had  
12  
13 520 the cannabis legalization policy not been instituted. The comparison between Colorado  
14  
15 521 and the control states with regards to change of risk ratio (RR) slope within the 2010-  
16  
17 522 2012 period (pre-legalization) and 2012-2014 period (post-legalization), as well of the  
18  
19 523 overall RR slope change, are also represented for the Colorado versus New York (A)  
20  
21 524 and Colorado versus Oklahoma (B) comparisons. Red lines show the predicted rates of  
22  
23 525 admissions for cannabis abuse had the cannabis legalization policy not been instituted.  
24  
25 526 Each model was adjusted for age, gender, and race and state-level characteristics (see  
26  
27 527 Methods section for further details). CI = confidence interval; vs = versus.  
28  
29  
30  
31  
32

33 528  
34  
35 529 **Figure 2.** Healthcare utilization over 2010-2014 in Colorado, site of implementation of  
36  
37 530 the 2012 recreational cannabis legalization policy, and in New York and Oklahoma,  
38  
39 531 control states without cannabis legalization. The total number of admissions/1000  
40  
41 532 population per year, the median length of stay per year, and the median costs per  
42  
43 533 individual per year are shown in panels A, B, and C, respectively for the 3 states. Error  
44  
45 534 bars denote interquartile ranges. LOS = length of stay.  
46  
47  
48

49 535  
50  
51 536 **Figure 3.** Health outcomes with substantial or moderate evidence of a statistical  
52  
53 537 association with cannabis use based on the National Academy of Science (NAS)  
54  
55  
56  
57  
58  
59  
60



1  
2  
3 538 summary statement. Medical diagnoses are identified based on a non-significant  
4  
5 539 ( $P>0.05$ ) comparison between New York (NY) and Oklahoma (OK) (control states  
6  
7 540 without cannabis legalization) with regards to the change of admission rates for such  
8  
9 541 diagnoses following cannabis legalization.  $P$  values for the comparison between  
10  
11 542 Colorado (CO) (site of cannabis legalization) and NY (rhomboid symbol), or between  
12  
13 543 CO and OK (circular symbol) are shown as either  $<0.05$ , or  $> 0.05$  using a gray scale for  
14  
15 544 evidence of cannabis benefit (risk ratio [RR]  $< 1$  shown on the left) and cannabis harm  
16  
17 545 (RR $>1$  shown on the right); 95% confidence intervals are shown for the comparison  
18  
19 546 between CO and NY and between CO and OK as solid and dotted lines, respectively.  
20  
21  
22 547 Progressively darker shades of green or red indicate greater weight of evidence in the  
23  
24 548 direction of proposed benefit versus harm, respectively, by the NAS.  
25  
26  
27  
28  
29  
30  
31  
32  
33  
34  
35  
36  
37  
38  
39  
40  
41  
42  
43  
44  
45  
46  
47  
48  
49  
50  
51  
52  
53  
54  
55  
56  
57  
58  
59  
60

**Table 1.** Clinical characteristics of the 3 study states over the 2010-2014 period.

|                                                                             | Colorado       | New York       | Oklahoma       | <i>P</i> value |
|-----------------------------------------------------------------------------|----------------|----------------|----------------|----------------|
| Total population                                                            | 5,197,237      | 19,594,599     | 3,819,383      |                |
| Total admissions                                                            | 2,088,909      | 11,726,283     | 2,334,988      |                |
| Total admissions/1,000 population                                           | 402±0.27       | 598±0.17       | 611±0.40       | 0.0001         |
| <b>Demographics</b>                                                         |                |                |                |                |
| Age – yr                                                                    | 45 ± 28        | 49 ± 28        | 48 ± 28        | 0.0001         |
| Male – no. (%)                                                              | 870,573 (42)   | 5,087,181 (41) | 954,848 (43)   | 0.0001         |
| Race – no. (%)                                                              |                |                |                | 0.0001         |
| White                                                                       | 1,548,099 (74) | 6,406,582 (55) | 1,879,727 (81) |                |
| Black                                                                       | 102,444 (5)    | 2,083,366 (18) | 202,420 (9)    |                |
| Native American                                                             | 13,143 (1)     | 36,216 (0.3)   | 131,714 (6)    |                |
| Other                                                                       | 425,223 (20)   | 3,200,119 (27) | 121,127 (5)    |                |
| <b>Lifestyle</b>                                                            |                |                |                |                |
| Median Household Income, dollars (quartiles for patient ZIP code) – no. (%) |                |                |                | 0.0001         |
| Quartile 1                                                                  | 617,537 (30)   | 3,087,192 (28) | No data        |                |
| Quartile 2                                                                  | 558,760 (27)   | 2,623,087 (24) |                |                |
| Quartile 3                                                                  | 470,051 (23)   | 2,673,153 (24) |                |                |
| Tobacco use – no. (%)                                                       | 251,566 (12)   | 1,717,940 (10) | 235,685 (14)   | 0.0001         |
| Alcohol abuse – no. (%)                                                     | 112,715 (5)    | 652,608 (6)    | 71,931 (3)     | 0.0001         |
| <b>NAS Diagnoses</b>                                                        |                |                |                |                |
| Non-seminoma type testicular germ cell cancer – no. (%)                     | 405 (0.02)     | 2,487 (0.02)   | 480 (0.02)     | 0.0001         |
| Acute myocardial infarction – no. (%)                                       | 39,513 (1.9)   | 271,285 (2.3)  | 60,413 (2.6)   | 0.0001         |
| Brain hemorrhage – no. (%)                                                  | 10,963 (0.5)   | 58,278 (0.5)   | 10,245 (0.4)   | 0.0001         |
| Ischemic stroke – no. (%)                                                   | 27,986 (1.3)   | 194,478 (1.7)  | 45,602 (2)     | 0.0001         |

|                                                                    |               |                |               |        |
|--------------------------------------------------------------------|---------------|----------------|---------------|--------|
| Metabolic syndrome & diabetes – no. (%)                            | 294,821 (14)  | 2,301,835 (20) | 465,353 (20)  | 0.0001 |
| Prediabetes – no. (%)                                              | 42,544 (2)    | 73,407 (0.6)   | 24,246 (1)    | 0.0001 |
| Bronchitis – no. (%)                                               | 65,265 (3)    | 429,230 (4)    | 131,343 (6)   | 0.0001 |
| Motor vehicle accidents – no. (%)                                  | 14,941 (0.7)  | 59,686 (0.5)   | 13,692 (0.6)  | 0.0001 |
| Overdose injury – no. (%)                                          | 10,933 (0.5)  | 40,226 (0.3)   | 12,147 (0.5)  | 0.0001 |
| Substance use disorder – no. (%)                                   | 158,244 (7.6) | 974,856 (8.3)  | 109,305 (4.7) | 0.0001 |
| Anxiety disorders – no. (%)                                        | 131,426 (6.4) | 595,478 (5.2)  | 139,627 (6.1) | 0.0001 |
| Anxiety disorders (except social anxiety) – no. (%)                | 51,913 (2.5)  | 283,280 (2.4)  | 65,279 (2.8)  | 0.0016 |
| Bipolar disorders – no. (%)                                        | 52,348 (2.5)  | 287,735 (2.5)  | 61,411 (2.6)  | 0.0001 |
| Depressive disorders – no. (%)                                     | 213,851 (10)  | 827,932 (7)    | 190,083 (8)   | 0.0001 |
| Schizophrenia or other psychoses – no. (%)                         | 53,652 (2.6)  | 352,533 (3)    | 68,385 (2.9)  | 0.0001 |
| Positive symptoms of schizophrenia (i.e. hallucinations) – no. (%) | 2,653 (0.1)   | 9,482 (0.1)    | 3,531 (0.2)   | 0.0001 |
| Post-traumatic stress disorder – no. (%)                           | 28,582 (1.4)  | 75,608 (0.6)   | 17,101 (0.7)  | 0.0001 |
| Social anxiety disorder – no. (%)                                  | 295 (0.01)    | 1,090 (0.01)   | 135 (0.01)    | 0.0295 |
| Suicide – no. (%)                                                  | 4,957 (0.2)   | 15,646 (0.1)   | 4,407 (0.2)   | 0.0001 |
| Low offspring birthweight – no. (%)                                | 2,842 (0.1)   | 7,462 (0.1)    | 1,742 (0.1)   | 0.0002 |
| Maternal pregnancy complications – no. (%)                         | 39,343 (1.9)  | 144,353 (1.2)  | 40,938 (1.8)  | 0.0001 |
| Unemployment/low income – no. (%)                                  | 3,134 (0.2)   | 76,789 (0.7)   | 730 (0.03)    | 0.0001 |
| Nausea or vomiting – no. (%)                                       | 63,806 (3)    | 162,11(1.4)    | 58,706 (2.5)  | 0.0001 |
| Chronic pain – no. (%)                                             | 140,209 (6)   | 234,160 (2)    | 123,563 (5)   | 0.0001 |
| Spasticity – no. (%)                                               | 5,759 (0.3)   | 12,517 (0.1)   | 5,371 (0.2)   | 0.0001 |

|                                            |              |              |            |        |
|--------------------------------------------|--------------|--------------|------------|--------|
| Short-term sleep – no. (%)                 | 652 (0.03)   | 3,364 (0.03) | 357 (0.02) | 0.0001 |
| Tourette syndrome – no. (%)                | 428 (0.02)   | 2,784 (0.02) | 336 (0.01) | 0.0001 |
| Increased appetite & weight gain – no. (%) | 1,022 (0.05) | 3,017 (0.03) | 651 (0.03) | 0.0001 |

549 NAS = National Academy of Science. Admission diagnoses listed were based on those  
 550 found influenced by cannabis in the 2017 NAS review.<sup>3</sup> Substance use disorder includes  
 551 dependence or abuse of alcohol, tobacco, or other illicit drug. All variables pertain to the  
 552 2010-2014 period. Plus-minus values are means  $\pm$  SD. No. (%) indicates number of  
 553 admissions with a specific demographic/lifestyle characteristic or NAS diagnosis (% of  
 554 total admissions). A *P* value less than 0.05 is considered statistically significant.

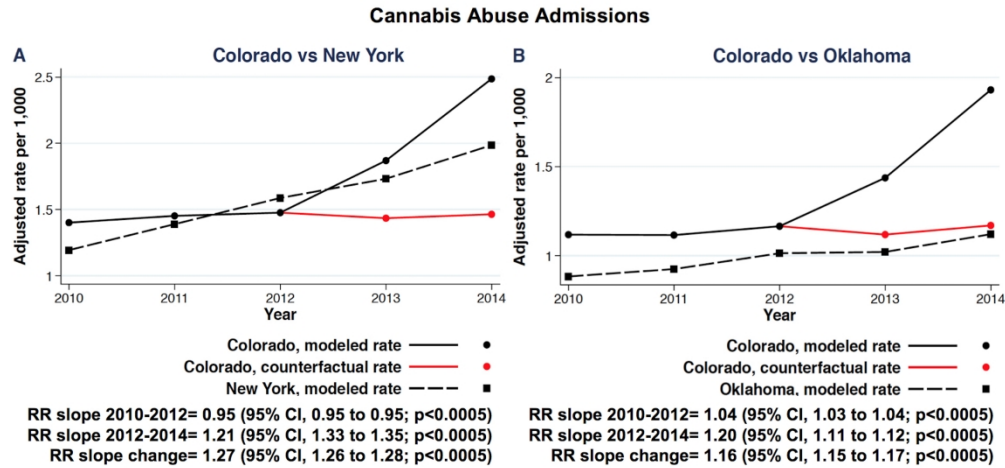

Multivariate adjusted rates of admissions for cannabis abuse over 2010-2014 in Colorado, site of implementation of the 2012 recreational cannabis legalization policy, compared with New York (A) and Oklahoma (B), control states without cannabis legalization. Red lines show the predicted rates of admissions for cannabis abuse had the cannabis legalization policy not been instituted. The comparison between Colorado and the control states with regards to change of risk ratio (RR) slope within the 2010-2012 period (pre-legalization) and 2012-2014 period (post-legalization), as well as the overall RR slope change, are also represented for the Colorado versus New York (A) and Colorado versus Oklahoma (B) comparisons. Red lines show the predicted rates of admissions for cannabis abuse had the cannabis legalization policy not been instituted. Each model was adjusted for age, gender, and race and state-level characteristics (see Methods section for further details). CI = confidence interval; vs = versus.

663x316mm (300 x 300 DPI)



Healthcare utilization over 2010-2014 in Colorado, site of implementation of the 2012 recreational cannabis legalization policy, and in New York and Oklahoma, control states without cannabis legalization. The total number of admissions/1000 population per year, the median length of stay per year, and the median costs per individual per year are shown in panels A, B, and C, respectively for the 3 states. Error bars denote interquartile ranges. LOS = length of stay.

160x221mm (300 x 300 DPI)

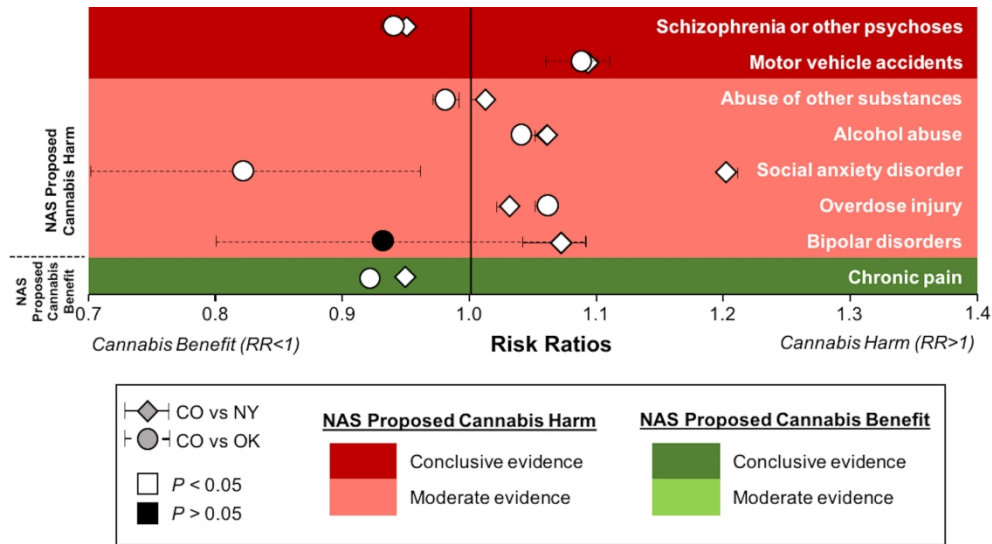

Health outcomes with substantial or moderate evidence of a statistical association with cannabis use based on the National Academy of Science (NAS) summary statement. Medical diagnoses are identified based on a non-significant ( $P > 0.05$ ) comparison between New York (NY) and Oklahoma (OK) (control states without cannabis legalization) with regards to the change of admission rates for such diagnoses following cannabis legalization. P values for the comparison between Colorado (CO) (site of cannabis legalization) and NY (rhomboid symbol), or between CO and OK (circular symbol) are shown as either  $< 0.05$ , or  $> 0.05$  using a gray scale for evidence of cannabis benefit (risk ratio [RR]  $< 1$  shown on the left) and cannabis harm (RR  $> 1$  shown on the right); 95% confidence intervals are shown for the comparison between CO and NY and between CO and OK as solid and dotted lines, respectively. Progressively darker shades of green or red indicate greater weight of evidence in the direction of proposed benefit versus harm, respectively, by the NAS.

188x101mm (300 x 300 DPI)

## Supplementary Appendix

### Changes in Inpatient Healthcare Utilization after Legalization of Recreational Cannabis

Francesca N. Delling, MD, MPH;<sup>1</sup> Eric Vittinghoff, PhD;<sup>1</sup> Thomas A. Dewland, MD;<sup>2</sup> Mark J. Pletcher, MD, MPH;<sup>1</sup> Jeffrey E. Olgin, MD;<sup>1</sup> Gregory Nah, MA;<sup>1</sup> Kirstin Aschbacher, PhD;<sup>1</sup> Christina Fang, BA;<sup>1</sup> Emily S. Lee, BA;<sup>1</sup> Shannon M. Fan, BA;<sup>1</sup> Dhruv S. Kazi, MD, MS;<sup>1</sup> and Gregory M. Marcus, MD, MAS.<sup>1</sup>

<sup>1</sup>Department of Medicine, Division of Cardiology, University of California, San Francisco, San Francisco, CA, USA

<sup>2</sup>Knight Cardiovascular Institute, Oregon Health & Science University, Portland, OR, USA

#### Table of Contents

**eMethods.** Cost Analysis

**eTable 1.** Yearly costs and charges for the 3 study states

**eTable 2.** International Classification of Diseases-9<sup>th</sup> Edition (ICD-9) codes defining each medical diagnosis

**eFigure 1.** Health outcomes with substantial or moderate evidence of a statistical association with cannabis use based on the National Academy of Science (NAS) summary statement

**eFigure 2-15.** Plots depicting admission rates for diagnoses classified based on weight of evidence from the National Academy of Science

**eTable 3.** Changes in specific NAS outcomes in a sensitivity analysis using January 2014 as the date of recreational cannabis legalization

This supplementary material has been provided by the authors to give readers additional information about their work.



## eMethods. Cost Analysis

### Cost Estimations

The inpatient cost for each hospitalization in New York and Colorado was estimated by multiplying the total charges (TOTCHG) obtained from HCUP State Inpatient Database with the institution-specific all-payer cost-to-charge ratio (APICC) obtained from the Cost-to-Charge Ratio file. Hospital ID was used as a linkage to merge both files. Total inpatient costs were calculated as the sum of the cost for all hospitalizations in a given state for a particular year. The databases contained 186,226 (8.7%) encounters with non-matched/missing hospital ID for NY and 1,132,696 (9.6%) encounters with non-matched/missing hospital ID for Colorado; for these encounters. In order to estimate the cost of these hospitalizations (for which we had charges but no cost-to-charge ratio) we applied the average cost-to-charge ratio for that state-year. This was estimated by dividing the sum of costs for all hospitalizations for which cost-to-charge ratios were available by the sum of charges for all hospitalizations for which cost-to-charge ratios were available in a given state-year (eTable 2).

### Oklahoma Total Cost Estimate

HCUP does not produce SID and CCR file for Oklahoma. We obtained these data from Oklahoma State Department of Health – this dataset contains information about total charges but not cost-to-charge ratios. We estimated total inpatient costs in Oklahoma in two ways. First, we used a state-wide constant cost-to-charge ratio (0.3119) to estimate the total cost (ratio derived from the Institute for Health and Socio-Economic Policy calculations of federal cost reports). We then conducted a sensitivity analysis in which we used the average of the cost-to-charge ratios of New York and Colorado for any given state-year (eTable 2).

**eTable 1.** Yearly costs and charges for the 3 study states

| <b>Colorado</b>                                                   | <b>2010</b>      | <b>2011</b>      | <b>2012</b>      | <b>2013</b>      | <b>2014</b>      | <b>2010 to 2014</b> |
|-------------------------------------------------------------------|------------------|------------------|------------------|------------------|------------------|---------------------|
| Total hospitalizations, n                                         | 397,505          | 428,912          | 424,640          | 418,952          | 418,900          | 2,088,909           |
| Hospitalizations for which CCR is available, n (%)                | 396,433 (99.7%)  | 301,586 (70.3%)  | 382,021 (90.0%)  | 412,483 (98.5%)  | 413,160 (98.6%)  | 1,905,683 (91.2%)   |
| Total charges for hospitalizations for which CCR is available     | \$14,382,791,648 | \$11,170,040,412 | \$15,821,232,608 | \$19,349,895,615 | \$20,370,018,114 | \$81,093,978,397    |
| Total costs for hospitalizations for which CCR is available       | \$4,104,443,164  | \$3,033,915,324  | \$3,963,892,093  | \$4,619,884,886  | \$4,700,380,255  | \$20,422,515,722    |
| Average CCR*                                                      | 0.2854           | 0.2716           | 0.2505           | 0.2388           | 0.2309           |                     |
| Hospitalizations for which CCR is not available, n (%)            | 1,072 (0.3%)     | 127,326 (29.7%)  | 42,619 (10.0%)   | 6,469 (1.5%)     | 5,740 (1.4%)     | 183,226 (8.8%)      |
| Total charges for hospitalizations for which CCR is not available | \$55,039,614     | \$5,704,285,087  | \$2,494,379,901  | \$241,011,451    | \$211,228,665    | \$8,705,944,718     |
| Total costs for hospitalizations for which CCR is not available†  | \$15,708,306     | \$1,549,283,830  | \$624,842,165    | \$57,553,535     | \$48,772,699     | \$2,296,160,534     |
| Total inpatient costs                                             | \$4,120,151,470  | \$4,583,199,154  | \$4,588,734,258  | \$4,677,438,421  | \$4,749,152,954  | \$22,718,676,256    |

\*Average CCR was estimated by dividing the total of costs for all hospitalizations for which cost-to-charge ratios were available by the total charges for hospitalizations for which cost-to-charge ratios were available in a given state-year.

†Total charges for hospitalization for which CCR is not available multiplied by Average CCR in a given state-year.

| <b>New York</b>                                                   | <b>2010</b>       | <b>2011</b>       | <b>2012</b>       | <b>2013</b>       | <b>2014</b>       | <b>2010 to 2014</b> |
|-------------------------------------------------------------------|-------------------|-------------------|-------------------|-------------------|-------------------|---------------------|
| Total hospitalizations, n                                         | 2,417,298         | 2,414,985         | 2,389,701         | 2,290,502         | 2,213,797         | 11,726,283          |
| Hospitalizations for which CCR is available, n (%)                | 2,189,513 (90.6%) | 2,157,629 (89.3%) | 2,168,880 (90.8%) | 2,056,367 (89.8%) | 2,021,199 (91.3%) | 10,593,588 (90.3%)  |
| Total charges for hospitalizations for which CCR is available     | \$66,303,900,691  | \$69,885,515,755  | \$74,728,795,811  | \$77,680,292,105  | \$79,252,368,106  | \$367,850,872,468   |
| Total costs for hospitalizations for which CCR is available       | \$22,376,381,374  | \$23,448,311,348  | \$24,539,963,919  | \$24,331,920,273  | \$23,892,478,440  | \$118,589,055,354   |
| Average CCR*                                                      | 0.3375            | 0.3355            | 0.3283            | 0.3132            | 0.3014            |                     |
| Hospitalizations for which CCR is not available, n (%)            | 227,785 (9.4%)    | 257,356 (10.7%)   | 220,821 (9.2%)    | 234,135 (10.2%)   | 192,598 (8.7%)    | 1,132,695 (9.7%)    |
| Total charges for hospitalizations for which CCR is not available | \$4,168,104,163   | \$4,821,903,339   | \$4,088,909,686   | \$5,687,320,556   | \$5,336,461,039   | \$24,102,698,783    |
| Total costs for hospitalizations for which CCR is not available†  | \$1,406,735,155   | \$1,617,748,571   | \$1,342,797,941   | \$1,781,268,798   | \$1,608,409,357   | \$7,756,959,821     |
| Total inpatient costs                                             | \$23,783,116,529  | \$25,066,059,919  | \$25,882,761,860  | \$26,113,189,071  | \$25,500,887,797  | \$126,346,015,175   |

\*Average CCR was estimated by dividing the total of costs for all hospitalizations for which cost-to-charge ratios were available by the total charges for hospitalizations for which cost-to-charge ratios were available in a given state-year.

†Total charges for hospitalization for which CCR is not available multiplied by Average CCR in a given state-year.

| <b>Oklahoma</b>                                               | <b>2010</b>      | <b>2011</b>      | <b>2012</b>      | <b>2013</b>      | <b>2014</b>      | <b>2010 to 2014</b> |
|---------------------------------------------------------------|------------------|------------------|------------------|------------------|------------------|---------------------|
| Total hospitalizations, n                                     | 489,724          | 476,605          | 476,728          | 452,724          | 439,207          | 2,334,988           |
| Hospitalizations for which CCR is available, n (%)            | 489724 (100%)    | 476605 (100%)    | 476728 (100%)    | 452724 (100%)    | 439207 (100%)    | 2334988 (100%)      |
| Total charges for hospitalizations for which CCR is available | \$13,927,214,520 | \$14,645,751,657 | \$15,247,598,300 | \$15,596,643,583 | \$15,003,967,132 | \$74,421,175,192    |
| Total costs for hospitalizations for which CCR is available   | \$4,343,898,209  | \$4,568,009,942  | \$4,755,725,910  | \$4,864,593,134  | \$5,001,131,977  | \$23,533,359,171    |
| Average CCR*                                                  | 0.3119           | 0.3119           | 0.3119           | 0.3119           | 0.3119           |                     |

\*Statewide constant CCR (0.3119) used to estimate the total cost across years.

| <b>Oklahoma (sensitivity analysis)</b>                       | <b>2010</b>      | <b>2011</b>      | <b>2012</b>      | <b>2013</b>      | <b>2014</b>      | <b>2010 to 2014</b> |
|--------------------------------------------------------------|------------------|------------------|------------------|------------------|------------------|---------------------|
| Total hospitalization, n                                     | 489,724          | 476,605          | 476,728          | 452,724          | 439,207          | 2,334,988           |
| Hospitalization for which CCR is available, n (%)            | 489724 (100%)    | 476605 (100%)    | 476728 (100%)    | 452724 (100%)    | 439207 (100%)    | 2334988 (100%)      |
| Total charges for hospitalization for which CCR is available | \$13,927,214,520 | \$14,645,751,657 | \$15,247,598,300 | \$15,596,643,583 | \$15,003,967,132 | \$74,421,175,192    |
| Total costs for hospitalization for which CCR is available   | \$4,337,630,962  | \$4,445,717,915  | \$4,413,417,328  | \$4,304,673,629  | \$4,267,557,794  | \$21,768,997,628    |
| Average CCR*                                                 | 0.3114           | 0.3036           | 0.2895           | 0.276            | 0.2662           |                     |

\*Average of the CCRs of New York and Colorado for any given state-year.

**eTable 2.** International Classification of Diseases-9<sup>th</sup> Edition (ICD-9) codes defining each medical diagnosis.

**Chronic pain**

| ICD-9 Code | Short Description        | Long Description                 |
|------------|--------------------------|----------------------------------|
| 338.21     | Chronic pain d/t trauma  | Chronic pain due to trauma       |
| 338.22     | Chron post-thoracot pain | Chronic post-thoracotomy pain    |
| 338.28     | Chronic postop pain NEC  | Other chronic postoperative pain |
| 338.29     | Chronic pain NEC         | Other chronic pain               |
| 338.4      | Chronic pain syndrome    | Chronic pain syndrome            |

**Nausea or vomiting**

| ICD-9 Code | Short Description    | Long Description     |
|------------|----------------------|----------------------|
| 787.03     | Vomiting alone       | Vomiting alone       |
| 787.02     | Nausea alone         | Nausea alone         |
| 787.01     | Nausea with vomiting | Nausea with vomiting |

**Spasticity**

| ICD-9 Code | Short Description | Long Description |
|------------|-------------------|------------------|
| 728.85     | Spasm of muscle   | Spasm of muscle  |

**Short-term sleep disorders**

| ICD-9 Code | Short Description        | Long Description                                         |
|------------|--------------------------|----------------------------------------------------------|
| 307.4      | Nonorganic sleep dis NOS | Nonorganic sleep disorder, unspecified                   |
| 307.41     | Transient insomnia       | Transient disorder of initiating or maintaining sleep    |
| 307.42     | Persistent insomnia      | Persistent disorder of initiating or maintaining sleep   |
| 307.45     | Nonorganic circadian rhy | Circadian rhythm sleep disorder of nonorganic origin     |
| 307.47     | Sleep stage dysfunc NEC  | Other dysfunctions of sleep stages or arousal from sleep |
| 307.49     | Nonorganic sleep dis NEC | Other specific disorders of sleep of nonorganic origin   |

**Increased appetite and weight gain**

| ICD-9 Code | Short Description    | Long Description     |
|------------|----------------------|----------------------|
| 783.1      | Abnormal weight gain | Abnormal weight gain |
| 783.6      | Polyphagia           | Polyphagia           |

**Tourette's syndrome**

| ICD-9 Code | Short Description   | Long Description    |
|------------|---------------------|---------------------|
| 307.23     | Tourette's disorder | Tourette's disorder |

**Posttraumatic stress disorder**

| ICD-9 Code | Short Description        | Long Description              |
|------------|--------------------------|-------------------------------|
| 309.81     | Posttraumatic stress dis | Posttraumatic stress disorder |

**Non-seminoma-type testicular germ cell cancer**

| ICD-9 Code | Short Description    | Long Description                                   |
|------------|----------------------|----------------------------------------------------|
| 186.9      | Malig neo testis NEC | Malignant neoplasm of other and unspecified testis |

**Acute myocardial infarction**

| ICD-9 Code | Short Description        | Long Description                                                                 |
|------------|--------------------------|----------------------------------------------------------------------------------|
| 410        | AMI anterolateral,unspec | Acute myocardial infarction of anterolateral wall, episode of care unspecified   |
| 410.01     | AMI anterolateral, init  | Acute myocardial infarction of anterolateral wall, initial episode of care       |
| 410.02     | AMI anterolateral,subseq | Acute myocardial infarction of anterolateral wall, subsequent episode of care    |
| 410.1      | AMI anterior wall,unspec | Acute myocardial infarction of other anterior wall, episode of care unspecified  |
| 410.11     | AMI anterior wall, init  | Acute myocardial infarction of other anterior wall, initial episode of care      |
| 410.12     | AMI anterior wall,subseq | Acute myocardial infarction of other anterior wall, subsequent episode of care   |
| 410.2      | AMI inferolateral,unspec | Acute myocardial infarction of inferolateral wall, episode of care unspecified   |
| 410.21     | AMI inferolateral, init  | Acute myocardial infarction of inferolateral wall, initial episode of care       |
| 410.22     | AMI inferolateral,subseq | Acute myocardial infarction of inferolateral wall, subsequent episode of care    |
| 410.3      | AMI inferopost, unspec   | Acute myocardial infarction of inferoposterior wall, episode of care unspecified |
| 410.31     | AMI inferopost, initial  | Acute myocardial infarction of inferoposterior wall, initial episode of care     |
| 410.32     | AMI inferopost, subseq   | Acute myocardial infarction of inferoposterior wall, subsequent episode of care  |
| 410.4      | AMI inferior wall,unspec | Acute myocardial infarction of other inferior wall, episode of care unspecified  |
| 410.41     | AMI inferior wall, init  | Acute myocardial infarction of other inferior wall, initial episode of care      |
| 410.42     | AMI inferior wall,subseq | Acute myocardial infarction of other inferior wall, subsequent episode of care   |
| 410.5      | AMI lateral NEC, unspec  | Acute myocardial infarction of other lateral wall, episode of care unspecified   |
| 410.51     | AMI lateral NEC, initial | Acute myocardial infarction of other lateral wall, initial episode of care       |
| 410.52     | AMI lateral NEC, subseq  | Acute myocardial infarction of other lateral wall, subsequent episode of care    |
| 410.6      | True post infarct,unspec | True posterior wall infarction, episode of care unspecified                      |
| 410.61     | True post infarct, init  | True posterior wall infarction, initial episode of care                          |

|        |                          |                                                                                   |
|--------|--------------------------|-----------------------------------------------------------------------------------|
| 410.62 | True post infarct,subseq | True posterior wall infarction, subsequent episode of care                        |
| 410.7  | Subendo infarct, unspec  | Subendocardial infarction, episode of care unspecified                            |
| 410.71 | Subendo infarct, initial | Subendocardial infarction, initial episode of care                                |
| 410.72 | Subendo infarct, subseq  | Subendocardial infarction, subsequent episode of care                             |
| 410.8  | AMI NEC, unspecified     | Acute myocardial infarction of other specified sites, episode of care unspecified |
| 410.81 | AMI NEC, initial         | Acute myocardial infarction of other specified sites, initial episode of care     |
| 410.82 | AMI NEC, subsequent      | Acute myocardial infarction of other specified sites, subsequent episode of care  |
| 410.9  | AMI NOS, unspecified     | Acute myocardial infarction of unspecified site, episode of care unspecified      |
| 410.91 | AMI NOS, initial         | Acute myocardial infarction of unspecified site, initial episode of care          |
| 410.92 | AMI NOS, subsequent      | Acute myocardial infarction of unspecified site, subsequent episode of care       |

**Ischemic stroke**

| ICD-9 Code | Short Description        | Long Description                                                                               |
|------------|--------------------------|------------------------------------------------------------------------------------------------|
| 435.8      | Trans cereb ischemia NEC | Other specified transient cerebral ischemias                                                   |
| 435.9      | Trans cereb ischemia NOS | Unspecified transient cerebral ischemia                                                        |
| 433.01     | Ocl bslr art w infrc     | Occlusion and stenosis of basilar artery with cerebral infarction                              |
| 433.11     | Ocl crtd art w infrc     | Occlusion and stenosis of carotid artery with cerebral infarction                              |
| 433.21     | Ocl vrtb art w infrc     | Occlusion and stenosis of vertebral artery with cerebral infarction                            |
| 433.31     | Ocl mlt bi art w infrc   | Occlusion and stenosis of multiple and bilateral precerebral arteries with cerebral infarction |
| 433.81     | Ocl spcf art w infrc     | Occlusion and stenosis of other specified precerebral artery with cerebral infarction          |
| 433.91     | Ocl art NOS w infrc      | Occlusion and stenosis of unspecified precerebral artery with cerebral infarction              |
| 434.91     | Crbl art ocl NOS w infrc | Cerebral artery occlusion, unspecified with cerebral infarction                                |

**Brain hemorrhage**

| ICD-9 Code | Short Description        | Long Description                    |
|------------|--------------------------|-------------------------------------|
| 430        | Subarachnoid hemorrhage  | Subarachnoid hemorrhage             |
| 431        | Intracerebral hemorrhage | Intracerebral hemorrhage            |
| 432        | Nontraum extradural hem  | Nontraumatic extradural hemorrhage  |
| 432.1      | Subdural hemorrhage      | Subdural hemorrhage                 |
| 432.9      | Intracranial hemorr NOS  | Unspecified intracranial hemorrhage |

**Metabolic syndrome and diabetes**

| ICD-9 Code | Short Description        | Long Description                                                                                           |
|------------|--------------------------|------------------------------------------------------------------------------------------------------------|
| 277.7      | Dysmetabolic syndrome x  | Dysmetabolic syndrome X                                                                                    |
| 250        | DMII wo cmp nt st uncntr | Diabetes mellitus without mention of complication, type II or unspecified type, not stated as uncontrolled |
| 250.02     | DMII wo cmp uncntrld     | Diabetes mellitus without mention of complication, type II or unspecified type, uncontrolled               |
| 250.1      | DMII keto nt st uncntrld | Diabetes with ketoacidosis, type II or unspecified type, not stated as uncontrolled                        |
| 250.12     | DMII ketoacd uncntrld    | Diabetes with ketoacidosis, type II or unspecified type, uncontrolled                                      |
| 250.2      | DMII hprsm nt st uncntrl | Diabetes with hyperosmolarity, type II or unspecified type, not stated as uncontrolled                     |
| 250.22     | DMII hprosmrlr uncntrld  | Diabetes with hyperosmolarity, type II or unspecified type, uncontrolled                                   |
| 250.3      | DMII o cm nt st uncntrld | Diabetes with other coma, type II or unspecified type, not stated as uncontrolled                          |
| 250.32     | DMII oth coma uncntrld   | Diabetes with other coma, type II or unspecified type, uncontrolled                                        |
| 250.4      | DMII renl nt st uncntrld | Diabetes with renal manifestations, type II or unspecified type, not stated as uncontrolled                |
| 250.42     | DMII renal uncntrld      | Diabetes with renal manifestations, type II or unspecified type, uncontrolled                              |
| 250.5      | DMII ophth nt st uncntrl | Diabetes with ophthalmic manifestations, type II or unspecified type, not stated as uncontrolled           |
| 250.52     | DMII ophth uncntrld      | Diabetes with ophthalmic manifestations, type II or unspecified type, uncontrolled                         |
| 250.6      | DMII neuro nt st uncntrl | Diabetes with neurological manifestations, type II or unspecified type, not stated as uncontrolled         |
| 250.62     | DMII neuro uncntrld      | Diabetes with neurological manifestations, type II or unspecified type, uncontrolled                       |
| 250.7      | DMII circ nt st uncntrld | Diabetes with peripheral circulatory disorders, type II or unspecified type, not stated as uncontrolled    |
| 250.72     | DMII circ uncntrld       | Diabetes with peripheral circulatory disorders, type II or unspecified type, uncontrolled                  |
| 250.8      | DMII oth nt st uncntrld  | Diabetes with other specified manifestations, type II or unspecified type, not stated as uncontrolled      |
| 250.82     | DMII oth uncntrld        | Diabetes with other specified manifestations, type II or unspecified type, uncontrolled                    |
| 250.9      | DMII unspf nt st uncntrl | Diabetes with unspecified complication, type II or unspecified type, not stated as uncontrolled            |



|        |                     |                                                                                   |
|--------|---------------------|-----------------------------------------------------------------------------------|
| 250.92 | DMII unspf uncntrld | Diabetes with unspecified complication, type II or unspecified type, uncontrolled |
|--------|---------------------|-----------------------------------------------------------------------------------|

**Prediabetes**

| ICD-9 Code | Short Description    | Long Description       |
|------------|----------------------|------------------------|
| 790.29     | Abnormal glucose NEC | Other abnormal glucose |

**Bronchitis**

| ICD-9 Code | Short Description        | Long Description                                         |
|------------|--------------------------|----------------------------------------------------------|
| 466        | Acute bronchitis         | Acute bronchitis                                         |
| 490        | Bronchitis NOS           | Bronchitis, not specified as acute or chronic            |
| 491        | Simple chr bronchitis    | Simple chronic bronchitis                                |
| 491.1      | Mucopurul chr bronchitis | Mucopurulent chronic bronchitis                          |
| 491.2      | Obst chr bronc w/o exac  | Obstructive chronic bronchitis without exacerbation      |
| 491.21     | Obs chr bronc w(ac) exac | Obstructive chronic bronchitis with (acute) exacerbation |
| 491.22     | Obs chr bronc w ac bronc | Obstructive chronic bronchitis with acute bronchitis     |
| 491.8      | Chronic bronchitis NEC   | Other chronic bronchitis                                 |
| 491.9      | Chronic bronchitis NOS   | Unspecified chronic bronchitis                           |

**Motor vehicle accidents**

| ICD-9 Code | Short Description       | Long Description                                                                                                                       |
|------------|-------------------------|----------------------------------------------------------------------------------------------------------------------------------------|
| E812.0     | Mv collision NOS-driver | Other motor vehicle traffic accident involving collision with motor vehicle injuring driver of motor vehicle other than motorcycle     |
| E812.1     | Mv collision NOS-pasngr | Other motor vehicle traffic accident involving collision with motor vehicle injuring passenger in motor vehicle other than motorcycle  |
| E812.2     | Mv collis NOS-motorcycl | Other motor vehicle traffic accident involving collision with motor vehicle injuring motorcyclist                                      |
| E812.3     | Mv coll NOS-mcycl psngr | Other motor vehicle traffic accident involving collision with motor vehicle injuring passenger on motorcycle                           |
| E812.4     | Mv collision NOS-st car | Other motor vehicle traffic accident involving collision with motor vehicle injuring occupant of streetcar                             |
| E812.5     | Mv coll NOS-anim rid    | Other motor vehicle traffic accident involving collision with motor vehicle injuring rider of animal; occupant of animal-drawn vehicle |
| E812.6     | Mv coll NOS-ped cycl    | Other motor vehicle traffic accident involving collision with motor vehicle injuring pedal cyclist                                     |
| E812.7     | Mv collision NOS-pedest | Other motor vehicle traffic accident involving collision with motor vehicle injuring pedestrian                                        |

|        |                          |                                                                                                                                  |
|--------|--------------------------|----------------------------------------------------------------------------------------------------------------------------------|
| E812.8 | Mv collis NOS-pers NEC   | Other motor vehicle traffic accident involving collision with motor vehicle injuring other specified person                      |
| E812.9 | Mv collis NOS-pers NOS   | Other motor vehicle traffic accident involving collision with motor vehicle injuring unspecified person                          |
| E813.0 | Mv-oth veh coll-driver   | Motor vehicle traffic accident involving collision with other vehicle injuring driver of motor vehicle other than motorcycle     |
| E813.1 | Mv-oth veh coll-pasngr   | Motor vehicle traffic accident involving collision with other vehicle injuring passenger in motor vehicle other than motorcycle  |
| E813.2 | Mv-oth veh coll-motcycl  | Motor vehicle traffic accident involving collision with other vehicle injuring motorcyclist                                      |
| E813.3 | Mv-oth veh coll-mcyc psg | Motor vehicle traffic accident involving collision with other vehicle injuring passenger on motorcycle                           |
| E813.4 | Mv-oth veh coll-st car   | Motor vehicle traffic accident involving collision with other vehicle injuring occupant of streetcar                             |
| E813.5 | Mv-oth veh coll-anim rid | Motor vehicle traffic accident involving collision with other vehicle injuring rider of animal; occupant of animal-drawn vehicle |
| E813.6 | Mv-oth veh coll-ped cycl | Motor vehicle traffic accident involving collision with other vehicle injuring pedal cyclist                                     |
| E813.7 | Mv-oth veh coll-pedest   | Motor vehicle traffic accident involving collision with other vehicle injuring pedestrian                                        |
| E813.8 | Mv-oth veh coll-pers NEC | Motor vehicle traffic accident involving collision with other vehicle injuring other specified person                            |
| E813.9 | Mv-oth veh coll-pers NOS | Motor vehicle traffic accident involving collision with other vehicle injuring unspecified person                                |
| E814.0 | Mv coll w pedest-driver  | Motor vehicle traffic accident involving collision with pedestrian injuring driver of motor vehicle other than motorcycle        |
| E814.1 | Mv coll w pedest-pasngr  | Motor vehicle traffic accident involving collision with pedestrian injuring passenger in motor vehicle other than motorcycle     |
| E814.2 | Mv coll w pedest-motcycl | Motor vehicle traffic accident involving collision with pedestrian injuring motorcyclist                                         |
| E814.3 | Mv coll w ped-mcycl psgr | Motor vehicle traffic accident involving collision with pedestrian injuring passenger on motorcycle                              |
| E814.4 | Mv coll w pedest-st car  | Motor vehicle traffic accident involving collision with pedestrian injuring occupant of streetcar                                |
| E814.5 | Mv coll w ped-anim rid   | Motor vehicle traffic accident involving collision with pedestrian injuring rider of animal; occupant of animal drawn vehicle    |
| E814.6 | Mv coll w ped-ped cycl   | Motor vehicle traffic accident involving collision with pedestrian injuring pedal cyclist                                        |

|        |                          |                                                                                                                                                    |
|--------|--------------------------|----------------------------------------------------------------------------------------------------------------------------------------------------|
| E814.7 | Mv coll w pedest-pedest  | Motor vehicle traffic accident involving collision with pedestrian injuring pedestrian                                                             |
| E814.8 | Mv coll w pedes-pers NEC | Motor vehicle traffic accident involving collision with pedestrian injuring other specified person                                                 |
| E814.9 | Mv coll w pedes-pers NOS | Motor vehicle traffic accident involving collision with pedestrian injuring unspecified person                                                     |
| E815.0 | Mv coll w oth obj-driver | Other motor vehicle traffic accident involving collision on the highway injuring driver of motor vehicle other than motorcycle                     |
| E815.1 | Mv coll w oth obj-pasngr | Other motor vehicle traffic accident involving collision on the highway injuring passenger in motor vehicle other than motorcycle                  |
| E815.2 | Mv coll w oth obj-mocycl | Other motor vehicle traffic accident involving collision on the highway injuring motorcyclist                                                      |
| E815.3 | Mv coll w obj-mcycl psgr | Other motor vehicle traffic accident involving collision on the highway injuring passenger on motorcycle                                           |
| E815.4 | Mv coll w obj-st car     | Other motor vehicle traffic accident involving collision on the highway injuring occupant of streetcar                                             |
| E815.5 | Mv coll w obj-anim rider | Other motor vehicle traffic accident involving collision on the highway injuring rider of animal; occupant of animal-drawn vehicle                 |
| E815.6 | Mv coll w obj-ped cycl   | Other motor vehicle traffic accident involving collision on the highway injuring pedal cyclist                                                     |
| E815.7 | Mv coll w obj-pedest     | Other motor vehicle traffic accident involving collision on the highway injuring pedestrian                                                        |
| E815.8 | Mv coll w obj-pers NEC   | Other motor vehicle traffic accident involving collision on the highway injuring other specified person                                            |
| E815.9 | Mv coll w obj-pers NOS   | Other motor vehicle traffic accident involving collision on the highway injuring unspecified person                                                |
| E816.0 | Loss control mv acc-driv | Motor vehicle traffic accident due to loss of control, without collision on the highway, injuring driver of motor vehicle other than motorcycle    |
| E816.1 | Loss control mv acc-psgr | Motor vehicle traffic accident due to loss of control, without collision on the highway, injuring passenger in motor vehicle other than motorcycle |
| E816.2 | Loss control mv-mocycl   | Motor vehicle traffic accident due to loss of control, without collision on the highway, injuring motorcyclist                                     |
| E816.3 | Loss control mv-mcyc psg | Motor vehicle traffic accident due to loss of control, without collision on the highway, injuring passenger on motorcycle                          |

|        |                          |                                                                                                                                                     |
|--------|--------------------------|-----------------------------------------------------------------------------------------------------------------------------------------------------|
| E816.4 | Loss cont mv acc-st car  | Motor vehicle traffic accident due to loss of control, without collision on the highway, injuring occupant of streetcar                             |
| E816.5 | Loss cont mv-anim rider  | Motor vehicle traffic accident due to loss of control, without collision on the highway, injuring rider of animal; occupant of animal-drawn vehicle |
| E816.6 | Loss control mv-ped cycl | Motor vehicle traffic accident due to loss of control, without collision on the highway, injuring pedal cyclist                                     |
| E816.7 | Loss control mv-pedest   | Motor vehicle traffic accident due to loss of control, without collision on the highway, injuring pedestrian                                        |
| E816.8 | Loss control mv-pers NEC | Motor vehicle traffic accident due to loss of control, without collision on the highway, injuring other specified person                            |
| E816.9 | Loss control mv-pers NOS | Motor vehicle traffic accident due to loss of control, without collision on the highway, injuring unspecified person                                |
| E819.0 | Traffic acc NOS-driver   | Motor vehicle traffic accident of unspecified nature injuring driver of motor vehicle other than motorcycle                                         |
| E819.1 | Traffic acc NOS-pasngr   | Motor vehicle traffic accident of unspecified nature injuring passenger in motor vehicle other than motorcycle                                      |
| E819.2 | Traffic acc NOS-motcycl  | Motor vehicle traffic accident of unspecified nature injuring motorcyclist                                                                          |
| E819.3 | Traff acc NOS-mcycl psgr | Motor vehicle traffic accident of unspecified nature injuring passenger on motorcycle                                                               |
| E819.4 | Traffic acc NOS-st car   | Motor vehicle traffic accident of unspecified nature injuring occupant of streetcar                                                                 |
| E819.5 | Traff acc NOS-anim rider | Motor vehicle traffic accident of unspecified nature injuring rider of animal; occupant of animal-drawn vehicle                                     |
| E819.6 | Traffic acc NOS-ped cycl | Motor vehicle traffic accident of unspecified nature injuring pedal cyclist                                                                         |
| E819.7 | Traffic acc NOS-pedest   | Motor vehicle traffic accident of unspecified nature injuring pedestrian                                                                            |
| E819.8 | Traffic acc NOS-pers NEC | Motor vehicle traffic accident of unspecified nature injuring other specified person                                                                |
| E819.9 | Traffic acc NOS-pers NOS | Motor vehicle traffic accident of unspecified nature injuring unspecified person                                                                    |

**Overdose injuries**

| ICD-9 Code | Short Description | Long Description                                                                     |
|------------|-------------------|--------------------------------------------------------------------------------------|
| E950.0     | Poison-analgesics | Suicide and self-inflicted poisoning by analgesics, antipyretics, and antirheumatics |

|        |                         |                                                                                        |
|--------|-------------------------|----------------------------------------------------------------------------------------|
| E950.1 | Poison-barbiturates     | Suicide and self-inflicted poisoning by barbiturates                                   |
| E950.2 | Poison-sedat/hypnotic   | Suicide and self-inflicted poisoning by other sedatives and hypnotics                  |
| E950.3 | Poison-psychotropic agt | Suicide and self-inflicted poisoning by tranquilizers and other psychotropic agents    |
| E950.4 | Poison-drug/medicin NEC | Suicide and self-inflicted poisoning by other specified drugs and medicinal substances |
| E950.5 | Poison-drug/medicin NOS | Suicide and self-inflicted poisoning by unspecified drug or medicinal substance        |

**Assault-based gunshot injuries**

| ICD-9 Code | Short Description       | Long Description                         |
|------------|-------------------------|------------------------------------------|
| E965.0     | Assault-handgun         | Assault by handgun                       |
| E965.1     | Assault-shotgun         | Assault by shotgun                       |
| E965.2     | Assault-hunting rifle   | Assault by hunting rifle                 |
| E965.3     | Assault-military weapon | Assault by military firearms             |
| E965.4     | Assault-firearm NEC     | Assault by other and unspecified firearm |

**Low offspring birthweight**

| ICD-9 Code | Short Description        | Long Description                                            |
|------------|--------------------------|-------------------------------------------------------------|
| 764.9      | Fet growth retard wtNOS  | Fetal growth retardation, unspecified, unspecified [weight] |
| 764.91     | Fet growth retard <500g  | Fetal growth retardation, unspecified, less than 500 grams  |
| 764.92     | Fet growth ret 500-749g  | Fetal growth retardation, unspecified, 500-749 grams        |
| 764.93     | Fet growth ret 750-999g  | Fetal growth retardation, unspecified, 750-999 grams        |
| 764.94     | Fet grwth ret 1000-1249g | Fetal growth retardation, unspecified, 1,000-1,249 grams    |
| 764.95     | Fet grwth ret 1250-1499g | Fetal growth retardation, unspecified, 1,250-1,499 grams    |
| 764.96     | Fet grwth ret 1500-1749g | Fetal growth retardation, unspecified, 1,500-1,749 grams    |
| 764.97     | Fet grwth ret 1750-1999g | Fetal growth retardation, unspecified, 1,750-1,999 grams    |
| 764.98     | Fet grwth ret 2000-2499g | Fetal growth retardation, unspecified, 2,000-2,499 grams    |
| 764.99     | Fet growth ret 2500+g    | Fetal growth retardation, unspecified, 2,500 grams and over |

**Maternal pregnancy complications**

| ICD-9 Code | Short Description       | Long Description                                                                                   |
|------------|-------------------------|----------------------------------------------------------------------------------------------------|
| 640.8      | Hem early preg NEC-unsp | Other specified hemorrhage in early pregnancy, unspecified as to episode of care or not applicable |

|        |                           |                                                                                                                                                  |
|--------|---------------------------|--------------------------------------------------------------------------------------------------------------------------------------------------|
| 640.81 | Hem early preg NEC-deliv  | Other specified hemorrhage in early pregnancy, delivered, with or without mention of antepartum condition                                        |
| 640.83 | Hem early pg NEC-anteapar | Other specified hemorrhage in early pregnancy, antepartum condition or complication                                                              |
| 640.9  | Hemorr early preg-unspec  | Unspecified hemorrhage in early pregnancy, unspecified as to episode of care or not applicable                                                   |
| 640.91 | Hem early preg-delivered  | Unspecified hemorrhage in early pregnancy, delivered, with or without mention of antepartum condition                                            |
| 640.93 | Hem early preg-anteapart  | Unspecified hemorrhage in early pregnancy, antepartum condition or complication                                                                  |
| 641    | Placenta previa-unspec    | Placenta previa without hemorrhage, unspecified as to episode of care or not applicable                                                          |
| 641.01 | Placenta previa-deliver   | Placenta previa without hemorrhage, delivered, with or without mention of antepartum condition                                                   |
| 641.03 | Placenta previa-anteapart | Placenta previa without hemorrhage, antepartum condition or complication                                                                         |
| 641.1  | Placenta prev hem-unspec  | Hemorrhage from placenta previa, unspecified as to episode of care or not applicable                                                             |
| 641.11 | Placenta prev hem-deliv   | Hemorrhage from placenta previa, delivered, with or without mention of antepartum condition                                                      |
| 641.13 | Placen prev hem-anteapart | Hemorrhage from placenta previa, antepartum condition or complication                                                                            |
| 641.2  | Prem separ placen-unspec  | Premature separation of placenta, unspecified as to episode of care or not applicable                                                            |
| 641.21 | Prem separ placen-deliv   | Premature separation of placenta, delivered, with or without mention of antepartum condition                                                     |
| 641.23 | Prem separ plac-anteapart | Premature separation of placenta, antepartum condition or complication                                                                           |
| 642    | Essen hyperten preg-unsp  | Benign essential hypertension complicating pregnancy, childbirth, and the puerperium, unspecified as to episode of care or not applicable        |
| 642.01 | Essen hyperten-delivered  | Benign essential hypertension complicating pregnancy, childbirth, and the puerperium, delivered, with or without mention of antepartum condition |
| 642.02 | Essen hyperten-del w p/p  | Benign essential hypertension, complicating pregnancy, childbirth, and the puerperium, delivered, with mention of postpartum complication        |
| 642.03 | Essen hyperten-anteapart  | Benign essential hypertension complicating pregnancy, childbirth, and the puerperium, antepartum condition or complication                       |



|        |                          |                                                                                                                                  |
|--------|--------------------------|----------------------------------------------------------------------------------------------------------------------------------|
| 642.04 | Essen hyperten-postpart  | Benign essential hypertension complicating pregnancy, childbirth, and the puerperium, postpartum condition or complication       |
| 642.3  | Trans hyperten preg-unsp | Transient hypertension of pregnancy, unspecified as to episode of care or not applicable                                         |
| 642.31 | Trans hyperten-delivered | Transient hypertension of pregnancy, delivered , with or without mention of antepartum condition                                 |
| 642.32 | Trans hyperten-del w p/p | Transient hypertension of pregnancy, delivered, with mention of postpartum complication                                          |
| 642.33 | Trans hyperten-antepart  | Transient hypertension of pregnancy, antepartum condition or complication                                                        |
| 642.34 | Trans hyperten-postpart  | Transient hypertension of pregnancy, postpartum condition or complication                                                        |
| 642.4  | Mild/NOS preeclamp-unsp  | Mild or unspecified pre-eclampsia, unspecified as to episode of care or not applicable                                           |
| 642.41 | Mild/NOS preeclamp-deliv | Mild or unspecified pre-eclampsia, delivered, with or without mention of antepartum condition                                    |
| 642.42 | Mild preeclamp-del w p/p | Mild or unspecified pre-eclampsia, delivered, with mention of postpartum complication                                            |
| 642.43 | Mild/NOS preeclamp-antep | Mild or unspecified pre-eclampsia, antepartum condition or complication                                                          |
| 642.44 | Mild/NOS preeclamp-p/p   | Mild or unspecified pre-eclampsia, postpartum condition or complication                                                          |
| 642.5  | Severe preeclamp-unspec  | Severe pre-eclampsia, unspecified as to episode of care or not applicable                                                        |
| 642.51 | Severe preeclamp-deliver | Severe pre-eclampsia, delivered, with or without mention of antepartum condition                                                 |
| 642.52 | Sev preeclamp-del w p/p  | Severe pre-eclampsia, delivered, with mention of postpartum complication                                                         |
| 642.53 | Sev preeclamp-antepartum | Severe pre-eclampsia, antepartum condition or complication                                                                       |
| 642.54 | Sev preeclamp-postpartum | Severe pre-eclampsia, postpartum condition or complication                                                                       |
| 642.6  | Eclampsia-unspecified    | Eclampsia, unspecified as to episode of care or not applicable                                                                   |
| 642.61 | Eclampsia-delivered      | Eclampsia, delivered, with or without mention of antepartum condition                                                            |
| 642.62 | Eclampsia-deliv w p/p    | Eclampsia, delivered, with mention of postpartum complication                                                                    |
| 642.63 | Eclampsia-antepartum     | Eclampsia, antepartum condition or complication                                                                                  |
| 642.64 | Eclampsia-postpartum     | Eclampsia, postpartum condition or complication                                                                                  |
| 642.7  | Tox w old hyperten-unsp  | Pre-eclampsia or eclampsia superimposed on pre-existing hypertension, unspecified as to episode of care or not applicable        |
| 642.71 | Tox w old hyperten-deliv | Pre-eclampsia or eclampsia superimposed on pre-existing hypertension, delivered, with or without mention of antepartum condition |

|        |                           |                                                                                                                                            |
|--------|---------------------------|--------------------------------------------------------------------------------------------------------------------------------------------|
| 642.72 | Tox w old hyp-del w p/p   | Pre-eclampsia or eclampsia superimposed on pre-existing hypertension, delivered, with mention of postpartum complication                   |
| 642.73 | Tox w old hyper-ante part | Pre-eclampsia or eclampsia superimposed on pre-existing hypertension, antepartum condition or complication                                 |
| 642.74 | Tox w old hyper-postpart  | Pre-eclampsia or eclampsia superimposed on pre-existing hypertension, postpartum condition or complication                                 |
| 642.9  | Hyperten preg NOS-unspec  | Unspecified hypertension complicating pregnancy, childbirth, or the puerperium, unspecified as to episode of care or not applicable        |
| 642.91 | Hypertens NOS-delivered   | Unspecified hypertension complicating pregnancy, childbirth, or the puerperium, delivered, with or without mention of antepartum condition |
| 642.92 | Hypertens NOS-del w p/p   | Unspecified hypertension complicating pregnancy, childbirth, or the puerperium, delivered, with mention of postpartum complication         |
| 642.93 | Hypertens NOS-ante partum | Unspecified hypertension complicating pregnancy, childbirth, or the puerperium, antepartum condition or complication                       |
| 642.94 | Hypertens NOS-postpartum  | Unspecified hypertension complicating pregnancy, childbirth, or the puerperium, postpartum condition or complication                       |
| 646.8  | Preg compl NEC-unspec     | Other specified complications of pregnancy, unspecified as to episode of care or not applicable                                            |
| 646.81 | Preg compl NEC-delivered  | Other specified complications of pregnancy, delivered, with or without mention of antepartum condition                                     |
| 646.82 | Preg compl NEC-del w p/p  | Other specified complications of pregnancy, delivered, with mention of postpartum complication                                             |
| 646.83 | Preg compl NEC-ante part  | Other specified complications of pregnancy, antepartum condition or complication                                                           |
| 646.84 | Preg compl NEC-postpart   | Other specified complications of pregnancy, postpartum condition or complication                                                           |
| 646.9  | Preg compl NOS-unspec     | Unspecified complication of pregnancy, unspecified as to episode of care or not applicable                                                 |

**Unemployment or low income**

| ICD-9 Code | Short Description | Long Description |
|------------|-------------------|------------------|
| V62.0      | Unemployment      | Unemployment     |



**Schizophrenia or other psychoses**

| ICD-9 Code | Short Description        | Long Description                                                    |
|------------|--------------------------|---------------------------------------------------------------------|
| 295        | Simpl schizophren-unspec | Simple type schizophrenia, unspecified                              |
| 295.01     | Simpl schizophren-subchr | Simple type schizophrenia, subchronic                               |
| 295.02     | Simple schizophren-chr   | Simple type schizophrenia, chronic                                  |
| 295.03     | Simp schiz-subchr/exacer | Simple type schizophrenia, subchronic with acute exacerbation       |
| 295.04     | Simpl schizo-chr/exacerb | Simple type schizophrenia, chronic with acute exacerbation          |
| 295.05     | Simpl schizophren-remiss | Simple type schizophrenia, in remission                             |
| 295.1      | Hebephrenia-unspec       | Disorganized type schizophrenia, unspecified                        |
| 295.11     | Hebephrenia-subchronic   | Disorganized type schizophrenia, subchronic                         |
| 295.12     | Hebephrenia-chronic      | Disorganized type schizophrenia, chronic                            |
| 295.13     | Hebephren-subchr/exacerb | Disorganized type schizophrenia, subchronic with acute exacerbation |
| 295.14     | Hebephrenia-chr/exacerb  | Disorganized type schizophrenia, chronic with acute exacerbation    |
| 295.15     | Hebephrenia-remission    | Disorganized type schizophrenia, in remission                       |
| 295.2      | Catatonia-unspec         | Catatonic type schizophrenia, unspecified                           |
| 295.21     | Catatonia-subchronic     | Catatonic type schizophrenia, subchronic                            |
| 295.22     | Catatonia-chronic        | Catatonic type schizophrenia, chronic                               |
| 295.23     | Catatonia-subchr/exacerb | Catatonic type schizophrenia, subchronic with acute exacerbation    |
| 295.24     | Catatonia-chr/exacerb    | Catatonic type schizophrenia, chronic with acute exacerbation       |
| 295.25     | Catatonia-remission      | Catatonic type schizophrenia, in remission                          |
| 295.3      | Paranoid schizo-unspec   | Paranoid type schizophrenia, unspecified                            |
| 295.31     | Paranoid schizo-subchr   | Paranoid type schizophrenia, subchronic                             |
| 295.32     | Paranoid schizo-chronic  | Paranoid type schizophrenia, chronic                                |
| 295.33     | Paran schizo-subchr/exac | Paranoid type schizophrenia, subchronic with acute exacerbation     |
| 295.34     | Paran schizo-chr/exacerb | Paranoid type schizophrenia, chronic with acute exacerbation        |
| 295.35     | Paranoid schizo-remiss   | Paranoid type schizophrenia, in remission                           |
| 295.4      | Schizophreniform dis NOS | Schizophreniform disorder, unspecified                              |
| 295.41     | Schizophrenic dis-subchr | Schizophreniform disorder, subchronic                               |
| 295.42     | Schizophren dis-chronic  | Schizophreniform disorder, chronic                                  |
| 295.43     | Schizo dis-subchr/exacer | Schizophreniform disorder, subchronic with acute exacerbation       |
| 295.44     | Schizophr dis-chr/exacer | Schizophreniform disorder, chronic with acute exacerbation          |
| 295.45     | Schizophrenic dis-remiss | Schizophreniform disorder, in remission                             |
| 295.5      | Latent schizophren-unsp  | Latent schizophrenia, unspecified                                   |
| 295.51     | Lat schizophren-subchr   | Latent schizophrenia, subchronic                                    |
| 295.52     | Latent schizophren-chr   | Latent schizophrenia, chronic                                       |

|        |                           |                                                                                                       |
|--------|---------------------------|-------------------------------------------------------------------------------------------------------|
| 295.53 | Lat schizo-subchr/exacer  | Latent schizophrenia, subchronic with acute exacerbation                                              |
| 295.54 | Latent schizo-chr/exacer  | Latent schizophrenia, chronic with acute exacerbation                                                 |
| 295.55 | Lat schizophren-remiss    | Latent schizophrenia, in remission                                                                    |
| 295.6  | Schizophr dis resid NOS   | Schizophrenic disorders, residual type, unspecified                                                   |
| 295.61 | Schizophr dis resid-subch | Schizophrenic disorders, residual type, subchronic                                                    |
| 295.62 | Schizophr dis resid-chr   | Schizophrenic disorders, residual type, chronic                                                       |
| 295.63 | Schizo resid subchr/exac  | Schizophrenic disorders, residual type, subchronic with acute exacerbation                            |
| 295.64 | Schizophr resid-chro/exac | Schizophrenic disorders, residual type, chronic with acute exacerbation                               |
| 295.65 | Schizophr dis resid-remis | Schizophrenic disorders, residual type, in remission                                                  |
| 296.2  | Depress psychosis-unspec  | Major depressive affective disorder, single episode, unspecified                                      |
| 296.21 | Depress psychosis-mild    | Major depressive affective disorder, single episode, mild                                             |
| 296.22 | Depressive psychosis-mod  | Major depressive affective disorder, single episode, moderate                                         |
| 296.23 | Depress psychosis-severe  | Major depressive affective disorder, single episode, severe, without mention of psychotic behavior    |
| 296.24 | Depr psychos-sev w psych  | Major depressive affective disorder, single episode, severe, specified as with psychotic behavior     |
| 296.25 | Depr psychos-part remiss  | Major depressive affective disorder, single episode, in partial or unspecified remission              |
| 296.26 | Depr psychos-full remiss  | Major depressive affective disorder, single episode, in full remission                                |
| 296.3  | Recurr depr psychos-unsp  | Major depressive affective disorder, recurrent episode, unspecified                                   |
| 296.31 | Recurr depr psychos-mild  | Major depressive affective disorder, recurrent episode, mild                                          |
| 296.32 | Recurr depr psychos-mod   | Major depressive affective disorder, recurrent episode, moderate                                      |
| 296.33 | Recur depr psych-severe   | Major depressive affective disorder, recurrent episode, severe, without mention of psychotic behavior |
| 296.34 | Rec depr psych-psychotic  | Major depressive affective disorder, recurrent episode, severe, specified as with psychotic behavior  |
| 296.35 | Recur depr psyc-part rem  | Major depressive affective disorder, recurrent episode, in partial or unspecified remission           |

|        |                          |                                                                           |
|--------|--------------------------|---------------------------------------------------------------------------|
| 296.36 | Recur depr psyc-full rem | Major depressive affective disorder, recurrent episode, in full remission |
| 298    | React depress psychosis  | Depressive type psychosis                                                 |
| 298.1  | Excitativ type psychosis | Excitative type psychosis                                                 |
| 298.4  | Psychogen paranoid psych | Psychogenic paranoid psychosis                                            |
| 298.8  | React psychosis NEC/NOS  | Other and unspecified reactive psychosis                                  |
| 298.9  | Psychosis NOS            | Unspecified psychosis                                                     |

### Depressive disorders

| ICD-9 Code | Short Description       | Long Description                              |
|------------|-------------------------|-----------------------------------------------|
| 296.82     | Atypical depressive dis | Atypical depressive disorder                  |
| 311        | Depressive disorder NEC | Depressive disorder, not elsewhere classified |

### Suicide

| ICD-9 Code | Short Description       | Long Description                                                                                                                                       |
|------------|-------------------------|--------------------------------------------------------------------------------------------------------------------------------------------------------|
| E950.6     | Poison-agricult agent   | Suicide and self-inflicted poisoning by agricultural and horticultural chemical and pharmaceutical preparations other than plant foods and fertilizers |
| E950.7     | Poison-corrosiv/caustic | Suicide and self-inflicted poisoning by corrosive and caustic substances                                                                               |
| E950.8     | Poison-arsenic          | Suicide and self-inflicted poisoning by arsenic and its compounds                                                                                      |
| E950.9     | Poison-solid/liquid NEC | Suicide and self-inflicted poisoning by other and unspecified solid and liquid substances                                                              |
| E951.0     | Poison-piped gas        | Suicide and self-inflicted poisoning by gas distributed by pipeline                                                                                    |
| E951.1     | Poison-gas in container | Suicide and self-inflicted poisoning by liquefied petroleum gas distributed in mobile containers                                                       |
| E951.8     | Poison-utility gas NEC  | Suicide and self-inflicted poisoning by other utility gas                                                                                              |
| E952.0     | Poison-exhaust gas      | Suicide and self-inflicted poisoning by motor vehicle exhaust gas                                                                                      |
| E952.1     | Poison-co NEC           | Suicide and self-inflicted poisoning by other carbon monoxide                                                                                          |
| E952.8     | Poison-gas/vapor NEC    | Suicide and self-inflicted poisoning by other specified gases and vapors                                                                               |
| E952.9     | Poison-gas/vapor NOS    | Suicide and self-inflicted poisoning by unspecified gases and vapors                                                                                   |
| E953.0     | Injury-hanging          | Suicide and self-inflicted injury by hanging                                                                                                           |
| E953.1     | Injury-suff w plas bag  | Suicide and self-inflicted injury by suffocation by plastic bag                                                                                        |
| E953.8     | Injury-strang/suff NEC  | Suicide and self-inflicted injury by other specified means                                                                                             |
| E953.9     | Injury-strang/suff NOS  | Suicide and self-inflicted injury by unspecified means                                                                                                 |

|        |                          |                                                                               |
|--------|--------------------------|-------------------------------------------------------------------------------|
| E954.  | Injury-submersion        | Suicide and self-inflicted injury by submersion [drowning]                    |
| E955.0 | Injury-handgun           | Suicide and self-inflicted injury by handgun                                  |
| E955.1 | Injury-shotgun           | Suicide and self-inflicted injury by shotgun                                  |
| E955.2 | Injury-hunting rifle     | Suicide and self-inflicted injury by hunting rifle                            |
| E955.3 | Injury-military firearm  | Suicide and self-inflicted injury by military firearms                        |
| E955.4 | Injury-firearm NEC       | Suicide and self-inflicted injury by other and unspecified firearm            |
| E955.5 | Injury-explosives        | Suicide and self-inflicted injury by explosives                               |
| E955.6 | Self inflict acc-air gun | Suicide and self-inflicted injury by air gun                                  |
| E955.7 | Self inj-paintball gun   | Suicide and self-inflicted injury by paintball gun                            |
| E955.9 | Injury-firearm/expl NOS  | Suicide and self-inflicted injury by firearms and explosives, unspecified     |
| E956.  | Injury-cut instrument    | Suicide and self-inflicted injury by cutting and piercing instrument          |
| E957.0 | Injury-jump fm residence | Suicide and self-inflicted injuries by jumping from residential premises      |
| E957.1 | Injury-jump fm struc NEC | Suicide and self-inflicted injuries by jumping from other man-made structures |
| E957.2 | Injury-jump fm natur sit | Suicide and self-inflicted injuries by jumping from natural sites             |
| E957.9 | Injury-jump NEC          | Suicide and self-inflicted injuries by jumping from unspecified site          |
| E958.0 | Injury-moving object     | Suicide and self-inflicted injury by jumping or lying before moving object    |
| E958.1 | Injury-burn, fire        | Suicide and self-inflicted injury by burns, fire                              |
| E958.2 | Injury-scald             | Suicide and self-inflicted injury by scald                                    |
| E958.3 | Injury-extreme cold      | Suicide and self-inflicted injury by extremes of cold                         |
| E958.4 | Injury-electrocution     | Suicide and self-inflicted injury by electrocution                            |
| E958.5 | Injury-motor veh crash   | Suicide and self-inflicted injury by crashing of motor vehicle                |
| E958.6 | Injury-aircraft crash    | Suicide and self-inflicted injury by crashing of aircraft                     |
| E958.7 | Injury-caustic substance | Suicide and self-inflicted injury by caustic substances, except poisoning     |
| E958.8 | Injury-NEC               | Suicide and self-inflicted injury by other specified means                    |
| E958.9 | Injury-NOS               | Suicide and self-inflicted injury by unspecified means                        |

### Social anxiety disorder

| ICD-9 Code | Short Description | Long Description |
|------------|-------------------|------------------|
| 300.23     | Social phobia     | Social phobia    |

**Anxiety disorders**

| ICD-9 Code | Short Description        | Long Description                                    |
|------------|--------------------------|-----------------------------------------------------|
| 293.84     | Anxiety disorder oth dis | Anxiety disorder in conditions classified elsewhere |
| 300        | Anxiety state NOS        | Anxiety state, unspecified                          |

**Anxiety disorders (except social anxiety)**

| ICD-9 Code | Short Description         | Long Description                                                        |
|------------|---------------------------|-------------------------------------------------------------------------|
| 300.01     | Panic dis w/o agorophobia | Panic disorder without agorophobia                                      |
| 300.02     | Generalized anxiety dis   | Generalized anxiety disorder                                            |
| 300.09     | Anxiety state NEC         | Other anxiety states                                                    |
| 300.1      | Hysteria NOS              | Hysteria, unspecified                                                   |
| 300.11     | Conversion disorder       | Conversion disorder                                                     |
| 300.12     | Dissociative amnesia      | Dissociative amnesia                                                    |
| 300.13     | Dissociative fugue        | Dissociative fugue                                                      |
| 300.14     | Dissociative identity dis | Dissociative identity disorder                                          |
| 300.15     | Dissociative react NOS    | Dissociative disorder or reaction, unspecified                          |
| 300.16     | Factitious dis w symptom  | Factitious disorder with predominantly psychological signs and symptoms |
| 300.19     | Factitious ill NEC/NOS    | Other and unspecified factitious illness                                |
| 300.2      | Phobia NOS                | Phobia, unspecified                                                     |
| 300.21     | Agoraphobia w panic dis   | Agoraphobia with panic disorder                                         |
| 300.22     | Agoraphobia w/o panic     | Agoraphobia without mention of panic attacks                            |
| 300.29     | Isolated/spec phobia NEC  | Other isolated or specific phobias                                      |
| 300.3      | Obsessive-compulsive dis  | Obsessive-compulsive disorders                                          |
| 300.4      | Dysthymic disorder        | Dysthymic disorder                                                      |
| 300.5      | Neurasthenia              | Neurasthenia                                                            |
| 300.6      | Depersonalization disord  | Depersonalization disorder                                              |
| 300.7      | Hypochondriasis           | Hypochondriasis                                                         |
| 300.81     | Somatization disorder     | Somatization disorder                                                   |
| 300.82     | Undiff somatoform disrd   | Undifferentiated somatoform disorder                                    |
| 300.89     | Somatoform disorders NEC  | Other somatoform disorders                                              |
| 300.9      | Nonpsychotic disord NOS   | Unspecified nonpsychotic mental disorder                                |

**Positive symptoms of schizophrenia (i.e., hallucinations)**

| ICD-9 Code | Short Description       | Long Description                                                     |
|------------|-------------------------|----------------------------------------------------------------------|
| 780.1      | Hallucinations          |                                                                      |
| 293.81     | Psy dis w delus oth dis | Psychotic disorder with delusions in conditions classified elsewhere |
| 333.99     | Extrapyramidal dis NEC  | Other extrapyramidal diseases and abnormal movement disorders        |

**Bipolar disorders**

| ICD-9 Code | Short Description      | Long Description                                                            |
|------------|------------------------|-----------------------------------------------------------------------------|
| 296.5      | Bipol I cur depres NOS | Bipolar I disorder, most recent episode (or current) depressed, unspecified |

|        |                           |                                                                                                               |
|--------|---------------------------|---------------------------------------------------------------------------------------------------------------|
| 296.51 | Bipol I cur depress-mild  | Bipolar I disorder, most recent episode (or current) depressed, mild                                          |
| 296.52 | Bipol I cur depress-mod   | Bipolar I disorder, most recent episode (or current) depressed, moderate                                      |
| 296.53 | Bipol I curr dep w/o psy  | Bipolar I disorder, most recent episode (or current) depressed, severe, without mention of psychotic behavior |
| 296.54 | Bipol I currnt dep w psy  | Bipolar I disorder, most recent episode (or current) depressed, severe, specified as with psychotic behavior  |
| 296.55 | Bipol I cur dep rem NOS   | Bipolar I disorder, most recent episode (or current) depressed, in partial or unspecified remission           |
| 296.56 | Bipol I currnt dep remis  | Bipolar I disorder, most recent episode (or current) depressed, in full remission                             |
| 296.6  | Bipol I currnt mixed NOS  | Bipolar I disorder, most recent episode (or current) mixed, unspecified                                       |
| 296.61 | Bipol I currnt mix-mild   | Bipolar I disorder, most recent episode (or current) mixed, mild                                              |
| 296.62 | Bipol I currnt mixed-mod  | Bipolar I disorder, most recent episode (or current) mixed, moderate                                          |
| 296.63 | Bipol I cur mix w/o psy   | Bipolar I disorder, most recent episode (or current) mixed, severe, without mention of psychotic behavior     |
| 296.64 | Bipol I cur mixed w psy   | Bipolar I disorder, most recent episode (or current) mixed, severe, specified as with psychotic behavior      |
| 296.65 | Bipol I cur mix-part rem  | Bipolar I disorder, most recent episode (or current) mixed, in partial or unspecified remission               |
| 296.66 | Bipol I cur mixed remiss  | Bipolar I disorder, most recent episode (or current) mixed, in full remission                                 |
| 296.7  | Bipolar I current NOS     | Bipolar I disorder, most recent episode (or current) unspecified                                              |
| 296.8  | Bipolar disorder NOS      | Bipolar disorder, unspecified                                                                                 |
| 296    | Bipol I single manic NOS  | Bipolar I disorder, single manic episode, unspecified                                                         |
| 296.01 | Bipol I single manic-mild | Bipolar I disorder, single manic episode, mild                                                                |
| 296.02 | Bipol I single manic-mod  | Bipolar I disorder, single manic episode, moderate                                                            |
| 296.03 | Bipol I sing-sev w/o psy  | Bipolar I disorder, single manic episode, severe, without mention of psychotic behavior                       |
| 296.04 | Bipo I sin man-sev w psy  | Bipolar I disorder, single manic episode, severe, specified as with psychotic behavior                        |
| 296.05 | Bipol I sing man rem NOS  | Bipolar I disorder, single manic episode, in partial or unspecified remission                                 |
| 296.06 | Bipol I single manic rem  | Bipolar I disorder, single manic episode, in full remission                                                   |



|        |                           |                                                                                                           |
|--------|---------------------------|-----------------------------------------------------------------------------------------------------------|
| 296.4  | Bipol I currnt manic NOS  | Bipolar I disorder, most recent episode (or current) manic, unspecified                                   |
| 296.41 | Bipol I curnt manic-mild  | Bipolar I disorder, most recent episode (or current) manic, mild                                          |
| 296.42 | Bipol I currnt manic-mod  | Bipolar I disorder, most recent episode (or current) manic, moderate                                      |
| 296.43 | Bipol I manic-sev w/o psy | Bipolar I disorder, most recent episode (or current) manic, severe, without mention of psychotic behavior |
| 296.44 | Bipol I manic-sev w psy   | Bipolar I disorder, most recent episode (or current) manic, severe, specified as with psychotic behavior  |
| 296.45 | Bipol I cur man part rem  | Bipolar I disorder, most recent episode (or current) manic, in partial or unspecified remission           |
| 296.46 | Bipol I cur man full rem  | Bipolar I disorder, most recent episode (or current) manic, in full remission                             |

#### Substance dependence or abuse of alcohol, tobacco, and other illicit drugs

| ICD-9 Code | Short Description        | Long Description                                          |
|------------|--------------------------|-----------------------------------------------------------|
| 303.9      | Alcoh dep NEC/NOS-unspec | Other and unspecified alcohol dependence, unspecified     |
| 303.91     | Alcoh dep NEC/NOS-contin | Other and unspecified alcohol dependence, continuous      |
| 303.92     | Alcoh dep NEC/NOS-episod | Other and unspecified alcohol dependence, episodic        |
| 303.93     | Alcoh dep NEC/NOS-remiss | Other and unspecified alcohol dependence, in remission    |
| 304        | Opioid dependence-unspec | Opioid type dependence, unspecified                       |
| 304.01     | Opioid dependence-contin | Opioid type dependence, continuous                        |
| 304.02     | Opioid dependence-episod | Opioid type dependence, episodic                          |
| 304.03     | Opioid dependence-remiss | Opioid type dependence, in remission                      |
| 304.1      | Sed,hyp,anxiolyt dep-NOS | Sedative, hypnotic or anxiolytic dependence, unspecified  |
| 304.11     | Sed,hyp,anxiolyt dep-con | Sedative, hypnotic or anxiolytic dependence, continuous   |
| 304.12     | Sed,hyp,anxiolyt dep-epi | Sedative, hypnotic or anxiolytic dependence, episodic     |
| 304.13     | Sed,hyp,anxiolyt dep-rem | Sedative, hypnotic or anxiolytic dependence, in remission |
| 304.2      | Cocaine depend-unspec    | Cocaine dependence, unspecified                           |
| 304.21     | Cocaine depend-contin    | Cocaine dependence, continuous                            |
| 304.22     | Cocaine depend-episodic  | Cocaine dependence, episodic                              |
| 304.23     | Cocaine depend-remiss    | Cocaine dependence, in remission                          |
| 304.3      | Cannabis depend-unspec   | Cannabis dependence, unspecified                          |
| 304.31     | Cannabis depend-contin   | Cannabis dependence, continuous                           |
| 304.32     | Cannabis depend-episodic | Cannabis dependence, episodic                             |

|        |                          |                                                                               |
|--------|--------------------------|-------------------------------------------------------------------------------|
| 304.33 | Cannabis depend-remiss   | Cannabis dependence, in remission                                             |
| 304.4  | Amphetamin depend-unspec | Amphetamine and other psychostimulant dependence, unspecified                 |
| 304.41 | Amphetamin depend-contin | Amphetamine and other psychostimulant dependence, continuous                  |
| 304.42 | Amphetamin depend-episod | Amphetamine and other psychostimulant dependence, episodic                    |
| 304.43 | Amphetamin depend-remiss | Amphetamine and other psychostimulant dependence, in remission                |
| 304.5  | Hallucinogen dep-unspec  | Hallucinogen dependence, unspecified                                          |
| 304.51 | Hallucinogen dep-contin  | Hallucinogen dependence, continuous                                           |
| 304.52 | Hallucinogen dep-episod  | Hallucinogen dependence, episodic                                             |
| 304.53 | Hallucinogen dep-remiss  | Hallucinogen dependence, in remission                                         |
| 304.6  | Drug depend NEC-unspec   | Other specified drug dependence, unspecified                                  |
| 304.61 | Drug depend NEC-contin   | Other specified drug dependence, continuous                                   |
| 304.62 | Drug depend NEC-episodic | Other specified drug dependence, episodic                                     |
| 304.63 | Drug depend NEC-in rem   | Other specified drug dependence, in remission                                 |
| 304.7  | Opioid/other dep-unspec  | Combinations of opioid type drug with any other drug dependence, unspecified  |
| 304.71 | Opioid/other dep-contin  | Combinations of opioid type drug with any other drug dependence, continuous   |
| 304.72 | Opioid/other dep-episod  | Combinations of opioid type drug with any other drug dependence, episodic     |
| 304.73 | Opioid/other dep-remiss  | Combinations of opioid type drug with any other drug dependence, in remission |
| 304.8  | Comb drug dep NEC-unspec | Combinations of drug dependence excluding opioid type drug, unspecified       |
| 304.81 | Comb drug dep NEC-contin | Combinations of drug dependence excluding opioid type drug, continuous        |
| 304.82 | Comb drug dep NEC-episod | Combinations of drug dependence excluding opioid type drug, episodic          |
| 304.83 | Comb drug dep NEC-remiss | Combinations of drug dependence excluding opioid type drug, in remission      |
| 304.9  | Drug depend NOS-unspec   | Unspecified drug dependence, unspecified                                      |
| 304.91 | Drug depend NOS-contin   | Unspecified drug dependence, continuous                                       |
| 304.92 | Drug depend NOS-episodic | Unspecified drug dependence, episodic                                         |
| 304.93 | Drug depend NOS-remiss   | Unspecified drug dependence, in remission                                     |
| 305    | Alcohol abuse-unspec     | Alcohol abuse, unspecified                                                    |
| 305.01 | Alcohol abuse-continuous | Alcohol abuse, continuous                                                     |
| 305.02 | Alcohol abuse-episodic   | Alcohol abuse, episodic                                                       |
| 305.03 | Alcohol abuse-in remiss  | Alcohol abuse, in remission                                                   |
| 305.3  | Hallucinog abuse-unspec  | Hallucinogen abuse, unspecified                                               |
| 305.31 | Hallucinog abuse-contin  | Hallucinogen abuse, continuous                                                |
| 305.32 | Hallucinog abuse-episod  | Hallucinogen abuse, episodic                                                  |
| 305.33 | Hallucinog abuse-remiss  | Hallucinogen abuse, in remission                                              |



|        |                          |                                                                   |
|--------|--------------------------|-------------------------------------------------------------------|
| 305.4  | Sed,hyp,anxiolytc ab-NOS | Sedative, hypnotic or anxiolytic abuse, unspecified               |
| 305.41 | Sed,hyp,anxiolytc ab-con | Sedative, hypnotic or anxiolytic abuse, continuous                |
| 305.42 | Sed,hyp,anxiolytc ab-epi | Sedative, hypnotic or anxiolytic abuse, episodic                  |
| 305.43 | Sed,hyp,anxiolytc ab-rem | Sedative, hypnotic or anxiolytic abuse, in remission              |
| 305.5  | Opioid abuse-unspec      | Opioid abuse, unspecified                                         |
| 305.51 | Opioid abuse-continuous  | Opioid abuse, continuous                                          |
| 305.52 | Opioid abuse-episodic    | Opioid abuse, episodic                                            |
| 305.53 | Opioid abuse-in remiss   | Opioid abuse, in remission                                        |
| 305.6  | Cocaine abuse-unspec     | Cocaine abuse, unspecified                                        |
| 305.61 | Cocaine abuse-continuous | Cocaine abuse, continuous                                         |
| 305.62 | Cocaine abuse-episodic   | Cocaine abuse, episodic                                           |
| 305.63 | Cocaine abuse-in remiss  | Cocaine abuse, in remission                                       |
| 305.7  | Amphetamine abuse-unspec | Amphetamine or related acting sympathomimetic abuse, unspecified  |
| 305.71 | Amphetamine abuse-contin | Amphetamine or related acting sympathomimetic abuse, continuous   |
| 305.72 | Amphetamine abuse-episod | Amphetamine or related acting sympathomimetic abuse, episodic     |
| 305.73 | Amphetamine abuse-remiss | Amphetamine or related acting sympathomimetic abuse, in remission |
| 305.8  | Antidepress abuse-unspec | Antidepressant type abuse, unspecified                            |
| 305.81 | Antidepress abuse-contin | Antidepressant type abuse, continuous                             |
| 305.82 | Antidepress abuse-episod | Antidepressant type abuse, episodic                               |
| 305.83 | Antidepress abuse-remiss | Antidepressant type abuse, in remission                           |

**Cannabis abuse**

| ICD-9 Code | Short Description        | Long Description             |
|------------|--------------------------|------------------------------|
| 305.2      | Cannabis abuse-unspec    | Cannabis abuse, unspecified  |
| 305.21     | Cannabis abuse-contin    | Cannabis abuse, continuous   |
| 305.22     | Cannabis abuse-episodic  | Cannabis abuse, episodic     |
| 305.23     | Cannabis abuse-in remiss | Cannabis abuse, in remission |

**Tobacco use**

| ICD-9 Code | Short Description    | Long Description     |
|------------|----------------------|----------------------|
| 305.1      | Tobacco use disorder | Tobacco use disorder |

**Alcohol abuse**

| ICD-9 Code | Short Description        | Long Description                                      |
|------------|--------------------------|-------------------------------------------------------|
| 303.9      | Alcoh dep NEC/NOS-unspec | Other and unspecified alcohol dependence, unspecified |
| 303.91     | Alcoh dep NEC/NOS-contin | Other and unspecified alcohol dependence, continuous  |
| 303.92     | Alcoh dep NEC/NOS-episod | Other and unspecified alcohol dependence, episodic    |

1  
2  
3  
4  
5  
6  
7  
8  
9  
10  
11  
12  
13  
14  
15  
16  
17  
18  
19  
20  
21  
22  
23  
24  
25  
26  
27  
28  
29  
30  
31  
32  
33  
34  
35  
36  
37  
38  
39  
40  
41  
42  
43  
44  
45  
46  
47  
48  
49  
50  
51  
52  
53  
54  
55  
56  
57  
58  
59  
60

|        |                          |                                                        |
|--------|--------------------------|--------------------------------------------------------|
| 303.93 | Alcoh dep NEC/NOS-remiss | Other and unspecified alcohol dependence, in remission |
|--------|--------------------------|--------------------------------------------------------|

For peer review only

**eFigure 1.** Health outcomes with substantial or moderate evidence of a statistical association with cannabis use based on the National Academy of Science (NAS) summary statement. Medical diagnoses are identified based on a significant ( $P < 0.05$ ) comparison between New York (NY) and Oklahoma (OK) (control states without cannabis legalization) with regards to the change of admission rates for such diagnoses following cannabis legalization. P values for the comparison between Colorado (CO) (site of cannabis legalization) and NY (rhomboid symbol), or between CO and OK (circular symbol) are shown as either  $< 0.05$ , or  $> 0.05$  using a gray scale for evidence of cannabis benefit (risk ratio [RR]  $< 1$  shown on the left) and cannabis harm (RR  $> 1$  shown on the right); 95% confidence intervals are shown for the comparison between CO and NY and between CO and OK as solid and dotted lines, respectively. Progressively darker shades of green or red indicate greater weight of evidence in the direction of proposed benefit versus harm, respectively, by the NAS.

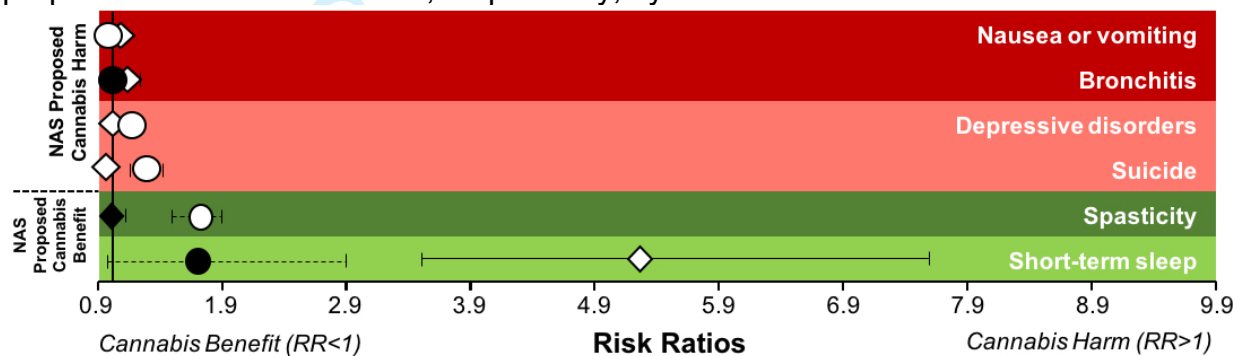

Only

**eFigure 2.** Multivariate adjusted rates of total hospital admissions over 2010-2014 in Colorado, site of implementation of the 2012 recreational cannabis legalization policy, compared with New York (A) and Oklahoma (B), control states without cannabis legalization. Red lines show the predicted rates of admissions for schizophrenia or other psychoses (and all remaining medical diagnoses plotted in eFigures 2-15) had the cannabis legalization policy not been instituted. RR = risk ratio; CI = confidence interval.

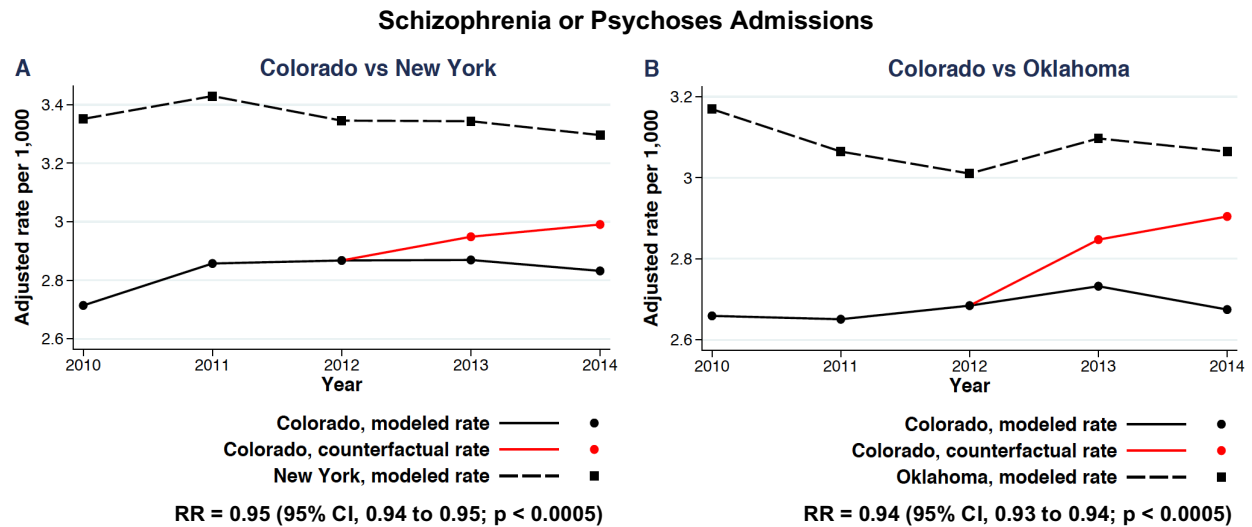

**eFigure 3.** Multivariate adjusted rates of admissions for motor vehicle accidents over 2010-2014 in Colorado compared with New York (A) and Oklahoma (B). RR = risk ratio; CI = confidence interval.

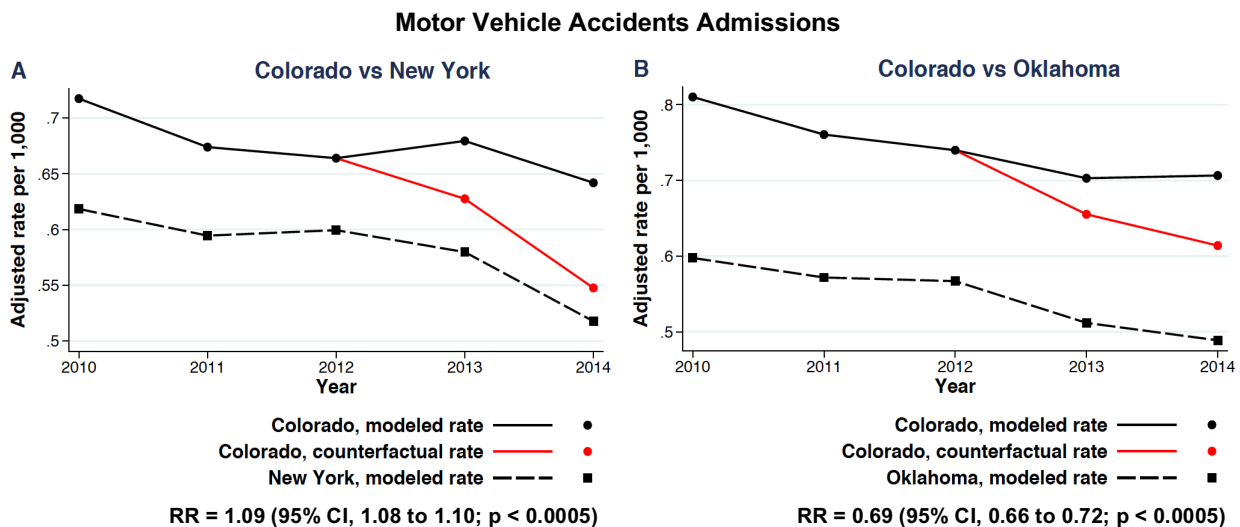

**eFigure 4.** Multivariate adjusted rates of admissions for nausea or vomiting over 2010-2014 in Colorado compared with New York (A) and Oklahoma (B). RR = risk ratio; CI = confidence interval.

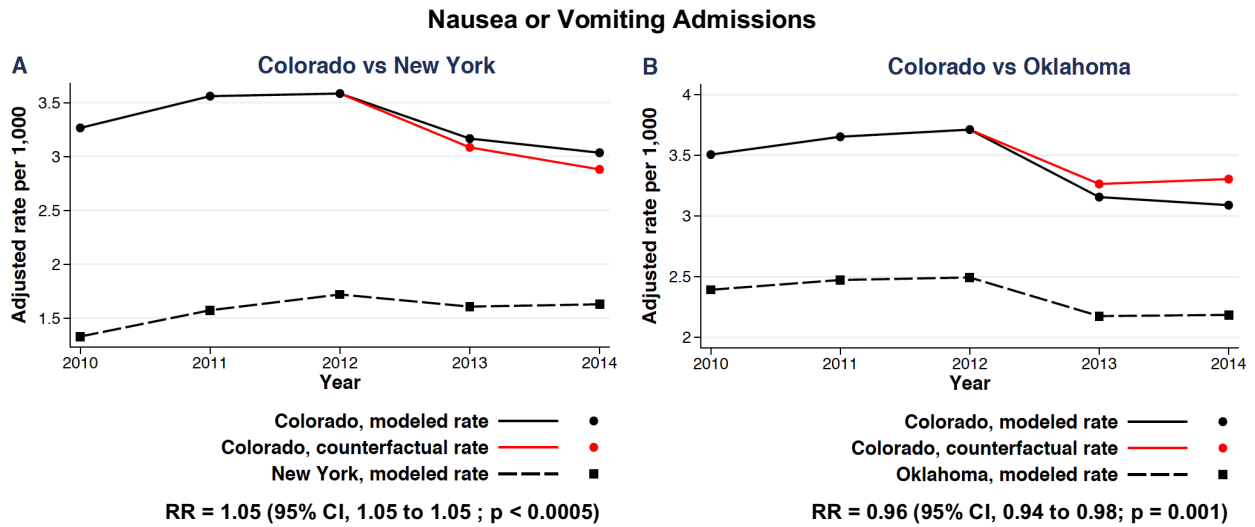

**eFigure 5.** Multivariate adjusted rates of admissions for bronchitis over 2010-2014 in Colorado compared with New York (A) and Oklahoma (B). RR = risk ratio; CI = confidence interval.

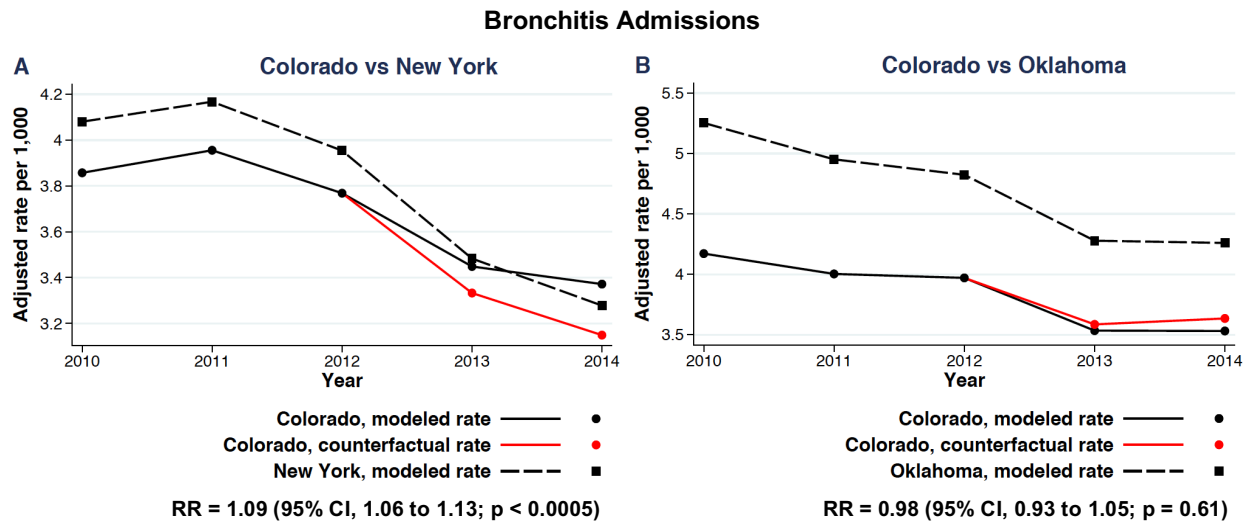

**eFigure 6.** Multivariate adjusted rates of admissions for abuse of other substances over 2010-2014 in Colorado compared with New York (A) and Oklahoma (B). RR = risk ratio; CI = confidence interval.



**eFigure 7.** Multivariate adjusted rates of admissions for alcohol abuse over 2010-2014 in Colorado compared with New York (A) and Oklahoma (B). RR = risk ratio; CI = confidence interval.

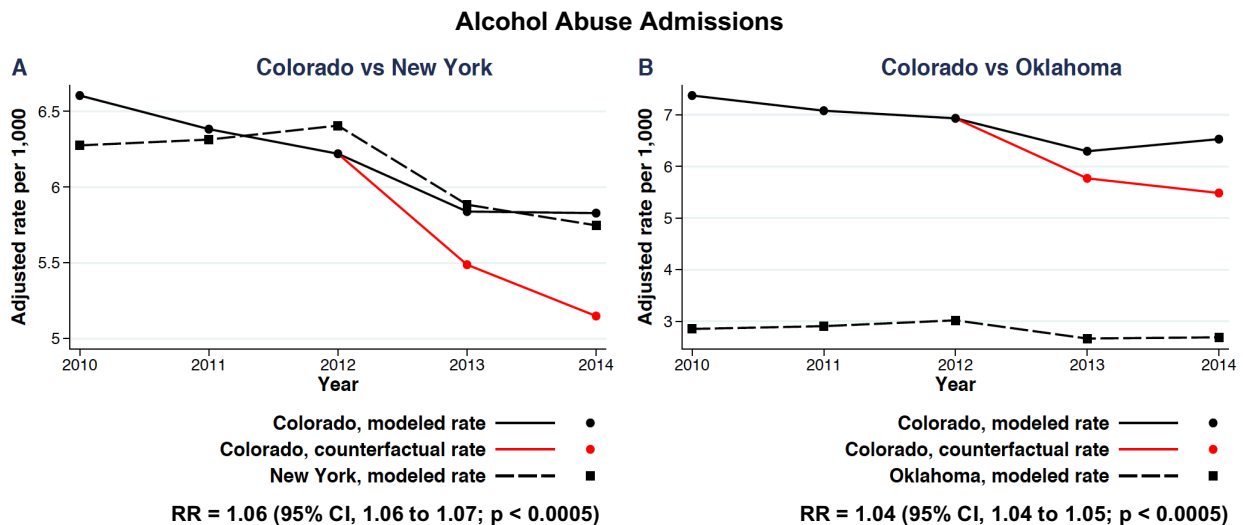

**eFigure 8.** Multivariate adjusted rates of admissions for social anxiety disorder over 2010-2014 in Colorado compared with New York (A) and Oklahoma (B). RR = risk ratio; CI = confidence interval.

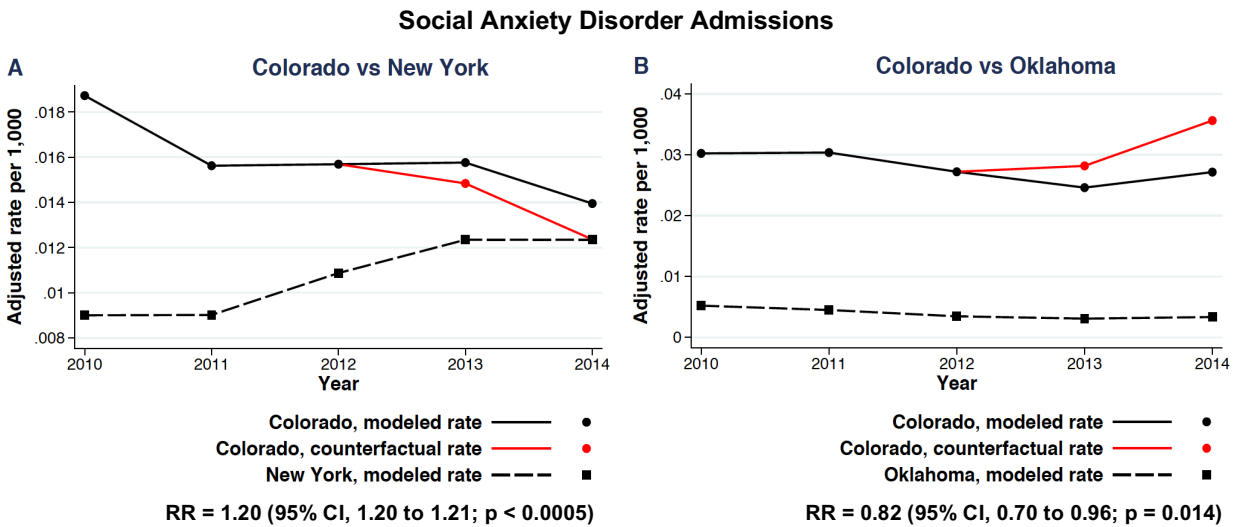

**eFigure 9.** Multivariate adjusted rates of admissions for overdose injury over 2010-2014 in Colorado compared with New York (A) and Oklahoma (B). RR = risk ratio; CI = confidence interval.

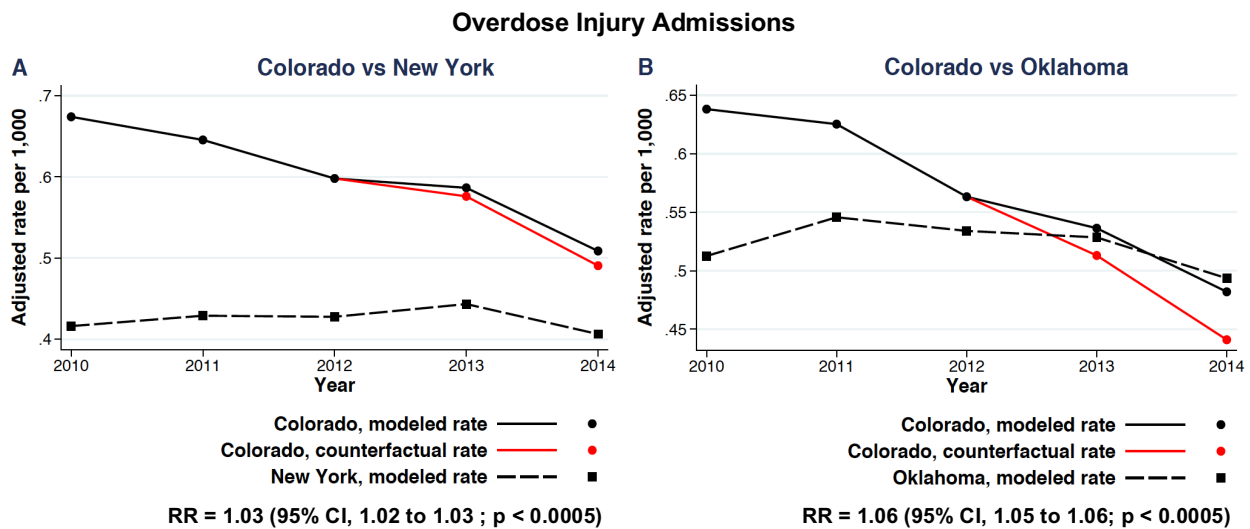

**eFigure 10.** Multivariate adjusted rates of admissions for bipolar disorders over 2010-2014 in Colorado compared with New York (A) and Oklahoma (B). RR = risk ratio; CI = confidence interval.

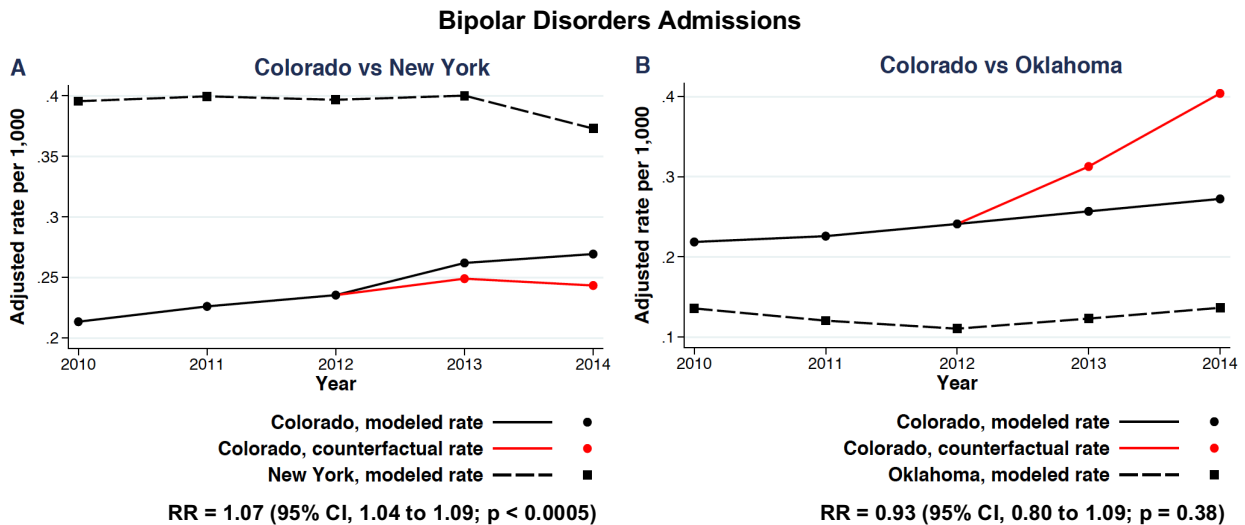

**eFigure 11.** Multivariate adjusted rates of admissions for depressive disorders over 2010-2014 in Colorado compared with New York (A) and Oklahoma (B). RR = risk ratio; CI = confidence interval.

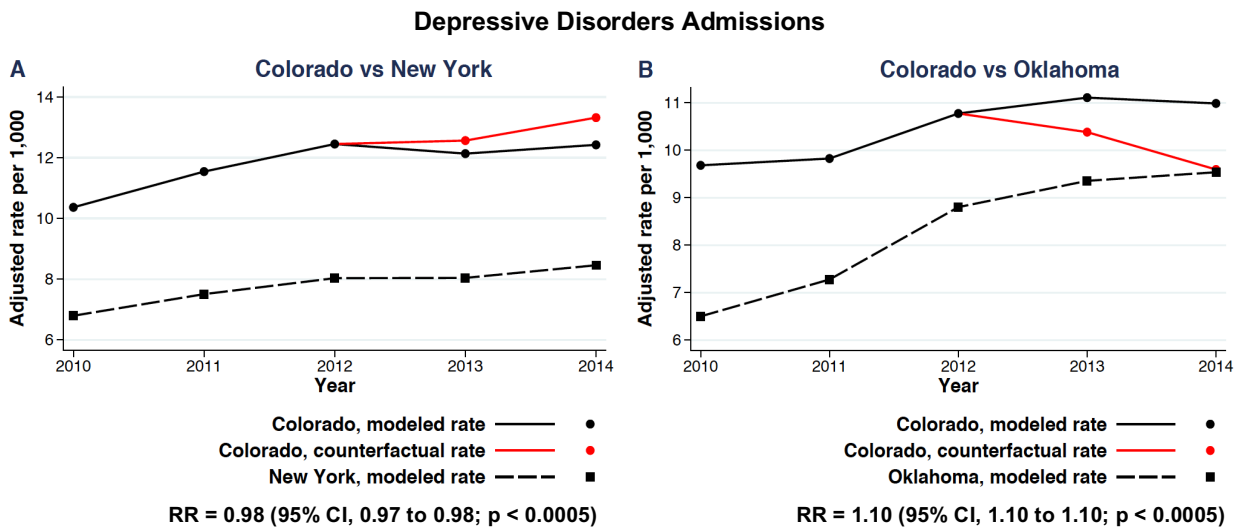



**eFigure 12.** Multivariate adjusted rates of admissions for suicide over 2010-2014 in Colorado compared with New York (A) and Oklahoma (B). RR = risk ratio; CI = confidence interval.

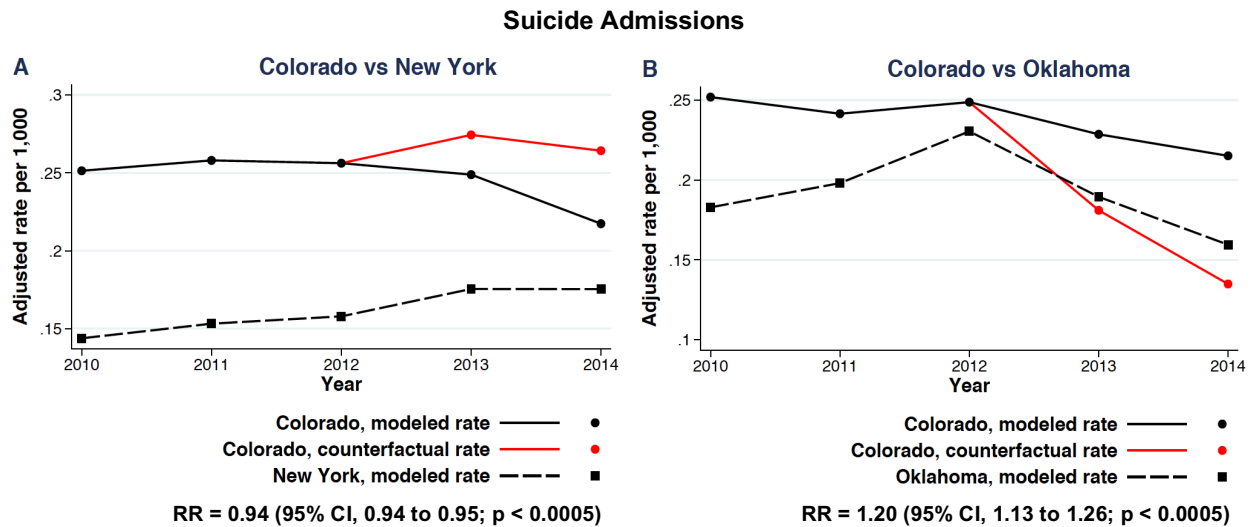

**eFigure 13.** Multivariate adjusted rates of admissions for chronic pain over 2010-2014 in Colorado compared with New York (A) and Oklahoma (B). RR = risk ratio; CI = confidence interval.

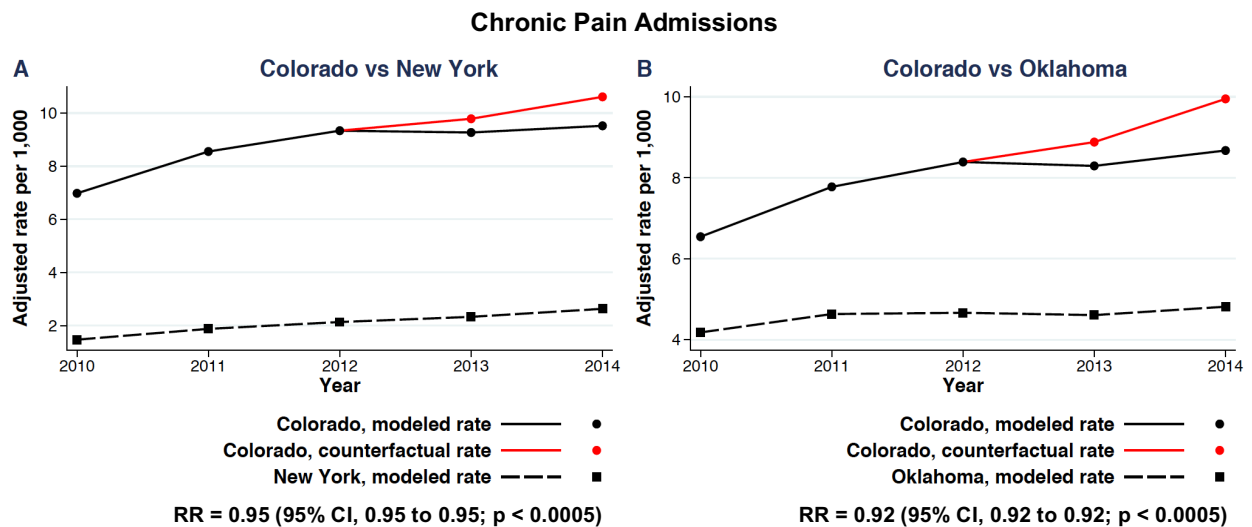

**eFigure 14.** Multivariate adjusted rates of admissions for spasticity over 2010-2014 in Colorado compared with New York (A) and Oklahoma (B). RR = risk ratio; CI = confidence interval.



**eFigure 15.** Multivariate adjusted rates of admissions for short-term sleep disorders over 2010-2014 in Colorado compared with New York (A) and Oklahoma (B). RR = risk ratio; CI = confidence interval.

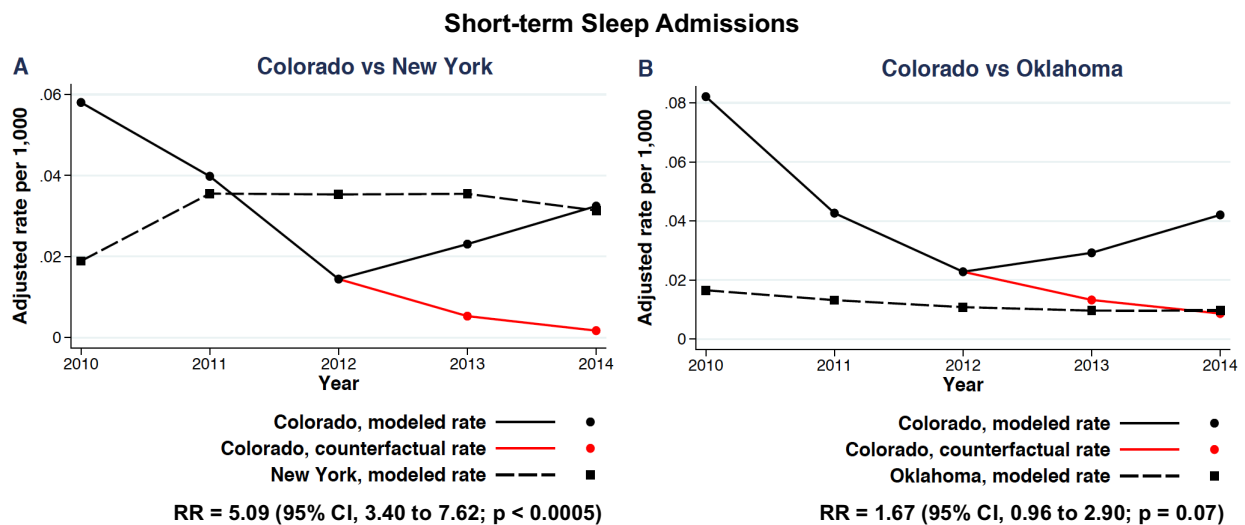

**eTable 3.** Changes in specific NAS outcomes in a sensitivity analysis using January 2014 as the date of recreational cannabis legalization

| <b>NAS Outcome</b>         | <b>State Comparisons</b> | <b>RR</b> | <b>95% CI</b> | <b>P value</b> |
|----------------------------|--------------------------|-----------|---------------|----------------|
| Motor vehicle accidents    | CO vs NY                 | 1.22      | (1.16, 1.28)  | <0.0005        |
|                            | CO vs OK                 | 1.18      | (1.02, 1.37)  | 0.026          |
|                            | NY vs OK                 | 1.04      | (0.77, 1.40)  | 0.81           |
| Overdose injury            | CO vs NY                 | 1.11      | (1.09, 1.14)  | <0.0005        |
|                            | CO vs OK                 | 1.03      | (0.98, 1.09)  | 0.25           |
|                            | NY vs OK                 | 0.98      | (0.80, 1.19)  | 0.81           |
| Bipolar disorders          | CO vs NY                 | 1.08      | (1.06, 1.09)  | <0.0005        |
|                            | CO vs OK                 | 0.81      | (0.73, 0.90)  | <0.0005        |
|                            | NY vs OK                 | 0.77      | (0.75, 0.78)  | <0.0005        |
| Depressive disorders       | CO vs NY                 | 1.01      | (0.99, 1.03)  | 0.59           |
|                            | CO vs OK                 | 1.23      | (1.20, 1.25)  | <0.0005        |
|                            | NY vs OK                 | 1.16      | (1.07, 1.26)  | <0.0005        |
| Schizophrenia or psychoses | CO vs NY                 | 0.84      | (0.82, 0.86)  | <0.0005        |
|                            | CO vs OK                 | 0.80      | (0.79, 0.80)  | <0.0005        |
|                            | NY vs OK                 | 0.88      | (0.87, 0.90)  | <0.0005        |
| Social anxiety disorder    | CO vs NY                 | 1.45      | (1.43, 1.48)  | <0.0005        |
|                            | CO vs OK                 | 0.58      | (0.47, 0.71)  | <0.0005        |
|                            | NY vs OK                 | 0.46      | (0.29, 0.74)  | 0.001          |
| Suicide                    | CO vs NY                 | 1.09      | (1.03, 1.15)  | 0.002          |
|                            | CO vs OK                 | 1.26      | (1.12, 1.41)  | <0.0005        |
|                            | NY vs OK                 | 1.11      | (1.04, 1.18)  | 0.001          |
| Bronchitis                 | CO vs NY                 | 1.19      | (1.15, 1.23)  | <0.0005        |
|                            | CO vs OK                 | 1.03      | (0.97, 1.10)  | 0.33           |
|                            | NY vs OK                 | 0.82      | (0.78, 0.87)  | <0.0005        |
| Abuse of other substances  | CO vs NY                 | 1.04      | (1.03, 1.05)  | <0.0005        |
|                            | CO vs OK                 | 0.99      | (0.97, 1.01)  | 0.45           |
|                            | NY vs OK                 | 0.94      | (0.90, 0.98)  | 0.007          |
| Nausea or vomiting         | CO vs NY                 | 1.08      | (1.06, 1.10)  | <0.0005        |
|                            | CO vs OK                 | 0.95      | (0.97, 1.01)  | <0.0005        |
|                            | NY vs OK                 | 0.89      | (0.90, 0.98)  | 0.01           |
| Chronic pain               | CO vs NY                 | 0.94      | (0.93, 0.96)  | <0.0005        |
|                            | CO vs OK                 | 0.92      | (0.91, 0.93)  | <0.0005        |
|                            | NY vs OK                 | 0.93      | (0.90, 0.96)  | <0.0005        |
| Spasticity                 | CO vs NY                 | 0.75      | (0.71, 0.79)  | <0.0005        |
|                            | CO vs OK                 | 1.56      | (1.14, 2.14)  | 0.006          |
|                            | NY vs OK                 | 2.12      | (1.64, 2.76)  | <0.0005        |
| Short-term sleep           | CO vs NY                 | 11.7      | (7.36, 18.59) | <0.0005        |
|                            | CO vs OK                 | 3.44      | (1.32, 8.99)  | 0.012          |
|                            | NY vs OK                 | 0.45      | (0.06, 3.22)  | 0.42           |

STROBE Statement—Checklist of items that should be included in reports of *cohort studies*

|                              | Item No | Recommendation                                                                                                                                                                                                                                                                                                         | Page No                        |
|------------------------------|---------|------------------------------------------------------------------------------------------------------------------------------------------------------------------------------------------------------------------------------------------------------------------------------------------------------------------------|--------------------------------|
| <b>Title and abstract</b>    | 1       | (a) Indicate the study's design with a commonly used term in the title or the abstract                                                                                                                                                                                                                                 | 1                              |
|                              |         | (b) Provide in the abstract an informative and balanced summary of what was done and what was found                                                                                                                                                                                                                    | 2                              |
| <b>Introduction</b>          |         |                                                                                                                                                                                                                                                                                                                        |                                |
| Background/rationale         | 2       | Explain the scientific background and rationale for the investigation being reported                                                                                                                                                                                                                                   | 5                              |
| Objectives                   | 3       | State specific objectives, including any prespecified hypotheses                                                                                                                                                                                                                                                       | 5                              |
| <b>Methods</b>               |         |                                                                                                                                                                                                                                                                                                                        |                                |
| Study design                 | 4       | Present key elements of study design early in the paper                                                                                                                                                                                                                                                                | 6, 7, 8                        |
| Setting                      | 5       | Describe the setting, locations, and relevant dates, including periods of recruitment, exposure, follow-up, and data collection                                                                                                                                                                                        | 6, 7, 8                        |
| Participants                 | 6       | (a) Give the eligibility criteria, and the sources and methods of selection of participants. Describe methods of follow-up<br>(b) For matched studies, give matching criteria and number of exposed and unexposed                                                                                                      | 6, 7                           |
| Variables                    | 7       | Clearly define all outcomes, exposures, predictors, potential confounders, and effect modifiers. Give diagnostic criteria, if applicable                                                                                                                                                                               | 6, 7, 8                        |
| Data sources/<br>measurement | 8*      | For each variable of interest, give sources of data and details of methods of assessment (measurement). Describe comparability of assessment methods if there is more than one group                                                                                                                                   | 6, 7, 8                        |
| Bias                         | 9       | Describe any efforts to address potential sources of bias                                                                                                                                                                                                                                                              | 7, 8                           |
| Study size                   | 10      | Explain how the study size was arrived at                                                                                                                                                                                                                                                                              | 6, 7                           |
| Quantitative variables       | 11      | Explain how quantitative variables were handled in the analyses. If applicable, describe which groupings were chosen and why                                                                                                                                                                                           | 7, 8                           |
| Statistical methods          | 12      | (a) Describe all statistical methods, including those used to control for confounding<br>(b) Describe any methods used to examine subgroups and interactions<br>(c) Explain how missing data were addressed<br>(d) If applicable, explain how loss to follow-up was addressed<br>(e) Describe any sensitivity analyses | 9, 10<br><br>6, 7<br><br>8, 10 |
| <b>Results</b>               |         |                                                                                                                                                                                                                                                                                                                        |                                |
| Participants                 | 13*     | (a) Report numbers of individuals at each stage of study—eg numbers potentially eligible, examined for eligibility, confirmed eligible, included in the study, completing follow-up, and analysed<br>(b) Give reasons for non-participation at each stage<br>(c) Consider use of a flow diagram                        | 11                             |
| Descriptive data             | 14*     | (a) Give characteristics of study participants (eg demographic, clinical, social) and information on exposures and potential confounders<br>(b) Indicate number of participants with missing data for each variable of interest<br>(c) Summarise follow-up time (eg, average and total amount)                         | 11, 12, 13                     |
| Outcome data                 | 15*     | Report numbers of outcome events or summary measures over time                                                                                                                                                                                                                                                         | 13, 14                         |

|    |                          |    |                                                                                                                                                                                                              |        |
|----|--------------------------|----|--------------------------------------------------------------------------------------------------------------------------------------------------------------------------------------------------------------|--------|
| 1  | Main results             | 16 | (a) Give unadjusted estimates and, if applicable, confounder-adjusted estimates and their precision (eg, 95% confidence interval). Make clear which confounders were adjusted for and why they were included | 11-14  |
| 2  |                          |    | (b) Report category boundaries when continuous variables were categorized                                                                                                                                    |        |
| 3  |                          |    | (c) If relevant, consider translating estimates of relative risk into absolute risk for a meaningful time period                                                                                             |        |
| 4  |                          |    |                                                                                                                                                                                                              |        |
| 5  |                          |    |                                                                                                                                                                                                              |        |
| 6  |                          |    |                                                                                                                                                                                                              |        |
| 7  |                          |    |                                                                                                                                                                                                              |        |
| 8  |                          |    |                                                                                                                                                                                                              |        |
| 9  | Other analyses           | 17 | Report other analyses done—eg analyses of subgroups and interactions, and sensitivity analyses                                                                                                               | 12, 14 |
| 10 |                          |    |                                                                                                                                                                                                              |        |
| 11 | <b>Discussion</b>        |    |                                                                                                                                                                                                              |        |
| 12 |                          |    |                                                                                                                                                                                                              |        |
| 13 | Key results              | 18 | Summarise key results with reference to study objectives                                                                                                                                                     | 14-16  |
| 14 |                          |    |                                                                                                                                                                                                              |        |
| 15 | Limitations              | 19 | Discuss limitations of the study, taking into account sources of potential bias or imprecision. Discuss both direction and magnitude of any potential bias                                                   | 17-19  |
| 16 |                          |    |                                                                                                                                                                                                              |        |
| 17 | Interpretation           | 20 | Give a cautious overall interpretation of results considering objectives, limitations, multiplicity of analyses, results from similar studies, and other relevant evidence                                   | 14-19  |
| 18 |                          |    |                                                                                                                                                                                                              |        |
| 19 |                          |    |                                                                                                                                                                                                              |        |
| 20 | Generalisability         | 21 | Discuss the generalisability (external validity) of the study results                                                                                                                                        | 20     |
| 21 |                          |    |                                                                                                                                                                                                              |        |
| 22 | <b>Other information</b> |    |                                                                                                                                                                                                              |        |
| 23 | Funding                  | 22 | Give the source of funding and the role of the funders for the present study and, if applicable, for the original study on which the present article is based                                                | 21     |
| 24 |                          |    |                                                                                                                                                                                                              |        |

\*Give information separately for exposed and unexposed groups.

**Note:** An Explanation and Elaboration article discusses each checklist item and gives methodological background and published examples of transparent reporting. The STROBE checklist is best used in conjunction with this article (freely available on the Web sites of PLoS Medicine at <http://www.plosmedicine.org/>, Annals of Internal Medicine at <http://www.annals.org/>, and Epidemiology at <http://www.epidem.com/>). Information on the STROBE Initiative is available at <http://www.strobe-statement.org>.
