# Supplementary material for: Does cannabis legalisation change healthcare utilisation? A population-based study using the healthcare cost and utilisation project in Colorado, USA
Source: PubMed Central journal article supplement — BMJ Open. 2019 May 15;9(5):e027432. doi: 10.1136/bmjopen-2018-027432 (PMC6530411; doi:10.1136/bmjopen-2018-027432), 2019-05-15
Supplement: bmjopen-2018-027432supp001.pdf [file bmjopen-2018-027432supp001.pdf]

## Supplementary Appendix

### Changes in Inpatient Healthcare Utilization after Legalization of Recreational Cannabis

Francesca N. Delling, MD, MPH;<sup>1</sup> Eric Vittinghoff, PhD;<sup>1</sup> Thomas A. Dewland, MD;<sup>2</sup> Mark J. Pletcher, MD, MPH;<sup>1</sup> Jeffrey E. Olgin, MD;<sup>1</sup> Gregory Nah, MA;<sup>1</sup> Kirstin Aschbacher, PhD;<sup>1</sup> Christina Fang, BA;<sup>1</sup> Emily S. Lee, BA;<sup>1</sup> Shannon M. Fan, BA;<sup>1</sup> Dhruv S. Kazi, MD, MS;<sup>1</sup> and Gregory M. Marcus, MD, MAS.<sup>1</sup>

<sup>1</sup>Department of Medicine, Division of Cardiology, University of California, San Francisco, San Francisco, CA, USA

<sup>2</sup>Knight Cardiovascular Institute, Oregon Health & Science University, Portland, OR, USA

### Table of Contents

**eMethods.** Cost Analysis

**eTable 1.** Yearly costs and charges for the 3 study states

**eTable 2.** International Classification of Diseases-9<sup>th</sup> Edition (ICD-9) codes defining each medical diagnosis

**eFigure 1.** Health outcomes with substantial or moderate evidence of a statistical association with cannabis use based on the National Academy of Science (NAS) summary statement

**eFigure 2-15.** Plots depicting admission rates for diagnoses classified based on weight of evidence from the National Academy of Science

**eTable 3.** Changes in specific NAS outcomes in a sensitivity analysis using January 2014 as the date of recreational cannabis legalization

This supplementary material has been provided by the authors to give readers additional information about their work.

## **eMethods. Cost Analysis**

### **Cost Estimations**

The inpatient cost for each hospitalization in New York and Colorado was estimated by multiplying the total charges (TOTCHG) obtained from HCUP State Inpatient Database with the institution-specific all-payer cost-to-charge ratio (APICC) obtained from the Cost-to-Charge Ratio file. Hospital ID was used as a linkage to merge both files. Total inpatient costs were calculated as the sum of the cost for all hospitalizations in a given state for a particular year. The databases contained 186,226 (8.7%) encounters with non-matched/missing hospital ID for NY and 1,132,696 (9.6%) encounters with non-matched/missing hospital ID for Colorado; for these encounters. In order to estimate the cost of these hospitalizations (for which we had charges but no cost-to-charge ratio) we applied the average cost-to-charge ratio for that state-year. This was estimated by dividing the sum of costs for all hospitalizations for which cost-to-charge ratios were available by the sum of charges for all hospitalizations for which cost-to-charge ratios were available in a given state-year (**eTable 2**).

### **Oklahoma Total Cost Estimate**

HCUP does not produce SID and CCR file for Oklahoma. We obtained these data from Oklahoma State Department of Health – this dataset contains information about total charges but not cost-to-charge ratios. We estimated total inpatient costs in Oklahoma in two ways. First, we used a state-wide constant cost-to-charge ratio (0.3119) to estimate the total cost (ratio derived from the Institute for Health and Socio-Economic Policy calculations of federal cost reports). We then conducted a sensitivity analysis in which we used the average of the cost-to-charge ratios of New York and Colorado for any given state-year (**eTable 2**).

**eTable 1.** Yearly costs and charges for the 3 study states

| <b>Colorado</b>                                                   | <b>2010</b>      | <b>2011</b>      | <b>2012</b>      | <b>2013</b>      | <b>2014</b>      | <b>2010 to 2014</b> |
|-------------------------------------------------------------------|------------------|------------------|------------------|------------------|------------------|---------------------|
| Total hospitalizations, n                                         | 397,505          | 428,912          | 424,640          | 418,952          | 418,900          | 2,088,909           |
| Hospitalizations for which CCR is available, n (%)                | 396,433 (99.7%)  | 301,586 (70.3%)  | 382,021 (90.0%)  | 412,483 (98.5%)  | 413,160 (98.6%)  | 1,905,683 (91.2%)   |
| Total charges for hospitalizations for which CCR is available     | \$14,382,791,648 | \$11,170,040,412 | \$15,821,232,608 | \$19,349,895,615 | \$20,370,018,114 | \$81,093,978,397    |
| Total costs for hospitalizations for which CCR is available       | \$4,104,443,164  | \$3,033,915,324  | \$3,963,892,093  | \$4,619,884,886  | \$4,700,380,255  | \$20,422,515,722    |
| Average CCR*                                                      | 0.2854           | 0.2716           | 0.2505           | 0.2388           | 0.2309           |                     |
| Hospitalizations for which CCR is not available, n (%)            | 1,072 (0.3%)     | 127,326 (29.7%)  | 42,619 (10.0%)   | 6,469 (1.5%)     | 5,740 (1.4%)     | 183,226 (8.8%)      |
| Total charges for hospitalizations for which CCR is not available | \$55,039,614     | \$5,704,285,087  | \$2,494,379,901  | \$241,011,451    | \$211,228,665    | \$8,705,944,718     |
| Total costs for hospitalizations for which CCR is not available†  | \$15,708,306     | \$1,549,283,830  | \$624,842,165    | \$57,553,535     | \$48,772,699     | \$2,296,160,534     |
| Total inpatient costs                                             | \$4,120,151,470  | \$4,583,199,154  | \$4,588,734,258  | \$4,677,438,421  | \$4,749,152,954  | \$22,718,676,256    |

\*Average CCR was estimated by dividing the total of costs for all hospitalizations for which cost-to-charge ratios were available by the total charges for hospitalizations for which cost-to-charge ratios were available in a given state-year.

†Total charges for hospitalization for which CCR is not available multiplied by Average CCR in a given state-year.

| <b>New York</b>                                                   | <b>2010</b>       | <b>2011</b>       | <b>2012</b>       | <b>2013</b>       | <b>2014</b>       | <b>2010 to 2014</b> |
|-------------------------------------------------------------------|-------------------|-------------------|-------------------|-------------------|-------------------|---------------------|
| Total hospitalizations, n                                         | 2,417,298         | 2,414,985         | 2,389,701         | 2,290,502         | 2,213,797         | 11,726,283          |
| Hospitalizations for which CCR is available, n (%)                | 2,189,513 (90.6%) | 2,157,629 (89.3%) | 2,168,880 (90.8%) | 2,056,367 (89.8%) | 2,021,199 (91.3%) | 10,593,588 (90.3%)  |
| Total charges for hospitalizations for which CCR is available     | \$66,303,900,691  | \$69,885,515,755  | \$74,728,795,811  | \$77,680,292,105  | \$79,252,368,106  | \$367,850,872,468   |
| Total costs for hospitalizations for which CCR is available       | \$22,376,381,374  | \$23,448,311,348  | \$24,539,963,919  | \$24,331,920,273  | \$23,892,478,440  | \$118,589,055,354   |
| Average CCR*                                                      | 0.3375            | 0.3355            | 0.3283            | 0.3132            | 0.3014            |                     |
| Hospitalizations for which CCR is not available, n (%)            | 227,785 (9.4%)    | 257,356 (10.7%)   | 220,821 (9.2%)    | 234,135 (10.2%)   | 192,598 (8.7%)    | 1,132,695 (9.7%)    |
| Total charges for hospitalizations for which CCR is not available | \$4,168,104,163   | \$4,821,903,339   | \$4,088,909,686   | \$5,687,320,556   | \$5,336,461,039   | \$24,102,698,783    |
| Total costs for hospitalizations for which CCR is not available†  | \$1,406,735,155   | \$1,617,748,571   | \$1,342,797,941   | \$1,781,268,798   | \$1,608,409,357   | \$7,756,959,821     |
| Total inpatient costs                                             | \$23,783,116,529  | \$25,066,059,919  | \$25,882,761,860  | \$26,113,189,071  | \$25,500,887,797  | \$126,346,015,175   |

\*Average CCR was estimated by dividing the total of costs for all hospitalizations for which cost-to-charge ratios were available by the total charges for hospitalizations for which cost-to-charge ratios were available in a given state-year.

†Total charges for hospitalization for which CCR is not available multiplied by Average CCR in a given state-year.

| <b>Oklahoma</b>                                               | <b>2010</b>      | <b>2011</b>      | <b>2012</b>      | <b>2013</b>      | <b>2014</b>      | <b>2010 to 2014</b> |
|---------------------------------------------------------------|------------------|------------------|------------------|------------------|------------------|---------------------|
| Total hospitalizations, n                                     | 489,724          | 476,605          | 476,728          | 452,724          | 439,207          | 2,334,988           |
| Hospitalizations for which CCR is available, n (%)            | 489724 (100%)    | 476605 (100%)    | 476728 (100%)    | 452724 (100%)    | 439207 (100%)    | 2334988 (100%)      |
| Total charges for hospitalizations for which CCR is available | \$13,927,214,520 | \$14,645,751,657 | \$15,247,598,300 | \$15,596,643,583 | \$15,003,967,132 | \$74,421,175,192    |
| Total costs for hospitalizations for which CCR is available   | \$4,343,898,209  | \$4,568,009,942  | \$4,755,725,910  | \$4,864,593,134  | \$5,001,131,977  | \$23,533,359,171    |
| Average CCR*                                                  | 0.3119           | 0.3119           | 0.3119           | 0.3119           | 0.3119           |                     |

\*Statewide constant CCR (0.3119) used to estimate the total cost across years.

| <b>Oklahoma (sensitivity analysis)</b>                       | <b>2010</b>      | <b>2011</b>      | <b>2012</b>      | <b>2013</b>      | <b>2014</b>      | <b>2010 to 2014</b> |
|--------------------------------------------------------------|------------------|------------------|------------------|------------------|------------------|---------------------|
| Total hospitalization, n                                     | 489,724          | 476,605          | 476,728          | 452,724          | 439,207          | 2,334,988           |
| Hospitalization for which CCR is available, n (%)            | 489724 (100%)    | 476605 (100%)    | 476728 (100%)    | 452724 (100%)    | 439207 (100%)    | 2334988 (100%)      |
| Total charges for hospitalization for which CCR is available | \$13,927,214,520 | \$14,645,751,657 | \$15,247,598,300 | \$15,596,643,583 | \$15,003,967,132 | \$74,421,175,192    |
| Total costs for hospitalization for which CCR is available   | \$4,337,630,962  | \$4,445,717,915  | \$4,413,417,328  | \$4,304,673,629  | \$4,267,557,794  | \$21,768,997,628    |
| Average CCR*                                                 | 0.3114           | 0.3036           | 0.2895           | 0.276            | 0.2662           |                     |

\*Average of the CCRs of New York and Colorado for any given state-year.

**eTable 2.** International Classification of Diseases-9<sup>th</sup> Edition (ICD-9) codes defining each medical diagnosis.

**Chronic pain**

| ICD-9 Code | Short Description        | Long Description                 |
|------------|--------------------------|----------------------------------|
| 338.21     | Chronic pain d/t trauma  | Chronic pain due to trauma       |
| 338.22     | Chron post-thoracot pain | Chronic post-thoracotomy pain    |
| 338.28     | Chronic postop pain NEC  | Other chronic postoperative pain |
| 338.29     | Chronic pain NEC         | Other chronic pain               |
| 338.4      | Chronic pain syndrome    | Chronic pain syndrome            |

**Nausea or vomiting**

| ICD-9 Code | Short Description    | Long Description     |
|------------|----------------------|----------------------|
| 787.03     | Vomiting alone       | Vomiting alone       |
| 787.02     | Nausea alone         | Nausea alone         |
| 787.01     | Nausea with vomiting | Nausea with vomiting |

**Spasticity**

| ICD-9 Code | Short Description | Long Description |
|------------|-------------------|------------------|
| 728.85     | Spasm of muscle   | Spasm of muscle  |

**Short-term sleep disorders**

| ICD-9 Code | Short Description        | Long Description                                         |
|------------|--------------------------|----------------------------------------------------------|
| 307.4      | Nonorganic sleep dis NOS | Nonorganic sleep disorder, unspecified                   |
| 307.41     | Transient insomnia       | Transient disorder of initiating or maintaining sleep    |
| 307.42     | Persistent insomnia      | Persistent disorder of initiating or maintaining sleep   |
| 307.45     | Nonorganic circadian rhy | Circadian rhythm sleep disorder of nonorganic origin     |
| 307.47     | Sleep stage dysfunc NEC  | Other dysfunctions of sleep stages or arousal from sleep |
| 307.49     | Nonorganic sleep dis NEC | Other specific disorders of sleep of nonorganic origin   |

**Increased appetite and weight gain**

| ICD-9 Code | Short Description    | Long Description     |
|------------|----------------------|----------------------|
| 783.1      | Abnormal weight gain | Abnormal weight gain |
| 783.6      | Polyphagia           | Polyphagia           |

**Tourette's syndrome**

| ICD-9 Code | Short Description   | Long Description    |
|------------|---------------------|---------------------|
| 307.23     | Tourette's disorder | Tourette's disorder |

**Posttraumatic stress disorder**

| ICD-9 Code | Short Description        | Long Description              |
|------------|--------------------------|-------------------------------|
| 309.81     | Posttraumatic stress dis | Posttraumatic stress disorder |

**Non-seminoma-type testicular germ cell cancer**

| ICD-9 Code | Short Description    | Long Description                                   |
|------------|----------------------|----------------------------------------------------|
| 186.9      | Malig neo testis NEC | Malignant neoplasm of other and unspecified testis |

**Acute myocardial infarction**

| ICD-9 Code | Short Description        | Long Description                                                                 |
|------------|--------------------------|----------------------------------------------------------------------------------|
| 410        | AMI anterolateral,unspec | Acute myocardial infarction of anterolateral wall, episode of care unspecified   |
| 410.01     | AMI anterolateral, init  | Acute myocardial infarction of anterolateral wall, initial episode of care       |
| 410.02     | AMI anterolateral,subseq | Acute myocardial infarction of anterolateral wall, subsequent episode of care    |
| 410.1      | AMI anterior wall,unspec | Acute myocardial infarction of other anterior wall, episode of care unspecified  |
| 410.11     | AMI anterior wall, init  | Acute myocardial infarction of other anterior wall, initial episode of care      |
| 410.12     | AMI anterior wall,subseq | Acute myocardial infarction of other anterior wall, subsequent episode of care   |
| 410.2      | AMI inferolateral,unspec | Acute myocardial infarction of inferolateral wall, episode of care unspecified   |
| 410.21     | AMI inferolateral, init  | Acute myocardial infarction of inferolateral wall, initial episode of care       |
| 410.22     | AMI inferolateral,subseq | Acute myocardial infarction of inferolateral wall, subsequent episode of care    |
| 410.3      | AMI inferopost, unspec   | Acute myocardial infarction of inferoposterior wall, episode of care unspecified |
| 410.31     | AMI inferopost, initial  | Acute myocardial infarction of inferoposterior wall, initial episode of care     |
| 410.32     | AMI inferopost, subseq   | Acute myocardial infarction of inferoposterior wall, subsequent episode of care  |
| 410.4      | AMI inferior wall,unspec | Acute myocardial infarction of other inferior wall, episode of care unspecified  |
| 410.41     | AMI inferior wall, init  | Acute myocardial infarction of other inferior wall, initial episode of care      |
| 410.42     | AMI inferior wall,subseq | Acute myocardial infarction of other inferior wall, subsequent episode of care   |
| 410.5      | AMI lateral NEC, unspec  | Acute myocardial infarction of other lateral wall, episode of care unspecified   |
| 410.51     | AMI lateral NEC, initial | Acute myocardial infarction of other lateral wall, initial episode of care       |
| 410.52     | AMI lateral NEC, subseq  | Acute myocardial infarction of other lateral wall, subsequent episode of care    |
| 410.6      | True post infarct,unspec | True posterior wall infarction, episode of care unspecified                      |
| 410.61     | True post infarct, init  | True posterior wall infarction, initial episode of care                          |

|        |                          |                                                                                   |
|--------|--------------------------|-----------------------------------------------------------------------------------|
| 410.62 | True post infarct,subseq | True posterior wall infarction, subsequent episode of care                        |
| 410.7  | Subendo infarct, unspec  | Subendocardial infarction, episode of care unspecified                            |
| 410.71 | Subendo infarct, initial | Subendocardial infarction, initial episode of care                                |
| 410.72 | Subendo infarct, subseq  | Subendocardial infarction, subsequent episode of care                             |
| 410.8  | AMI NEC, unspecified     | Acute myocardial infarction of other specified sites, episode of care unspecified |
| 410.81 | AMI NEC, initial         | Acute myocardial infarction of other specified sites, initial episode of care     |
| 410.82 | AMI NEC, subsequent      | Acute myocardial infarction of other specified sites, subsequent episode of care  |
| 410.9  | AMI NOS, unspecified     | Acute myocardial infarction of unspecified site, episode of care unspecified      |
| 410.91 | AMI NOS, initial         | Acute myocardial infarction of unspecified site, initial episode of care          |
| 410.92 | AMI NOS, subsequent      | Acute myocardial infarction of unspecified site, subsequent episode of care       |

#### Ischemic stroke

| ICD-9 Code | Short Description        | Long Description                                                                               |
|------------|--------------------------|------------------------------------------------------------------------------------------------|
| 435.8      | Trans cereb ischemia NEC | Other specified transient cerebral ischemias                                                   |
| 435.9      | Trans cereb ischemia NOS | Unspecified transient cerebral ischemia                                                        |
| 433.01     | Ocl bslr art w infrc     | Occlusion and stenosis of basilar artery with cerebral infarction                              |
| 433.11     | Ocl crtd art w infrc     | Occlusion and stenosis of carotid artery with cerebral infarction                              |
| 433.21     | Ocl vrtb art w infrc     | Occlusion and stenosis of vertebral artery with cerebral infarction                            |
| 433.31     | Ocl mlt bi art w infrc   | Occlusion and stenosis of multiple and bilateral precerebral arteries with cerebral infarction |
| 433.81     | Ocl spcf art w infrc     | Occlusion and stenosis of other specified precerebral artery with cerebral infarction          |
| 433.91     | Ocl art NOS w infrc      | Occlusion and stenosis of unspecified precerebral artery with cerebral infarction              |
| 434.91     | Crbl art ocl NOS w infrc | Cerebral artery occlusion, unspecified with cerebral infarction                                |

#### Brain hemorrhage

| ICD-9 Code | Short Description        | Long Description                    |
|------------|--------------------------|-------------------------------------|
| 430        | Subarachnoid hemorrhage  | Subarachnoid hemorrhage             |
| 431        | Intracerebral hemorrhage | Intracerebral hemorrhage            |
| 432        | Nontraum extradural hem  | Nontraumatic extradural hemorrhage  |
| 432.1      | Subdural hemorrhage      | Subdural hemorrhage                 |
| 432.9      | Intracranial hemorr NOS  | Unspecified intracranial hemorrhage |



### Metabolic syndrome and diabetes

| ICD-9 Code | Short Description        | Long Description                                                                                           |
|------------|--------------------------|------------------------------------------------------------------------------------------------------------|
| 277.7      | Dysmetabolic syndrome x  | Dysmetabolic syndrome X                                                                                    |
| 250        | DMII wo cmp nt st uncntr | Diabetes mellitus without mention of complication, type II or unspecified type, not stated as uncontrolled |
| 250.02     | DMII wo cmp uncntrld     | Diabetes mellitus without mention of complication, type II or unspecified type, uncontrolled               |
| 250.1      | DMII keto nt st uncntrld | Diabetes with ketoacidosis, type II or unspecified type, not stated as uncontrolled                        |
| 250.12     | DMII ketoacd uncontrold  | Diabetes with ketoacidosis, type II or unspecified type, uncontrolled                                      |
| 250.2      | DMII hprsm nt st uncntrl | Diabetes with hyperosmolarity, type II or unspecified type, not stated as uncontrolled                     |
| 250.22     | DMII hprosmlr uncontrold | Diabetes with hyperosmolarity, type II or unspecified type, uncontrolled                                   |
| 250.3      | DMII o cm nt st uncntrld | Diabetes with other coma, type II or unspecified type, not stated as uncontrolled                          |
| 250.32     | DMII oth coma uncontrold | Diabetes with other coma, type II or unspecified type, uncontrolled                                        |
| 250.4      | DMII renl nt st uncntrld | Diabetes with renal manifestations, type II or unspecified type, not stated as uncontrolled                |
| 250.42     | DMII renal uncntrld      | Diabetes with renal manifestations, type II or unspecified type, uncontrolled                              |
| 250.5      | DMII ophth nt st uncntrl | Diabetes with ophthalmic manifestations, type II or unspecified type, not stated as uncontrolled           |
| 250.52     | DMII ophth uncntrld      | Diabetes with ophthalmic manifestations, type II or unspecified type, uncontrolled                         |
| 250.6      | DMII neuro nt st uncntrl | Diabetes with neurological manifestations, type II or unspecified type, not stated as uncontrolled         |
| 250.62     | DMII neuro uncntrld      | Diabetes with neurological manifestations, type II or unspecified type, uncontrolled                       |
| 250.7      | DMII circ nt st uncntrld | Diabetes with peripheral circulatory disorders, type II or unspecified type, not stated as uncontrolled    |
| 250.72     | DMII circ uncntrld       | Diabetes with peripheral circulatory disorders, type II or unspecified type, uncontrolled                  |
| 250.8      | DMII oth nt st uncntrld  | Diabetes with other specified manifestations, type II or unspecified type, not stated as uncontrolled      |
| 250.82     | DMII oth uncntrld        | Diabetes with other specified manifestations, type II or unspecified type, uncontrolled                    |
| 250.9      | DMII unspf nt st uncntrl | Diabetes with unspecified complication, type II or unspecified type, not stated as uncontrolled            |

|        |                     |                                                                                   |
|--------|---------------------|-----------------------------------------------------------------------------------|
| 250.92 | DMII unspf uncntrld | Diabetes with unspecified complication, type II or unspecified type, uncontrolled |
|--------|---------------------|-----------------------------------------------------------------------------------|

#### Prediabetes

| ICD-9 Code | Short Description    | Long Description       |
|------------|----------------------|------------------------|
| 790.29     | Abnormal glucose NEC | Other abnormal glucose |

#### Bronchitis

| ICD-9 Code | Short Description        | Long Description                                         |
|------------|--------------------------|----------------------------------------------------------|
| 466        | Acute bronchitis         | Acute bronchitis                                         |
| 490        | Bronchitis NOS           | Bronchitis, not specified as acute or chronic            |
| 491        | Simple chr bronchitis    | Simple chronic bronchitis                                |
| 491.1      | Mucopurul chr bronchitis | Mucopurulent chronic bronchitis                          |
| 491.2      | Obst chr bronc w/o exac  | Obstructive chronic bronchitis without exacerbation      |
| 491.21     | Obs chr bronc w(ac) exac | Obstructive chronic bronchitis with (acute) exacerbation |
| 491.22     | Obs chr bronc w ac bronc | Obstructive chronic bronchitis with acute bronchitis     |
| 491.8      | Chronic bronchitis NEC   | Other chronic bronchitis                                 |
| 491.9      | Chronic bronchitis NOS   | Unspecified chronic bronchitis                           |

#### Motor vehicle accidents

| ICD-9 Code | Short Description       | Long Description                                                                                                                       |
|------------|-------------------------|----------------------------------------------------------------------------------------------------------------------------------------|
| E812.0     | Mv collision NOS-driver | Other motor vehicle traffic accident involving collision with motor vehicle injuring driver of motor vehicle other than motorcycle     |
| E812.1     | Mv collision NOS-pasngr | Other motor vehicle traffic accident involving collision with motor vehicle injuring passenger in motor vehicle other than motorcycle  |
| E812.2     | Mv collis NOS-motorcycl | Other motor vehicle traffic accident involving collision with motor vehicle injuring motorcyclist                                      |
| E812.3     | Mv coll NOS-mcycl psngr | Other motor vehicle traffic accident involving collision with motor vehicle injuring passenger on motorcycle                           |
| E812.4     | Mv collision NOS-st car | Other motor vehicle traffic accident involving collision with motor vehicle injuring occupant of streetcar                             |
| E812.5     | Mv coll NOS-anim rid    | Other motor vehicle traffic accident involving collision with motor vehicle injuring rider of animal; occupant of animal-drawn vehicle |
| E812.6     | Mv coll NOS-ped cycl    | Other motor vehicle traffic accident involving collision with motor vehicle injuring pedal cyclist                                     |
| E812.7     | Mv collision NOS-pedest | Other motor vehicle traffic accident involving collision with motor vehicle injuring pedestrian                                        |

|        |                          |                                                                                                                                  |
|--------|--------------------------|----------------------------------------------------------------------------------------------------------------------------------|
| E812.8 | Mv collis NOS-pers NEC   | Other motor vehicle traffic accident involving collision with motor vehicle injuring other specified person                      |
| E812.9 | Mv collis NOS-pers NOS   | Other motor vehicle traffic accident involving collision with motor vehicle injuring unspecified person                          |
| E813.0 | Mv-oth veh coll-driver   | Motor vehicle traffic accident involving collision with other vehicle injuring driver of motor vehicle other than motorcycle     |
| E813.1 | Mv-oth veh coll-pasngr   | Motor vehicle traffic accident involving collision with other vehicle injuring passenger in motor vehicle other than motorcycle  |
| E813.2 | Mv-oth veh coll-motcycl  | Motor vehicle traffic accident involving collision with other vehicle injuring motorcyclist                                      |
| E813.3 | Mv-oth veh coll-mcyc psg | Motor vehicle traffic accident involving collision with other vehicle injuring passenger on motorcycle                           |
| E813.4 | Mv-oth veh coll-st car   | Motor vehicle traffic accident involving collision with other vehicle injuring occupant of streetcar                             |
| E813.5 | Mv-oth veh coll-anim rid | Motor vehicle traffic accident involving collision with other vehicle injuring rider of animal; occupant of animal-drawn vehicle |
| E813.6 | Mv-oth veh coll-ped cycl | Motor vehicle traffic accident involving collision with other vehicle injuring pedal cyclist                                     |
| E813.7 | Mv-oth veh coll-pedest   | Motor vehicle traffic accident involving collision with other vehicle injuring pedestrian                                        |
| E813.8 | Mv-oth veh coll-pers NEC | Motor vehicle traffic accident involving collision with other vehicle injuring other specified person                            |
| E813.9 | Mv-oth veh coll-pers NOS | Motor vehicle traffic accident involving collision with other vehicle injuring unspecified person                                |
| E814.0 | Mv coll w pedest-driver  | Motor vehicle traffic accident involving collision with pedestrian injuring driver of motor vehicle other than motorcycle        |
| E814.1 | Mv coll w pedest-pasngr  | Motor vehicle traffic accident involving collision with pedestrian injuring passenger in motor vehicle other than motorcycle     |
| E814.2 | Mv coll w pedest-motcycl | Motor vehicle traffic accident involving collision with pedestrian injuring motorcyclist                                         |
| E814.3 | Mv coll w ped-mcycl psgr | Motor vehicle traffic accident involving collision with pedestrian injuring passenger on motorcycle                              |
| E814.4 | Mv coll w pedest-st car  | Motor vehicle traffic accident involving collision with pedestrian injuring occupant of streetcar                                |
| E814.5 | Mv coll w ped-anim rid   | Motor vehicle traffic accident involving collision with pedestrian injuring rider of animal; occupant of animal drawn vehicle    |
| E814.6 | Mv coll w ped-ped cycl   | Motor vehicle traffic accident involving collision with pedestrian injuring pedal cyclist                                        |

|        |                          |                                                                                                                                                    |
|--------|--------------------------|----------------------------------------------------------------------------------------------------------------------------------------------------|
| E814.7 | Mv coll w pedest-pedest  | Motor vehicle traffic accident involving collision with pedestrian injuring pedestrian                                                             |
| E814.8 | Mv coll w pedes-pers NEC | Motor vehicle traffic accident involving collision with pedestrian injuring other specified person                                                 |
| E814.9 | Mv coll w pedes-pers NOS | Motor vehicle traffic accident involving collision with pedestrian injuring unspecified person                                                     |
| E815.0 | Mv coll w oth obj-driver | Other motor vehicle traffic accident involving collision on the highway injuring driver of motor vehicle other than motorcycle                     |
| E815.1 | Mv coll w oth obj-pasngr | Other motor vehicle traffic accident involving collision on the highway injuring passenger in motor vehicle other than motorcycle                  |
| E815.2 | Mv coll w oth obj-mocycl | Other motor vehicle traffic accident involving collision on the highway injuring motorcyclist                                                      |
| E815.3 | Mv coll w obj-mcycl psgr | Other motor vehicle traffic accident involving collision on the highway injuring passenger on motorcycle                                           |
| E815.4 | Mv coll w obj-st car     | Other motor vehicle traffic accident involving collision on the highway injuring occupant of streetcar                                             |
| E815.5 | Mv coll w obj-anim rider | Other motor vehicle traffic accident involving collision on the highway injuring rider of animal; occupant of animal-drawn vehicle                 |
| E815.6 | Mv coll w obj-ped cycl   | Other motor vehicle traffic accident involving collision on the highway injuring pedal cyclist                                                     |
| E815.7 | Mv coll w obj-pedest     | Other motor vehicle traffic accident involving collision on the highway injuring pedestrian                                                        |
| E815.8 | Mv coll w obj-pers NEC   | Other motor vehicle traffic accident involving collision on the highway injuring other specified person                                            |
| E815.9 | Mv coll w obj-pers NOS   | Other motor vehicle traffic accident involving collision on the highway injuring unspecified person                                                |
| E816.0 | Loss control mv acc-driv | Motor vehicle traffic accident due to loss of control, without collision on the highway, injuring driver of motor vehicle other than motorcycle    |
| E816.1 | Loss control mv acc-psgr | Motor vehicle traffic accident due to loss of control, without collision on the highway, injuring passenger in motor vehicle other than motorcycle |
| E816.2 | Loss control mv-mocycl   | Motor vehicle traffic accident due to loss of control, without collision on the highway, injuring motorcyclist                                     |
| E816.3 | Loss control mv-mcyc psg | Motor vehicle traffic accident due to loss of control, without collision on the highway, injuring passenger on motorcycle                          |

|        |                          |                                                                                                                                                     |
|--------|--------------------------|-----------------------------------------------------------------------------------------------------------------------------------------------------|
| E816.4 | Loss cont mv acc-st car  | Motor vehicle traffic accident due to loss of control, without collision on the highway, injuring occupant of streetcar                             |
| E816.5 | Loss cont mv-anim rider  | Motor vehicle traffic accident due to loss of control, without collision on the highway, injuring rider of animal; occupant of animal-drawn vehicle |
| E816.6 | Loss control mv-ped cycl | Motor vehicle traffic accident due to loss of control, without collision on the highway, injuring pedal cyclist                                     |
| E816.7 | Loss control mv-pedest   | Motor vehicle traffic accident due to loss of control, without collision on the highway, injuring pedestrian                                        |
| E816.8 | Loss control mv-pers NEC | Motor vehicle traffic accident due to loss of control, without collision on the highway, injuring other specified person                            |
| E816.9 | Loss control mv-pers NOS | Motor vehicle traffic accident due to loss of control, without collision on the highway, injuring unspecified person                                |
| E819.0 | Traffic acc NOS-driver   | Motor vehicle traffic accident of unspecified nature injuring driver of motor vehicle other than motorcycle                                         |
| E819.1 | Traffic acc NOS-pasngr   | Motor vehicle traffic accident of unspecified nature injuring passenger in motor vehicle other than motorcycle                                      |
| E819.2 | Traffic acc NOS-motcycl  | Motor vehicle traffic accident of unspecified nature injuring motorcyclist                                                                          |
| E819.3 | Traff acc NOS-mcycl psgr | Motor vehicle traffic accident of unspecified nature injuring passenger on motorcycle                                                               |
| E819.4 | Traffic acc NOS-st car   | Motor vehicle traffic accident of unspecified nature injuring occupant of streetcar                                                                 |
| E819.5 | Traff acc NOS-anim rider | Motor vehicle traffic accident of unspecified nature injuring rider of animal; occupant of animal-drawn vehicle                                     |
| E819.6 | Traffic acc NOS-ped cycl | Motor vehicle traffic accident of unspecified nature injuring pedal cyclist                                                                         |
| E819.7 | Traffic acc NOS-pedest   | Motor vehicle traffic accident of unspecified nature injuring pedestrian                                                                            |
| E819.8 | Traffic acc NOS-pers NEC | Motor vehicle traffic accident of unspecified nature injuring other specified person                                                                |
| E819.9 | Traffic acc NOS-pers NOS | Motor vehicle traffic accident of unspecified nature injuring unspecified person                                                                    |

**Overdose injuries**

| <b>ICD-9 Code</b> | <b>Short Description</b> | <b>Long Description</b>                                                              |
|-------------------|--------------------------|--------------------------------------------------------------------------------------|
| E950.0            | Poison-analgesics        | Suicide and self-inflicted poisoning by analgesics, antipyretics, and antirheumatics |

|        |                         |                                                                                        |
|--------|-------------------------|----------------------------------------------------------------------------------------|
| E950.1 | Poison-barbiturates     | Suicide and self-inflicted poisoning by barbiturates                                   |
| E950.2 | Poison-sedat/hypnotic   | Suicide and self-inflicted poisoning by other sedatives and hypnotics                  |
| E950.3 | Poison-psychotropic agt | Suicide and self-inflicted poisoning by tranquilizers and other psychotropic agents    |
| E950.4 | Poison-drug/medicin NEC | Suicide and self-inflicted poisoning by other specified drugs and medicinal substances |
| E950.5 | Poison-drug/medicin NOS | Suicide and self-inflicted poisoning by unspecified drug or medicinal substance        |

#### Assault-based gunshot injuries

| ICD-9 Code | Short Description       | Long Description                         |
|------------|-------------------------|------------------------------------------|
| E965.0     | Assault-handgun         | Assault by handgun                       |
| E965.1     | Assault-shotgun         | Assault by shotgun                       |
| E965.2     | Assault-hunting rifle   | Assault by hunting rifle                 |
| E965.3     | Assault-military weapon | Assault by military firearms             |
| E965.4     | Assault-firearm NEC     | Assault by other and unspecified firearm |

#### Low offspring birthweight

| ICD-9 Code | Short Description        | Long Description                                            |
|------------|--------------------------|-------------------------------------------------------------|
| 764.9      | Fet growth retard wtNOS  | Fetal growth retardation, unspecified, unspecified [weight] |
| 764.91     | Fet growth retard <500g  | Fetal growth retardation, unspecified, less than 500 grams  |
| 764.92     | Fet growth ret 500-749g  | Fetal growth retardation, unspecified, 500-749 grams        |
| 764.93     | Fet growth ret 750-999g  | Fetal growth retardation, unspecified, 750-999 grams        |
| 764.94     | Fet grwth ret 1000-1249g | Fetal growth retardation, unspecified, 1,000-1,249 grams    |
| 764.95     | Fet grwth ret 1250-1499g | Fetal growth retardation, unspecified, 1,250-1,499 grams    |
| 764.96     | Fet grwth ret 1500-1749g | Fetal growth retardation, unspecified, 1,500-1,749 grams    |
| 764.97     | Fet grwth ret 1750-1999g | Fetal growth retardation, unspecified, 1,750-1,999 grams    |
| 764.98     | Fet grwth ret 2000-2499g | Fetal growth retardation, unspecified, 2,000-2,499 grams    |
| 764.99     | Fet growth ret 2500+g    | Fetal growth retardation, unspecified, 2,500 grams and over |

#### Maternal pregnancy complications

| ICD-9 Code | Short Description       | Long Description                                                                                   |
|------------|-------------------------|----------------------------------------------------------------------------------------------------|
| 640.8      | Hem early preg NEC-unsp | Other specified hemorrhage in early pregnancy, unspecified as to episode of care or not applicable |

|        |                           |                                                                                                                                                  |
|--------|---------------------------|--------------------------------------------------------------------------------------------------------------------------------------------------|
| 640.81 | Hem early preg NEC-deliv  | Other specified hemorrhage in early pregnancy, delivered, with or without mention of antepartum condition                                        |
| 640.83 | Hem early pg NEC-anteapar | Other specified hemorrhage in early pregnancy, antepartum condition or complication                                                              |
| 640.9  | Hemorr early preg-unspec  | Unspecified hemorrhage in early pregnancy, unspecified as to episode of care or not applicable                                                   |
| 640.91 | Hem early preg-delivered  | Unspecified hemorrhage in early pregnancy, delivered, with or without mention of antepartum condition                                            |
| 640.93 | Hem early preg-anteapart  | Unspecified hemorrhage in early pregnancy, antepartum condition or complication                                                                  |
| 641    | Placenta previa-unspec    | Placenta previa without hemorrhage, unspecified as to episode of care or not applicable                                                          |
| 641.01 | Placenta previa-deliver   | Placenta previa without hemorrhage, delivered, with or without mention of antepartum condition                                                   |
| 641.03 | Placenta previa-anteapart | Placenta previa without hemorrhage, antepartum condition or complication                                                                         |
| 641.1  | Placenta prev hem-unspec  | Hemorrhage from placenta previa, unspecified as to episode of care or not applicable                                                             |
| 641.11 | Placenta prev hem-deliv   | Hemorrhage from placenta previa, delivered, with or without mention of antepartum condition                                                      |
| 641.13 | Placen prev hem-anteapart | Hemorrhage from placenta previa, antepartum condition or complication                                                                            |
| 641.2  | Prem separ placen-unspec  | Premature separation of placenta, unspecified as to episode of care or not applicable                                                            |
| 641.21 | Prem separ placen-deliv   | Premature separation of placenta, delivered, with or without mention of antepartum condition                                                     |
| 641.23 | Prem separ plac-anteapart | Premature separation of placenta, antepartum condition or complication                                                                           |
| 642    | Essen hyperten preg-unsp  | Benign essential hypertension complicating pregnancy, childbirth, and the puerperium, unspecified as to episode of care or not applicable        |
| 642.01 | Essen hyperten-delivered  | Benign essential hypertension complicating pregnancy, childbirth, and the puerperium, delivered, with or without mention of antepartum condition |
| 642.02 | Essen hyperten-del w p/p  | Benign essential hypertension, complicating pregnancy, childbirth, and the puerperium, delivered, with mention of postpartum complication        |
| 642.03 | Essen hyperten-anteapart  | Benign essential hypertension complicating pregnancy, childbirth, and the puerperium, antepartum condition or complication                       |

|        |                          |                                                                                                                                  |
|--------|--------------------------|----------------------------------------------------------------------------------------------------------------------------------|
| 642.04 | Essen hyperten-postpart  | Benign essential hypertension complicating pregnancy, childbirth, and the puerperium, postpartum condition or complication       |
| 642.3  | Trans hyperten preg-unsp | Transient hypertension of pregnancy, unspecified as to episode of care or not applicable                                         |
| 642.31 | Trans hyperten-delivered | Transient hypertension of pregnancy, delivered , with or without mention of antepartum condition                                 |
| 642.32 | Trans hyperten-del w p/p | Transient hypertension of pregnancy, delivered, with mention of postpartum complication                                          |
| 642.33 | Trans hyperten-antepart  | Transient hypertension of pregnancy, antepartum condition or complication                                                        |
| 642.34 | Trans hyperten-postpart  | Transient hypertension of pregnancy, postpartum condition or complication                                                        |
| 642.4  | Mild/NOS preeclamp-unsp  | Mild or unspecified pre-eclampsia, unspecified as to episode of care or not applicable                                           |
| 642.41 | Mild/NOS preeclamp-deliv | Mild or unspecified pre-eclampsia, delivered, with or without mention of antepartum condition                                    |
| 642.42 | Mild preeclamp-del w p/p | Mild or unspecified pre-eclampsia, delivered, with mention of postpartum complication                                            |
| 642.43 | Mild/NOS preeclamp-antep | Mild or unspecified pre-eclampsia, antepartum condition or complication                                                          |
| 642.44 | Mild/NOS preeclamp-p/p   | Mild or unspecified pre-eclampsia, postpartum condition or complication                                                          |
| 642.5  | Severe preeclamp-unspec  | Severe pre-eclampsia, unspecified as to episode of care or not applicable                                                        |
| 642.51 | Severe preeclamp-deliver | Severe pre-eclampsia, delivered, with or without mention of antepartum condition                                                 |
| 642.52 | Sev preeclamp-del w p/p  | Severe pre-eclampsia, delivered, with mention of postpartum complication                                                         |
| 642.53 | Sev preeclamp-antepartum | Severe pre-eclampsia, antepartum condition or complication                                                                       |
| 642.54 | Sev preeclamp-postpartum | Severe pre-eclampsia, postpartum condition or complication                                                                       |
| 642.6  | Eclampsia-unspecified    | Eclampsia, unspecified as to episode of care or not applicable                                                                   |
| 642.61 | Eclampsia-delivered      | Eclampsia, delivered, with or without mention of antepartum condition                                                            |
| 642.62 | Eclampsia-deliv w p/p    | Eclampsia, delivered, with mention of postpartum complication                                                                    |
| 642.63 | Eclampsia-antepartum     | Eclampsia, antepartum condition or complication                                                                                  |
| 642.64 | Eclampsia-postpartum     | Eclampsia, postpartum condition or complication                                                                                  |
| 642.7  | Tox w old hyperten-unsp  | Pre-eclampsia or eclampsia superimposed on pre-existing hypertension, unspecified as to episode of care or not applicable        |
| 642.71 | Tox w old hyperten-deliv | Pre-eclampsia or eclampsia superimposed on pre-existing hypertension, delivered, with or without mention of antepartum condition |



|        |                           |                                                                                                                                            |
|--------|---------------------------|--------------------------------------------------------------------------------------------------------------------------------------------|
| 642.72 | Tox w old hyp-del w p/p   | Pre-eclampsia or eclampsia superimposed on pre-existing hypertension, delivered, with mention of postpartum complication                   |
| 642.73 | Tox w old hyper-ante part | Pre-eclampsia or eclampsia superimposed on pre-existing hypertension, antepartum condition or complication                                 |
| 642.74 | Tox w old hyper-postpart  | Pre-eclampsia or eclampsia superimposed on pre-existing hypertension, postpartum condition or complication                                 |
| 642.9  | Hyperten preg NOS-unspec  | Unspecified hypertension complicating pregnancy, childbirth, or the puerperium, unspecified as to episode of care or not applicable        |
| 642.91 | Hypertens NOS-delivered   | Unspecified hypertension complicating pregnancy, childbirth, or the puerperium, delivered, with or without mention of antepartum condition |
| 642.92 | Hypertens NOS-del w p/p   | Unspecified hypertension complicating pregnancy, childbirth, or the puerperium, delivered, with mention of postpartum complication         |
| 642.93 | Hypertens NOS-ante partum | Unspecified hypertension complicating pregnancy, childbirth, or the puerperium, antepartum condition or complication                       |
| 642.94 | Hypertens NOS-postpartum  | Unspecified hypertension complicating pregnancy, childbirth, or the puerperium, postpartum condition or complication                       |
| 646.8  | Preg compl NEC-unspec     | Other specified complications of pregnancy, unspecified as to episode of care or not applicable                                            |
| 646.81 | Preg compl NEC-delivered  | Other specified complications of pregnancy, delivered, with or without mention of antepartum condition                                     |
| 646.82 | Preg compl NEC-del w p/p  | Other specified complications of pregnancy, delivered, with mention of postpartum complication                                             |
| 646.83 | Preg compl NEC-ante part  | Other specified complications of pregnancy, antepartum condition or complication                                                           |
| 646.84 | Preg compl NEC-postpart   | Other specified complications of pregnancy, postpartum condition or complication                                                           |
| 646.9  | Preg compl NOS-unspec     | Unspecified complication of pregnancy, unspecified as to episode of care or not applicable                                                 |

**Unemployment or low income**

| <b>ICD-9 Code</b> | <b>Short Description</b> | <b>Long Description</b> |
|-------------------|--------------------------|-------------------------|
| V62.0             | Unemployment             | Unemployment            |

**Schizophrenia or other psychoses**

| <b>ICD-9 Code</b> | <b>Short Description</b> | <b>Long Description</b>                                             |
|-------------------|--------------------------|---------------------------------------------------------------------|
| 295               | Simpl schizophren-unspec | Simple type schizophrenia, unspecified                              |
| 295.01            | Simpl schizophren-subchr | Simple type schizophrenia, subchronic                               |
| 295.02            | Simple schizophren-chr   | Simple type schizophrenia, chronic                                  |
| 295.03            | Simp schiz-subchr/exacer | Simple type schizophrenia, subchronic with acute exacerbation       |
| 295.04            | Simpl schizo-chr/exacerb | Simple type schizophrenia, chronic with acute exacerbation          |
| 295.05            | Simpl schizophren-remiss | Simple type schizophrenia, in remission                             |
| 295.1             | Hebephrenia-unspec       | Disorganized type schizophrenia, unspecified                        |
| 295.11            | Hebephrenia-subchronic   | Disorganized type schizophrenia, subchronic                         |
| 295.12            | Hebephrenia-chronic      | Disorganized type schizophrenia, chronic                            |
| 295.13            | Hebephren-subchr/exacerb | Disorganized type schizophrenia, subchronic with acute exacerbation |
| 295.14            | Hebephrenia-chr/exacerb  | Disorganized type schizophrenia, chronic with acute exacerbation    |
| 295.15            | Hebephrenia-remission    | Disorganized type schizophrenia, in remission                       |
| 295.2             | Catatonia-unspec         | Catatonic type schizophrenia, unspecified                           |
| 295.21            | Catatonia-subchronic     | Catatonic type schizophrenia, subchronic                            |
| 295.22            | Catatonia-chronic        | Catatonic type schizophrenia, chronic                               |
| 295.23            | Catatonia-subchr/exacerb | Catatonic type schizophrenia, subchronic with acute exacerbation    |
| 295.24            | Catatonia-chr/exacerb    | Catatonic type schizophrenia, chronic with acute exacerbation       |
| 295.25            | Catatonia-remission      | Catatonic type schizophrenia, in remission                          |
| 295.3             | Paranoid schizo-unspec   | Paranoid type schizophrenia, unspecified                            |
| 295.31            | Paranoid schizo-subchr   | Paranoid type schizophrenia, subchronic                             |
| 295.32            | Paranoid schizo-chronic  | Paranoid type schizophrenia, chronic                                |
| 295.33            | Paran schizo-subchr/exac | Paranoid type schizophrenia, subchronic with acute exacerbation     |
| 295.34            | Paran schizo-chr/exacerb | Paranoid type schizophrenia, chronic with acute exacerbation        |
| 295.35            | Paranoid schizo-remiss   | Paranoid type schizophrenia, in remission                           |
| 295.4             | Schizophreniform dis NOS | Schizophreniform disorder, unspecified                              |
| 295.41            | Schizophrenic dis-subchr | Schizophreniform disorder, subchronic                               |
| 295.42            | Schizophren dis-chronic  | Schizophreniform disorder, chronic                                  |
| 295.43            | Schizo dis-subchr/exacer | Schizophreniform disorder, subchronic with acute exacerbation       |
| 295.44            | Schizophr dis-chr/exacer | Schizophreniform disorder, chronic with acute exacerbation          |
| 295.45            | Schizophrenic dis-remiss | Schizophreniform disorder, in remission                             |
| 295.5             | Latent schizophren-unsp  | Latent schizophrenia, unspecified                                   |
| 295.51            | Lat schizophren-subchr   | Latent schizophrenia, subchronic                                    |
| 295.52            | Latent schizophren-chr   | Latent schizophrenia, chronic                                       |

|        |                           |                                                                                                       |
|--------|---------------------------|-------------------------------------------------------------------------------------------------------|
| 295.53 | Lat schizo-subchr/exacer  | Latent schizophrenia, subchronic with acute exacerbation                                              |
| 295.54 | Latent schizo-chr/exacer  | Latent schizophrenia, chronic with acute exacerbation                                                 |
| 295.55 | Lat schizophren-remiss    | Latent schizophrenia, in remission                                                                    |
| 295.6  | Schizophr dis resid NOS   | Schizophrenic disorders, residual type, unspecified                                                   |
| 295.61 | Schizophr dis resid-subch | Schizophrenic disorders, residual type, subchronic                                                    |
| 295.62 | Schizophr dis resid-chr   | Schizophrenic disorders, residual type, chronic                                                       |
| 295.63 | Schizo resid subchr/exac  | Schizophrenic disorders, residual type, subchronic with acute exacerbation                            |
| 295.64 | Schizophr resid-chro/exac | Schizophrenic disorders, residual type, chronic with acute exacerbation                               |
| 295.65 | Schizophr dis resid-remis | Schizophrenic disorders, residual type, in remission                                                  |
| 296.2  | Depress psychosis-unspec  | Major depressive affective disorder, single episode, unspecified                                      |
| 296.21 | Depress psychosis-mild    | Major depressive affective disorder, single episode, mild                                             |
| 296.22 | Depressive psychosis-mod  | Major depressive affective disorder, single episode, moderate                                         |
| 296.23 | Depress psychosis-severe  | Major depressive affective disorder, single episode, severe, without mention of psychotic behavior    |
| 296.24 | Depr psychos-sev w psych  | Major depressive affective disorder, single episode, severe, specified as with psychotic behavior     |
| 296.25 | Depr psychos-part remiss  | Major depressive affective disorder, single episode, in partial or unspecified remission              |
| 296.26 | Depr psychos-full remiss  | Major depressive affective disorder, single episode, in full remission                                |
| 296.3  | Recurr depr psychos-unsp  | Major depressive affective disorder, recurrent episode, unspecified                                   |
| 296.31 | Recurr depr psychos-mild  | Major depressive affective disorder, recurrent episode, mild                                          |
| 296.32 | Recurr depr psychos-mod   | Major depressive affective disorder, recurrent episode, moderate                                      |
| 296.33 | Recur depr psych-severe   | Major depressive affective disorder, recurrent episode, severe, without mention of psychotic behavior |
| 296.34 | Rec depr psych-psychotic  | Major depressive affective disorder, recurrent episode, severe, specified as with psychotic behavior  |
| 296.35 | Recur depr psyc-part rem  | Major depressive affective disorder, recurrent episode, in partial or unspecified remission           |

|        |                          |                                                                           |
|--------|--------------------------|---------------------------------------------------------------------------|
| 296.36 | Recur depr psyc-full rem | Major depressive affective disorder, recurrent episode, in full remission |
| 298    | React depress psychosis  | Depressive type psychosis                                                 |
| 298.1  | Excitativ type psychosis | Excitative type psychosis                                                 |
| 298.4  | Psychogen paranoid psych | Psychogenic paranoid psychosis                                            |
| 298.8  | React psychosis NEC/NOS  | Other and unspecified reactive psychosis                                  |
| 298.9  | Psychosis NOS            | Unspecified psychosis                                                     |

### Depressive disorders

| ICD-9 Code | Short Description       | Long Description                              |
|------------|-------------------------|-----------------------------------------------|
| 296.82     | Atypical depressive dis | Atypical depressive disorder                  |
| 311        | Depressive disorder NEC | Depressive disorder, not elsewhere classified |

### Suicide

| ICD-9 Code | Short Description       | Long Description                                                                                                                                       |
|------------|-------------------------|--------------------------------------------------------------------------------------------------------------------------------------------------------|
| E950.6     | Poison-agricult agent   | Suicide and self-inflicted poisoning by agricultural and horticultural chemical and pharmaceutical preparations other than plant foods and fertilizers |
| E950.7     | Poison-corrosiv/caustic | Suicide and self-inflicted poisoning by corrosive and caustic substances                                                                               |
| E950.8     | Poison-arsenic          | Suicide and self-inflicted poisoning by arsenic and its compounds                                                                                      |
| E950.9     | Poison-solid/liquid NEC | Suicide and self-inflicted poisoning by other and unspecified solid and liquid substances                                                              |
| E951.0     | Poison-piped gas        | Suicide and self-inflicted poisoning by gas distributed by pipeline                                                                                    |
| E951.1     | Poison-gas in container | Suicide and self-inflicted poisoning by liquefied petroleum gas distributed in mobile containers                                                       |
| E951.8     | Poison-utility gas NEC  | Suicide and self-inflicted poisoning by other utility gas                                                                                              |
| E952.0     | Poison-exhaust gas      | Suicide and self-inflicted poisoning by motor vehicle exhaust gas                                                                                      |
| E952.1     | Poison-co NEC           | Suicide and self-inflicted poisoning by other carbon monoxide                                                                                          |
| E952.8     | Poison-gas/vapor NEC    | Suicide and self-inflicted poisoning by other specified gases and vapors                                                                               |
| E952.9     | Poison-gas/vapor NOS    | Suicide and self-inflicted poisoning by unspecified gases and vapors                                                                                   |
| E953.0     | Injury-hanging          | Suicide and self-inflicted injury by hanging                                                                                                           |
| E953.1     | Injury-suff w plas bag  | Suicide and self-inflicted injury by suffocation by plastic bag                                                                                        |
| E953.8     | Injury-strang/suff NEC  | Suicide and self-inflicted injury by other specified means                                                                                             |
| E953.9     | Injury-strang/suff NOS  | Suicide and self-inflicted injury by unspecified means                                                                                                 |

|        |                          |                                                                               |
|--------|--------------------------|-------------------------------------------------------------------------------|
| E954.  | Injury-submersion        | Suicide and self-inflicted injury by submersion [drowning]                    |
| E955.0 | Injury-handgun           | Suicide and self-inflicted injury by handgun                                  |
| E955.1 | Injury-shotgun           | Suicide and self-inflicted injury by shotgun                                  |
| E955.2 | Injury-hunting rifle     | Suicide and self-inflicted injury by hunting rifle                            |
| E955.3 | Injury-military firearm  | Suicide and self-inflicted injury by military firearms                        |
| E955.4 | Injury-firearm NEC       | Suicide and self-inflicted injury by other and unspecified firearm            |
| E955.5 | Injury-explosives        | Suicide and self-inflicted injury by explosives                               |
| E955.6 | Self inflict acc-air gun | Suicide and self-inflicted injury by air gun                                  |
| E955.7 | Self inj-paintball gun   | Suicide and self-inflicted injury by paintball gun                            |
| E955.9 | Injury-firearm/expl NOS  | Suicide and self-inflicted injury by firearms and explosives, unspecified     |
| E956.  | Injury-cut instrument    | Suicide and self-inflicted injury by cutting and piercing instrument          |
| E957.0 | Injury-jump fm residence | Suicide and self-inflicted injuries by jumping from residential premises      |
| E957.1 | Injury-jump fm struc NEC | Suicide and self-inflicted injuries by jumping from other man-made structures |
| E957.2 | Injury-jump fm natur sit | Suicide and self-inflicted injuries by jumping from natural sites             |
| E957.9 | Injury-jump NEC          | Suicide and self-inflicted injuries by jumping from unspecified site          |
| E958.0 | Injury-moving object     | Suicide and self-inflicted injury by jumping or lying before moving object    |
| E958.1 | Injury-burn, fire        | Suicide and self-inflicted injury by burns, fire                              |
| E958.2 | Injury-scald             | Suicide and self-inflicted injury by scald                                    |
| E958.3 | Injury-extreme cold      | Suicide and self-inflicted injury by extremes of cold                         |
| E958.4 | Injury-electrocution     | Suicide and self-inflicted injury by electrocution                            |
| E958.5 | Injury-motor veh crash   | Suicide and self-inflicted injury by crashing of motor vehicle                |
| E958.6 | Injury-aircraft crash    | Suicide and self-inflicted injury by crashing of aircraft                     |
| E958.7 | Injury-caustic substance | Suicide and self-inflicted injury by caustic substances, except poisoning     |
| E958.8 | Injury-NEC               | Suicide and self-inflicted injury by other specified means                    |
| E958.9 | Injury-NOS               | Suicide and self-inflicted injury by unspecified means                        |

#### Social anxiety disorder

| ICD-9 Code | Short Description | Long Description |
|------------|-------------------|------------------|
| 300.23     | Social phobia     | Social phobia    |

**Anxiety disorders**

| ICD-9 Code | Short Description        | Long Description                                    |
|------------|--------------------------|-----------------------------------------------------|
| 293.84     | Anxiety disorder oth dis | Anxiety disorder in conditions classified elsewhere |
| 300        | Anxiety state NOS        | Anxiety state, unspecified                          |

**Anxiety disorders (except social anxiety)**

| ICD-9 Code | Short Description         | Long Description                                                        |
|------------|---------------------------|-------------------------------------------------------------------------|
| 300.01     | Panic dis w/o agorophobia | Panic disorder without agoraphobia                                      |
| 300.02     | Generalized anxiety dis   | Generalized anxiety disorder                                            |
| 300.09     | Anxiety state NEC         | Other anxiety states                                                    |
| 300.1      | Hysteria NOS              | Hysteria, unspecified                                                   |
| 300.11     | Conversion disorder       | Conversion disorder                                                     |
| 300.12     | Dissociative amnesia      | Dissociative amnesia                                                    |
| 300.13     | Dissociative fugue        | Dissociative fugue                                                      |
| 300.14     | Dissociative identity dis | Dissociative identity disorder                                          |
| 300.15     | Dissociative react NOS    | Dissociative disorder or reaction, unspecified                          |
| 300.16     | Factitious dis w symptom  | Factitious disorder with predominantly psychological signs and symptoms |
| 300.19     | Factitious ill NEC/NOS    | Other and unspecified factitious illness                                |
| 300.2      | Phobia NOS                | Phobia, unspecified                                                     |
| 300.21     | Agoraphobia w panic dis   | Agoraphobia with panic disorder                                         |
| 300.22     | Agoraphobia w/o panic     | Agoraphobia without mention of panic attacks                            |
| 300.29     | Isolated/spec phobia NEC  | Other isolated or specific phobias                                      |
| 300.3      | Obsessive-compulsive dis  | Obsessive-compulsive disorders                                          |
| 300.4      | Dysthymic disorder        | Dysthymic disorder                                                      |
| 300.5      | Neurasthenia              | Neurasthenia                                                            |
| 300.6      | Depersonalization disord  | Depersonalization disorder                                              |
| 300.7      | Hypochondriasis           | Hypochondriasis                                                         |
| 300.81     | Somatization disorder     | Somatization disorder                                                   |
| 300.82     | Undiff somatoform disrd   | Undifferentiated somatoform disorder                                    |
| 300.89     | Somatoform disorders NEC  | Other somatoform disorders                                              |
| 300.9      | Nonpsychotic disord NOS   | Unspecified nonpsychotic mental disorder                                |

**Positive symptoms of schizophrenia (i.e., hallucinations)**

| ICD-9 Code | Short Description       | Long Description                                                     |
|------------|-------------------------|----------------------------------------------------------------------|
| 780.1      | Hallucinations          |                                                                      |
| 293.81     | Psy dis w delus oth dis | Psychotic disorder with delusions in conditions classified elsewhere |
| 333.99     | Extrapyramidal dis NEC  | Other extrapyramidal diseases and abnormal movement disorders        |

**Bipolar disorders**

| ICD-9 Code | Short Description      | Long Description                                                            |
|------------|------------------------|-----------------------------------------------------------------------------|
| 296.5      | Bipol I cur depres NOS | Bipolar I disorder, most recent episode (or current) depressed, unspecified |

|        |                          |                                                                                                               |
|--------|--------------------------|---------------------------------------------------------------------------------------------------------------|
| 296.51 | Bipol I cur depress-mild | Bipolar I disorder, most recent episode (or current) depressed, mild                                          |
| 296.52 | Bipol I cur depress-mod  | Bipolar I disorder, most recent episode (or current) depressed, moderate                                      |
| 296.53 | Bipol I curr dep w/o psy | Bipolar I disorder, most recent episode (or current) depressed, severe, without mention of psychotic behavior |
| 296.54 | Bipol I currnt dep w psy | Bipolar I disorder, most recent episode (or current) depressed, severe, specified as with psychotic behavior  |
| 296.55 | Bipol I cur dep rem NOS  | Bipolar I disorder, most recent episode (or current) depressed, in partial or unspecified remission           |
| 296.56 | Bipol I currnt dep remis | Bipolar I disorder, most recent episode (or current) depressed, in full remission                             |
| 296.6  | Bipol I currnt mixed NOS | Bipolar I disorder, most recent episode (or current) mixed, unspecified                                       |
| 296.61 | Bipol I currnt mix-mild  | Bipolar I disorder, most recent episode (or current) mixed, mild                                              |
| 296.62 | Bipol I currnt mixed-mod | Bipolar I disorder, most recent episode (or current) mixed, moderate                                          |
| 296.63 | Bipol I cur mix w/o psy  | Bipolar I disorder, most recent episode (or current) mixed, severe, without mention of psychotic behavior     |
| 296.64 | Bipol I cur mixed w psy  | Bipolar I disorder, most recent episode (or current) mixed, severe, specified as with psychotic behavior      |
| 296.65 | Bipol I cur mix-part rem | Bipolar I disorder, most recent episode (or current) mixed, in partial or unspecified remission               |
| 296.66 | Bipol I cur mixed remiss | Bipolar I disorder, most recent episode (or current) mixed, in full remission                                 |
| 296.7  | Bipolar I current NOS    | Bipolar I disorder, most recent episode (or current) unspecified                                              |
| 296.8  | Bipolar disorder NOS     | Bipolar disorder, unspecified                                                                                 |
| 296    | Bipol I single manic NOS | Bipolar I disorder, single manic episode, unspecified                                                         |
| 296.01 | Bipol I single manc-mild | Bipolar I disorder, single manic episode, mild                                                                |
| 296.02 | Bipol I single manic-mod | Bipolar I disorder, single manic episode, moderate                                                            |
| 296.03 | Bipol I sing-sev w/o psy | Bipolar I disorder, single manic episode, severe, without mention of psychotic behavior                       |
| 296.04 | Bipo I sin man-sev w psy | Bipolar I disorder, single manic episode, severe, specified as with psychotic behavior                        |
| 296.05 | Bipol I sing man rem NOS | Bipolar I disorder, single manic episode, in partial or unspecified remission                                 |
| 296.06 | Bipol I single manic rem | Bipolar I disorder, single manic episode, in full remission                                                   |

|        |                          |                                                                                                           |
|--------|--------------------------|-----------------------------------------------------------------------------------------------------------|
| 296.4  | Bipol I currnt manic NOS | Bipolar I disorder, most recent episode (or current) manic, unspecified                                   |
| 296.41 | Bipol I curnt manic-mild | Bipolar I disorder, most recent episode (or current) manic, mild                                          |
| 296.42 | Bipol I currnt manic-mod | Bipolar I disorder, most recent episode (or current) manic, moderate                                      |
| 296.43 | Bipol I manc-sev w/o psy | Bipolar I disorder, most recent episode (or current) manic, severe, without mention of psychotic behavior |
| 296.44 | Bipol I manic-sev w psy  | Bipolar I disorder, most recent episode (or current) manic, severe, specified as with psychotic behavior  |
| 296.45 | Bipol I cur man part rem | Bipolar I disorder, most recent episode (or current) manic, in partial or unspecified remission           |
| 296.46 | Bipol I cur man full rem | Bipolar I disorder, most recent episode (or current) manic, in full remission                             |

#### Substance dependence or abuse of alcohol, tobacco, and other illicit drugs

| ICD-9 Code | Short Description        | Long Description                                          |
|------------|--------------------------|-----------------------------------------------------------|
| 303.9      | Alcoh dep NEC/NOS-unspec | Other and unspecified alcohol dependence, unspecified     |
| 303.91     | Alcoh dep NEC/NOS-contin | Other and unspecified alcohol dependence, continuous      |
| 303.92     | Alcoh dep NEC/NOS-episod | Other and unspecified alcohol dependence, episodic        |
| 303.93     | Alcoh dep NEC/NOS-remiss | Other and unspecified alcohol dependence, in remission    |
| 304        | Opioid dependence-unspec | Opioid type dependence, unspecified                       |
| 304.01     | Opioid dependence-contin | Opioid type dependence, continuous                        |
| 304.02     | Opioid dependence-episod | Opioid type dependence, episodic                          |
| 304.03     | Opioid dependence-remiss | Opioid type dependence, in remission                      |
| 304.1      | Sed,hyp,anxiolyt dep-NOS | Sedative, hypnotic or anxiolytic dependence, unspecified  |
| 304.11     | Sed,hyp,anxiolyt dep-con | Sedative, hypnotic or anxiolytic dependence, continuous   |
| 304.12     | Sed,hyp,anxiolyt dep-epi | Sedative, hypnotic or anxiolytic dependence, episodic     |
| 304.13     | Sed,hyp,anxiolyt dep-rem | Sedative, hypnotic or anxiolytic dependence, in remission |
| 304.2      | Cocaine depend-unspec    | Cocaine dependence, unspecified                           |
| 304.21     | Cocaine depend-contin    | Cocaine dependence, continuous                            |
| 304.22     | Cocaine depend-episodic  | Cocaine dependence, episodic                              |
| 304.23     | Cocaine depend-remiss    | Cocaine dependence, in remission                          |
| 304.3      | Cannabis depend-unspec   | Cannabis dependence, unspecified                          |
| 304.31     | Cannabis depend-contin   | Cannabis dependence, continuous                           |
| 304.32     | Cannabis depend-episodic | Cannabis dependence, episodic                             |



|        |                          |                                                                               |
|--------|--------------------------|-------------------------------------------------------------------------------|
| 304.33 | Cannabis depend-remiss   | Cannabis dependence, in remission                                             |
| 304.4  | Amphetamin depend-unspec | Amphetamine and other psychostimulant dependence, unspecified                 |
| 304.41 | Amphetamin depend-contin | Amphetamine and other psychostimulant dependence, continuous                  |
| 304.42 | Amphetamin depend-episod | Amphetamine and other psychostimulant dependence, episodic                    |
| 304.43 | Amphetamin depend-remiss | Amphetamine and other psychostimulant dependence, in remission                |
| 304.5  | Hallucinogen dep-unspec  | Hallucinogen dependence, unspecified                                          |
| 304.51 | Hallucinogen dep-contin  | Hallucinogen dependence, continuous                                           |
| 304.52 | Hallucinogen dep-episod  | Hallucinogen dependence, episodic                                             |
| 304.53 | Hallucinogen dep-remiss  | Hallucinogen dependence, in remission                                         |
| 304.6  | Drug depend NEC-unspec   | Other specified drug dependence, unspecified                                  |
| 304.61 | Drug depend NEC-contin   | Other specified drug dependence, continuous                                   |
| 304.62 | Drug depend NEC-episodic | Other specified drug dependence, episodic                                     |
| 304.63 | Drug depend NEC-in rem   | Other specified drug dependence, in remission                                 |
| 304.7  | Opioid/other dep-unspec  | Combinations of opioid type drug with any other drug dependence, unspecified  |
| 304.71 | Opioid/other dep-contin  | Combinations of opioid type drug with any other drug dependence, continuous   |
| 304.72 | Opioid/other dep-episod  | Combinations of opioid type drug with any other drug dependence, episodic     |
| 304.73 | Opioid/other dep-remiss  | Combinations of opioid type drug with any other drug dependence, in remission |
| 304.8  | Comb drug dep NEC-unspec | Combinations of drug dependence excluding opioid type drug, unspecified       |
| 304.81 | Comb drug dep NEC-contin | Combinations of drug dependence excluding opioid type drug, continuous        |
| 304.82 | Comb drug dep NEC-episod | Combinations of drug dependence excluding opioid type drug, episodic          |
| 304.83 | Comb drug dep NEC-remiss | Combinations of drug dependence excluding opioid type drug, in remission      |
| 304.9  | Drug depend NOS-unspec   | Unspecified drug dependence, unspecified                                      |
| 304.91 | Drug depend NOS-contin   | Unspecified drug dependence, continuous                                       |
| 304.92 | Drug depend NOS-episodic | Unspecified drug dependence, episodic                                         |
| 304.93 | Drug depend NOS-remiss   | Unspecified drug dependence, in remission                                     |
| 305    | Alcohol abuse-unspec     | Alcohol abuse, unspecified                                                    |
| 305.01 | Alcohol abuse-continuous | Alcohol abuse, continuous                                                     |
| 305.02 | Alcohol abuse-episodic   | Alcohol abuse, episodic                                                       |
| 305.03 | Alcohol abuse-in remiss  | Alcohol abuse, in remission                                                   |
| 305.3  | Hallucinog abuse-unspec  | Hallucinogen abuse, unspecified                                               |
| 305.31 | Hallucinog abuse-contin  | Hallucinogen abuse, continuous                                                |
| 305.32 | Hallucinog abuse-episod  | Hallucinogen abuse, episodic                                                  |
| 305.33 | Hallucinog abuse-remiss  | Hallucinogen abuse, in remission                                              |

|        |                          |                                                                   |
|--------|--------------------------|-------------------------------------------------------------------|
| 305.4  | Sed,hyp,anxiolytc ab-NOS | Sedative, hypnotic or anxiolytic abuse, unspecified               |
| 305.41 | Sed,hyp,anxiolytc ab-con | Sedative, hypnotic or anxiolytic abuse, continuous                |
| 305.42 | Sed,hyp,anxiolytc ab-epi | Sedative, hypnotic or anxiolytic abuse, episodic                  |
| 305.43 | Sed,hyp,anxiolytc ab-rem | Sedative, hypnotic or anxiolytic abuse, in remission              |
| 305.5  | Opioid abuse-unspec      | Opioid abuse, unspecified                                         |
| 305.51 | Opioid abuse-continuous  | Opioid abuse, continuous                                          |
| 305.52 | Opioid abuse-episodic    | Opioid abuse, episodic                                            |
| 305.53 | Opioid abuse-in remiss   | Opioid abuse, in remission                                        |
| 305.6  | Cocaine abuse-unspec     | Cocaine abuse, unspecified                                        |
| 305.61 | Cocaine abuse-continuous | Cocaine abuse, continuous                                         |
| 305.62 | Cocaine abuse-episodic   | Cocaine abuse, episodic                                           |
| 305.63 | Cocaine abuse-in remiss  | Cocaine abuse, in remission                                       |
| 305.7  | Amphetamine abuse-unspec | Amphetamine or related acting sympathomimetic abuse, unspecified  |
| 305.71 | Amphetamine abuse-contin | Amphetamine or related acting sympathomimetic abuse, continuous   |
| 305.72 | Amphetamine abuse-episod | Amphetamine or related acting sympathomimetic abuse, episodic     |
| 305.73 | Amphetamine abuse-remiss | Amphetamine or related acting sympathomimetic abuse, in remission |
| 305.8  | Antidepress abuse-unspec | Antidepressant type abuse, unspecified                            |
| 305.81 | Antidepress abuse-contin | Antidepressant type abuse, continuous                             |
| 305.82 | Antidepress abuse-episod | Antidepressant type abuse, episodic                               |
| 305.83 | Antidepress abuse-remiss | Antidepressant type abuse, in remission                           |

#### Cannabis abuse

| ICD-9 Code | Short Description        | Long Description             |
|------------|--------------------------|------------------------------|
| 305.2      | Cannabis abuse-unspec    | Cannabis abuse, unspecified  |
| 305.21     | Cannabis abuse-contin    | Cannabis abuse, continuous   |
| 305.22     | Cannabis abuse-episodic  | Cannabis abuse, episodic     |
| 305.23     | Cannabis abuse-in remiss | Cannabis abuse, in remission |

#### Tobacco use

| ICD-9 Code | Short Description    | Long Description     |
|------------|----------------------|----------------------|
| 305.1      | Tobacco use disorder | Tobacco use disorder |

#### Alcohol abuse

| ICD-9 Code | Short Description        | Long Description                                      |
|------------|--------------------------|-------------------------------------------------------|
| 303.9      | Alcoh dep NEC/NOS-unspec | Other and unspecified alcohol dependence, unspecified |
| 303.91     | Alcoh dep NEC/NOS-contin | Other and unspecified alcohol dependence, continuous  |
| 303.92     | Alcoh dep NEC/NOS-episod | Other and unspecified alcohol dependence, episodic    |

|        |                          |                                                        |
|--------|--------------------------|--------------------------------------------------------|
| 303.93 | Alcoh dep NEC/NOS-remiss | Other and unspecified alcohol dependence, in remission |
|--------|--------------------------|--------------------------------------------------------|

**eFigure 1.** Health outcomes with substantial or moderate evidence of a statistical association with cannabis use based on the National Academy of Science (NAS) summary statement. Medical diagnoses are identified based on a significant ( $P < 0.05$ ) comparison between New York (NY) and Oklahoma (OK) (control states without cannabis legalization) with regards to the change of admission rates for such diagnoses following cannabis legalization. P values for the comparison between Colorado (CO) (site of cannabis legalization) and NY (rhomboid symbol), or between CO and OK (circular symbol) are shown as either  $< 0.05$ , or  $> 0.05$  using a gray scale for evidence of cannabis benefit (risk ratio [RR]  $< 1$  shown on the left) and cannabis harm (RR  $> 1$  shown on the right); 95% confidence intervals are shown for the comparison between CO and NY and between CO and OK as solid and dotted lines, respectively. Progressively darker shades of green or red indicate greater weight of evidence in the direction of proposed benefit versus harm, respectively, by the NAS.

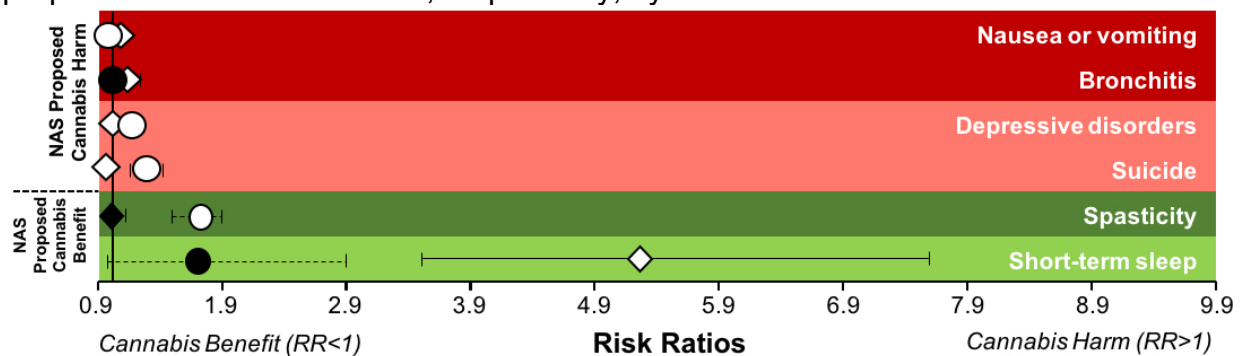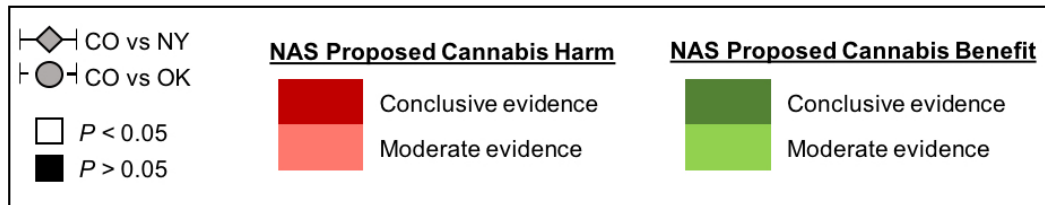

**eFigure 2.** Multivariate adjusted rates of total hospital admissions over 2010-2014 in Colorado, site of implementation of the 2012 recreational cannabis legalization policy, compared with New York (A) and Oklahoma (B), control states without cannabis legalization. Red lines show the predicted rates of admissions for schizophrenia or other psychoses (and all remaining medical diagnoses plotted in eFigures 2-15) had the cannabis legalization policy not been instituted. RR = risk ratio; CI = confidence interval.

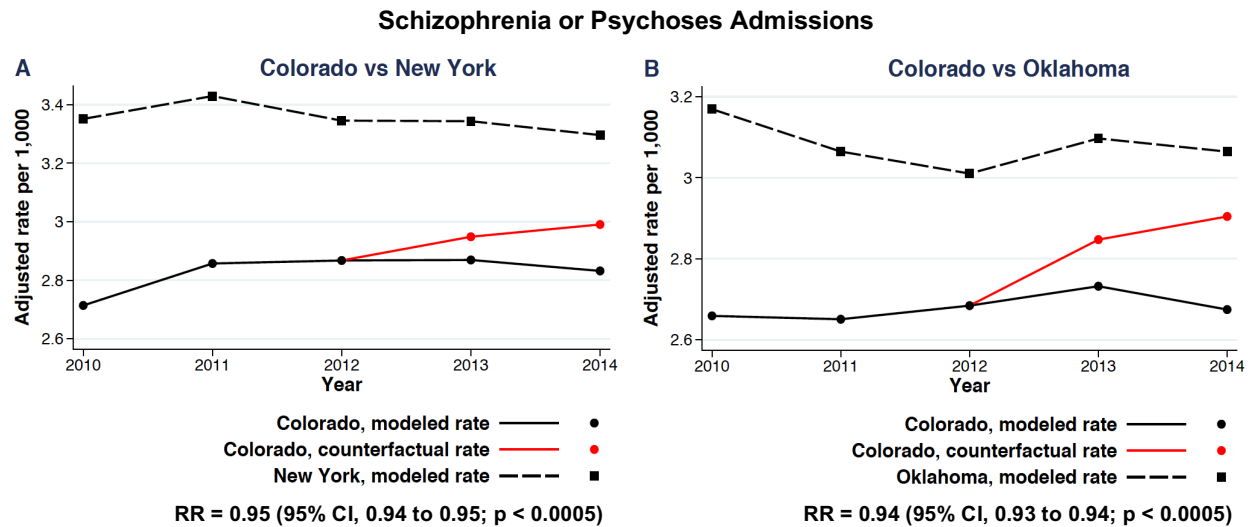

**eFigure 3.** Multivariate adjusted rates of admissions for motor vehicle accidents over 2010-2014 in Colorado compared with New York (A) and Oklahoma (B). RR = risk ratio; CI = confidence interval.

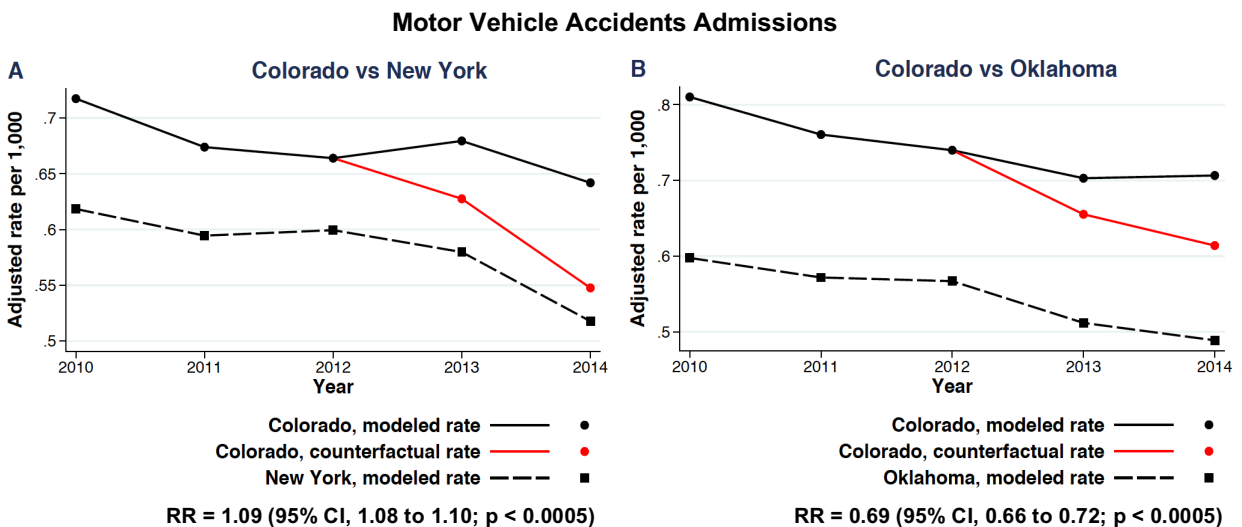

**eFigure 4.** Multivariate adjusted rates of admissions for nausea or vomiting over 2010-2014 in Colorado compared with New York (A) and Oklahoma (B). RR = risk ratio; CI = confidence interval.

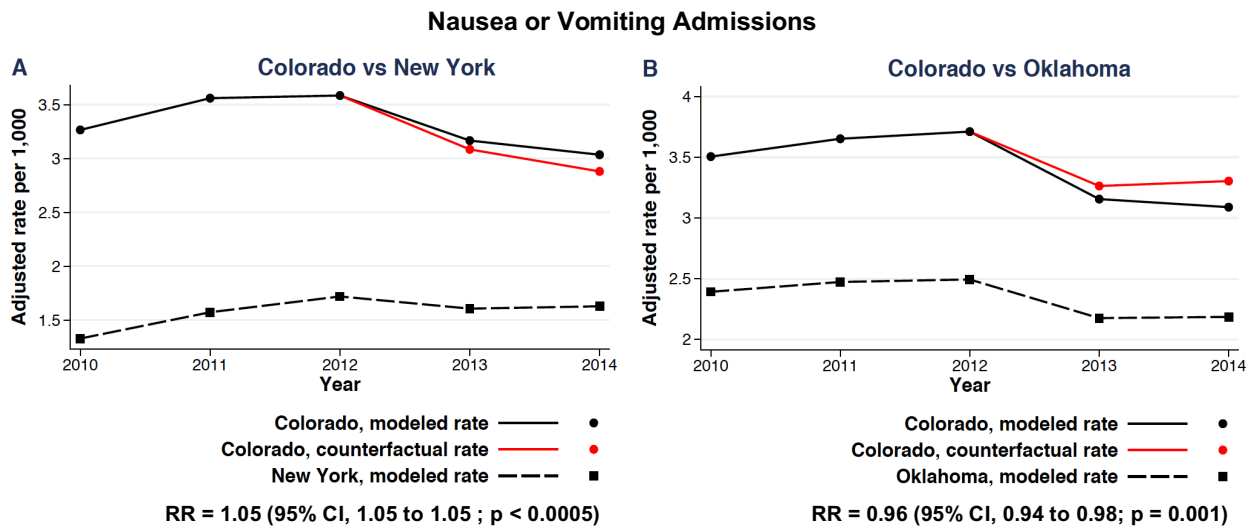

**eFigure 5.** Multivariate adjusted rates of admissions for bronchitis over 2010-2014 in Colorado compared with New York (A) and Oklahoma (B). RR = risk ratio; CI = confidence interval.

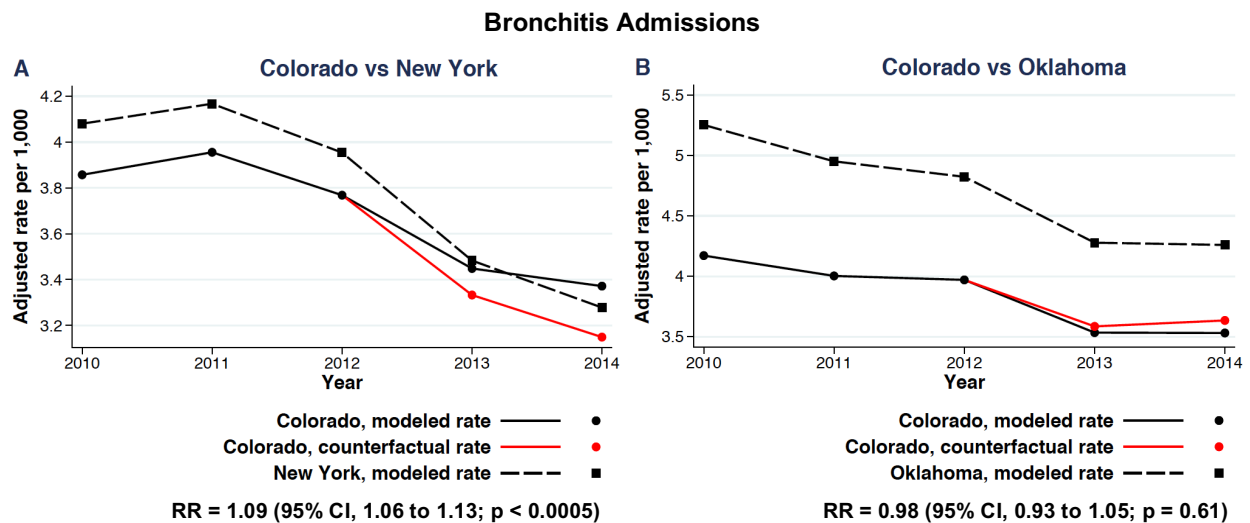

**eFigure 6.** Multivariate adjusted rates of admissions for abuse of other substances over 2010-2014 in Colorado compared with New York (A) and Oklahoma (B). RR = risk ratio; CI = confidence interval.

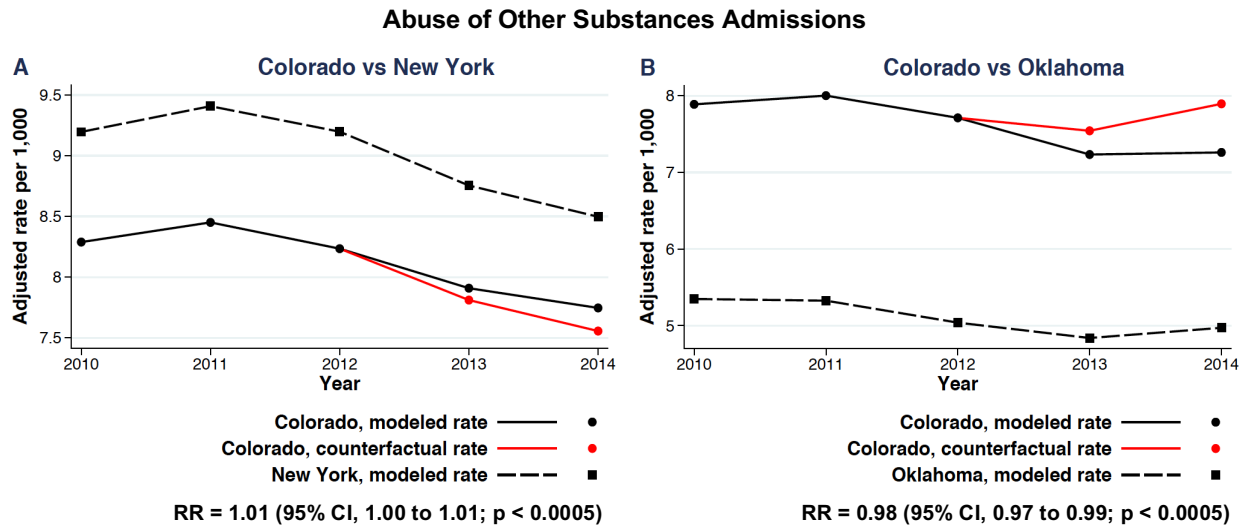

**eFigure 7.** Multivariate adjusted rates of admissions for alcohol abuse over 2010-2014 in Colorado compared with New York (A) and Oklahoma (B). RR = risk ratio; CI = confidence interval.

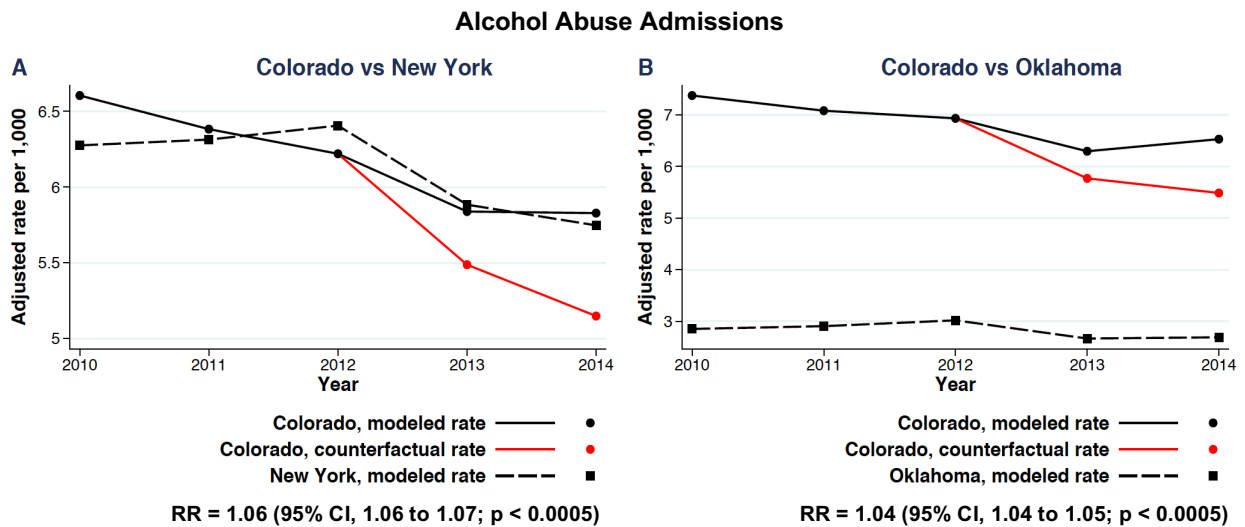

**eFigure 8.** Multivariate adjusted rates of admissions for social anxiety disorder over 2010-2014 in Colorado compared with New York (A) and Oklahoma (B). RR = risk ratio; CI = confidence interval.

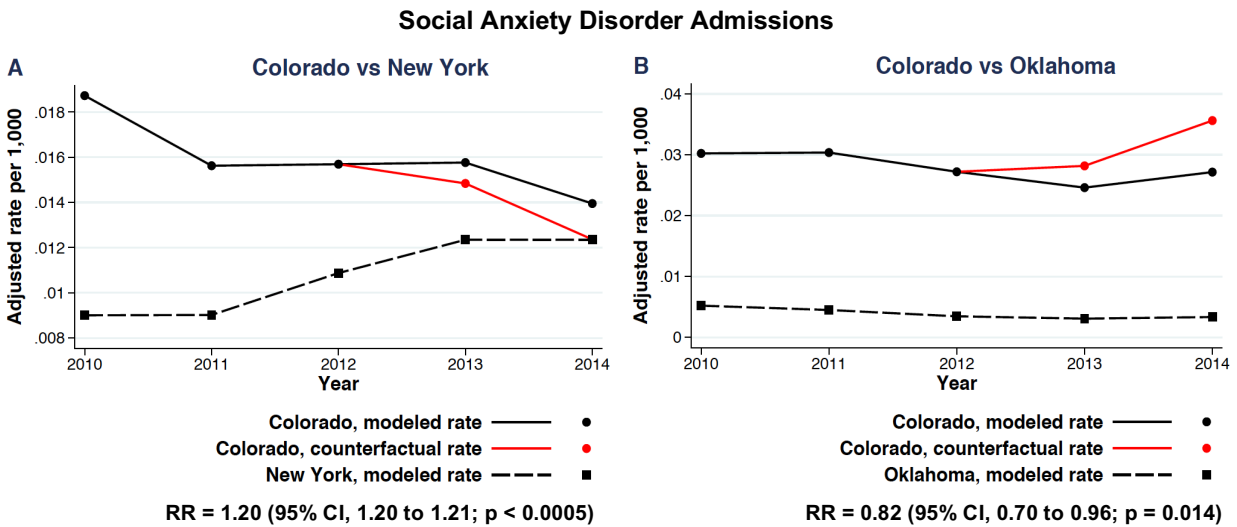

**eFigure 9.** Multivariate adjusted rates of admissions for overdose injury over 2010-2014 in Colorado compared with New York (A) and Oklahoma (B). RR = risk ratio; CI = confidence interval.

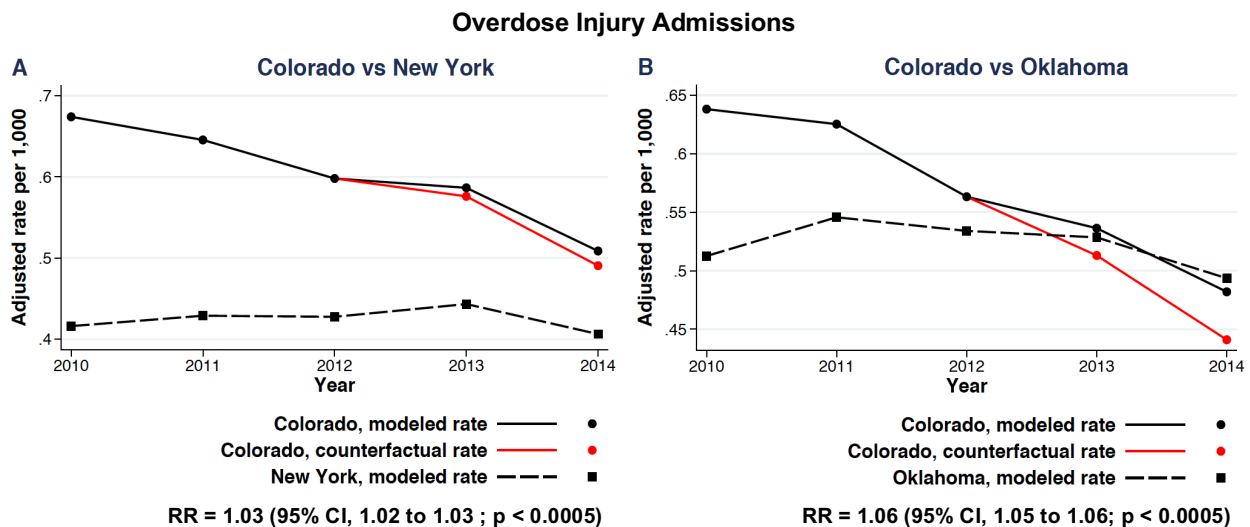



**eFigure 10.** Multivariate adjusted rates of admissions for bipolar disorders over 2010-2014 in Colorado compared with New York (A) and Oklahoma (B). RR = risk ratio; CI = confidence interval.

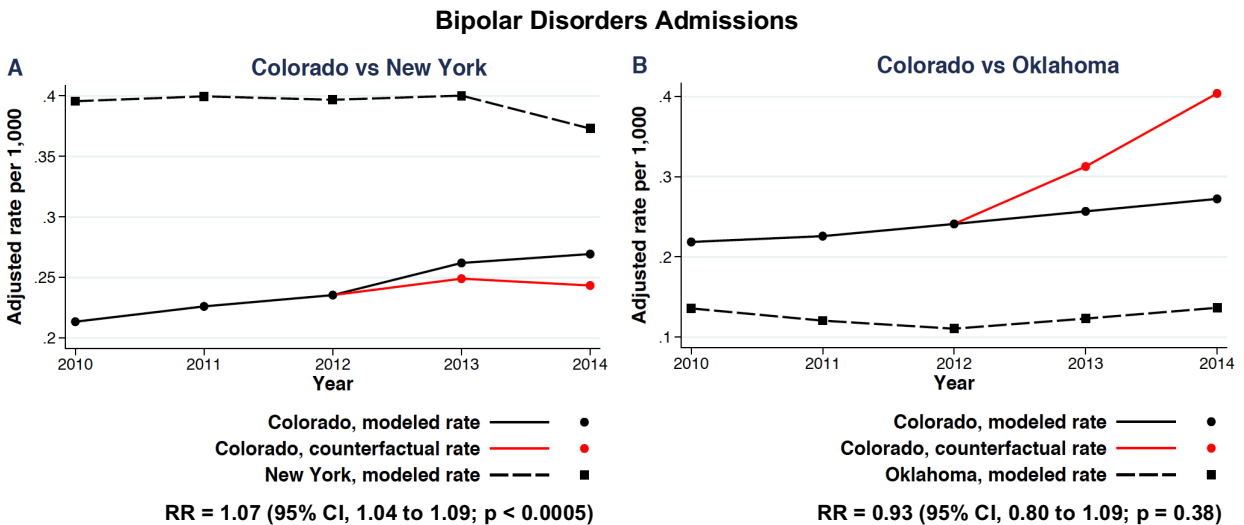

**eFigure 11.** Multivariate adjusted rates of admissions for depressive disorders over 2010-2014 in Colorado compared with New York (A) and Oklahoma (B). RR = risk ratio; CI = confidence interval.

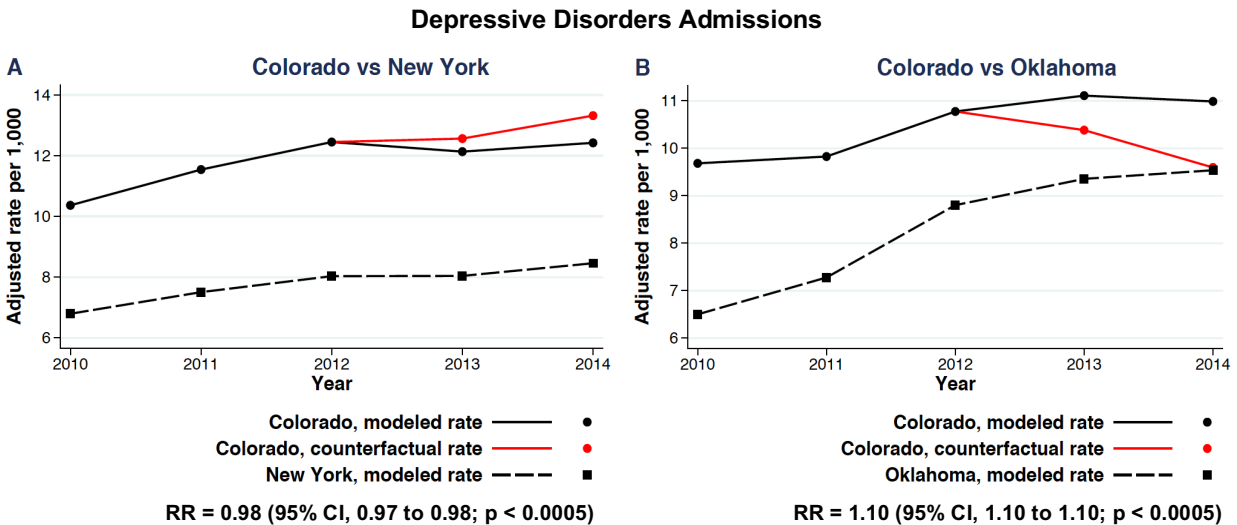

**eFigure 12.** Multivariate adjusted rates of admissions for suicide over 2010-2014 in Colorado compared with New York (A) and Oklahoma (B). RR = risk ratio; CI = confidence interval.

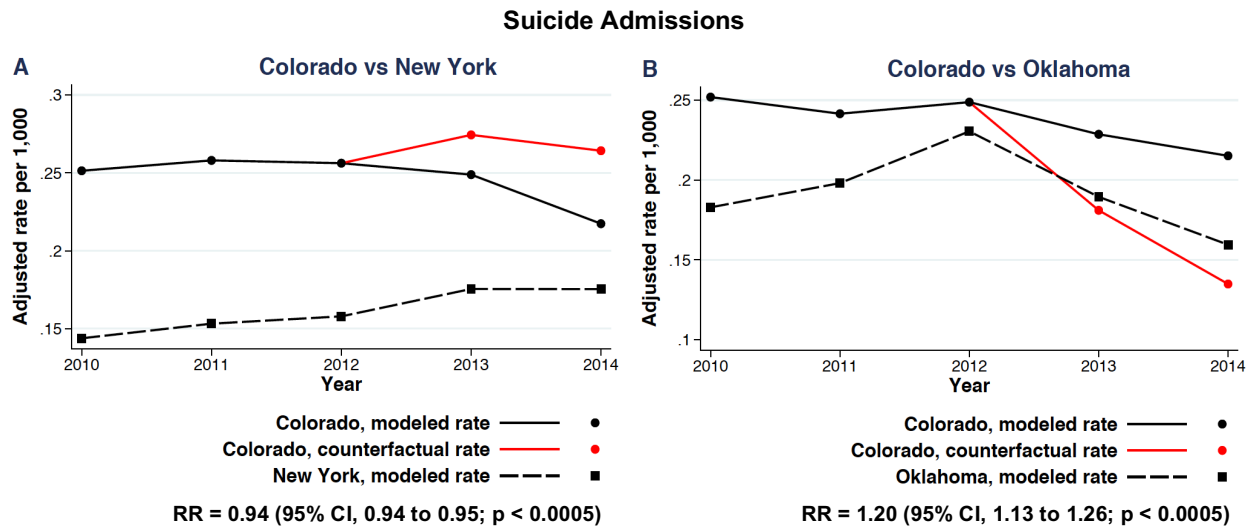

**eFigure 13.** Multivariate adjusted rates of admissions for chronic pain over 2010-2014 in Colorado compared with New York (A) and Oklahoma (B). RR = risk ratio; CI = confidence interval.

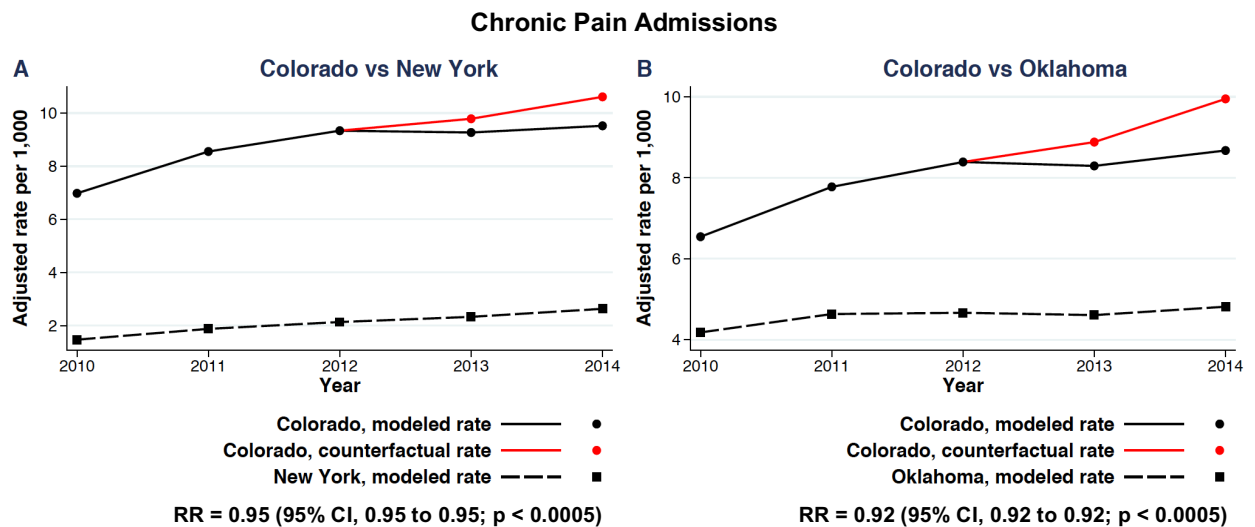

**eFigure 14.** Multivariate adjusted rates of admissions for spasticity over 2010-2014 in Colorado compared with New York (A) and Oklahoma (B). RR = risk ratio; CI = confidence interval.

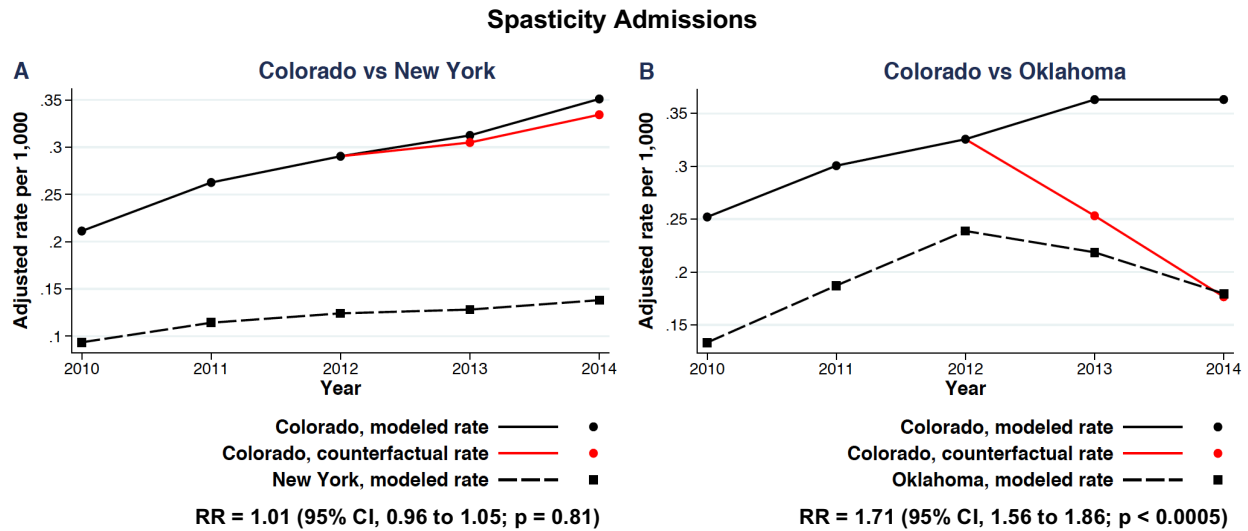

**eFigure 15.** Multivariate adjusted rates of admissions for short-term sleep disorders over 2010-2014 in Colorado compared with New York (A) and Oklahoma (B). RR = risk ratio; CI = confidence interval.

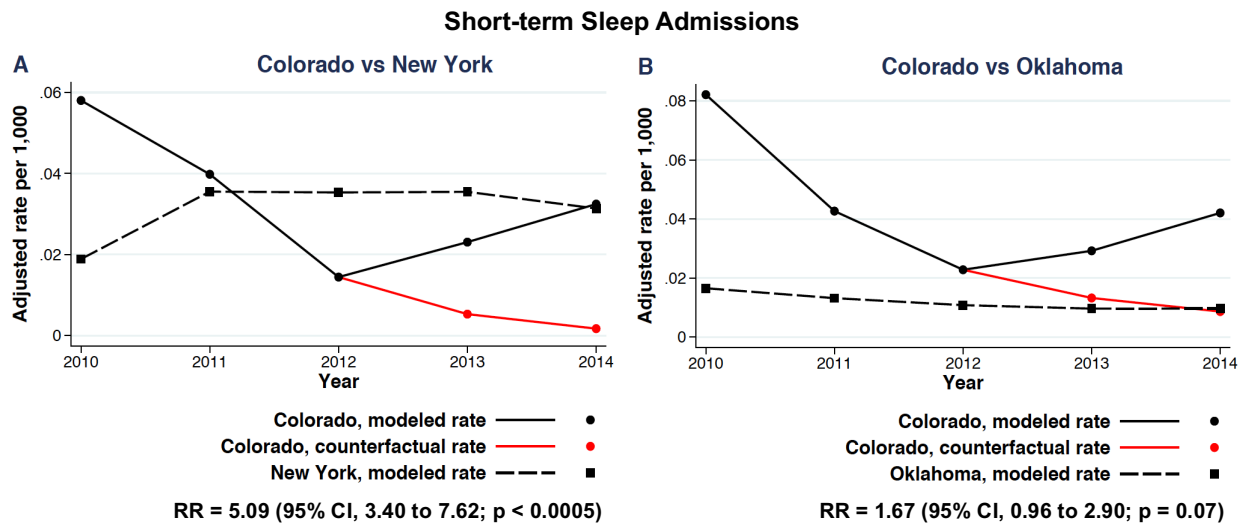

**eTable 3.** Changes in specific NAS outcomes in a sensitivity analysis using January 2014 as the date of recreational cannabis legalization

| <b>NAS Outcome</b>         | <b>State Comparisons</b> | <b>RR</b> | <b>95% CI</b> | <b>P value</b> |
|----------------------------|--------------------------|-----------|---------------|----------------|
| Motor vehicle accidents    | CO vs NY                 | 1.22      | (1.16, 1.28)  | <0.0005        |
|                            | CO vs OK                 | 1.18      | (1.02, 1.37)  | 0.026          |
|                            | NY vs OK                 | 1.04      | (0.77, 1.40)  | 0.81           |
| Overdose injury            | CO vs NY                 | 1.11      | (1.09, 1.14)  | <0.0005        |
|                            | CO vs OK                 | 1.03      | (0.98, 1.09)  | 0.25           |
|                            | NY vs OK                 | 0.98      | (0.80, 1.19)  | 0.81           |
| Bipolar disorders          | CO vs NY                 | 1.08      | (1.06, 1.09)  | <0.0005        |
|                            | CO vs OK                 | 0.81      | (0.73, 0.90)  | <0.0005        |
|                            | NY vs OK                 | 0.77      | (0.75, 0.78)  | <0.0005        |
| Depressive disorders       | CO vs NY                 | 1.01      | (0.99, 1.03)  | 0.59           |
|                            | CO vs OK                 | 1.23      | (1.20, 1.25)  | <0.0005        |
|                            | NY vs OK                 | 1.16      | (1.07, 1.26)  | <0.0005        |
| Schizophrenia or psychoses | CO vs NY                 | 0.84      | (0.82, 0.86)  | <0.0005        |
|                            | CO vs OK                 | 0.80      | (0.79, 0.80)  | <0.0005        |
|                            | NY vs OK                 | 0.88      | (0.87, 0.90)  | <0.0005        |
| Social anxiety disorder    | CO vs NY                 | 1.45      | (1.43, 1.48)  | <0.0005        |
|                            | CO vs OK                 | 0.58      | (0.47, 0.71)  | <0.0005        |
|                            | NY vs OK                 | 0.46      | (0.29, 0.74)  | 0.001          |
| Suicide                    | CO vs NY                 | 1.09      | (1.03, 1.15)  | 0.002          |
|                            | CO vs OK                 | 1.26      | (1.12, 1.41)  | <0.0005        |
|                            | NY vs OK                 | 1.11      | (1.04, 1.18)  | 0.001          |
| Bronchitis                 | CO vs NY                 | 1.19      | (1.15, 1.23)  | <0.0005        |
|                            | CO vs OK                 | 1.03      | (0.97, 1.10)  | 0.33           |
|                            | NY vs OK                 | 0.82      | (0.78, 0.87)  | <0.0005        |
| Abuse of other substances  | CO vs NY                 | 1.04      | (1.03, 1.05)  | <0.0005        |
|                            | CO vs OK                 | 0.99      | (0.97, 1.01)  | 0.45           |
|                            | NY vs OK                 | 0.94      | (0.90, 0.98)  | 0.007          |
| Nausea or vomiting         | CO vs NY                 | 1.08      | (1.06, 1.10)  | <0.0005        |
|                            | CO vs OK                 | 0.95      | (0.97, 1.01)  | <0.0005        |
|                            | NY vs OK                 | 0.89      | (0.90, 0.98)  | 0.01           |
| Chronic pain               | CO vs NY                 | 0.94      | (0.93, 0.96)  | <0.0005        |
|                            | CO vs OK                 | 0.92      | (0.91, 0.93)  | <0.0005        |
|                            | NY vs OK                 | 0.93      | (0.90, 0.96)  | <0.0005        |
| Spasticity                 | CO vs NY                 | 0.75      | (0.71, 0.79)  | <0.0005        |
|                            | CO vs OK                 | 1.56      | (1.14, 2.14)  | 0.006          |
|                            | NY vs OK                 | 2.12      | (1.64, 2.76)  | <0.0005        |
| Short-term sleep           | CO vs NY                 | 11.7      | (7.36, 18.59) | <0.0005        |
|                            | CO vs OK                 | 3.44      | (1.32, 8.99)  | 0.012          |
|                            | NY vs OK                 | 0.45      | (0.06, 3.22)  | 0.42           |
